# Supplementary material for: Phylogeny, distribution and potential metabolism of candidate bacterial phylum KSB1
Source: PeerJ journal article supplement (doi:10.7717/peerj.13241), 2022-04-12

# Phylum

- Gemmatimonadetes
- Fibrobacteres
- Zixibacteria
- Proteobacteria
- Fermentibacterota
- Cyanobacteria
- Candidatus* Tianyabacteria
- Krumholzibacteriota
- SAR406
- Edwardsbacteria
- TA06
- Latescibacteria
- Tenericutes
- Bacteroidota
- WOR-3
- Bacteroidetes
- KSB1
- UBP14

Tree scale: 0.1

## Bootstrap

- 50
- 62.5
- 75
- 87.5
- 100

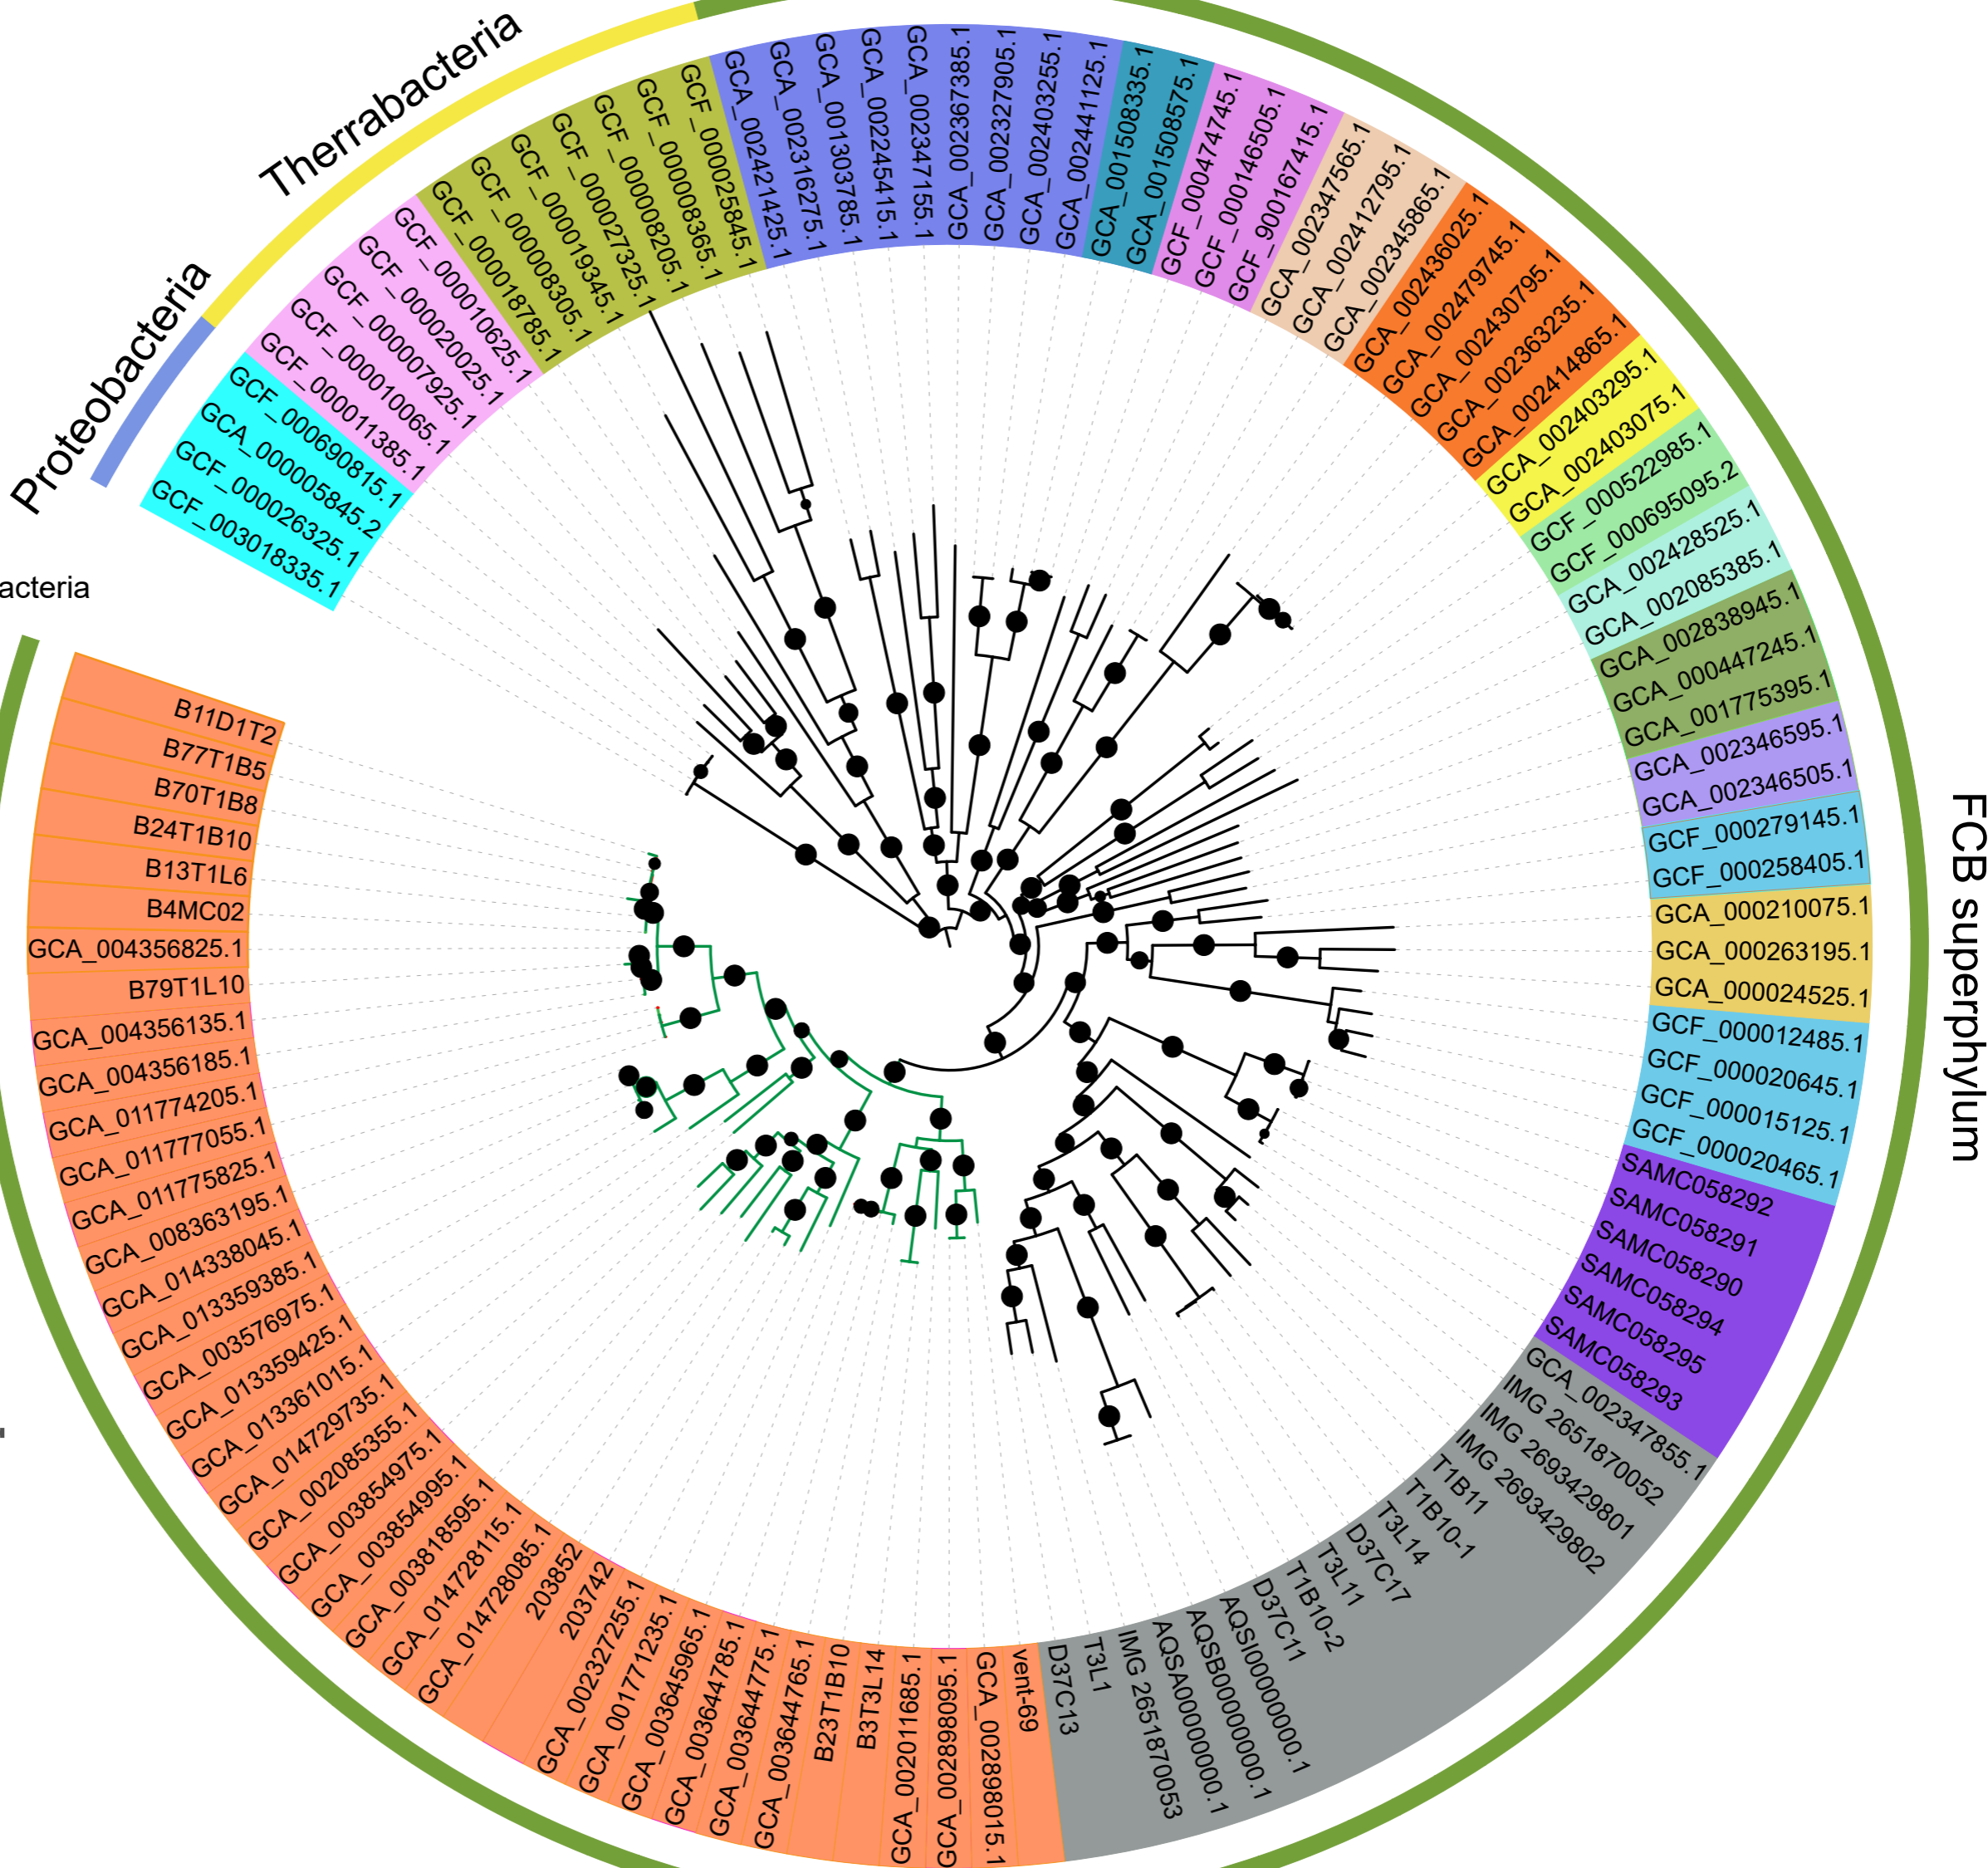

Supplement: Fig_S1.pdf [file Fig_S1.pdf]
