# Supplementary material for: Phylogeny, distribution and potential metabolism of candidate bacterial phylum KSB1
Source: PeerJ journal article supplement (doi:10.7717/peerj.13241), 2022-04-12

relative abundance (%)

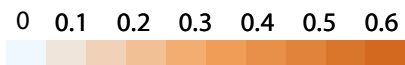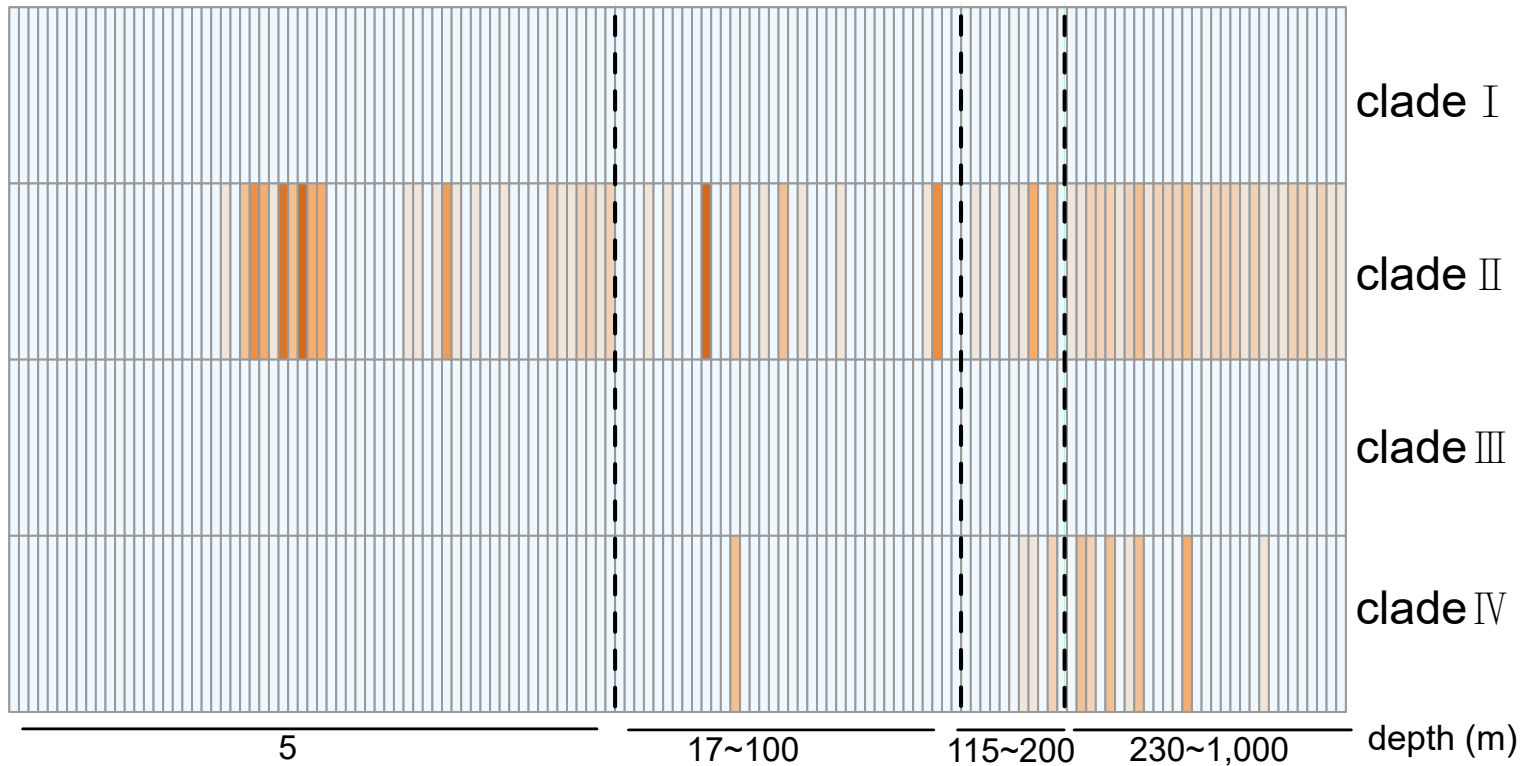

Supplement: Fig_S2.pdf [file Fig_S2.pdf]
