# Supplementary material for: Phylogeny, distribution and potential metabolism of candidate bacterial phylum KSB1
Source: PeerJ journal article supplement (doi:10.7717/peerj.13241), 2022-04-12
Supplement: Fig_S3.pdf [file Fig_S3.pdf]

**A****narG**

bootstrap

- 50
- 62.5
- 75
- 87.5
- 100

Tree scale: 1

GCA 002011685 1 450 2 | **KSB1 clade II**  
 GCA 002011685 1 284 1

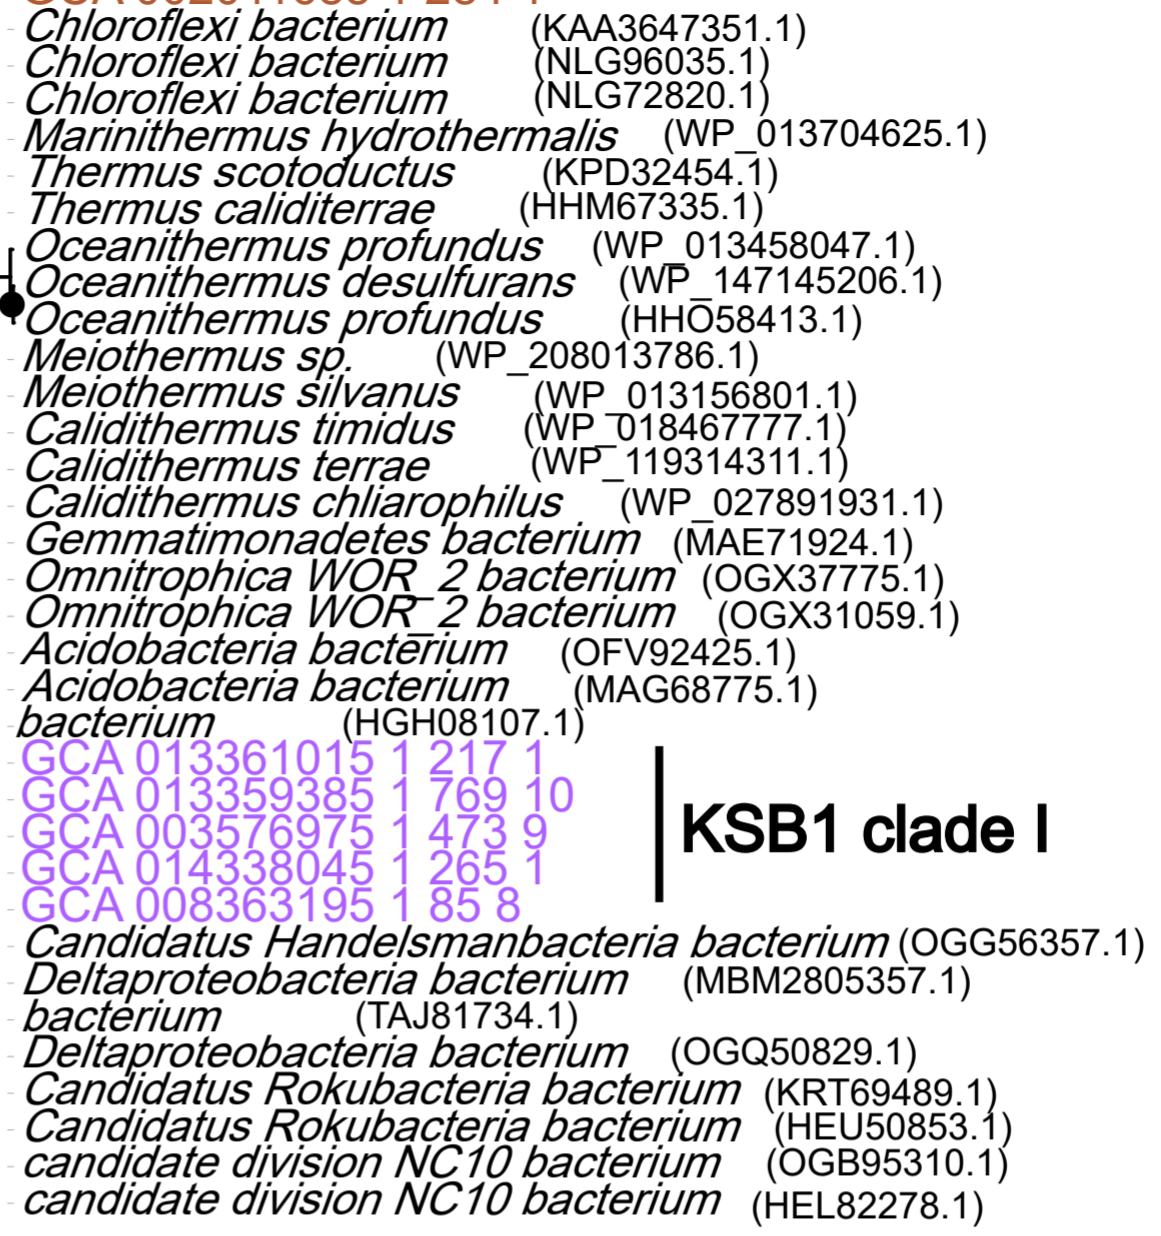**KSB1 clade I****B****nrfA**

bootstrap

- 50
- 62.5
- 75
- 87.5
- 100

Tree scale: 0.1

GCA 014728115 1 119 16  
 GCA 002327255 1 90 20  
 203852 86 4

**KSB1 clade III**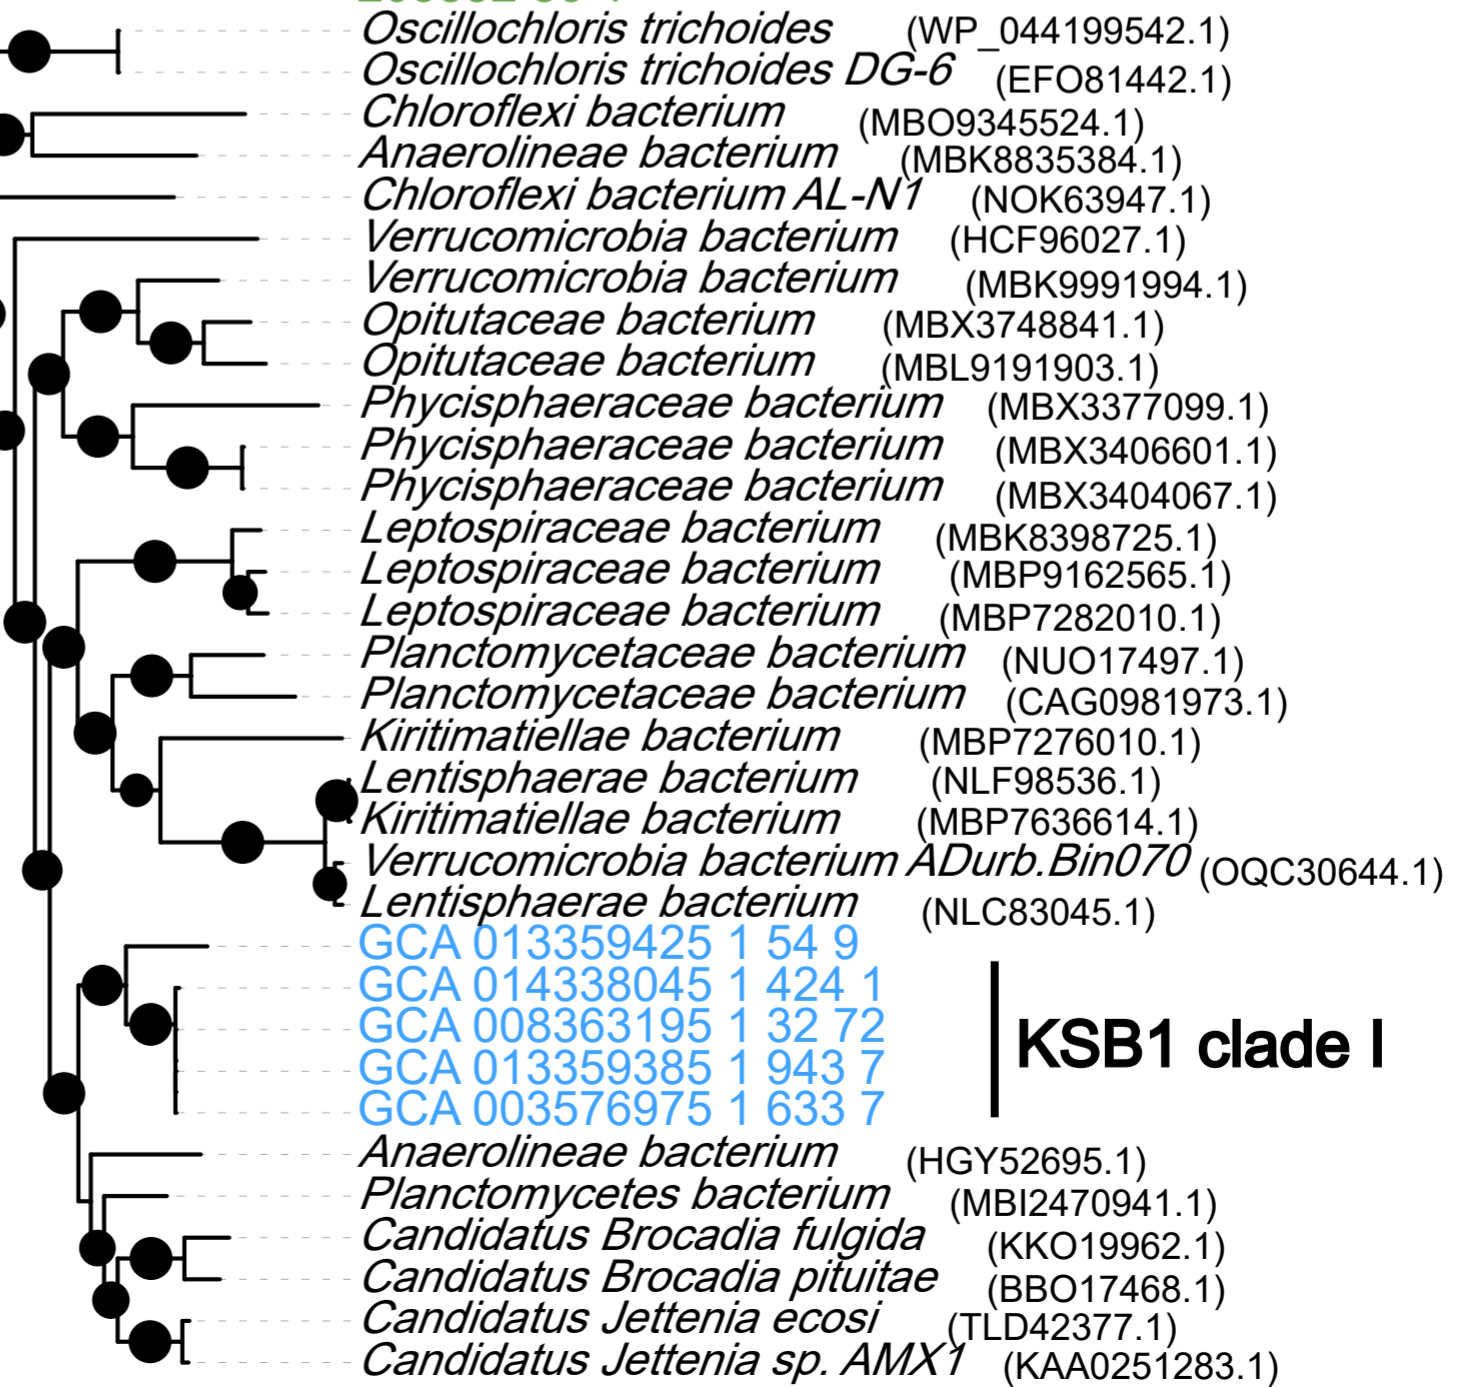**KSB1 clade I**
