# Supplementary material for: Phylogeny, distribution and potential metabolism of candidate bacterial phylum KSB1
Source: PeerJ journal article supplement (doi:10.7717/peerj.13241), 2022-04-12

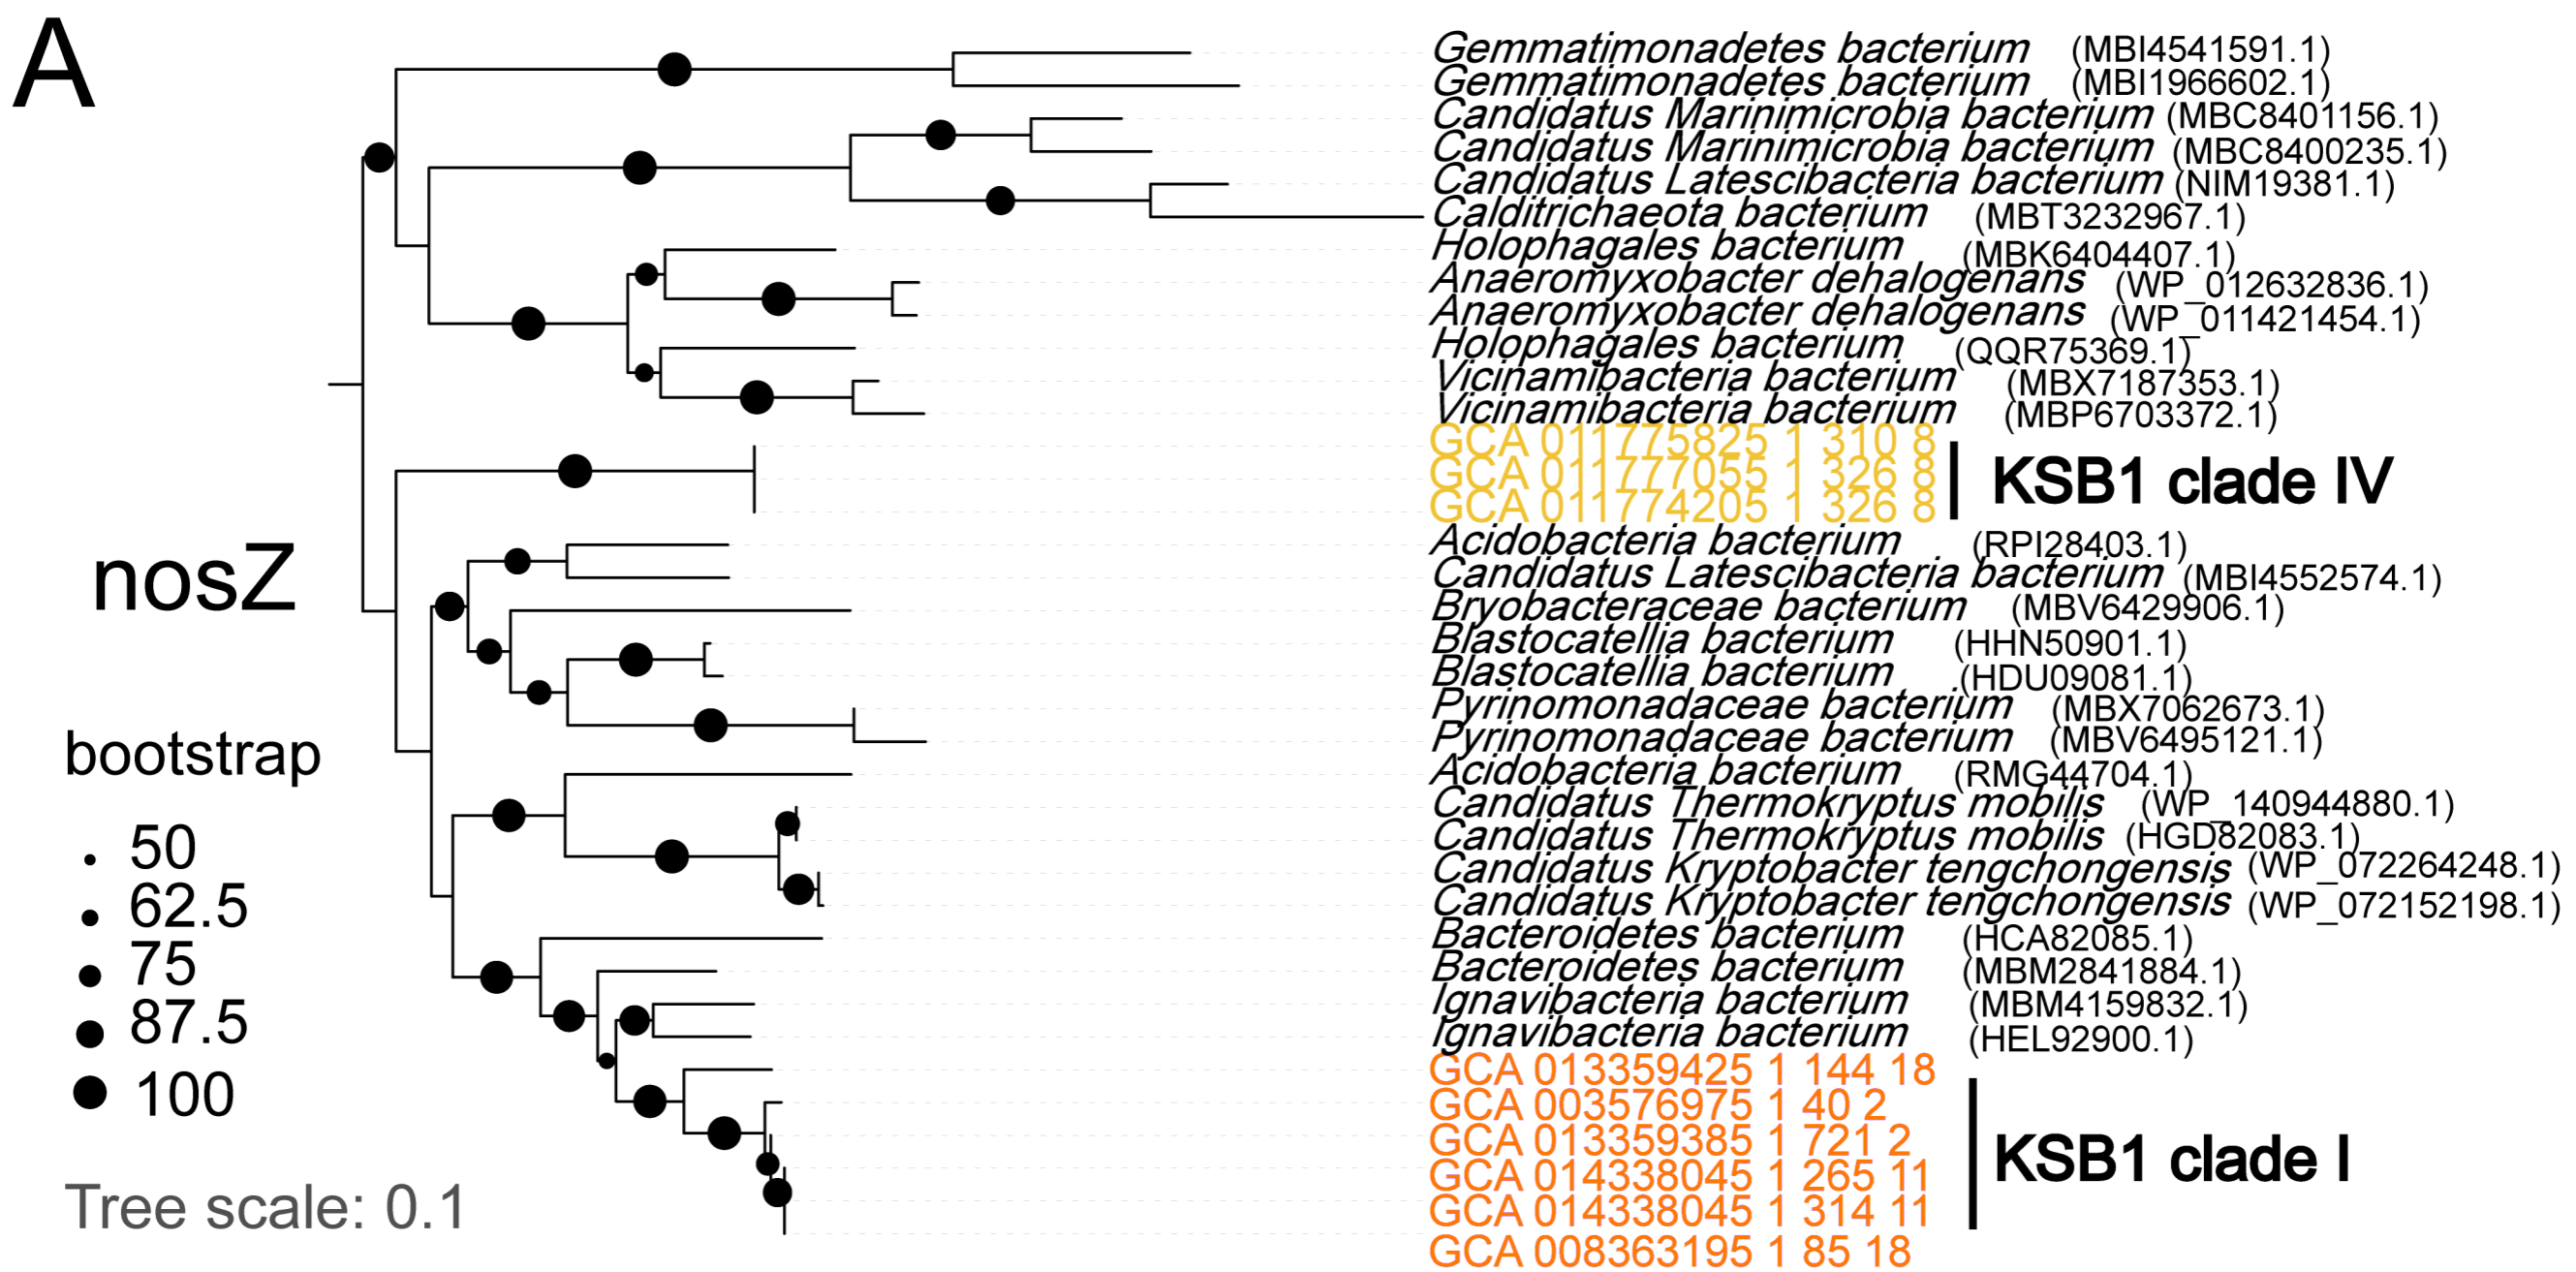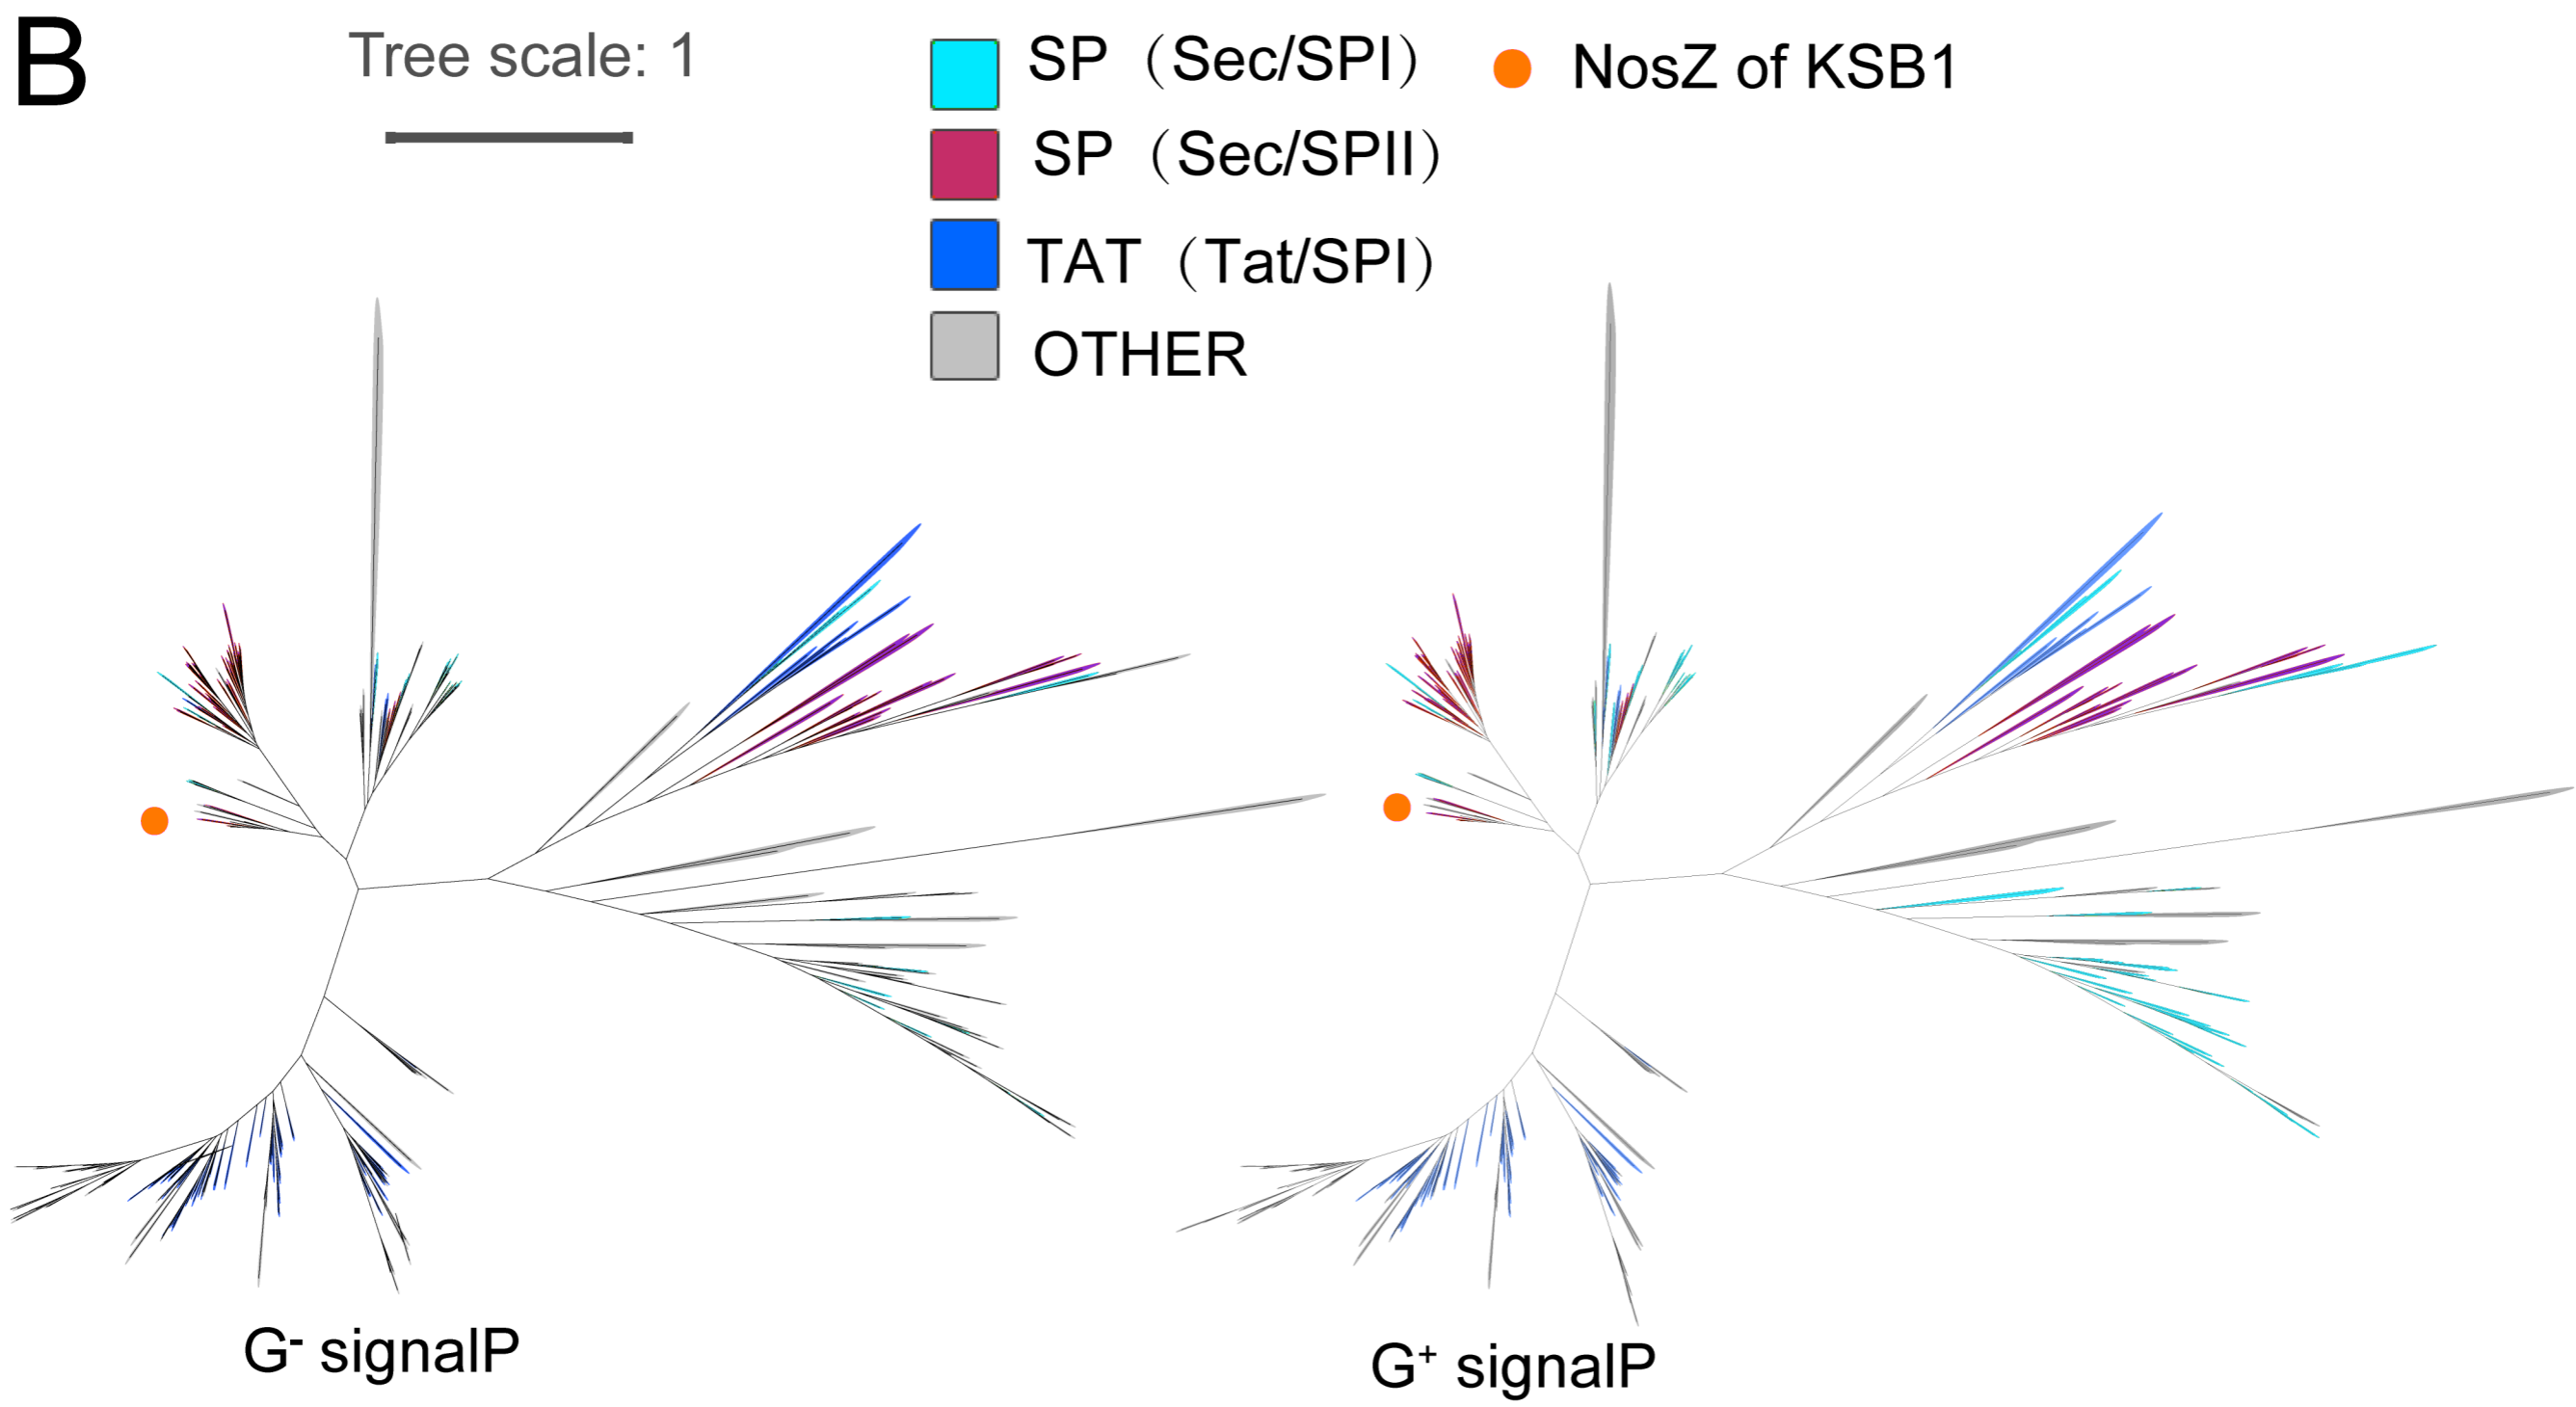

Supplement: Fig_S4.pdf [file Fig_S4.pdf]
