# Supplementary material for: Phylogeny, distribution and potential metabolism of candidate bacterial phylum KSB1
Source: PeerJ. 2022 Apr 12;10:e13241. doi: 10.7717/peerj.13241 (PMC9012183; doi:10.7717/peerj.13241)
Supplement: Supplemental Information 1 [file peerj-10-13241-s001.xlsx]

## Sheet: all database KSB1 searched
GTDB (26)	ID	NCBI Organism Name	NCBI Taxonomy	GTDB Taxonomy
	GCA_001771235.1	candidate division KSB1 bacterium RBG_16_48_16	d__Bacteria; p__; c__; o__; f__; g__; s__	Undefined (Failed Quality Check)
	GCA_002011685.1	Deferribacteres bacterium JdFR-76	d__Bacteria; p__Deferribacteres; c__Deferribacteres; o__; f__; g__; s__	d__Bacteria; p__KSB1; c__UBA2214; o__JdFR-76; f__JdFR-76; g__JdFR-76; s__JdFR-76 sp002011685
	GCA_002049825.1	candidate division KSB1 bacterium 4484_188	d__Bacteria; p__; c__; o__; f__; g__; s__	d__Bacteria; p__Calditrichota; c__Calditrichia; o__RBG-13-44-9; f__RBG-13-44-9; g__4484-188; s__4484-188 sp002049825
	GCA_002084535.1	candidate division KSB1 bacterium 4572_119	d__Bacteria; p__; c__; o__; f__; g__; s__	d__Bacteria; p__KSB1; c__UBA2214; o__AABM5-25-91; f__AABM5-25-91; g__NBLI01; s__NBLI01 sp002084535
	GCA_002085035.1	candidate division KSB1 bacterium 4484_219	d__Bacteria; p__; c__; o__; f__; g__; s__	d__Bacteria; p__KSB1; c__UBA2214; o__JdFR-76; f__4484-219; g__4484-219; s__4484-219 sp002085035
	GCA_002085355.1	candidate division KSB1 bacterium 4484_87	d__Bacteria; p__; c__; o__; f__; g__; s__	d__Bacteria; p__KSB1; c__UBA2214; o__AABM5-25-91; f__AABM5-25-91; g__4484-87; s__4484-87 sp002085355
	GCA_002327255.1	bacterium UBA2214	d__Bacteria; p__; c__; o__; f__; g__; s__	d__Bacteria; p__KSB1; c__UBA2214; o__UBA2214; f__UBA2214; g__UBA2214; s__UBA2214 sp002327255
	GCA_002898015.1	bacterium BMS3Bbin03	d__Bacteria; p__; c__; o__; f__; g__; s__	d__Bacteria; p__KSB1; c__UBA2214; o__JdFR-76; f__BMS3Abin05; g__BMS3Abin05; s__BMS3Abin05 sp002898015
	GCA_002898095.1	bacterium BMS3Abin05	d__Bacteria; p__; c__; o__; f__; g__; s__	d__Bacteria; p__KSB1; c__UBA2214; o__JdFR-76; f__BMS3Abin05; g__BMS3Abin05; s__BMS3Abin05 sp002898015
	GCA_003576975.1	candidate division KSB1 bacterium	d__Bacteria; p__; c__; o__; f__; g__; s__	d__Bacteria; p__KSB1; c__UBA2214; o__CR04bin15; f__QEVD01; g__QEVD01; s__QEVD01 sp003576975
	GCA_003644765.1	candidate division KSB1 bacterium	d__Bacteria; p__; c__; o__; f__; g__; s__	d__Bacteria; p__KSB1; c__UBA2214; o__JdFR-76; f__4484-219; g__4484-219; s__4484-219 sp002085035
	GCA_003644775.1	candidate division KSB1 bacterium	d__Bacteria; p__; c__; o__; f__; g__; s__	d__Bacteria; p__KSB1; c__UBA2214; o__JdFR-76; f__4484-219; g__4484-219; s__4484-219 sp002085035
	GCA_003644785.1	candidate division KSB1 bacterium	d__Bacteria; p__; c__; o__; f__; g__; s__	d__Bacteria; p__KSB1; c__UBA2214; o__JdFR-76; f__4484-219; g__4484-219; s__4484-219 sp002085035
	GCA_003644825.1	candidate division KSB1 bacterium	d__Bacteria; p__; c__; o__; f__; g__; s__	d__Bacteria; p__SM23-31; c__SM23-31; o__SM23-31; f__B21-G16; g__B21-G16; s__B21-G16 sp003644825
	GCA_003645915.1	candidate division KSB1 bacterium	d__Bacteria; p__; c__; o__; f__; g__; s__	d__Bacteria; p__SM23-31; c__SM23-31; o__QNDG01; f__QNDG01; g__QNDG01; s__QNDG01 sp003645915
	GCA_003645925.1	candidate division KSB1 bacterium	d__Bacteria; p__; c__; o__; f__; g__; s__	Undefined (Failed Quality Check)
	GCA_003645965.1	candidate division KSB1 bacterium	d__Bacteria; p__; c__; o__; f__; g__; s__	d__Bacteria; p__KSB1; c__UBA2214; o__JdFR-76; f__4484-219; g__4484-219; s__4484-219 sp003645965
	GCA_003650235.1	candidate division KSB1 bacterium	d__Bacteria; p__; c__; o__; f__; g__; s__	Undefined (Failed Quality Check)
	GCA_003818595.1	Calditrichaeota bacterium	d__Bacteria; p__Calditrichaeota; c__; o__; f__; g__; s__	d__Bacteria; p__KSB1; c__UBA2214; o__UBA2214; f__Zgenome-0027; g__RPQV01; s__RPQV01 sp003818595
	GCA_003818605.1	candidate division KSB1 bacterium	d__Bacteria; p__; c__; o__; f__; g__; s__	d__Bacteria; p__AABM5-125-24; c__RPQS01; o__RPQS01; f__RPQS01; g__RPQS01; s__RPQS01 sp003818605
	GCA_003854975.1	candidate division KSB1 bacterium	d__Bacteria; p__; c__; o__; f__; g__; s__	d__Bacteria; p__KSB1; c__UBA2214; o__UBA2214; f__Zgenome-0027; g__Zgenome-0027; s__Zgenome-0027 sp003854975
	GCA_003854995.1	candidate division KSB1 bacterium	d__Bacteria; p__; c__; o__; f__; g__; s__	d__Bacteria; p__KSB1; c__UBA2214; o__UBA2214; f__Zgenome-0027; g__Zgenome-0027; s__Zgenome-0027 sp003854995
	GCA_004356135.1	Caldithrix sp.	d__Bacteria; p__Calditrichaeota; c__Calditrichae; o__Calditrichales; f__Calditrichaceae; g__Caldithrix; s__	d__Bacteria; p__KSB1; c__UBA2214; o__CR04bin15; f__CR04bin15; g__N075bin58; s__N075bin58 sp004356825
	GCA_004356185.1	Caldithrix sp.	d__Bacteria; p__Calditrichaeota; c__Calditrichae; o__Calditrichales; f__Calditrichaceae; g__Caldithrix; s__	d__Bacteria; p__KSB1; c__UBA2214; o__CR04bin15; f__CR04bin15; g__N075bin58; s__N075bin58 sp004356825
	GCA_004356825.1	Caldithrix sp.	d__Bacteria; p__Calditrichaeota; c__Calditrichae; o__Calditrichales; f__Calditrichaceae; g__Caldithrix; s__	d__Bacteria; p__KSB1; c__UBA2214; o__CR04bin15; f__CR04bin15; g__N075bin58; s__N075bin58 sp004356825
	GCA_004357015.1	Caldithrix sp.	d__Bacteria; p__Calditrichaeota; c__Calditrichae; o__Calditrichales; f__Calditrichaceae; g__Caldithrix; s__	d__Bacteria; p__KSB1; c__UBA2214; o__CR04bin15; f__CR04bin15; g__CR04bin15; s__CR04bin15 sp004357015
NCBI assembly (32)	GenBank Assembly ID (Accession.version)	GenBank release ID
	GCA_008363195.1	13699188
	GCA_003854975.1	7974388
	GCA_014728085.1	22286428
	GCA_014728115.1	22286448
	GCA_013359425.1	20110558
	GCA_013202295.1	19793078
	GCA_003818605.1	7910078
	GCA_014381395.1	21889288
	GCA_003576975.1	7463178
	GCA_014338045.1	21843268
	GCA_011774785.1	18140788
	GCA_013359385.1	20110538
	GCA_011775825.1	18141828
	GCA_011774205.1	18140208
	GCA_011777055.1	18143058
	GCA_011775215.1	18141248
	GCA_011776715.1	18142728
	GCA_011775535.1	18141588
	GCA_011776485.1	18142488
	GCA_011776195.1	18142208
	GCA_003854995.1	7974398
	GCA_011774805.1	18140808
	GCA_003644775.1	7572248
	GCA_003645925.1	7573408
	GCA_013361015.1	20112088
	GCA_014729735.1	22288068
	GCA_003644765.1	7572228
	GCA_003644825.1	7572308
	GCA_003644785.1	7572268
	GCA_003645965.1	7573468
	GCA_003645915.1	7573388
	GCA_003650235.1	7577748
NCBI genome (29)	#Organism Name	Organism Groups	Strain	BioSample	BioProject	Assembly	Level	Size(Mb)	GC%	Replicons	WGS	Scaffolds	CDS	Release Date	GenBank FTP	RefSeq FTP
	candidate division KSB1 bacterium	Bacteria;Bacteria incertae sedis;Bacteria candidate phyla	KSB	SAMN10275039	PRJNA497991	GCA_008363195.1	Scaffold	7.15942	53		RHKO01	128	5857	2019-09-09T00:00:00Z	ftp://ftp.ncbi.nlm.nih.gov/genomes/all/GCA/008/363/195/GCA_008363195.1_ASM836319v1
	candidate division KSB1 bacterium	Bacteria;Bacteria incertae sedis;Bacteria candidate phyla	Zgenome_0048	SAMN10336780	PRJNA498893	GCA_003854975.1	Contig	5.41786	46.8		RQOH01	305	4147	2018-12-01T00:00:00Z	ftp://ftp.ncbi.nlm.nih.gov/genomes/all/GCA/003/854/975/GCA_003854975.1_ASM385497v1
	candidate division KSB1 bacterium	Bacteria;Bacteria incertae sedis;Bacteria candidate phyla	MAG_40	SAMN14239049	PRJNA601861	GCA_013359425.1	Contig	7.0526	59.3		JABWBW01	303	5546	2020-06-18T00:00:00Z	ftp://ftp.ncbi.nlm.nih.gov/genomes/all/GCA/013/359/425/GCA_013359425.1_ASM1335942v1
	candidate division KSB1 bacterium	Bacteria;Bacteria incertae sedis;Bacteria candidate phyla	bin.322	SAMN14944625	PRJNA616293	GCA_013202295.1	Contig	5.14902	44.1		JABMRT01	303	4248	2020-06-01T00:00:00Z	ftp://ftp.ncbi.nlm.nih.gov/genomes/all/GCA/013/202/295/GCA_013202295.1_ASM1320229v1
	candidate division KSB1 bacterium	Bacteria;Bacteria incertae sedis;Bacteria candidate phyla	metabat2.380	SAMN10417387	PRJNA330672	GCA_003818605.1	Contig	3.22872	53.5		RPQS01	253	2657	2018-11-25T00:00:00Z	ftp://ftp.ncbi.nlm.nih.gov/genomes/all/GCA/003/818/605/GCA_003818605.1_ASM381860v1
	candidate division KSB1 bacterium	Bacteria;Bacteria incertae sedis;Bacteria candidate phyla	NIOZ-UU9	SAMN15784338	PRJNA649215	GCA_014381395.1	Scaffold	8.46049	37.1		JACNLT01	783	7093	2020-09-01T00:00:00Z	ftp://ftp.ncbi.nlm.nih.gov/genomes/all/GCA/014/381/395/GCA_014381395.1_ASM1438139v1
	candidate division KSB1 bacterium	Bacteria;Bacteria incertae sedis;Bacteria candidate phyla	KSB	SAMN08931212	PRJNA450161	GCA_003576975.1	Scaffold	7.24847	52.9		QEVD01	776	6402	2018-09-19T00:00:00Z	ftp://ftp.ncbi.nlm.nih.gov/genomes/all/GCA/003/576/975/GCA_003576975.1_ASM357697v1
	candidate division KSB1 bacterium	Bacteria;Bacteria incertae sedis;Bacteria candidate phyla	CDK1	SAMN09714637	PRJNA482907	GCA_014338045.1	Scaffold	6.96064	53		QUCB01	868	6239	2020-08-31T00:00:00Z	ftp://ftp.ncbi.nlm.nih.gov/genomes/all/GCA/014/338/045/GCA_014338045.1_ASM1433804v1
	candidate division KSB1 bacterium	Bacteria;Bacteria incertae sedis;Bacteria candidate phyla	KS3-K005	SAMN13684323	PRJNA598416	GCA_011774785.1	Scaffold	5.81985	47.2		JAACAM01	507	5157	2020-03-30T00:00:00Z	ftp://ftp.ncbi.nlm.nih.gov/genomes/all/GCA/011/774/785/GCA_011774785.1_ASM1177478v1
	candidate division KSB1 bacterium	Bacteria;Bacteria incertae sedis;Bacteria candidate phyla	MAG_41	SAMN14239050	PRJNA601861	GCA_013359385.1	Contig	7.04565	53.3		JABWBX01	1079	6436	2020-06-18T00:00:00Z	ftp://ftp.ncbi.nlm.nih.gov/genomes/all/GCA/013/359/385/GCA_013359385.1_ASM1335938v1
	candidate division KSB1 bacterium	Bacteria;Bacteria incertae sedis;Bacteria candidate phyla	CS3-K085	SAMN13684269	PRJNA598416	GCA_011775825.1	Scaffold	6.03428	47		JAABYK01	712	5634	2020-03-30T00:00:00Z	ftp://ftp.ncbi.nlm.nih.gov/genomes/all/GCA/011/775/825/GCA_011775825.1_ASM1177582v1
	candidate division KSB1 bacterium	Bacteria;Bacteria incertae sedis;Bacteria candidate phyla	KS4-K089	SAMN13684352	PRJNA598416	GCA_011774205.1	Scaffold	6.33703	47		JAACBP01	811	6004	2020-03-30T00:00:00Z	ftp://ftp.ncbi.nlm.nih.gov/genomes/all/GCA/011/774/205/GCA_011774205.1_ASM1177420v1
	candidate division KSB1 bacterium	Bacteria;Bacteria incertae sedis;Bacteria candidate phyla	ACK-K089	SAMN13684207	PRJNA598416	GCA_011777055.1	Scaffold	6.33703	47		JAABWA01	811	6003	2020-03-30T00:00:00Z	ftp://ftp.ncbi.nlm.nih.gov/genomes/all/GCA/011/777/055/GCA_011777055.1_ASM1177705v1
	candidate division KSB1 bacterium	Bacteria;Bacteria incertae sedis;Bacteria candidate phyla	KS1-K080	SAMN13684299	PRJNA598416	GCA_011775215.1	Scaffold	6.24885	46.8		JAABZO01	888	5975	2020-03-30T00:00:00Z	ftp://ftp.ncbi.nlm.nih.gov/genomes/all/GCA/011/775/215/GCA_011775215.1_ASM1177521v1
	candidate division KSB1 bacterium	Bacteria;Bacteria incertae sedis;Bacteria candidate phyla	A-K087	SAMN13684223	PRJNA598416	GCA_011776715.1	Scaffold	6.64654	46.9		JAABWQ01	937	6310	2020-03-30T00:00:00Z	ftp://ftp.ncbi.nlm.nih.gov/genomes/all/GCA/011/776/715/GCA_011776715.1_ASM1177671v1
	candidate division KSB1 bacterium	Bacteria;Bacteria incertae sedis;Bacteria candidate phyla	CS4-K069	SAMN13684284	PRJNA598416	GCA_011775535.1	Scaffold	6.52352	46.8		JAABYZ01	925	6200	2020-03-30T00:00:00Z	ftp://ftp.ncbi.nlm.nih.gov/genomes/all/GCA/011/775/535/GCA_011775535.1_ASM1177553v1
	candidate division KSB1 bacterium	Bacteria;Bacteria incertae sedis;Bacteria candidate phyla	CS1-K065	SAMN13684237	PRJNA598416	GCA_011776485.1	Scaffold	6.58193	46.8		JAABXE01	951	6254	2020-03-30T00:00:00Z	ftp://ftp.ncbi.nlm.nih.gov/genomes/all/GCA/011/776/485/GCA_011776485.1_ASM1177648v1
	candidate division KSB1 bacterium	Bacteria;Bacteria incertae sedis;Bacteria candidate phyla	CS2-K093	SAMN13684251	PRJNA598416	GCA_011776195.1	Scaffold	6.62872	46.6		JAABXS01	1019	6400	2020-03-30T00:00:00Z	ftp://ftp.ncbi.nlm.nih.gov/genomes/all/GCA/011/776/195/GCA_011776195.1_ASM1177619v1
	candidate division KSB1 bacterium	Bacteria;Bacteria incertae sedis;Bacteria candidate phyla	Zgenome_0027	SAMN10336779	PRJNA498893	GCA_003854995.1	Contig	3.5412	52.6		RQOI01	661	3033	2018-12-01T00:00:00Z	ftp://ftp.ncbi.nlm.nih.gov/genomes/all/GCA/003/854/995/GCA_003854995.1_ASM385499v1
	candidate division KSB1 bacterium	Bacteria;Bacteria incertae sedis;Bacteria candidate phyla	KS2-K090	SAMN13684318	PRJNA598416	GCA_011774805.1	Scaffold	6.60238	46.7		JAACAH01	991	6354	2020-03-30T00:00:00Z	ftp://ftp.ncbi.nlm.nih.gov/genomes/all/GCA/011/774/805/GCA_011774805.1_ASM1177480v1
	candidate division KSB1 bacterium	Bacteria;Bacteria incertae sedis;Bacteria candidate phyla	B47_G9	SAMN09215247	PRJNA362212	GCA_003644775.1	Contig	2.78018	42.8		QNDF01	434	2570	2018-10-15T00:00:00Z	ftp://ftp.ncbi.nlm.nih.gov/genomes/all/GCA/003/644/775/GCA_003644775.1_ASM364477v1
	candidate division KSB1 bacterium	Bacteria;Bacteria incertae sedis;Bacteria candidate phyla	B39_G1	SAMN09214810	PRJNA362212	GCA_003645925.1	Contig	3.22764	42.3		QNDI01	598	3011	2018-10-15T00:00:00Z	ftp://ftp.ncbi.nlm.nih.gov/genomes/all/GCA/003/645/925/GCA_003645925.1_ASM364592v1
	candidate division KSB1 bacterium	Bacteria;Bacteria incertae sedis;Bacteria candidate phyla	MAG_5	SAMN14239014	PRJNA601861	GCA_013361015.1	Scaffold	6.48192	53.9		JABWAN01	1165	6037	2020-06-18T00:00:00Z	ftp://ftp.ncbi.nlm.nih.gov/genomes/all/GCA/013/361/015/GCA_013361015.1_ASM1336101v1
	candidate division KSB1 bacterium	Bacteria;Bacteria incertae sedis;Bacteria candidate phyla	B7_G2	SAMN09215072	PRJNA362212	GCA_003644765.1	Contig	2.64833	43.2		QNDE01	496	2467	2018-10-15T00:00:00Z	ftp://ftp.ncbi.nlm.nih.gov/genomes/all/GCA/003/644/765/GCA_003644765.1_ASM364476v1
	candidate division KSB1 bacterium	Bacteria;Bacteria incertae sedis;Bacteria candidate phyla	B21_G16	SAMN09214953	PRJNA362212	GCA_003644825.1	Contig	2.48355	33.7		QNDJ01	493	2120	2018-10-15T00:00:00Z	ftp://ftp.ncbi.nlm.nih.gov/genomes/all/GCA/003/644/825/GCA_003644825.1_ASM364482v1
	candidate division KSB1 bacterium	Bacteria;Bacteria incertae sedis;Bacteria candidate phyla	B39_G15	SAMN09214887	PRJNA362212	GCA_003644785.1	Contig	2.2653	42.6		QNDH01	453	2101	2018-10-15T00:00:00Z	ftp://ftp.ncbi.nlm.nih.gov/genomes/all/GCA/003/644/785/GCA_003644785.1_ASM364478v1
	candidate division KSB1 bacterium	Bacteria;Bacteria incertae sedis;Bacteria candidate phyla	B19_G16	SAMN09214952	PRJNA362212	GCA_003645965.1	Contig	2.42029	43		QNDK01	508	2314	2018-10-15T00:00:00Z	ftp://ftp.ncbi.nlm.nih.gov/genomes/all/GCA/003/645/965/GCA_003645965.1_ASM364596v1
	candidate division KSB1 bacterium	Bacteria;Bacteria incertae sedis;Bacteria candidate phyla	B43_G9	SAMN09215246	PRJNA362212	GCA_003645915.1	Contig	2.4568	36.9		QNDG01	516	2431	2018-10-15T00:00:00Z	ftp://ftp.ncbi.nlm.nih.gov/genomes/all/GCA/003/645/915/GCA_003645915.1_ASM364591v1
	candidate division KSB1 bacterium	Bacteria;Bacteria incertae sedis;Bacteria candidate phyla	B41_G9	SAMN09215245	PRJNA362212	GCA_003650235.1	Contig	2.53197	43.6		QMOM01	598	2445	2018-10-15T00:00:00Z	ftp://ftp.ncbi.nlm.nih.gov/genomes/all/GCA/003/650/235/GCA_003650235.1_ASM365023v1
JGI (2)	IMG submission ID
	203852
	203742
published (14)	ID	source_link	name	accession_number
	GCA_001771235.1	https://doi.org/10.1038/ncomms13219	GCA_001771235.1_ASM177123v1_genomic	GCA_001771235.1
	GCA_003818605.1	https://doi.org/10.1128/AEM.00189-19	GCA_003818605.1_ASM381860v1	GCA_003818605.1
	Hydre.4484_188	https://doi.org/10.1038/s41467-018-07418-0	4484_188	GCA_002049825.1
	Hydre.4484_219		4484_219	GCA_002085035.1
	Hydre.4484_87		4484_87	GCA_002085355.1
	Hydre.4572_119		4572_119	GCA_002084535.1
	Hydre.B19_G16		B19_G16	GCA_003645965.1
	Hydre.B21_G16		B21_G16	GCA_003644825.1
	Hydre.B39_G15		B39_G15	GCA_003644785.1
	Hydre.B39_G1		B39_G1	GCA_003645925.1
	Hydre.B41_G9		B41_G9	GCA_003650235.1
	Hydre.B43_G9		B43_G9	GCA_003645915.1
	Hydre.B47_G9		B47_G9	GCA_003644775.1
	Hydre.B7_G2		B7_G2	GCA_003644765.1
assembled by our Lab (15)	MAG ID
	B3T3L14
	B23T1B10
	B24T1B10
	B1D1T1
	B70T1B8
	B77T1B5
	B13T1L6
	B4MC02
	B15T1B3
	B16T1L6
	B79T1L10
	B11D1T2
	vent-23
	vent-21
	vent-69

## Sheet: 44 KSB1 MAGs analysis further
MAG_ID	Completeness	Contamination	QS	environment	clade
GCA_003576975.1	92.24	3.3	75.74	bioreactor	cladeⅠ
GCA_008363195.1	94.44	1.1	88.94	bioreactor	cladeⅠ
GCA_013359385.1	88.4	1.1	82.9	bioreactor	cladeⅠ
GCA_013359425.1	95.54	2.2	84.54	bioreactor	cladeⅠ
GCA_013361015.1	73.45	1.1	67.95	bioreactor	cladeⅠ
GCA_014338045.1	91.14	1.65	82.89	bioreactor	cladeⅠ
GCA_002011685.1	77.89	0.28	76.49	hydrothermal vent	cladeⅡ
GCA_002085035.1	64.6	1.1	59.1	hydrothermal vent	cladeⅡ
GCA_002898015.1	98.84	1.1	93.34	hydrothermal vent	cladeⅡ
GCA_002898095.1	93.59	1.1	88.09	hydrothermal vent	cladeⅡ
GCA_003644765.1	85.43	3.3	68.93	hydrothermal vent	cladeⅡ
GCA_003644775.1	93.96	5.04	68.76	hydrothermal vent	cladeⅡ
GCA_003644785.1	76.12	1.2	70.12	hydrothermal vent	cladeⅡ
GCA_003645965.1	77.77	0.55	75.02	hydrothermal vent	cladeⅡ
B3T3L14	97.8	0	97.8	marine sediment	cladeⅡ
B23T1B10	93.41	4.46	71.11	marine sediment	cladeⅡ
vent-69	96.64	1.1	91.14	hydrothermal vent	cladeⅡ
203742	97.67	2.56	84.87	anaerobic digester	cladeⅢ
203852	90.21	1.2	84.21	anaerobic digester	cladeⅢ
GCA_001771235.1	85.1	0	85.1	rifle background sediment	cladeⅢ
GCA_002084535.1	58.13	1.1	52.63	hydrothermal vent	cladeⅢ
GCA_002085355.1	72.53	1.16	66.73	hydrothermal vent	cladeⅢ
GCA_002327255.1	89.56	2.75	75.81	tailing pond	cladeⅢ
GCA_003818595.1	86.22	4.64	63.02	wetland sediments	cladeⅢ
GCA_003854975.1	90.05	6.59	57.1	freshwater sediment	cladeⅢ
GCA_003854995.1	75.76	3.3	59.26	freshwater sediment	cladeⅢ
GCA_014728085.1	95.54	2.2	84.54	hypersaline water microbial mat	cladeⅢ
GCA_014728115.1	95.54	4.4	73.54	hypersaline water microbial mat	cladeⅢ
GCA_014729735.1	84.73	4.86	60.43	hypersaline water microbial mat	cladeⅢ
GCA_004356135.1	82.35	4.4	60.35	marine sediment	cladeⅣ
GCA_004356185.1	76.31	4.4	54.31	marine sediment	cladeⅣ
GCA_004356825.1	94.44	3.3	77.94	marine sediment	cladeⅣ
GCA_004357015.1	66.87	2.26	55.57	marine sediment	cladeⅣ
GCA_011774205.1	83.94	4.69	60.49	marine sediment	cladeⅣ
GCA_011775825.1	83.94	5.98	54.04	marine sediment	cladeⅣ
GCA_011777055.1	83.94	4.69	60.49	marine sediment	cladeⅣ
B11D1T2	87.45	4.95	62.7	marine sediment	cladeⅣ
B13T1L6	94.99	7.14	59.29	marine sediment	cladeⅣ
B16T1L6	76.69	0	76.69	marine sediment	cladeⅣ
B24T1B10	75.94	2.26	64.64	marine sediment	cladeⅣ
B4MC02	95.54	6.59	62.59	marine sediment	cladeⅣ
B70T1B8	95.54	7.41	58.49	marine sediment	cladeⅣ
B77T1B5	96.64	6.04	66.44	marine sediment	cladeⅣ
B79T1L10	85.65	4.68	62.25	marine sediment	cladeⅣ

## Sheet: 39 markers for KSB1 tree 
Unique copy marker protein ID	MAGs number containing the protein
TIGR00029	44
TIGR00392	43
TIGR00095	43
PF00380.14	43
TIGR01128	42
TIGR01011	42
TIGR00615	42
TIGR00116	42
TIGR00059	42
TIGR03725	41
TIGR02729	41
TIGR02075	41
TIGR01302	41
TIGR01164	41
TIGR01071	41
TIGR01044	41
TIGR01032	41
TIGR01021	41
TIGR01009	41
TIGR00496	41
TIGR00084	41
TIGR00083	41
TIGR00061	41
TIGR00019	41
TIGR01953	40
TIGR01510	40
TIGR01391	40
TIGR01171	40
TIGR01066	40
TIGR00635	40
TIGR00456	40
TIGR00435	40
TIGR00431	40
TIGR00416	40
TIGR00398	40
TIGR00064	40
TIGR00020	40
TIGR00006	40
PF00410.14	40
