# Supplementary material for: Phylogeny, distribution and potential metabolism of candidate bacterial phylum KSB1
Source: PeerJ. 2022 Apr 12;10:e13241. doi: 10.7717/peerj.13241 (PMC9012183; doi:10.7717/peerj.13241)
Supplement: Supplemental Information 2 [file peerj-10-13241-s002.xlsx]

## Sheet: genomes used for KSB1 to FCB 
MAGs	Phylum	Data_source	Identify again of FCB in GTDB
GCA_000005845.2	Proteobacteria	GTDB
GCF_003018335.1
GCF_000690815.1
GCF_000026325.1
GCA_000024525.1	bacteroidetes (FCB superphylum)	GTDB	Yes
GCA_000210075.1	bacteroidetes (FCB superphylum)		Yes
GCA_000263195.1	bacteroidetes (FCB superphylum)		Yes
GCA_000447245.1	Zixibacteria (FCB superphylum)		Yes
GCA_001303785.1	WOR-3 (FCB superphylum)		Yes
GCA_001508335.1	TA06 (FCB superphylum)		Yes
GCA_001508575.1	TA06 (FCB superphylum)		Yes
GCA_001775395.1	Zixibacteria (FCB superphylum)		Yes
GCA_002085385.1	UBP14 (FCB superphylum)		Yes
GCA_002245415.1	WOR-3 (FCB superphylum)		Yes
GCA_002316275.1	WOR-3 (FCB superphylum)		Yes
GCA_002327905.1	WOR-3 (FCB superphylum)		Yes
GCA_002345865.1	UBP2 (FCB superphylum)		Yes, but given a new phylum name as Edwardsbacteria.However, it was still named as bacterium UBP2_UBA2291 in NCBI
GCA_002346505.1	Latescibacteria (FCB superphylum)		Yes
GCA_002346595.1	Latescibacteria (FCB superphylum)		Yes
GCA_002347155.1	WOR-3 (FCB superphylum)		Yes
GCA_002347565.1	UBP2 (FCB superphylum)		Yes, but given a new phylum name as Edwardsbacteria. However, it was still named as bacterium UBP2_UBA2291 in NCBI
GCA_002363235.1	Hyd24-12 (FCB superphylum)		Yes, but given a new phylum name as Fermentibacterota. However, it was still named as candidate division Hyd24-12 bacterium UBA3253
GCA_002367385.1	WOR-3 (FCB superphylum)		Yes
GCA_002403075.1	UBP1 (FCB superphylum)		Yes, but given a new phylum name as Krumholzibacteriota. However, it was still named as bacterium UBP1_UBA4783 in NCBI.
GCA_002403255.1	WOR-3 (FCB superphylum)		Yes
GCA_002403295.1	UBP1 (FCB superphylum)		Yes, but given a new phylum name as Krumholzibacteriota. However, it was still named as bacterium UBP1_UBA4771 in NCBI.
GCA_002412795.1	UBP2 (FCB superphylum)		Yes, but given a new phylum name as Edwardsbacteria. However, it was still named as bacterium UBP2_UBA5202 IN NCBI.
GCA_002414865.1	Hyd24-12 (FCB superphylum)		Yes, but given a new phylum name as Fermentibacterota. However, it was still named as candidate division Hyd24-12 bacterium UBA5074 in NCBI.
GCA_002421425.1	WOR-3 (FCB superphylum)		Yes
GCA_002428525.1	UBP14 (FCB superphylum)		Yes
GCA_002430795.1	Hyd24-12 (FCB superphylum)		Yes, but given a new phylum name as Fermentibacterota. However, it was still named as candidate division Hyd24-12 bacterium UBA5938 in NCBI.
GCA_002436025.1	Hyd24-12 (FCB superphylum)		Yes, but given a new phylum name as Fermentibacterota.However, it was still named as candidate division Hyd24-12 bacterium UBA6080 in NCBI.
GCA_002441125.1	WOR-3 (FCB superphylum)		Yes
GCA_002479745.1	Hyd24-12 (FCB superphylum)		Yes, but given a new phylum name as Fermentibacterota. However, it was still named as candidate division Hyd24-12 bacterium UBA7474.
GCF_000012485.1	Chlorobi (FCB superphylum)		Yes, but given a new phylum name as Bacteroidota.
GCF_000015125.1	Chlorobi (FCB superphylum)		Yes, but given a new phylum name as Bacteroidota.
GCA_002838945.1	Zixibacteria (FCB superphylum)		Yes
GCF_000146505.1	Fibrobacteres (FCB superphylum)		Yes
GCF_000258405.1	Ignavibacteriae (FCB superphylum)		Yes, but given a new phylum name as Bacteroidota.However, it was still named as Ignavibacterium album JCM 16511 in NCBI.
GCF_000279145.1	Ignavibacteriae (FCB superphylum)		Yes, but given a new phylum name as Bacteroidota.
GCF_000474745.1	Fibrobacteres (FCB superphylum)		Yes
GCF_000522985.1	Gemmatimonadetes (FCB superphylum)		Yes
GCF_000695095.2	Gemmatimonadetes (FCB superphylum)		Yes
GCF_900167415.1	Fibrobacteres (FCB superphylum)		Yes
GCF_000020465.1	Chlorobi (FCB superphylum)		Yes, but given a new phylum name as Bacteroidota.However, it was still named as Chlorobium limicola DSM 245
GCF_000020645.1	Chlorobi (FCB superphylum)		Yes, but given a new phylum name as Bacteroidota.
GCF_000007925.1	cyanobacteria (Therrabacteria superphylum)
GCF_000008205.1	Tenericutes (Therrabacteria superphylum)
GCF_000008305.1	Tenericutes (Therrabacteria superphylum)
GCF_000008365.1	Tenericutes (Therrabacteria superphylum)
GCF_000010065.1	cyanobacteria (Therrabacteria superphylum)
GCF_000010625.1	cyanobacteria (Therrabacteria superphylum)
GCF_000011385.1	cyanobacteria (Therrabacteria superphylum)
GCF_000018785.1	Tenericutes (Therrabacteria superphylum)
GCF_000019345.1	Tenericutes (Therrabacteria superphylum)
GCF_000020025.1	cyanobacteria (Therrabacteria superphylum)
GCF_000025845.1	Tenericutes (Therrabacteria superphylum)
GCF_000027325.1	Tenericutes (Therrabacteria superphylum)
203742	KSB1	public databases
203852
GCA_001771235.1
GCA_002011685.1
GCA_002085355.1
GCA_002327255.1
GCA_002898015.1
GCA_002898095.1
GCA_003576975.1
GCA_003644765.1
GCA_003644775.1
GCA_003644785.1
GCA_003645965.1
GCA_003818595.1
GCA_003854975.1
GCA_003854995.1
GCA_004356135.1
GCA_004356185.1
GCA_004356825.1
GCA_008363195.1
GCA_011774205.1
GCA_011775825.1
GCA_011777055.1
GCA_013359385.1
GCA_013359425.1
GCA_013361015.1
GCA_014338045.1
GCA_014728085.1
GCA_014728115.1
GCA_014729735.1
B11D1T2		our laboratory
B13T1L6
B23T1B10
B24T1B10
B3T3L14
B4MC02
B70T1B8
B77T1B5
B79T1L10
vent-69 (*raw data from PRJNA502671(JGI public))
IMG 2693429801	SAR406 (FCB superphylum)	https://doi.org/10.1016/j.margen.2019.100699
T1B11
IMG 2651870052
IMG 2651870053
IMG 2693429802
D37C17
GCA_002347855.1			Yes
T3L11
T1B10-1
D37C11
T3L1
T3L14
T1B10-2
D37C13
AQSB00000000.1
AQSA00000000.1
AQSI00000000.1
SAMC058290	Candidatus Tianyabacteria (FCB superphylum)	https://doi.org/10.1111/1462-2920.15363
SAMC058291
SAMC058293
SAMC058292
SAMC058295
SAMC058294

## Sheet: 43 conserved proteins of checkM
Pfam Id	Description
PF00164	Ribosomal protein S12/S23
PF00177	Ribosomal protein S7p/S5e
PF00181	Ribosomal proteins L2, RNA binding domain
PF00189	Ribosomal protein S3, C-terminal domain
PF00203	Ribosomal protein S19
PF00237	Ribosomal protein L22p/L17e
PF00238	Ribosomal protein L14p/L23e
PF00252	Ribosomal protein L16p/L10e
PF00276	Ribosomal protein L23
PF00281	Ribosomal protein L5
PF00297	Ribosomal protein L3
PF00298	Ribosomal protein L11, RNA binding domain
PF00312	Ribosomal protein S15
PF00318	Ribosomal protein S2
PF00333	Ribosomal protein S5, N-terminal domain
PF00366	Ribosomal protein S17
PF00380	Ribosomal protein S9/S16
PF00410	Ribosomal protein S8
PF00411	Ribosomal protein S11
PF00466	Ribosomal protein L10
PF00562	RNA polymerase Rpb2, domain 6
PF00572	Ribosomal protein L13
PF00573	Ribosomal protein L4/L1
PF00623	RNA polymerase Rpb1, domain 2
PF00673	Ribosomal protein L5P, C-terminus
PF00687	Ribosomal protein L1p/L10e
PF00831	Ribosomal protein L29
PF00861	Ribosomal protein L18p/L5e
PF01192	RNA polymerase Rpb6
PF01509	TruB family pseudouridylate synthase
PF02978	Signal peptide binding domain
PF03719	Ribosomal protein S5, C-terminal domain
PF03946	Ribosomal protein L11, N-terminal domain
PF03947	Ribosomal Proteins L2, C-terminal domain
PF04560	RNA polymerase Rpb2, domain 7
PF04561	RNA polymerase Rpb2, domain 2
PF04563	RNA polymerase beta subunit
PF04565	RNA polymerase Rpb2, domain 3
PF04997	RNA polymerase Rpb1, domain 1
PF05000	RNA polymerase Rpb1, domain 4
PF11987	Translation-initiation factor 2
TIGR00344	Alanine – tRNA ligases
TIGR00422	Valine – tRNA ligase
