# Supplementary material for: Phylogeny, distribution and potential metabolism of candidate bacterial phylum KSB1
Source: PeerJ. 2022 Apr 12;10:e13241. doi: 10.7717/peerj.13241 (PMC9012183; doi:10.7717/peerj.13241)
Supplement: Supplemental Information 3 [file peerj-10-13241-s003.xlsx]

## Sheet: motive elements KEGG
KEGG	GCA_013361015.1	GCA_013359425.1	GCA_003576975.1	GCA_013359385.1	GCA_008363195.1	GCA_014338045.1	GCA_002011685.1	Marina.B23T1B10	Marina.B3T3L14	vent-69	GCA_002898015.1	GCA_002898095.1	GCA_002085035.1	GCA_003645965.1	GCA_003644765.1	GCA_003644775.1	GCA_003644785.1	GCA_002085355.1	GCA_002084535.1	GCA_014729735.1	GCA_003818595.1	GCA_002327255.1	GCA_014728085.1	GCA_014728115.1	GCA_003854975.1	GCA_003854995.1	GCA_001771235.1	203742	203852	GCA_011775825.1	GCA_011774205.1	GCA_011777055.1	Marina.B16T1L6	GCA_004357015.1	Marina.B13T1L6	GCA_004356135.1	GCA_004356185.1	GCA_004356825.1	Marina.B79T1L10	Marina.B11D1T2	Marina.B77T1B5	Marina.B4MC02	Marina.B24T1B10	Marina.B70T1B8
K07481	0	0	0	0	0	1	0	1	0	2	0	0	0	0	0	0	0	0	0	0	0	0	0	1	0	1	0	1	1	0	0	0	0	1	1	2	0	1	3	2	2	0	0	0	K07481; transposase, IS5 family
K07482	0	0	0	0	0	0	0	0	0	0	0	0	0	0	0	0	0	0	0	0	0	0	0	0	0	0	0	0	0	1	1	1	0	0	2	1	0	0	2	2	1	2	2	0	K07482; transposase, IS30 family
K07483	0	0	1	0	0	1	0	0	0	0	0	0	0	0	0	0	0	1	0	0	0	1	2	2	0	0	0	0	0	0	1	1	0	0	0	0	0	0	2	0	1	1	1	0	K07483; transposase
K07484	3	0	3	2	4	4	0	0	0	1	0	0	0	0	0	0	0	0	0	0	0	0	1	1	2	1	0	1	1	4	5	5	1	0	4	0	0	1	0	1	3	4	0	0	K07484; transposase
K07485	0	0	0	0	1	1	0	1	0	0	1	0	0	0	0	0	0	0	0	0	0	0	0	2	0	0	0	0	0	1	1	1	0	0	0	0	0	0	0	0	0	0	0	0	K07485; transposase
K07486	1	2	1	2	0	0	0	4	2	0	0	0	0	0	0	0	0	1	0	0	1	2	2	3	4	0	1	1	0	5	5	5	0	0	1	0	0	1	2	3	1	3	2	1	K07486; transposase
K07487	0	0	0	0	0	1	0	1	0	0	0	0	0	0	1	0	0	0	0	0	0	0	1	0	0	0	0	1	0	0	0	0	1	0	1	1	0	0	1	3	2	1	2	0	K07487; transposase
K07488	0	0	0	0	0	0	0	0	0	0	0	0	0	0	0	0	0	0	0	0	1	0	0	0	0	0	0	0	0	0	0	0	0	1	0	0	0	0	0	2	1	0	0	0	K07488; transposase
K07491	6	3	6	4	10	9	0	4	4	1	4	2	1	3	2	2	1	0	2	1	2	4	4	8	2	2	1	9	0	5	5	5	5	4	6	1	3	7	9	8	9	7	6	3	K07491; putative transposase
K07492	0	0	3	1	0	2	0	0	0	0	0	0	0	0	0	0	0	0	0	0	0	0	0	0	0	0	0	2	0	0	0	0	0	0	0	0	0	0	0	0	0	0	0	0	K07492; putative transposase
K07493	2	0	0	2	2	0	0	0	0	0	0	0	0	0	0	0	0	0	0	0	1	0	2	1	0	0	0	1	0	0	0	0	1	0	1	0	1	0	1	0	0	0	0	0	K07493; putative transposase
K07494	0	1	1	0	0	1	0	0	0	0	2	0	0	0	0	0	0	0	0	0	0	0	0	0	0	0	0	1	0	1	1	1	1	0	1	0	1	0	1	2	0	1	1	0	K07494; putative transposase
K07495	0	0	1	1	1	2	0	0	0	1	0	1	0	1	0	1	0	0	0	0	0	0	1	2	0	0	0	0	0	4	2	2	0	0	0	0	2	0	0	1	0	1	0	0	K07495; putative transposase
K07496	0	0	0	0	0	0	0	0	0	0	0	0	0	0	0	0	0	0	0	0	0	0	0	0	0	0	0	0	0	0	0	0	0	0	0	0	0	0	0	0	0	0	0	0	K07496; putative transposase
K07497	2	0	1	0	1	1	0	3	2	0	0	0	0	0	2	0	0	1	0	0	2	0	2	2	1	1	1	0	1	2	3	3	1	2	4	1	2	0	5	2	5	4	1	3	K07497; putative transposase
K07498	0	0	0	0	0	0	0	0	0	0	0	0	0	0	0	0	0	0	0	0	0	0	0	0	0	0	0	0	0	0	0	0	0	1	0	0	0	0	0	0	0	0	0	0	K07498; putative transposase
K07499	0	0	0	0	0	1	0	0	0	0	0	0	0	0	0	0	0	0	0	0	0	0	0	0	0	0	0	1	0	0	0	0	0	0	0	0	0	0	0	0	0	0	0	0	K07499; putative transposase
KEGG	GCA_013361015.1	GCA_013359425.1	GCA_003576975.1	GCA_013359385.1	GCA_008363195.1	GCA_014338045.1	GCA_002011685.1	Marina.B23T1B10	Marina.B3T3L14	vent-SRR8439172-69	GCA_002898015.1	GCA_002898095.1	GCA_002085035.1	GCA_003645965.1	GCA_003644765.1	GCA_003644775.1	GCA_003644785.1	GCA_002085355.1	GCA_002084535.1	GCA_014729735.1	GCA_003818595.1	GCA_002327255.1	GCA_014728085.1	GCA_014728115.1	GCA_003854975.1	GCA_003854995.1	GCA_001771235.1	203742	203852	GCA_011775825.1	GCA_011774205.1	GCA_011777055.1	Marina.B16T1L6	GCA_004357015.1	Marina.B13T1L6	GCA_004356135.1	GCA_004356185.1	GCA_004356825.1	Marina.B79T1L10	Marina.B11D1T2	Marina.B77T1B5	Marina.B4MC02	Marina.B24T1B10	Marina.B70T1B8
K09951	1	2	0	2	3	2	3	0	0	3	2	1	1	1	1	2	0	0	0	1	0	0	0	2	1	0	0	2	0	1	1	1	0	0	0	0	0	0	0	0	0	0	0	1	cas2; CRISPR-associated protein Cas2
K07012	0	1	0	1	1	1	1	0	0	1	1	0	0	1	0	0	0	0	0	1	0	0	0	3	1	0	0	1	0	0	0	0	0	0	0	0	0	0	0	0	0	0	0	0	cas3; CRISPR-associated endonuclease/helicase Cas3 [EC:3.1.-.- 3.6.4.-]
K19088	0	0	0	0	0	0	0	0	0	0	1	0	0	1	0	0	0	0	0	0	0	0	0	1	0	0	0	0	0	0	0	0	0	0	0	0	0	0	0	0	0	0	0	0	cst1, cas8a; CRISPR-associated protein Cst1
K19075	0	1	0	1	0	0	0	0	0	0	1	0	0	1	0	0	0	0	0	0	0	0	0	1	0	0	0	0	0	0	0	0	0	0	0	0	0	0	0	0	0	0	0	0	cst2, cas7; CRISPR-associated protein Cst2
K07464	0	1	0	1	1	1	1	0	0	1	1	0	0	1	0	1	0	0	0	1	0	0	0	2	1	0	0	1	0	1	1	1	0	0	0	0	0	0	0	0	0	0	0	0	cas4; CRISPR-associated exonuclease Cas4 [EC:3.1.12.1]
K19090	0	1	0	1	0	0	0	0	0	0	1	0	0	1	0	0	0	0	0	0	0	0	0	1	0	0	0	0	0	0	0	0	0	0	0	0	0	0	0	0	0	0	0	0	cas5t; CRISPR-associated protein Cas5t
K19091	0	1	1	1	1	1	1	0	0	1	1	0	1	0	1	1	0	0	0	2	0	0	0	3	0	0	1	0	0	1	1	1	1	0	0	0	0	0	0	0	0	1	0	0	cas6; CRISPR-associated endoribonuclease Cas6 [EC:3.1.-.-]
K19114	0	0	1	0	1	1	1	0	0	1	0	0	0	0	1	0	0	0	0	1	0	0	0	1	0	0	0	0	0	0	0	0	1	0	0	0	0	0	0	0	0	0	0	0	csh1; CRISPR-associated protein Csh1
K19115	0	0	1	0	1	1	1	0	0	1	0	0	0	0	0	0	0	0	0	1	0	0	0	1	0	0	0	0	0	0	0	0	0	0	0	0	0	0	0	0	0	0	0	0	csh2; CRISPR-associated protein Csh2
K19116	0	0	0	0	1	1	1	0	0	1	0	0	0	0	0	0	0	0	0	1	0	0	0	1	0	0	0	0	0	0	0	0	0	0	0	0	0	0	0	0	0	0	0	0	cas5h; CRISPR-associated protein Cas5h
K19117	0	0	0	0	0	0	0	0	0	0	0	0	0	0	0	0	0	0	0	0	0	0	0	0	1	0	0	1	0	0	0	0	0	0	0	0	0	0	0	0	0	0	0	0	csd1, cas8c; CRISPR-associated protein Csd1
K19118	0	0	0	0	0	0	0	0	0	0	0	0	0	0	0	0	0	0	0	0	0	0	0	0	1	0	0	1	0	0	0	0	0	0	0	0	0	0	0	0	0	0	0	0	csd2, cas7; CRISPR-associated protein Csd2
K19119	0	0	0	0	0	0	0	0	0	0	0	0	0	0	0	0	0	0	0	0	0	0	0	0	1	0	0	1	0	0	0	0	0	0	0	0	0	0	0	0	0	0	0	0	cas5d; CRISPR-associated protein Cas5d
K19123	0	0	0	0	0	0	0	0	0	0	0	0	0	0	0	0	0	0	0	0	0	0	0	1	0	0	0	0	0	0	0	0	0	0	0	0	0	0	0	0	0	0	0	0	casA, cse1; CRISPR system Cascade subunit CasA
K19046	0	0	0	0	0	0	0	0	0	0	0	0	0	0	0	0	0	0	0	0	0	0	0	1	0	0	0	0	0	0	0	0	0	0	0	0	0	0	0	0	0	0	0	0	casB, cse2; CRISPR system Cascade subunit CasB
K19124	0	0	0	0	0	0	0	0	0	0	0	0	0	0	0	0	0	0	0	0	0	0	0	1	0	0	0	0	0	0	0	0	0	0	0	0	0	0	0	0	0	0	0	0	casC, cse4; CRISPR system Cascade subunit CasC
K19125	0	0	0	0	0	0	0	0	0	0	0	0	0	0	0	0	0	0	0	0	0	0	0	1	0	0	0	0	0	0	0	0	0	0	0	0	0	0	0	0	0	0	0	0	casD, cse5; CRISPR system Cascade subunit CasD
K19126	0	0	0	0	0	0	0	0	0	0	0	0	0	0	0	0	0	0	0	0	0	0	0	1	0	0	0	0	0	0	0	0	0	0	0	0	0	0	0	0	0	0	0	0	casE, cse3; CRISPR system Cascade subunit CasE
K19134	0	1	1	1	2	2	0	0	0	0	0	0	0	0	0	0	0	0	0	0	0	0	0	1	0	0	0	0	0	0	0	0	0	0	0	0	0	0	0	0	0	0	0	0	csx10; CRISPR-associated protein Csx10
K19135	1	1	1	2	2	2	1	0	0	0	0	0	0	0	0	0	0	0	0	0	0	0	0	0	0	0	0	0	0	0	0	0	0	0	0	0	0	0	0	0	0	0	0	0	csx14; CRISPR-associated protein Csx14
K09952	0	0	0	0	0	0	0	0	0	0	0	0	0	0	0	0	0	0	0	0	0	0	0	0	0	0	0	0	0	0	0	0	0	0	0	0	0	0	0	0	0	0	0	0	csn1, cas9; CRISPR-associated endonuclease Csn1 [EC:3.1.-.-]
K07016	0	0	0	0	0	0	0	0	0	0	0	0	0	0	0	0	0	0	0	0	0	0	0	1	0	0	0	1	0	2	2	2	0	0	0	0	0	0	0	0	0	0	0	0	csm1, cas10; CRISPR-associated protein Csm1
K19138	0	0	0	0	0	0	0	0	0	0	0	0	0	0	0	0	0	0	0	0	0	0	0	1	0	0	0	1	0	1	1	1	0	0	0	0	0	0	0	0	0	0	0	0	csm2; CRISPR-associated protein Csm2
K09002	0	0	0	1	3	3	0	0	0	0	0	0	0	0	1	0	0	0	0	0	0	0	0	1	0	0	0	1	0	1	1	1	0	0	0	0	0	0	0	0	0	0	0	0	csm3; CRISPR-associated protein Csm3
K19139	0	0	0	0	0	0	0	0	0	0	0	0	0	0	1	0	0	0	0	0	0	0	0	1	0	0	0	1	0	1	1	1	0	0	0	0	0	0	0	0	0	0	0	0	csm4; CRISPR-associated protein Csm4
K19140	0	0	0	0	0	0	0	0	0	0	0	0	0	0	1	0	0	0	0	0	0	0	0	1	0	0	0	1	0	1	1	1	0	0	0	0	0	0	0	0	0	0	0	0	csm5; CRISPR-associated protein Csm5
K07061	0	0	0	0	0	0	1	0	0	0	1	0	0	0	1	0	0	0	0	0	0	0	0	0	0	0	0	0	0	0	0	0	0	0	0	0	0	0	0	0	0	0	0	0	cmr1; CRISPR-associated protein Cmr1
K19076	0	0	0	0	0	0	0	0	0	0	0	0	0	0	0	0	0	0	0	0	0	0	0	1	0	0	0	0	0	0	0	0	0	0	0	0	0	0	0	0	0	0	0	0	cmr2, cas10; CRISPR-associated protein Cmr2
K09127	0	0	0	0	0	0	0	0	0	0	0	0	0	0	0	0	0	0	0	0	0	0	0	1	0	0	0	0	0	0	0	0	0	0	0	0	0	0	0	0	0	0	0	0	cmr3; CRISPR-associated protein Cmr3
K09000	0	0	0	0	0	0	0	0	0	0	0	0	0	0	0	0	0	0	0	0	0	0	0	3	0	0	0	0	0	0	0	0	0	0	0	0	0	0	0	0	0	0	0	0	cmr4; CRISPR-associated protein Cmr4
K19141	0	0	0	0	0	0	1	0	0	0	0	0	0	0	0	0	0	0	0	0	0	0	0	2	0	0	0	0	0	0	0	0	0	0	0	0	0	0	0	0	0	0	0	0	cmr5; CRISPR-associated protein Cmr5
K19142	0	0	0	0	0	0	1	0	0	0	0	0	0	0	0	0	0	0	0	0	0	0	0	2	0	0	0	0	0	0	0	0	0	0	0	0	0	0	0	0	0	0	0	0	cmr6; CRISPR-associated protein Cmr6

## Sheet: motive elements COG
freq	cladeⅠ	cladeⅡ	cladeⅢ	cladeⅣ
COG1943	1	0.909091	0.916667	1	Transposase and inactivated derivatives
COG2801	0.833333	0.454545	0.666667	0.933333	Transposase and inactivated derivatives
COG2826	0	0	0	0.8	Transposase and inactivated derivatives, IS30 family
COG2963	0.5	0.363636	0.416667	0.733333	Transposase and inactivated derivatives
COG3039	0.5	0.636364	0.666667	1	Transposase and inactivated derivatives, IS5 family
COG3293	0.5	0	0.0833333	0	Transposase and inactivated derivatives
COG3316	0.5	0	0.0833333	0.0666667	Transposase and inactivated derivatives
COG3328	0.666667	0	0.333333	0.333333	Transposase and inactivated derivatives
COG3335	0.166667	0	0.25	0.533333	Transposase and inactivated derivatives
COG3385	1	0.545455	0.583333	0.666667	FOG: Transposase and inactivated derivatives
COG3415	0.5	0.272727	0.25	0.733333	Transposase and inactivated derivatives
COG3436	0.5	0	0.166667	0.2	Transposase and inactivated derivatives
COG3464	0.666667	0.181818	0.166667	0.466667	Transposase and inactivated derivatives
COG3547	0.666667	0.272727	0.666667	0.8	Transposase and inactivated derivatives
COG3677	0.166667	0.0909091	0.0833333	0.333333	Transposase and inactivated derivatives
COG4584	0.333333	0.272727	0.333333	0.4	Transposase and inactivated derivatives
COG4644	0.166667	0	0	0.333333	Transposase and inactivated derivatives, TnpA family
COG5421	0.333333	0.272727	0.5	0.533333	Transposase
COG5433	0	0.181818	0.25	0.733333	Transposase

## Sheet: phage_predicted
gi|00000000|ref|NC_000000| Genome; Raw sequence 7159421, gc%: 53.05%
CDS_POSITION BLAST_HIT EVALUE prophage_PRO_SEQ
---------------------------------------------------------------------------------------------------------------------------------------------------------------------------------------
#### region 1, GCA_008363195.1_104 ####
complement(24429..26612) PHAGE_Lactoc_Q54_NC_008364: putative ribonuclease; PP_05299; phage(gi115304286) 5.30e-83 MKDLIDRTLEVLAQQPSRQFKAKELARLLHVPPAKYAEYRSLLRSLAQQGLLAKLRRNHFGHARQTSTVTGKLHVKTQGYGFLIVGEDQEDVFISQKNMRTALNGDLVKVELFARPTGRRAEGRVVEILQRSRSNIVGTLRHGKHFYFVKPDDIKLLRDIYIPEENLNGAKAGQKVAVTIESWEDELQNPEGRVVKVLGFPGEPGVDVLSVAYAFDLPAAFPPEVEHEAEQLAMEITPELLAQRLDLRDRLTFTIDPEDAKDFDDAISMRELENGNIELGVHIAD…
complement(26822..27079) PHAGE_Mannhe_vB_MhS_535AP2_NC_028853: toxin-antitoxin system antitoxin component HicB; PP_05300; phage(gi971749600) 2.36e-06 MQNIYKLPLLLEPQPEGGYTITCPLLPNLITEADSLDQVIPNVADALAALIEAYQDLKKPLPTILQPLQADTTIWTEMLIPARAA
complement(27118..28467) PHAGE_Bacill_SP_15_NC_031245: hypothetical protein; PP_05301; phage(gi100155) 1.43e-23 VSQLMISISGIRGVVGEGLTPEVALTFAQAFGTYCKTGKVVLGRDSRVSGPMLHGAVTAGLLATGCEVVDLGIASTPTTQLATEKQHAAGGIILTASHNPVMWNGMKLLAHDGLFLDGEEGAKVNAIRASRAFALKTWDQLGALRAYNNAVSDHLQAVLSLPYLNVEQIRRRRFKVVADCVNGAGGVIVPQLLDSLGCDVTYLNLEPHGRFPRNPEPTPENLTELGRAVQEHRADIGLAVDPDADRLALVSEKGKPLGEEYTLALAVDFFLRRKKGKVAVNASTSRV…
complement(28623..28877) hypothetical; PP_05302 N/A MKRKSKTDLNDELRPHYDLRHLLPGGVQGKYAERYRAGTNLVLLEPDIAKAFSSDEEVNEALRLVLQMTRIRLDKKRRLQKQKA
complement(29151..30560) PHAGE_Bacill_SP_15_NC_031245: hypothetical protein; PP_05303; phage(gi100155) 4.30e-52 VINSNIFREYDIRGIAETELTDENVALIGKAFATWMLAQGRKRLVVGRDLRLSSNRLRDAMVNAMLGCGVDIIDIGVVPTPTQYFGIIHFEAEGGVMITGSHNPREYNGFKMSKGLRADDGHLSVGAVYGQDIQELYQIIRSNQFATGKGKIEIVTITPEYISAIKQRVKIHKRLKIVVDPGNGCGALFAPDLWEEMGCEVVRLYAEPDGNFPNHLPDPTVMKYIKDLREKVLAEKADLGIGYDGDADRMGIIDNLGRPIFADKLLALFARDTLTRYPGATIVFDVK…
complement(30571..31518) hypothetical; PP_05304 N/A VETNIASAHHLRARQSPQSLYMSMTTSVDVNQPLPQLIRSLSEHFQKAGFPSALAEAEWLLAGILQTRRSELYVERNRVLTVEQQEILKQYYCRRLQREPLQYILQSCEFFGIEFKVNPAVLIPRPETELLVERVITLAQTFKAARIADLGTGSGCLAVSLAKHLPAAKVLAIDISAEALKVAEENAQANGVAQKITFRQADMCASIDAIHSNQFDIVVSNPPYILPAERDELQPEIRDFEPEAALFVEGDGLKFYRCILAFCQRHLKPGGWVACEMASQRSAAIEKLFRESNFASVEIMPDYAGWPRHLTAQKS
complement(31534..32601) PHAGE_Mycoba_Tonenili_NC_031080: hypothetical protein; PP_05305; phage(gi100201) 6.80e-10 MLAKLDKIEKRFEELNALLSSPEVAANPKRLRDTAKERNELEAVVKKYHEYKSLLRSIDDDKRLLTESNDRELHELASVELEELETRLPALEEELKLLLVPRDPSDARNAIMEIRAGTGGDEAGLFAGDLYRMYTRFAERQGWQLEVISSNAQGIGGFKEIIFQINGKDVFGKLKYEGGVHRVQRVPATEQSGRIHTSAASVAVLPEAEEVDIDINMNDLRIDVFRSSGPGGQSVNTTDSAVRITHVPTGLVVQCQDEKSQLKNKTKALRVLRSRLLEIKQNEE…
complement(32603..32809) hypothetical; PP_05306 N/A VTASTLRIDDFVVGGKMQKNMLVTIVDLPPGFQLDGLLGMNFLGKYRFTIEPDTATLILRNIPVKKTK
complement(32987..33238) hypothetical; PP_05307 N/A MRDDLKISEIEEQCNGQWVVVEITKRDRYRNPLRGRLLFNGSDQRKIYQNGRLYREAHPGAELYSFYAGDPIPQGIGVMFAKE
complement(33312..34286) PHAGE_Brevib_Jenst_NC_028805: putative metal-dependent enzyme; PP_05308; phage(gi971744907) 8.55e-09 MAESQLMVGGQAVIEGVMMRTPEMVTVACRRANGSITVLKKPYRSLLARHKFLALPIFRGAIVLIEALVLGMQALTYSGDLVEHDMRPAGNGKEAATPSLPGQRSKSDKIKMGLTLGITLAIGLGIFFYIPLVLTDLTGARSGFWFNLIDGIIRMIFFLGYIALISRIKEIQRVFEYHGAEHKSIFNHEANTELTPENSAAFSRFHPRCGTSFLLIVMVVSIFVFMFLGRPDTVAERLVRLLFIPVIGGVSYELIRLSGAGYRHPFWRTLIAP…
gi|00000000|ref|NC_000000| Genome; Raw sequence 7045651, gc%: 53.31%
CDS_POSITION BLAST_HIT EVALUE prophage_PRO_SEQ
---------------------------------------------------------------------------------------------------------------------------------------------------------------------------------------
#### region 1, GCA_013359385.1_705 ####
407..2500 PHAGE_Rhizob_vB_RglS_P106B_NC_023566: putative DNA polymerase; PP_04941; phage(gi589890443) 0.0 MSFTLDNAVFYDVESFPNLFTLNAVPLNGDVDSTWEISTYRDDRHQLFTFFNHLRQTQSPMIGFNNLSYDYPLIHWIFKNPQCTVEQIYHFSKNIIDTNNRDRFGSTIWPRDRFAPQIDLFKIFHFDNKAKTTNLKALQINMRSENVMESSVEFDTFVQPHQVPEVITYNRHDTAETKKFGIGAMSAINFRMVLVDKFGVEVLNWNDTKIGENILIDKIGKDICYTKDHNGRSQKRQTIRQSIDMRDVIFPYISFQNPEFQRILDYMRAQVLRPEEFVDIETGEQSLGETIKT…
2730..2945 hypothetical; PP_04942 N/A MKQAEITITRKHRYDVKVHSASYYDESLPEPEFEGQIHAVLIRNLDPNGRFNGGGATFYEAKDGKWEGVT
3046..3390 hypothetical; PP_04943 N/A MLRMKIRKLCRKMRNHVENDDFTAALRVVEKMRNVIETGRDAKREKIADKKMINEIEVDHVLFGFNSVDENAPIGCKVALVVGFECDDFIYHIYEKTERGWEEFPYMADTEKVE
3405..3614 PHAGE_Pectob_PM2_NC_028940: hypothetical protein; PP_04944; phage(gi971758152) 3.90e-05 LFAGLEYYATGGMNDFIGSFDNQNTAAIEGQLACRKITKDGRGTWFHIYDTEEMEIVEFSGCPFGCGEQ
3631..4530 PHAGE_Halovi_HRTV_8_NC_021321: hypothetical protein; PP_04945; phage(gi509139744) 4.42e-14 MSWITVSLPDGIGVYETWEGSILEKEENMKRGEILDSVKRTITQDRNNRHGEPENSFPQIAERWSAYLAQRFGVMPETVSLWPSDVAEMMALFKDVRFHMQPENPDNKHDQIGYLAIAAELRAAEMTATGNNSNSAPSSVPVGYFPKPEKKPVLMTLLGYPITQIINSTGDAFPEGCEQGEYLAVKRGDTDYSIFKFVKEYGVWDYITECYVPASRIYSDHLCSCLVSQTKDGKFEPLFPKKFKPNPSYNFFPRNAFDGDMIAAEVLMGPGTSNLQTKFFRYVSEGDEWVEIRSQPA…
complement(4585..5388) PHAGE_Dinoro_vB_DshS_R5C_NC_041921: putative transcriptional regulator; PP_04946; phage(gi100045) 7.88e-43 MKENREIVQKRIGLSEGGFVNNPKDPGGATDRGITQKTFDAWNRVKKLPLRSVKGISKDVAEEIIFENYMRPVKFDDLPAGLDYAMADYSVNSGPARANKELQRLIGVSADGIFGNITLSKVQQIAQEPGGIHDLIEGLCAARMAFLRGLPHWPEFKNGWTDRVQTVQEAALKMAAGVQCAAQPAAGFISAKAPEPAAPVSAAADPASVGAVISGGGVLAAVGAVIGSLAQLHPVAQSVAMAGLLVAGVGIAFVLRKRILAIATGGL
complement(5420..6166) hypothetical; PP_04947 N/A MGQSTTLTDVTSGNTSLPLLIRYNTSDILAMILEWPTLRSFFDFSDRNTMTESGGEVVSVADLTGNFIATAAVGERAVYSATAINGQPGLVFSGTKKYKVVGMMAADTSVSWASCYKSTAPTNASQMVLSDSATPSQNLYTGGDAVRMFSAALEMIVPNMRNRPVNTIWTMNYLTDVINVYCDGISASGSSNQAIMSGDANIGAWNDGVTTNRWIGSLGYLAHFTEDASQNAALRNLLDEYKLRRWRG
complement(6179..8290) PHAGE_Vibrio_VvAW1_NC_020488: hypothetical protein; PP_04948; phage(gi460042928) 1.05e-24 MPAPTVNVTVTGGEANIAQLESTINAALSALYDLYSSEQNSRIDADKLGSILRMSGAAGTANAVIANIDEAQSHIEQVAGQPVQVFWPTTNTGPATLNGFAIKRKDGSDLVEGDLLGGSRQYLVVHQIGPIVYRLIASVAISDINGLSEVIASLTEPGNTGTVDLANNAVTNAKLATMTEGTFKGRKLGDGTGNPQDLTIAETRTALQINNLNNTSDENKPVSIAQQAEFDAATLERAILRAVQQVLVTSGVFPMGENNLGLVHGITDRTGRLLWGQRASGATHEA…
complement(8302..10458) PHAGE_Entero_vB_EcoM_FV3_NC_019517: putative tail fiber protein; PP_04949; phage(gi422936358) 3.67e-18 LILAILIATPASAGPILPLIQAAGTWLTATFGATVGAAIAQFGISFVVSGLIAAVSSKKMGGQQQLIRELLQPTSLPVQRFVYGKFRAPGTPAPVRVIDDILYGCFILNSRESAGPFTVYFDKREVEYTGNPYDFSGTGGVASNEPFVDHCNFWIGKGDQVSPPALILSEASEYFESTDGWRGLTVLWVRLDVGGNSKRQERWPATPPEVMVDGEWSLVRDPRTPLADPSYSSNQALCVLDALRDNPIRQYEDENLWLELFEWSADVAESDF…
complement(10466..10846) hypothetical; PP_04950 N/A MDQVELIMCCPMIWGKSDCVKTTTQIFKTVTGVDLLKNAEPYFNLCSAVKLIRKHGGFLRMVETIAAQAKLIECDPCCGAIGISESGLASGPDDRALLICVQPGAWVGKSQNGYTILPKAERCWRV
complement(10864..11418) PHAGE_Vibrio_SHOU24_NC_023569: hypothetical protein; PP_04951; phage(gi589890603) 2.65e-14 MSNPVLLVYLDWEGAPVYAHTGVGIIEWNGHEWEGVGKFSEIAIPEESSGLAMIEAVLTLAGVDADLQGHIDDNIQGRIAEIYVGALTDRPGGFDGKQNDVLIGTPISIFTGKMDTFGISTSKAGRGKVVNRAVISIATGVEARSAFSIYHNDENQRREYPDDTAGRLVILAYANAQKLTWPQN
complement(11460..12101) hypothetical; PP_04952 N/A VQRRRRIATVQASAIFSPYAAGGGYMEALKRYLKGGIHLVRLRYKTRTKFGPDVVNDELRGGEYIGWIEPPAGVEWTEPPGGVVWFNGTNLTCTIVTDDAGFPNIRIEGLPPNKLVALPGEFVEIVSVSDVVESHVVAKPTYSNGSGVARVRVVDVPSFGGRVSLGSYDTGVFKADELPEAMEPGGADWSYTWNFTEVYEDERGPFVELNPWI
complement(12215..15187) PHAGE_Roseob_2_NC_041958: portal protein; PP_04953; phage(gi100069) 3.80e-62 MQDIAKIGFQAETTQLADAKKKLEQLEPAAKKVETATDKLAKKMGWAKDAQGKWRDEMGKFVPAAQRAASGIDGLESRVGKLGISLGSFGRVFASFSGGLLGALGIGAATLGIGAMVPLLADFESEMSSVAAVSGATGDVLERLRDTAKDLGATTEFSATQAASGLKLLSQAGYDAESAIATIPAVLNLATTEAMDLGVATDYVASIMAGFGLAAQDAGRATDVLVYASNAANTGVADLGEGMKYVAPIARALNISLEDTAAALGILSNAGLKGSQAGTALRGSLAALGNPSKTAAD…
complement(15191..15487) PHAGE_Rhizob_vB_RglS_P106B_NC_023566: hypothetical protein; PP_04954; phage(gi589890425) 1.07e-05 LHERFDEAPPPPRIIPEAGETYWQWYWEISDTLRRVTDGAPNPIPPTEYLAWAQMTGRIVWPSEYAILQAMDRAFCKMTGQEIKEYMERKFPPKQKGK
complement(15571..15993) PHAGE_Rhizob_vB_RglS_P106B_NC_023566: hypothetical protein; PP_04955; phage(gi589890424) 1.20e-17 MKTPKIINLTDTDETDILDISEIQPGERTVELLHPGTGQKLGISVRIMSADDPRLKREQRALMDRQSERHRKNKILTAEEIESAMVKYLAQTITGWDWGKRKLNGETPEFSVRKAIEILTEFQWIRSQINDAVGDTAAFF
complement(16017..16544) PHAGE_Rhizob_vB_RglS_P106B_NC_023566: hypothetical protein; PP_04956; phage(gi589890423) 1.97e-54 MRRLSLINTALLVGALPAAFVNTNAGCKLYVCSTPQEIGIDETDFEALNWVEVKGLGSHGETGSATNILNYDTWDLKVIQKAKGLTNAGDPLIELARRPTDPGQIIMRAAAKTNGNYAFKMQRNDAITPTTGTPTILYNLGLVTGPVRPHGRNEAFEIENFTVALNQEEIVVDPT
complement(16559..16897) PHAGE_Rhizob_vB_RglS_P106B_NC_023566: hypothetical protein; PP_04957; phage(gi589890422) 5.90e-22 MGRTFSVPNDQKYIEILLFTDDNANETWGNDQMFSGILRLILHWPIDDQGIYGPSEIMDTLTAKFPKGRIITRNLVRLMINDNPRAQDPIENTNDIEYPATIAYQFFYAPTT
complement(16975..17361) PHAGE_Rhizob_vB_RglS_P106B_NC_023566: hypothetical protein; PP_04958; phage(gi589890421) 2.87e-25 VDEIVRRNSALMGMVAQESIQRTIKIAQTPKRKGGKMPLRTGFLRASGRLSLTGVPTGPIRPAKKGEKYSSSENVIIAGFKLGASVFWGWTAIYARKQEMHNDFLGSALRRFQKTVDEVVLDLRNRMK
17384..17689 PHAGE_Rhodob_RcTitan_NC_029097: hypothetical protein; PP_04959; phage(gi985760185) 2.17e-41 MRDPITRARSGQLSAKHLLTNRNQTLSYGLSKQRNEGTNEMNASDKIAADMIAIYFAGVAKTQKELRQAIVALQNTTLFEDALNVEAIARHNESTQGVKMF
complement(17768..17992) hypothetical; PP_04960 N/A LNEIQCFAKRNFTFAKPVQSFLFFGDGAALGTFLRPFSKFIQFTVNRIEKRFRQIDSEAVKHGHLFSSFVALFR
complement(18028..19200) PHAGE_Rhizob_vB_RglS_P106B_NC_023566: putative head morphogenesis protein; PP_04961; phage(gi589890414) 6.07e-118 MKLHKKIEKLVGIYEASIRDAFLSAIADISNRAILSEIIESIESGDIERAIRSLGLTDSAFRSIISEIERAFEVGGVTTGESFPKILTTPTGRTVFRFDVRNSRAEAWLRDKSSTLVTSVAETTRATVRQTLQRGMAEGVNPRTTALDLVGRIDRPTGRRVGGVIGLTPQQESWVANTGRDLRAINDLIELRASALQAGNVKEAQRLFEKIENHQYFRRDLRAKSGDKVILNSARNGEKLNTDSIQKLKTQYESNALRYR…
complement(19205..19567) PHAGE_Rhizob_vB_RglS_P106B_NC_023566: hypothetical protein; PP_04962; phage(gi589890413) 1.28e-29 MTLYDEMQQLTREILADPDFKQGETQLVQLTPGTGPIDDPGAPTRTLYNLNATARGVKFSYVAGGLAVASDLQVTHSVIPGVTPKMTDFVIADGVTYKIVAIIPKPAFGTTVSFTLIVRK
19657..20157 PHAGE_Rhizob_vB_RglS_P106B_NC_023566: hypothetical protein; PP_04963; phage(gi589890412) 1.23e-16 MAQKTMPTPAVTETPAVPPVPAAAPAAPAIAPATVAKTKEPRVAPILTAVSSAVPMPTNVSKRGRGGNSIYPFEALEVGQSFGIANKSAKSIASVVNGANKRFEADAVDAAGNPVFKVQEIKQADGTVINVPTLEREKMPGRVFIAADVDPNTDPDKASVRVWRKQ
20282..20545 hypothetical; PP_04964 N/A MFAQSAALTEAYISLKFSAYTKQDCIEVAKQAARVIEGCKKAKSDVYTNGPKIHGAAQQSQLDLLDIWEMKACAIFDNASDMAAKAK
20630..20851 PHAGE_Rhodob_RcSpartan_NC_041963: tail fiber protein; PP_04965; phage(gi100052) 6.52e-11 MQTLCHKIETFGNSMMGRDFENIRKITIEVCEVHSDCHFTIDDSRMFLRVIARCNGAALRDLVQKLDTAGYMD
complement(20878..21291) PHAGE_Rhizob_vB_RglS_P106B_NC_023566: hypothetical protein; PP_04966; phage(gi589890411) 2.80e-27 LDETEILAALLVASEWLDARYRLKFGGEKMGGREQVREWERRAAYDIYDKLLEGIPREIEYATYEAAAIQGATPGALSLNFTPGKYESVSIDGAVSVVYATIQSVSDVQTQFAIIGEILSPILTGFGGSSVTGSSCR
complement(21356..21688) PHAGE_Rhizob_vB_RglS_P106B_NC_023566: hypothetical protein; PP_04967; phage(gi589890410) 6.39e-08 MKTPVVTVETENGPVRIDLSDYRPHMGDILDSDPPLTPAQIADLIGSAAPVAAPVAAPVAAPVAAAVAKRKGRWYLTDLTGANVTGPNIEKDGYATEAEAWAVIMGGANA
complement(21714..22031) PHAGE_Escher_N4_NC_008720: gp63; PP_04968; phage(gi119952232) 5.09e-21 MPQNQALEIGFAVMQDQMKRIIEDNEDAKKSRKETYQKLEMMDKRLHLVEMHVSTAAPTLAEFIVLKHKVAGAGLLGKWLWAFGGVLIGVVFAGREAVKNWLLGN
complement(22107..23330) PHAGE_Rhizob_vB_RglS_P106B_NC_023566: putative coat protein; PP_04969; phage(gi589890404) 5.16e-158 MRKSSLLLGATGLSAPGIVHMSAYANTLTRLIPELYAALDVVSRELVGFIPSVSRNTSAERAAVGQAVVWPVSPVANMFNVTPAMAVPEPADANIGNGSITITKSRGAEFGMTGEEQLGLSHGVGHLTVQGDLFAQGLRALVNEMETDVAIEAALNGSRAWGTAGTTPFAIGANQNLGDSAQVRKILDDNGAPLTDRSLVIDTSAGANLRTQYNLTRVNEAGSMMTLRDGELLNLHGMSIKESAQTRLVSPGNGAAYTTNAAGYAEGATAITII…
23532..23759 hypothetical; PP_04970 N/A MPVNKETFGTKAFHNRETKLHSLTRHGISRVEASGLIAMTDEQLKSFIAMISKIEHPRGAEMLNAINEEINARKA
23761..24066 PHAGE_Microb_McGalleon_NC_049927: minor tail protein; PP_04971; phage(gi100056) 4.88e-14 MNNQRRKEIAKIISMVEAFQQDFENLKEAVSEAKNQLETVLDEEREYLENMPESLHSSDRYYTAEAAISNMEEAFSEFENLENAFEFDSESVVEKLDTARE
24081..24308 hypothetical; PP_04972 N/A MQIETNWENAPIGDGGEYLKRNAIVLARIWPVGQTWQIAVNLPDAKVPKHIHSSKQQAKNACAEAVKKWFDRIDA
24430..24615 hypothetical; PP_04973 N/A MEAESVQEWNVEQRDWLTDLAEQWDQDDCDDWDDFREILPDQEEPYEFDMTDPLDWYFDDY
complement(24704..25522) PHAGE_Rhizob_vB_RglS_P106B_NC_023566: hypothetical protein; PP_04974; phage(gi589890398) 3.73e-53 MSNALIGLMIRAGIPMAFENEGNGGWKMDGDKPVFKDGNPVWVSKDGTESVLQRDTIERLNSESKTWRTRAEENMTQLKAYEGLDAAKAREALEKLQKIDQKSLIDAGEVDKVRNEIKSTYETQLNETKGTITKLQDRINGMITDSAFSASPYIRENIAVPVEMFRGAFGKFFKIENEQLQAFDAAGNRLMSKKKIGEYADFDEAVELLVESYPQKDAILKAPDQRGTNSNGNGGQRGGGRTLKRSDFEKLDAAKQYEFSVAVRKGEARLID
complement(25525..26970) PHAGE_Rhizob_vB_RglS_P106B_NC_023566: putative structural protein; PP_04975; phage(gi589890397) 5.64e-153 MTDKPDLSARSKDSAAMLPFWKKVAAIIGGENDVKEAGEEYLPKLPHEPKKQYDFRLSVAKFTNLYRDTVESLVAKPFEEEISLVAGENETVPEQIASFAENVDGDGNNLTVFSSVLFFNAINDAITWIFIDYPNVAVRTMAEAKKAGVRPYWTNVLAINVLEARQTRIGGESVLSYIRILEPGESMADDKVRIFERNENIVTWSLNARGEKSGEWIEEDSGTLSLSEIPLIPIMTGRRDGRRFFFRAALQDAVDLQMTLYRQESALE…
complement(26972..28642) PHAGE_Rhizob_vB_RglS_P106B_NC_023566: terminase large subunit; PP_04976; phage(gi589890396) 0.0 LKPWKPRPLAHDQWPPDYRRVFAWRLKTRQQLRSDPNFAASAKKYYSTRPGEFIMDWMDTYNPRKNSMKWMPFVFFLKQAELIEFFHTLRNEQESGLIEKCRDAGATWLACGYTVWAFLFIKDGSIGWGSRKAMLVDELGNPDSIFEKMRLIIRRLPACFLPKGWNEKKHATYMKFQNPENGSSIKGEAGDNIGRGGRSDMYFKDESAHYERPDKIEAALSENTNVQIDISSVNGLGNVFHRRRSKGVEWRPGAVIQPGFTRVMVVDWRDHPEKTQEW…
complement(28692..29876) hypothetical; PP_04977 N/A LAHRGGATGQFFGVANAERFHHDRLAIHVPINESDAEPTPGTFDFGMTAAAQRSGKIENCGRGAFHFAQSTSENLRKQNGPFENFLFEFRQMFRAVMRRIIIVETAPNSLHFRRARIQRDFNCFRVQNRFDRVQNRDKFYGRPFKRFVHIGRRISHLHAETFFRVVSHFSNLSDFGNNRCAGCVFAPPEHATDISRPFGFARFLEHFPSFTDLCGGADQVGNCAAGRVVSVFRGLVFAVDDDVKSFAGCHLFDLSPGVFSRGRIHRLHPLNRVCSVCENFVGIGFPFLAFVTNLTQRIEHNGFFFLFGCHRISLSEFERKHETRHAVIFNTDQQRGPAPFIPSAFAS…
complement(29887..30534) PHAGE_Rhizob_vB_RglS_P106B_NC_023566: hypothetical protein; PP_04978; phage(gi589890488) 2.87e-05 MNDLAKISYEPPYRQLDQAARQMVDDLIRKIERQSDITGAPLFDILASYQPTEREITFLARGLVRAAIFDRVRDLTDAQNVTPRRIIKELEALAFSSIDHFRKPGASLDYGTGVSELLVAADGGLFELEYATPEQRAAVKEVEIEENARTGKIKTKIKLHDKLAALRMLGQIRGLFNADGDPINPEKWVEGGGIPVDASQETAAEIYMQAFSDDS
30639..31052 hypothetical; PP_04979 N/A MILNVEPGPCAIFIPQVTLWRNGLESSRFYFVAFETVSPLLNGVHRSNSGYFSARSNKEPKIVVNNMGFHESKKKLDDLFYDLHWVNKTPDSIMRQIPKRIKVRLWKDREERLRLELRAVQVSLIDVERILKERPEF
31054..31305 hypothetical; PP_04980 N/A MTIHRPPAPIKAHHDGAACLVLAARHRPAGALRLLLRITTAKSARHPRGAVIWADADGVFLRGMTGPIFAAVWLHFMREETTK
31493..31696 hypothetical; PP_04981 N/A MKICASNPLLGEYTICGDAFDLDATDTGAEEFQEFRMSEPGDKVTCEKCLSAIAEIHRHYTPKGKMK
31708..32124 hypothetical; PP_04982 N/A MINAIEPNDSSKEMQPAYACEDHFGPGEHGIHFFTQPHIFHKIKNVKFEKVTKNQILPEWLTKQRNEWELETHLRTDGFECLAFHKGKWAHVKWCAVNESWNLGRGKPFVEDGNRAFAHLPDNTPSREFPNGFFDWKG
32149..32412 PHAGE_Stenot_vB_SmaS_DLP_2_NC_029019: hypothetical protein; PP_04983; phage(gi971766275) 1.10e-10 MVYRNRNEGTKEMSIGLELLAEKLSEAIGVTVEITIRSEEKFTFSTDEICHDLEARCVEFFAPHLVIECKTDHDEECGSFVYMAIAQ
32581..32862 hypothetical; PP_04984 N/A MLKIRKIRCPLTIAPINLEIPKDSTILSVSVLWHEDSMNEEIAMWYSCPDPSAETNVRRFEWFHAETNVLPENARHVATIQTFCYMVYHLFEL
32873..33046 hypothetical; PP_04985 N/A MAIRGAKLSTATLTARCDKYAEEILTNIMKRTRPNGTTTAELANKLREIIEKEVNRP
33060..33323 PHAGE_Rhodob_RcTitan_NC_029097: hypothetical protein; PP_04986; phage(gi985760187) 1.57e-23 MLTNRNRTPIYTVSKQRNEGMKQMFAQAYDNRTDRKAAVLNTARPFVAVKPKGYLNRVIGHYETMKAAEAAAKRFNDQIANHPDFDF
33343..33534 PHAGE_Rhodob_RcTitan_NC_029097: hypothetical protein; PP_04987; phage(gi985760188) 4.35e-34 MGRVTRVFYASGAKGKEVRADGDGKHLARGWYCRTDGRGRFGPFKTKTEANMKAFGQAREPKN
33681..33902 hypothetical; PP_04988 N/A MFEICALLAPKKTAKVRKTPVKTVGPGKVATLTINGATVKILERDTKFKNAWYVEQDGERLPFSFSRDVLVIK
complement(33968..34285) hypothetical; PP_04989 N/A MTVHRLEECRNDFMTGFSMNNHFGQHLFGFIAHLFRSFVSVSLQYRYAFNFGLSTQLRLIWCKNSVRQIFGLFNFAGAEEIETAFRIKVTGHFSKIINVFQRLRF
34375..34716 hypothetical; PP_04990 N/A LRAGSDRNPHRNNNPSLKGIEEMKLNLEIITDETKETRTIWRFTYFTGYGRTGATLDAYFEMVKPGGRRKWAVVKSWSRIDNRGHSMKNPPDVPEIVKILALQEYAKSLKFLD
35144..35629 hypothetical; PP_04991 N/A MQTKLNEFPAAMVIYEIHAAPPGADRFQAYVGRCRLDELHMLTDARRNEAMRNLLQNADFMRVAQITILAIETDPRTIFEKHINGFTVLLNPAHAYINESDVMRPKRGRQTEKIECNETGEIWENAAAACKALAVDPAAMSRHLKTGRGRVAGCTFKRWIE
35835..35975 hypothetical; PP_04992 N/A MRDGRRGYARRPAPCADVSTADQPTQRPGIEPVRPQGDVFGNRRDI
complement(36074..38476) PHAGE_Rhizob_vB_RglS_P106B_NC_023566: DNA Primase; PP_04993; phage(gi589890466) 0.0 MSDPYALAHAWAAALTGDADNAVFNWRFIHDKDKATAAIKRRGTLAQIWNEANQWNAAGYGVFATVNEMDGTGYSPNGQPIHGQSGDTLEHVAGIRAHVVDLDNLSAMENLQRASGHIPAPWFAVQTSPGKAHVYWPLHGSERYRNNDSYRLLQRKLRQFYDGDKAVIDATRVLRVPGFWHQKGNPHLVTCYGLPGYGMPVSRDMLAISVAHVNAPEDHGGRHKLGDAELAAPGADWLWYALDSMPVDGMSHPDFISFTAAWKQAGWSVADHDEMRNRWLQWCERFGTES…
complement(38503..38784) hypothetical; PP_04994 N/A MSETPKILQPDHAPANRASQCKSVQISGCVTRAAGAMAVALTRRADNDKKNSEPDRPCAICGGFEKNHLQHVERQAFPRPPDSEVQPAQVVCR
38807..39385 hypothetical; PP_04995 N/A MKAVIDAHRAADLLLQGTYYEKDTGRGCFVGCLVKGNGVPEIAVKYGIPEPVTRILEHVFENLPFSEAADFFSEIPRAIGKDGKDLSRVIWLFVAEMLQEMPWKITAEMQTVINGVNLLVSGGDWLEHEANDAAYAAMRFDNPIAAHIAFFAANNQPYGICAAATSAIRVHEKGAELERQRASILRLLRDAK
39663..39860 hypothetical; PP_04996 N/A MLGFRKAEVDALRREYQNAARLVDISRNGPEVVLTFIRQGEPFTITVQGTWSDDVNAWKRAAGLE
40057..40224 hypothetical; PP_04997 N/A MIEFIGGMVLAHCIWLGRYSRLKEKHVELVMQCVKQVQIVADVRNEIDEIKKMKG
40228..40416 hypothetical; PP_04998 N/A MFIKLKSTTGNTVLINIDEVISIFATKTAQTAVRLSNVDNMQFVVETPDEIWAMLKEAGETV
40473..40904 PHAGE_Dinoro_DS_1410Ws_06_NC_049371: hypothetical protein; PP_04999; phage(gi100077) 2.04e-13 MSHTEDYNDAHQGRVARLILALHPSPSALLIAAALTHDDGESGPGDMSRQAKRANPELRAMLQELEDAKICQIWNTPIPPRMSLNPDEIAWLKFCDLLDGYMWVKHKNPNILAQPGWIANRNELAEFAKSQHIIHLIKTIGLA
40922..41368 PHAGE_Rhizob_vB_RglS_P106B_NC_023566: putative nucleoside triphosphate pyrophosphohydrolase; PP_05000; phage(gi589890462) 1.27e-34 MAINNITKEQASAFKNYPNRPMELYQVLATQNANWPGKGTALGLIYVAGKLAGETGELVQQPFKAMRDDDLLFVQDHDAEIQFLAVAYQDLTPERRAKIIKEAGGVLWYLAALATELGMNLSDIALANLEQLADRTERGTLSGDGDDR
41372..41791 PHAGE_Paraco_vB_PmaS_IMEP1_NC_026608: putative HD-domain protein; PP_05001; phage(gi764161998) 1.36e-33 MADAVKPATIRIAIASFAKVAIAVRNVAFVVKQIVTVKPALTEGNKMADPVGFEGANVLMSGEAANCRDLEVFADGKQFVSCWRLTAEEMSEIAKTGVVWVSVWGGGMPPILISGTALVFIGERPAKAEPIIPKRKDAL
41836..42021 PHAGE_Aeromo_vB_AsaM_56_NC_019527: hypothetical protein; PP_05002; phage(gi422937494) 2.52e-09 LGEGLDPFNLKRPYDSTDNPPHRSGLRLHRDALTGCEYLSVLWGGVTPRMSADGQHMGCQR
42124..42486 PHAGE_Acinet_YMC11/11/R3177_NC_041866: exonuclease; PP_05003; phage(gi100048) 3.23e-11 MHWINKGWQNVFIGYCPDKKSWKKQMKKFKLKEPYPTSDGRCSIFEKDGKVSCIITFRAIETHGKIETIGLVVHEVLHVWQEVLLNMGETKPSPEFESYSVMAITQNILEEMERAGKFKL
42543..42692 hypothetical; PP_05004 N/A MLAYVDPESDWLCVLDGRGYVVSRPDVIYHESQILNILDAWNEKNTKRR
42902..43063 hypothetical; PP_05005 N/A MKTQYMVKTLAGDYVAVVNSIQFARSKARQCEDATGKKCIILEIQIVKEITEY
complement(43064..43336) hypothetical; PP_05006 N/A MKAKMQNRARMIAAALLIWEAQGEKGVTARNVGKAVGVSGQRVQQLFKTMQALKDDTARAAVSCNRTGVIMQLQASGHPLAPKSEPGKLI
complement(43351..43680) PHAGE_Rhizob_vB_RglS_P106B_NC_023566: hypothetical protein; PP_05007; phage(gi589890454) 1.55e-25 MRNNVGVAFDTTGRAIRYGLMNESSKVNDEFKSSDLICITPVLIGPQHVGRIMGIFTALETKKTDWHLTKGDKRGQAQLRFMQLVRGHGGIADFISDPAQIRNLIGIYQ
complement(43740..44372) PHAGE_Rueger_DSS3_P1_NC_025428: DNA methylase; PP_05008; phage(gi712912836) 2.02e-62 MRQMQPDSVDCIVTDPPYRTISGGNAPTDRNGYPSSVLHRNDGKIFDHNEVKPQEWFPMLFNLLKPGGHAYVMTNNLNLELFLATARETGFLFSNLLIWEKNNVNANRWYMKNTELTLFLQKKPATQINNCGSKQIFKADNPRNKSHPTEKPVALMRHYIENSTAPGQVVFDPFAGTGSTLVAAQQSCRTWIGCEIDFNYYFNACERLGK
complement(44413..44613) hypothetical; PP_05009 N/A LKQAIFDGGEICLSGIDATNPRPRRDVVNRMAEKGFLKYAASCQTGMSIGLTDYLQVTKAGYDALL
complement(44630..46288) PHAGE_Rhizob_vB_RglS_P106B_NC_023566: putative helicase; PP_05010; phage(gi589890453) 0.0 MKSDHYQAWNQGAKNNLAVLPTGGGKSVLVTDIVLDQVRLGRPGVVKAHRNELISQMSLHVARRQIPHRIIGPDTMIRSIIAQHREEFAGRSYVQQDAITTVAGVDTINARKDSLTEWALQQDYWITDEAHHLLRANKWGKSVEIMPNAFGLGVTATPERADGKGLGAHADGVFQHMTLGPQMRELIDMCFLTDYEIAAPEASFVMTDDDLTPSNEFSNDKMITKARNSQIVGDVVLNYCKFAFGKRAICFATDVETAEKISKSFNAAGIPAAAVSGKTHESVR…
complement(46318..46713) PHAGE_Rhizob_vB_RglS_P106B_NC_023566: hypothetical protein; PP_05011; phage(gi589890452) 1.47e-23 VRHDPPNSYGDCVRACVASMLDYPAKDVPHFYHDNCDGEEGTKRIRAFLAERGFVMIHFAFAGSVQLADILAGWAEMNPGVPAILFGGTESGDHCVIMQNGKVEHNPAWYQNRIIGPNSGGTWNIVLFIKA
complement(46734..47132) PHAGE_Salmon_vB_SenS_Sasha_NC_047786: hypothetical protein; PP_05012; phage(gi100149) 4.11e-27 MTRLVVTGGRDFFDARKVISEFTKFMIHHGPISLLIEGESEGLDKTARWCAENQFRIPVLPFPADWDNVTVPGAKIRYRSGKPYNALAGHWRNGNMILLGKPDFGMVFPGGRGTADMKQRLELAGIPIWEVE
complement(47134..47754) PHAGE_Rhizob_vB_RglS_P106B_NC_023566: hypothetical protein; PP_05013; phage(gi589890450) 1.20e-20 MQIEVSCETIGRLSRINATLPANEPREWLRSFFVERRNGHGYVGATNSIFAAVQYLGPSEGENGFVLIRHGALPLRAWAECEPETKCTINEISALNYCGIIAPGSYSSSSDVAIRDVEPVNTLKNWREWAPRSAPPAGRAMFLDVDGLGALIGSSPSGRVIFPKQIDAELPVIVRDVTNPDWLGMFLARASNGLFIDGATRPDWSL
48014..48730 PHAGE_Rhizob_vB_RglS_P106B_NC_023566: hypothetical protein; PP_05014; phage(gi589890449) 6.24e-09 MTGISLTFGNLSAAMAIALINTASTSGGAASAVVVSNSDDDDSGPVNTNAPALDATGLPWDERIHAKTKTQTAAGAWKKGKGVTAEMTAAVEAELRAKMASPVPQPNFGQQQPGPFVPPVQNAAPSYGFANPTAVPNQAVPVAHMPEMQQQPAPIVQQPAAIQQPQQPSAIDFNGLMVLFQKAMAANRMQVTDVAAYVGEINSAWHTNFGQITEISARPEICNWVVQLLQRDNRYIAG
48733..49836 PHAGE_Rhizob_vB_RglS_P106B_NC_023566: hypothetical protein; PP_05015; phage(gi589890447) 1.54e-61 MFETVATEIPRILACNGSRLLGGSMPPSNSDPIARDEGIAAHWLIQSVFRGADAADLIGKKAPNGITITDAIARSTADFLTHVAQNRQTSLCQGVEQDFELTGFNWRIVSRPDHYAFNGATLWIDDFKHGFRVVEAAGNWVLLVYAISVARSIAQQIGVMPHHIVLSIHQPRVPHPLGTVRSIRLTGNELQQYAEYLDSRLTALDSMLHTGPHCHRCANATICPALRTAGFNAVDVSQTAHAESITDDAISKELDILDNAEKLLKARKKQLEDLAIHRLKQGAIIENY…
gi|00000000|ref|NC_000000| Genome; Raw sequence 6481920, gc%: 53.90%
CDS_POSITION BLAST_HIT EVALUE prophage_PRO_SEQ
---------------------------------------------------------------------------------------------------------------------------------------------------------------------------------------
#### region 1, GCA_013361015.1_1023 ####
695..1858 PHAGE_Mycoba_MiaZeal_NC_028953: minor tail protein; PP_05760; phage(gi971759943) 4.18e-17 MSRYLRPVHFFRGTILLIVLFSLSPQSPSSHSTPTGTASPDSLLLQYDAFVDSFMTESKAPGVAIAVVKEDQIVYIKGFGHRRIDARERIDGNTVFRIASLSKGFASVLTGLLVHDGLLQWDEHVMKYLPDFALRNPKNTRELTIRHLLSHTSGLLAHSYDSLIEDNVEFEQMARQLREVPITCAVGECYSYQNVAYGLIGPIIANATGKTYQDLLAERIFKPLGMTEASLSKAGMLATRNVAYPHVMRKAEWHSAEIRDTYYSVPPAAGVNASVHDMALWLRALMGGIPQVVPPEVVQ…
2062..2346 PHAGE_Bacill_0305phi8_36_NC_009760: GroES; PP_05761; phage(gi156564025) 1.08e-10 MNIKPLADRVVVKPLEAEVKKQGNIIIPDTAKEKPMQGEIVAVGPGKTTEAGQKVAMEVKKGDKILYGKYSGTEVTVDGVDYLIMRESDVLAIL
2493..4127 PHAGE_Cellul_phi38:1_NC_021796: chaperonin GroEL; PP_05762; phage(gi526177556) 1.07e-100 MAKIIDYSIDARASLKRGVDALANAVKVTLGPKGRNVVIDKKFGAPTVTKDGVTVAKEVELENPVENMGAQMVKEVASKTSDNAGDGTTTATVLAQSIFNEGLKNVTAGASPMHLKRGIEKAVNVVIGEVKKISKPVPGKTEIAQVGSISANNDKSIGDLIADAMEKVGKDGVITVEEAKSTETELKVVEGMQFDRGYISPYFVTDPENMEAILEDAMILIHDKKISAMKDLLPILEKTAQMGRPLLIIAEDIEGEALATLVVNKLRGTLKVAAVKAPGFGDRRKAMLEDIGVLTGGRV…
4203..4424 hypothetical; PP_05763 N/A LRLLSHGSAMACSNALMQHYKLLESFYGKSLLHLRVIFACLPHRYLFALVDFKATASRRLKYIFKRNACSEAL
4706..6028 PROPHAGE_Shewan_MR-1: ISSod7, transposase; PP_05764; phage(gi24375048) 3.71e-17 MVLAQQEHLFQLLNSLLPTAIAPQDKFDARHFQRDRIFTPQLLTFTTLYLVCDQNNFGYKHILETLWKKMGELAMVPPATAAPQKSSFCKARRKLPAKYVHDMFRQAVERSEQMEPQRLWKGHRLFATDGMKVSLPSSAELKAHFGCPQNDTGEAHYPQALLSELFNVLTDEVYDYTLSPCTTGEREQALLHLKRLRAGDVGLHDRNYPSYEMFWEYQKRKIHFVMRMPLAPWKIVEDFLASGAVDRCVKLNMPASAHKFYKDDPTVPKHMTVRLVRVTLPTGETEVLVTSLLNRKLYPTKAMQELYI…
6288..6485 hypothetical; PP_05765 N/A MIMPCTSASYTAMTTPPTAPAITALDQFITPSSFRVKTNSVNKLSRLKPRREAAQGGSFKLEAHA
6578..8785 PHAGE_Escher_RCS47_NC_042128: DNA primase; PP_05766; phage(gi100132) 9.67e-38 MTFRQCRNPEIPTHRALDFAATNVHLGEVPEVKMQIPKNKTQFPRRVCLSFGICFLRFAVWISPSEYSMPTQVFASVCTMDCPDTCSLEVEVTDGRVVNIKGTSRNPVTDDFICSKVAQYAKRVYSKDRLLSPMRRVGKKGEGRFERISWEQALNLICEQAQAIRTQWGGEAILPYSYGGSNGVLGQDTTDKAFFAKLGASRLERAVCAVPASAAAMGVYGKMAGVAFEDYVHARGLIIWGANPKASNIHLVPYLKQAKAAGAKIAIVDPMCNFSQREIDLHVPVFPGADLAVALAMIHYWHEHDLLDWN…
8943..9851 PHAGE_Bacill_G_NC_023719: gp245; PP_05767; phage(gi593777701) 3.76e-13 METLRVENVNKSFGALEAVKDLSLAVPPGTVYGFLGPNGAGKTTTIRMIMEIILPDSGQILVNGRRNTSSDALDRVGYLPEERGVYRKMKVREALEFFAELKGMRRRTHGPKIDAWMERFEMTSVRDKKLEELSKGNQQKIQFLTTVIHEPDLIILDEPFMGLDPLNADLVKEVILEQKARGAAIVFSTHLMESAEKLCDAICLINKGQKVLDGEVRSVKRNFGRNHVALGYEGKPDFLVELKNHGLVERYNDSGNHVEIHLRNAASPQKLLAAAMQNVEVLRFEVVEPSLHEIFIATVKEN
gi|00000000|ref|NC_000000| Genome; Raw sequence 6960637, gc%: 52.97%
CDS_POSITION BLAST_HIT EVALUE prophage_PRO_SEQ
---------------------------------------------------------------------------------------------------------------------------------------------------------------------------------------
#### region 1, GCA_014338045.1_394 ####
4636..5610 PHAGE_Brevib_Jenst_NC_028805: putative metal-dependent enzyme; PP_03369; phage(gi971744907) 8.55e-09 MAESQLMVGGQAVIEGVMMRTPEMVTVACRRANGSITVLKKPYRSLLARHKFLALPIFRGAIVLIEALVLGMQALTYSGDLVEHDMRPAGNGKEAATPSLPGQRSKSDKIKMGLTLGITLAIGLGIFFYIPLVLTDLTGARSGFWFNLIDGIIRMIFFLGYIALISRIKEIQRVFEYHGAEHKSIFNHEANTELTPENSAAFSRFHPRCGTSFLLIVMVVSIFVFMFLGRPDTVAERLVRLLFIPVIGGVSYELIRLSGAGYRHPFWRTLIAPGLWLQRLTTREPDH…
5684..5935 hypothetical; PP_03370 N/A MRDDLKISEIEEQCNGQWVVVEITKRDRYRNPLRGRLLFNGSDQRKIYQNGRLYREAHPGAELYSFYAGDPIPQGIGVMFAKE
5970..6116 hypothetical; PP_03371 N/A LLVPVELNGFGLRFMVDTGAAVCAISRKALDQVVAEPTVQKVTIAPNS
6161..6319 hypothetical; PP_03372 N/A MQKNMLVTIVDLPPGFQLDGLLGMNFLGKYRFTIEPDTATLILRNIPVKKTK
6321..7388 PHAGE_Mycoba_Tonenili_NC_031080: hypothetical protein; PP_03373; phage(gi100201) 6.80e-10 MLAKLDKIEKRFEELNALLSSPEVAANPKRLRDTAKERNELEAVVKKYHEYKSLLRSIDDDKRLLTESNDRELHELASVELEELETRLPALEEELKLLLVPRDPSDARNAIMEIRAGTGGDEAGLFAGDLYRMYTRFAERQGWQLEVISSNAQGIGGFKEIIFQINGKDVFGKLKYEGGVHRVQRVPATEQSGRIHTSAASVAVLPEAEEVDIDINMNDLRIDVFRSSGPGGQSVNTTDSAVRITHVPTGLVVQCQDEKSQLKNKTKALRVLRSRLLEIKQNEERAKVASARKQMVGS…
7404..8351 hypothetical; PP_03374 N/A VETNIASAHHLRARQSPQSLYMSMTTSVDVNQPLPQLIRSLSEHFQKAGFPSALAEAEWLLAGILQTRRSELYVERNRVLTVEQQEILKQYYCRRLQREPLQYILQSCEFFGIEFKVNPAVLIPRPETELLVERVITLAQTFKAARIADLGTGSGCLAVSLAKHLPAAKVLAIDISAEALKVAEENAQANGVAQKITFRQADMCASIDAIHSNQFDIVVSNPPYILPAERDELQPEIRDFEPEAALFVEGDGLKFYRCILAFCQRHLKPGGCVACEMASQRSAAIEKLFRESNFASVEIMPDYAGWPRHLTAQKS
8362..9771 PHAGE_Bacill_SP_15_NC_031245: hypothetical protein; PP_03375; phage(gi100155) 4.30e-52 VINSNIFREYDIRGIAETELTDENVALIGKAFATWMLAQGRKRLVVGRDLRLSSNRLRDAMVNAMLGCGVDIIDIGVVPTPTQYFGIIHFEAEGGVMITGSHNPREYNGFKMSKGLRADDGHLSVGAVYGQDIQELYQIIRSNQFATGKGKIEIVTITPEYISAIKQRVKIHKRLKIVVDPGNGCGALFAPDLWEEMGCEVVRLYAEPDGNFPNHLPDPTVMKYIKDLREKVLAEKADLGIGYDGDADRMGIIDNLGRPIFADKLLALFARDTLTRYPGATIVFDVKCSQALPEMIEKAGG…
9786..10079 PHAGE_Burkho_phiE202_NC_009234: gp6, pANL56; PP_03376; phage(gi134288760) 2.92e-07 MEFEWDPSKASQNLRKHKISFGEAATVFRDRLSIAIDDPDHSIREERFIIIGVSERQRLLMVAYTERGKRIRIISARRLNPTERRAYEKEIKNRFER
10111..10299 hypothetical; PP_03377 N/A LPGGVQGKYAERYRAGTNLVLLEPDIAKAFSSDEEVNEALRLVLQMTRIRLDKKRRLQKQKA
10325..11767 PHAGE_Bacill_SP_15_NC_031245: hypothetical protein; PP_03378; phage(gi100155) 8.73e-21 MTAAPRKRFHALKVPGLNQSNGGLHSPVRFPEKIVRFDFQRSSRVFGEGLPPEVALTFAQAFGTYCKTGKVVLGRDSRVSGPMLHGAVTAGLLATGCEVVDLGIASTPTTQLATEKQHAAGGIILTASHNPVMWNGMKLLAHDGLFLDGEEGAKVNAIRASRAFALKTWDQLGALRAYNNAVSDHLQAVLSLPYLNVEQIRRRRFKVVADCVNGAGGVIVPQLLDSLGCDVTYLNLEPHGRFPRNPEPTPENLTELGRAVQEHRADIGLAVDPDADRLALVSEKGKPLGEEYTLALAVD…
11806..12063 PHAGE_Mannhe_vB_MhS_535AP2_NC_028853: toxin-antitoxin system antitoxin component HicB; PP_03379; phage(gi971749600) 2.36e-06 MQNIYKLPLLLEPQPEGGYTITCPLLPNLITEADSLDQVIPNVADALAALIEAYQDLKKPLPTILQPLQADTTIWTEMLIPARAA
12273..14456 PHAGE_Lactoc_Q54_NC_008364: putative ribonuclease; PP_03380; phage(gi115304286) 5.30e-83 MKDLIDRTLEVLAQQPSRQFKAKELARLLHVPPAKYAEYRSLLRSLAQQGLLAKLRRNHFGHARQTSTVTGKLHVKTQGYGFLIVGEDQEDVFISQKNMRTALNGDLVKVELFARPTGRRAEGRVVEILQRSRSNIVGTLRHGKHFYFVKPDDIKLLRDIYIPEENLNGAKAGQKVAVTIESWEDELQNPEGRVVKVLGFPGEPGVDVLSVAYAFDLPAAFPPEVEHEAEQLAMEITPELLAQRLDLRDRLTFTIDPEDAKDFDDAISMRELENGNIELGVHIADVSHFVQEKSALD…

## Sheet: multicopy genes
KEGG	GCA_013361015.1	GCA_013359425.1	GCA_003576975.1	GCA_013359385.1	GCA_008363195.1	GCA_014338045.1	GCA_002011685.1	B23T1B10	B3T3L14	vent-69	GCA_002898015.1	GCA_002898095.1	GCA_002085035.1	GCA_003645965.1	GCA_003644765.1	GCA_003644775.1	GCA_003644785.1	GCA_002085355.1	GCA_002084535.1	GCA_014729735.1	GCA_003818595.1	GCA_002327255.1	GCA_014728085.1	GCA_014728115.1	GCA_003854975.1	GCA_003854995.1	GCA_001771235.1	203742	203852	GCA_011775825.1	GCA_011774205.1	GCA_011777055.1	B16T1L6	GCA_004357015.1	B13T1L6	GCA_004356135.1	GCA_004356185.1	GCA_004356825.1	B79T1L10	B11D1T2	B77T1B5	B4MC02	B24T1B10	B70T1B8
K21071	3	3	1	2	2	2	1	2	2	1	1	0	1	0	1	1	0	0	1	0	1	1	1	1	0	0	1	1	1	2	2	2	1	0	1	1	0	1	1	0	1	1	0	0	pfk, pfp; ATP-dependent phosphofructokinase / diphosphate-dependent phosphofructokinase [EC:2.7.1.11 2.7.1.90]
K01803	3	1	1	1	1	1	1	1	1	1	1	1	1	1	1	1	0	1	1	1	1	1	1	1	1	1	1	1	1	1	1	1	0	1	1	1	0	1	1	1	1	1	1	1	TPI, tpiA; triosephosphate isomerase (TIM) [EC:5.3.1.1]
K00174	1	3	3	2	3	3	1	1	1	1	1	1	1	3	3	3	3	4	1	4	2	1	2	2	1	0	3	2	1	1	1	1	0	0	2	2	1	1	2	2	2	1	1	1	korA, oorA, oforA; 2-oxoglutarate/2-oxoacid ferredoxin oxidoreductase subunit alpha [EC:1.2.7.3 1.2.7.11]
K00175	2	3	3	3	3	3	1	1	1	1	1	1	1	2	2	2	2	3	1	4	1	1	2	2	2	0	3	2	1	1	1	1	0	0	2	2	0	1	2	2	2	2	1	2	korB, oorB, oforB; 2-oxoglutarate/2-oxoacid ferredoxin oxidoreductase subunit beta [EC:1.2.7.3 1.2.7.11]
K00024	0	1	2	2	2	2	1	1	1	1	1	1	0	0	0	1	1	1	1	1	0	0	0	0	0	0	0	0	0	0	0	0	1	0	1	1	0	0	0	1	1	0	1	1	mdh; malate dehydrogenase [EC:1.1.1.37]
K07404	2	1	1	1	4	4	0	1	1	1	0	0	0	0	0	0	0	0	0	0	1	0	0	1	1	1	0	1	1	0	0	0	0	0	0	1	1	1	1	1	0	1	1	1	pgl; 6-phosphogluconolactonase [EC:3.1.1.31]
K01053	3	2	3	1	3	3	0	0	0	0	0	0	0	0	0	0	0	0	1	0	2	2	1	5	1	1	1	0	0	0	0	0	0	1	0	0	0	0	0	0	0	0	0	0	E3.1.1.17, gnl, RGN; gluconolactonase [EC:3.1.1.17]
K00012	1	3	3	3	3	3	1	2	2	1	0	1	0	1	1	1	1	0	1	1	2	2	3	1	2	0	1	1	1	1	1	1	2	0	2	0	1	1	1	0	1	1	1	1	UGDH, ugd; UDPglucose 6-dehydrogenase [EC:1.1.1.22]
K02377	1	1	2	2	2	2	0	0	0	0	0	0	0	0	0	0	0	0	0	0	0	0	0	1	1	0	0	0	1	1	1	1	0	0	1	1	1	1	1	0	0	0	0	0	TSTA3, fcl; GDP-L-fucose synthase [EC:1.1.1.271]
K00965	3	3	3	4	3	3	2	1	1	2	3	3	3	4	4	5	3	1	1	4	0	0	0	0	0	0	0	1	2	3	3	3	1	1	2	2	2	2	2	2	2	2	0	2	galT, GALT; UDPglucose--hexose-1-phosphate uridylyltransferase [EC:2.7.7.12]
K01784	2	3	4	4	3	3	3	3	2	2	2	2	0	2	3	3	3	3	1	2	3	2	2	4	4	4	2	3	3	3	3	3	2	1	2	3	3	4	3	3	3	3	3	2	galE, GALE; UDP-glucose 4-epimerase [EC:5.1.3.2]
K01179	3	4	5	6	5	5	0	0	0	1	1	1	0	1	1	1	0	0	1	3	7	2	0	0	3	5	3	3	2	0	0	0	1	1	0	0	0	0	0	0	0	0	0	0	E3.2.1.4; endoglucanase [EC:3.2.1.4]
K00975	1	2	2	2	2	2	2	2	2	0	0	0	0	0	0	0	0	1	1	3	2	3	3	3	1	2	3	3	3	2	2	2	2	2	1	2	0	2	2	2	0	2	0	2	glgC; glucose-1-phosphate adenylyltransferase [EC:2.7.7.27]
K00703	2	2	2	2	2	2	1	1	1	1	1	1	0	1	2	1	0	1	1	1	1	1	1	1	2	1	1	1	1	1	1	1	2	2	1	1	1	2	2	1	1	2	0	1	glgA; starch synthase [EC:2.4.1.21]
K00688	1	1	2	2	2	2	1	1	1	1	2	1	0	1	1	1	1	0	1	1	1	2	1	1	1	1	1	2	2	1	1	1	1	1	1	1	1	1	1	2	1	1	1	0	PYG, glgP; glycogen phosphorylase [EC:2.4.1.1]
K01208	2	2	2	2	3	2	1	0	0	0	0	0	0	0	1	1	0	0	1	1	1	1	1	0	0	0	0	1	1	1	1	1	0	0	0	0	0	0	0	0	0	0	0	0	cd, ma, nplT; cyclomaltodextrinase / maltogenic alpha-amylase / neopullulanase [EC:3.2.1.54 3.2.1.133 3.2.1.135]
K01194	0	2	2	3	1	1	0	0	0	0	0	0	0	0	0	0	0	0	0	0	0	1	2	1	1	1	0	2	2	0	0	0	0	0	0	0	0	0	0	0	0	0	0	0	TREH, treA, treF; alpha,alpha-trehalase [EC:3.2.1.28]
K01207	2	3	2	2	2	1	1	0	0	1	0	0	0	0	0	0	0	0	0	1	1	0	0	0	2	2	0	0	0	1	1	1	0	0	0	0	0	1	1	0	0	0	0	0	nagZ; beta-N-acetylhexosaminidase [EC:3.2.1.52]
K01961	2	2	1	2	2	1	0	2	2	2	2	2	1	1	0	1	0	3	0	3	1	1	1	1	1	0	1	1	0	0	0	0	2	1	2	2	0	2	1	1	2	2	2	2	accC; acetyl-CoA carboxylase, biotin carboxylase subunit [EC:6.4.1.2 6.3.4.14]
K01069	3	3	2	3	3	3	2	3	3	1	1	1	1	1	1	1	1	1	0	1	1	2	3	4	3	1	1	1	0	3	3	3	2	2	2	2	1	3	2	4	3	2	2	1	gloB, gloC, HAGH; hydroxyacylglutathione hydrolase [EC:3.1.2.6]
K01006	1	1	3	1	1	1	2	1	1	1	1	1	0	1	1	1	0	1	1	1	0	1	1	1	2	1	1	2	1	1	1	1	0	1	1	1	2	1	2	0	1	1	1	1	ppdK; pyruvate, orthophosphate dikinase [EC:2.7.9.1]
K00626	3	4	4	5	4	4	3	5	3	4	4	3	1	1	1	2	1	1	1	1	0	1	0	0	0	0	0	0	0	8	9	9	4	3	2	4	3	5	3	5	6	4	4	2	E2.3.1.9, atoB; acetyl-CoA C-acetyltransferase [EC:2.3.1.9]
K01091	3	2	3	3	3	3	1	1	1	1	2	2	1	1	0	1	1	0	0	0	2	2	1	3	1	4	0	2	1	1	1	1	1	1	1	1	0	0	1	1	1	1	1	0	gph; phosphoglycolate phosphatase [EC:3.1.3.18]
K01915	3	2	4	3	3	3	3	3	2	2	1	1	0	0	1	0	0	2	0	1	1	2	2	2	2	2	1	2	2	1	1	1	2	0	1	1	1	1	2	3	2	2	2	1	glnA, GLUL; glutamine synthetase [EC:6.3.1.2]
K00600	3	1	1	2	1	1	1	1	1	1	1	1	1	1	1	1	1	2	0	1	1	1	1	1	2	1	1	1	1	2	2	2	1	1	1	2	1	2	2	1	1	1	2	1	glyA, SHMT; glycine hydroxymethyltransferase [EC:2.1.2.1]
K02437	3	3	3	2	3	3	0	1	1	3	3	3	1	1	1	1	1	3	0	3	1	2	1	2	1	0	3	1	0	3	3	3	1	0	1	1	0	1	1	1	1	1	1	1	gcvH, GCSH; glycine cleavage system H protein
K11381	1	2	2	0	2	1	0	1	1	0	0	0	0	1	1	1	1	0	0	0	0	1	0	1	0	0	1	0	0	1	2	2	0	0	0	0	0	0	0	0	0	0	0	0	bkdA; 2-oxoisovalerate dehydrogenase E1 component [EC:1.2.4.4]
K01692	2	1	3	3	3	2	0	2	1	4	3	2	0	0	0	0	0	0	1	1	0	0	0	0	0	0	0	0	0	1	1	1	1	1	0	2	0	2	2	1	2	2	2	0	paaF, echA; enoyl-CoA hydratase [EC:4.2.1.17]
K00074	1	4	3	3	3	4	0	2	1	2	2	2	0	1	1	1	1	0	0	0	0	0	0	0	0	0	0	0	0	3	3	3	3	2	1	1	0	2	2	1	2	1	2	1	paaH, hbd, fadB, mmgB; 3-hydroxybutyryl-CoA dehydrogenase [EC:1.1.1.157]
K01083	6	7	3	3	3	3	0	0	0	0	0	0	0	0	0	0	0	0	0	0	0	1	2	2	0	0	1	0	1	3	3	3	1	0	0	0	0	0	0	0	0	0	0	0	E3.1.3.8; 3-phytase [EC:3.1.3.8]
K02275	2	1	2	1	2	2	1	1	1	0	0	0	0	0	0	0	0	0	0	0	0	0	0	1	1	0	1	0	0	1	1	1	0	1	1	2	0	2	0	2	1	1	0	0	coxB, ctaC; cytochrome c oxidase subunit II [EC:1.9.3.1]
K00425	1	2	3	1	1	2	1	1	1	1	0	0	0	0	0	0	0	1	0	2	1	1	1	1	1	0	1	1	1	2	2	2	0	0	0	0	0	0	0	0	0	0	0	0	cydA; cytochrome bd ubiquinol oxidase subunit I [EC:7.1.1.7]
K00058	1	2	4	4	4	4	0	1	1	1	1	1	0	1	1	1	1	0	0	3	1	2	1	2	0	2	2	2	2	2	2	2	1	0	1	2	0	2	0	2	2	1	2	2	serA, PHGDH; D-3-phosphoglycerate dehydrogenase / 2-oxoglutarate reductase [EC:1.1.1.95 1.1.1.399]
K00261	2	3	1	1	1	1	0	1	1	1	1	1	0	1	1	1	0	0	0	0	0	1	1	1	1	0	0	0	0	1	1	1	0	1	1	1	0	1	1	1	1	1	1	0	GLUD1_2, gdhA; glutamate dehydrogenase (NAD(P)+) [EC:1.4.1.3]
K00059	5	5	4	5	5	4	4	2	3	5	3	2	1	1	3	3	1	1	2	5	1	3	4	3	1	2	2	4	4	5	5	5	1	1	4	2	1	2	2	4	5	2	2	2	fabG, OAR1; 3-oxoacyl-[acyl-carrier protein] reductase [EC:1.1.1.100]
K01126	1	2	2	2	2	2	1	1	1	3	1	1	0	1	1	1	1	0	0	2	1	2	1	2	4	1	0	3	4	0	0	0	2	0	1	1	1	1	0	1	1	1	1	1	E3.1.4.46, glpQ, ugpQ; glycerophosphoryl diester phosphodiesterase [EC:3.1.4.46]
K00432	1	1	1	2	2	2	0	0	0	1	1	1	0	0	0	0	0	0	0	0	1	1	0	1	0	1	1	2	1	0	0	0	0	0	0	0	1	0	1	0	0	0	0	0	gpx; glutathione peroxidase [EC:1.11.1.9]
K01524	1	2	2	1	2	1	0	0	0	1	1	1	1	1	1	1	1	1	0	0	1	0	1	1	1	1	0	2	1	2	2	2	1	1	1	1	0	1	1	1	1	1	1	1	ppx-gppA; exopolyphosphatase / guanosine-5'-triphosphate,3'-diphosphate pyrophosphatase [EC:3.6.1.11 3.6.1.40]
K01768	7	6	6	4	7	6	1	2	2	2	2	2	1	1	2	2	2	4	3	2	3	3	3	3	3	2	4	4	4	2	2	2	1	0	2	1	2	2	2	2	2	2	1	2	E4.6.1.1; adenylate cyclase [EC:4.6.1.1]
K03651	1	2	2	2	1	1	0	0	0	0	0	0	0	0	0	0	0	0	0	0	0	0	0	1	0	0	0	0	0	0	0	0	0	0	0	0	0	0	0	0	0	0	0	0	cpdA; 3',5'-cyclic-AMP phosphodiesterase [EC:3.1.4.53]
K01465	2	1	0	2	2	2	1	2	2	1	1	0	1	1	1	1	1	1	0	1	1	1	1	1	1	1	0	1	1	1	1	1	1	1	1	1	0	1	1	2	1	2	2	2	URA4, pyrC; dihydroorotase [EC:3.5.2.3]
K01953	5	7	12	11	8	9	3	0	0	1	0	1	0	5	2	2	1	2	4	5	2	1	3	2	4	7	2	4	2	5	5	5	3	1	1	1	2	2	1	0	0	1	0	1	asnB, ASNS; asparagine synthase (glutamine-hydrolysing) [EC:6.3.5.4]
K00259	2	3	3	3	3	3	2	1	1	2	2	2	2	1	1	2	2	2	0	1	1	0	1	0	0	0	0	0	0	2	2	2	1	1	1	1	0	1	1	1	1	1	1	1	ald; alanine dehydrogenase [EC:1.4.1.1]
K01940	2	2	2	2	2	4	0	1	1	1	1	1	0	1	1	1	0	1	0	0	1	0	1	1	1	1	1	1	1	0	0	0	0	1	1	0	0	0	1	0	1	0	3	0	argG, ASS1; argininosuccinate synthase [EC:6.3.4.5]
K01697	2	2	2	2	3	1	0	1	1	0	0	0	0	0	0	0	0	0	0	0	0	0	0	0	0	0	0	0	0	1	1	1	1	0	1	1	0	0	1	1	0	1	1	1	CBS; cystathionine beta-synthase [EC:4.2.1.22]
K01754	4	4	4	4	4	4	1	4	3	0	0	0	0	0	0	0	0	2	1	1	0	0	1	1	1	0	0	0	0	2	2	2	2	2	5	4	2	4	3	5	2	4	2	1	E4.3.1.19, ilvA, tdcB; threonine dehydratase [EC:4.3.1.19]
K01760	1	3	1	0	2	2	1	1	1	1	1	1	0	1	0	1	1	0	0	1	0	1	0	0	0	0	0	0	0	1	1	1	1	0	0	1	0	0	0	1	0	1	1	1	metC; cysteine-S-conjugate beta-lyase [EC:4.4.1.13]
K00797	0	2	2	1	1	1	3	1	2	2	1	1	1	1	1	1	1	2	1	1	2	2	1	1	2	1	0	0	0	1	1	1	0	0	1	2	0	2	1	3	2	1	0	0	speE, SRM; spermidine synthase [EC:2.5.1.16]
K00263	1	2	4	2	4	3	0	0	0	0	0	0	0	0	0	0	0	0	0	0	0	0	0	0	0	0	0	0	0	0	0	0	0	0	1	0	0	1	1	1	0	1	1	1	E1.4.1.9; leucine dehydrogenase [EC:1.4.1.9]
K01439	0	1	1	2	2	2	0	0	0	0	0	0	1	0	1	1	1	0	0	0	0	0	0	0	0	0	0	0	0	0	0	0	0	0	0	0	0	0	0	0	0	0	0	0	dapE; succinyl-diaminopimelate desuccinylase [EC:3.5.1.18]
K09251	1	1	1	1	2	2	0	0	0	0	0	0	0	0	0	0	0	0	0	0	0	0	0	0	0	0	0	0	0	0	0	0	0	0	0	0	0	0	0	0	0	0	0	0	patA; putrescine aminotransferase [EC:2.6.1.82]
K01476	2	1	2	2	1	1	0	0	0	0	0	0	0	0	0	0	0	0	0	0	0	0	0	0	0	0	0	0	0	1	1	1	1	1	2	2	1	0	2	1	2	2	2	1	E3.5.3.1, rocF, arg; arginase [EC:3.5.3.1]
K01438	1	2	2	2	2	2	0	0	0	0	0	0	0	0	0	0	0	0	0	0	0	0	0	0	0	0	0	0	0	0	0	0	0	0	1	0	0	0	1	0	1	1	0	0	argE; acetylornithine deacetylase [EC:3.5.1.16]
K01426	4	2	1	2	1	2	3	6	6	1	1	1	2	2	1	2	1	2	2	1	1	1	2	2	1	0	0	2	2	1	1	1	1	2	3	3	2	2	3	3	3	4	4	1	E3.5.1.4, amiE; amidase [EC:3.5.1.4]
K01775	2	2	3	2	2	2	3	2	2	1	1	1	1	1	1	1	1	0	1	2	2	2	1	1	3	2	0	2	1	2	2	2	3	1	3	2	3	2	2	3	2	2	2	1	alr; alanine racemase [EC:5.1.1.1]
K01921	4	4	4	4	4	4	1	1	1	1	1	1	1	1	1	1	0	0	0	1	2	2	1	2	3	1	2	3	1	1	1	1	0	1	1	0	0	1	1	1	1	1	1	1	ddl; D-alanine-D-alanine ligase [EC:6.3.2.4]
K03271	1	1	2	1	2	2	1	1	1	1	2	1	0	1	2	0	2	0	0	2	1	1	1	1	1	1	2	1	1	0	0	0	1	1	0	0	0	0	0	0	0	0	0	0	gmhA, lpcA; D-sedoheptulose 7-phosphate isomerase [EC:5.3.1.28]
K02843	1	4	4	3	4	3	0	1	1	4	3	2	3	4	3	3	2	1	0	1	3	4	4	3	2	2	3	3	3	0	0	0	0	0	0	0	0	0	0	0	0	0	0	0	waaF, rfaF; heptosyltransferase II [EC:2.4.-.-]
K07259	2	2	1	0	1	1	3	1	1	2	2	2	0	0	0	0	0	1	0	2	1	1	1	1	0	0	0	1	1	1	1	1	1	0	1	1	0	1	1	1	1	1	1	1	dacB; serine-type D-Ala-D-Ala carboxypeptidase/endopeptidase (penicillin-binding protein 4) [EC:3.4.16.4 3.4.21.-]
K06949	2	2	3	3	2	1	0	1	1	0	0	0	0	0	0	0	0	0	0	0	2	1	2	2	1	1	1	1	1	1	1	1	0	1	1	1	1	1	1	1	1	1	1	0	rsgA, engC; ribosome biogenesis GTPase / thiamine phosphate phosphatase [EC:3.6.1.- 3.1.3.100]
K14379	2	2	3	2	3	3	0	1	1	0	0	0	0	0	0	0	0	0	0	1	0	1	0	0	0	0	0	0	0	1	1	1	1	0	0	1	0	1	1	1	0	0	1	1	ACP5; tartrate-resistant acid phosphatase type 5 [EC:3.1.3.2]
K00652	2	2	2	2	2	2	0	1	2	1	2	1	1	2	2	2	2	0	0	1	1	1	1	1	0	1	1	1	1	0	0	0	2	1	1	0	0	1	2	1	2	2	1	1	bioF; 8-amino-7-oxononanoate synthase [EC:2.3.1.47]
K01113	2	2	2	3	2	2	0	2	1	1	0	0	0	0	0	0	0	1	0	0	0	1	2	4	2	0	0	1	1	0	0	0	0	0	1	2	2	2	3	0	2	1	1	1	phoD; alkaline phosphatase D [EC:3.1.3.1]
K03635	2	1	2	2	2	2	0	1	1	0	0	1	0	0	0	0	0	0	0	0	0	0	0	0	0	0	0	0	0	2	2	2	1	1	1	1	0	1	2	2	1	1	0	0	MOCS2B, moaE; molybdopterin synthase catalytic subunit [EC:2.8.1.12]
K01885	1	2	2	2	2	2	1	2	2	2	2	2	2	1	1	1	2	2	1	2	1	1	1	1	1	0	1	1	1	2	2	2	2	2	2	2	1	2	2	1	0	2	1	1	EARS, gltX; glutamyl-tRNA synthetase [EC:6.1.1.17]
K02492	0	1	3	2	2	2	1	1	1	1	2	2	0	1	0	0	1	0	0	1	0	0	0	2	0	0	0	0	0	0	1	1	1	0	2	1	0	1	1	1	2	2	0	0	hemA; glutamyl-tRNA reductase [EC:1.2.1.70]
K01845	0	1	3	1	2	2	0	2	2	2	1	1	0	2	0	1	0	1	0	1	0	0	1	2	0	0	0	1	1	1	1	1	1	0	1	1	1	1	1	1	1	1	0	0	hemL; glutamate-1-semialdehyde 2,1-aminomutase [EC:5.4.3.8]
K02495	2	0	1	3	3	3	1	2	2	1	0	1	0	1	0	0	1	0	0	0	0	0	0	0	0	0	0	0	0	2	2	2	2	0	2	2	0	2	2	1	2	3	1	0	hemN, hemZ; oxygen-independent coproporphyrinogen III oxidase [EC:1.3.98.3]
K03594	1	1	3	1	3	3	0	0	0	0	1	1	0	1	1	1	1	0	0	0	0	1	0	1	2	1	0	1	1	2	2	2	0	0	1	0	0	0	1	0	0	0	0	0	bfr; bacterioferritin [EC:1.16.3.1]
K01790	2	1	2	1	1	1	0	1	2	1	1	1	0	1	1	1	1	1	1	2	1	1	1	1	1	2	0	1	1	1	1	1	0	0	1	1	0	1	1	1	1	1	1	1	rfbC, rmlC; dTDP-4-dehydrorhamnose 3,5-epimerase [EC:5.1.3.13]
K00067	2	2	2	2	2	2	2	3	3	2	2	2	2	1	2	2	2	0	1	2	1	2	2	2	2	1	2	2	2	1	1	1	0	0	1	1	1	1	1	1	1	1	1	1	rfbD, rmlD; dTDP-4-dehydrorhamnose reductase [EC:1.1.1.133]
K01434	3	3	3	2	3	2	1	2	2	3	2	2	1	1	1	1	0	1	1	1	0	2	0	0	0	0	0	1	1	1	1	1	0	0	2	2	0	2	1	2	2	2	1	3	E3.5.1.11; penicillin amidase [EC:3.5.1.11]
K17836	2	2	3	3	3	3	1	0	0	0	0	0	0	0	0	0	0	1	1	1	0	3	0	0	1	0	0	1	1	0	0	0	0	0	0	0	0	0	0	0	0	0	0	0	penP; beta-lactamase class A [EC:3.5.2.6]
K01607	3	1	1	1	1	1	0	0	0	0	1	1	0	0	0	0	0	0	0	1	1	0	0	0	0	0	1	0	0	1	1	1	0	0	0	0	0	0	0	0	0	0	0	0	pcaC; 4-carboxymuconolactone decarboxylase [EC:4.1.1.44]
K01061	1	2	3	3	3	3	0	1	1	0	0	0	0	0	0	0	0	0	0	0	1	0	0	1	1	0	0	0	0	2	3	3	2	1	1	1	0	1	1	1	1	1	1	1	E3.1.1.45; carboxymethylenebutenolidase [EC:3.1.1.45]
K00485	0	1	1	2	2	2	0	0	0	0	0	0	0	0	0	0	0	0	0	0	0	0	0	0	0	0	0	0	0	1	1	1	0	0	0	0	0	0	0	0	0	0	0	0	FMO; dimethylaniline monooxygenase (N-oxide forming) [EC:1.14.13.8]
K02945	0	1	2	2	1	1	2	2	1	1	0	1	1	1	1	1	1	1	0	1	1	1	1	1	1	1	0	1	0	1	1	1	0	0	1	1	1	1	1	1	1	1	2	1	RP-S1, rpsA; small subunit ribosomal protein S1
K02970	1	1	2	2	2	2	1	1	1	1	1	1	1	0	1	1	0	1	2	1	1	1	1	1	1	1	1	2	2	1	1	1	0	0	1	1	0	0	1	1	1	1	0	1	RP-S21, MRPS21, rpsU; small subunit ribosomal protein S21
K00784	1	3	4	3	4	4	2	1	1	1	0	0	1	2	1	1	1	3	2	2	1	0	3	2	1	0	2	1	1	3	3	3	3	2	3	2	1	4	3	3	3	3	3	3	rnz; ribonuclease Z [EC:3.1.26.11]
K03101	2	3	2	2	2	2	1	1	1	1	1	1	1	1	1	1	1	2	2	3	1	1	1	1	2	1	1	3	2	1	1	1	2	2	2	2	0	2	2	2	2	2	2	2	lspA; signal peptidase II [EC:3.4.23.36]
K03636	2	2	1	2	2	2	0	3	3	0	1	1	0	0	0	0	0	0	0	0	0	0	0	0	0	0	1	0	0	2	2	2	2	2	3	2	1	2	1	2	3	3	1	2	moaD, cysO; sulfur-carrier protein
K03628	2	2	2	2	2	1	1	3	1	2	1	1	0	0	1	1	0	1	1	1	1	1	1	2	2	2	1	1	1	2	2	2	1	1	2	1	1	2	3	2	2	2	2	2	rho; transcription termination factor Rho
K18682	3	2	2	2	2	3	2	2	2	2	2	2	1	1	2	2	2	0	1	2	1	1	1	1	1	1	1	1	1	1	2	2	2	1	2	2	0	2	2	1	2	2	2	2	rny; ribonucrease Y [EC:3.1.-.-]
K07462	1	1	3	1	1	2	2	1	1	2	1	1	1	1	1	1	1	0	0	1	1	1	1	1	1	0	1	1	1	1	1	1	1	1	1	1	1	1	1	1	0	1	3	0	recJ; single-stranded-DNA-specific exonuclease [EC:3.1.-.-]
K03723	1	1	2	0	1	1	0	1	1	1	1	1	0	1	1	1	1	1	1	1	1	1	1	1	2	1	1	1	1	1	1	1	1	1	1	1	0	1	0	1	1	1	0	0	mfd; transcription-repair coupling factor (superfamily II helicase) [EC:3.6.4.-]
K03701	1	1	2	1	1	1	2	1	1	2	1	1	2	2	3	2	3	1	1	1	1	2	1	2	3	1	1	1	2	3	3	3	2	0	2	1	0	1	1	1	1	0	1	1	uvrA; excinuclease ABC subunit A
K03657	5	4	3	4	4	4	1	2	2	3	3	3	2	2	2	2	2	2	1	2	2	3	2	2	1	2	2	3	3	2	2	2	1	2	3	2	2	3	3	3	3	2	1	2	uvrD, pcrA; DNA helicase II / ATP-dependent DNA helicase PcrA [EC:3.6.4.12]
K10118	0	4	3	5	2	1	0	0	0	1	0	0	1	1	2	2	1	0	0	0	1	2	1	0	0	1	0	0	0	0	0	0	0	0	0	0	0	0	0	0	0	0	0	0	msmF; raffinose/stachyose/melibiose transport system permease protein
K02040	4	3	4	3	3	3	1	0	0	0	2	1	0	2	0	0	0	0	0	1	1	2	1	1	2	0	1	3	3	2	2	2	0	0	0	0	0	0	0	0	0	0	0	0	pstS; phosphate transport system substrate-binding protein
K07091	1	2	2	2	2	2	1	2	2	1	1	1	1	1	1	1	1	1	1	2	1	1	1	1	1	1	1	1	1	1	1	1	1	1	1	1	1	1	1	1	1	1	0	1	lptF; lipopolysaccharide export system permease protein
K11904	3	1	1	3	2	2	0	0	0	0	0	0	0	0	0	0	0	0	0	0	0	0	0	0	1	0	0	0	0	0	0	0	0	0	0	0	1	0	0	0	0	0	0	0	vgrG; type VI secretion system secreted protein VgrG
K04771	2	3	2	3	3	3	2	1	2	1	2	2	1	2	2	2	2	0	0	2	1	1	2	1	1	1	1	1	0	3	3	3	1	1	1	2	1	2	1	1	2	2	1	2	degP, htrA; serine protease Do [EC:3.4.21.107]
K07646	1	1	2	1	2	1	0	0	0	0	0	0	0	0	0	0	0	0	0	0	1	0	0	0	0	0	0	1	0	0	0	0	0	0	0	0	0	0	0	0	0	0	0	0	kdpD; two-component system, OmpR family, sensor histidine kinase KdpD [EC:2.7.13.3]
K08082	3	0	1	2	2	2	0	0	0	0	0	0	1	1	1	0	0	0	0	0	0	0	0	0	0	0	0	0	0	1	1	1	0	0	1	1	0	1	0	1	1	1	1	1	algZ; two-component system, LytTR family, sensor histidine kinase AlgZ [EC:2.7.13.3]
K01467	3	3	4	3	4	4	0	0	0	0	1	1	0	0	0	0	0	0	0	0	1	1	0	0	0	0	0	1	1	1	1	1	0	0	1	1	1	1	1	1	2	3	1	0	ampC; beta-lactamase class C [EC:3.5.2.6]
K13598	2	2	1	2	2	2	0	0	0	0	0	0	0	0	0	0	0	1	1	1	1	1	1	1	1	1	1	0	0	1	1	1	0	1	1	1	1	1	1	1	0	1	1	1	ntrY; two-component system, NtrC family, nitrogen regulation sensor histidine kinase NtrY [EC:2.7.13.3]
K13599	1	2	1	2	2	1	0	0	0	2	1	1	1	0	1	1	2	1	0	2	0	1	1	1	0	1	0	1	1	1	1	1	0	0	1	1	0	1	0	1	1	1	0	1	ntrX; two-component system, NtrC family, nitrogen regulation response regulator NtrX
K02584	1	4	3	3	3	2	2	1	1	2	2	2	0	0	0	0	0	0	0	0	1	1	1	1	2	1	1	1	1	3	3	3	1	1	1	1	0	1	1	0	1	0	1	2	nifA; Nif-specific regulatory protein
K01991	8	6	7	9	6	7	3	5	4	4	4	3	1	3	4	4	4	3	2	4	4	4	5	4	6	4	2	6	6	5	5	5	2	1	4	4	5	5	5	4	6	5	3	6	wza, gfcE; polysaccharide biosynthesis/export protein
K07165	2	3	2	1	2	1	2	1	0	0	1	1	0	0	0	0	0	0	0	3	0	0	0	5	0	0	0	1	1	2	2	2	1	2	1	0	0	0	0	1	0	2	0	0	fecR; transmembrane sensor
K04564	2	2	2	2	2	4	1	1	1	0	0	0	0	0	0	0	0	1	0	1	1	2	1	1	0	1	0	1	0	1	1	1	0	0	1	1	1	1	1	1	1	1	1	1	SOD2; superoxide dismutase, Fe-Mn family [EC:1.15.1.1]
K00477	1	2	3	3	4	4	0	1	1	0	0	0	0	0	0	0	0	0	0	0	0	0	0	0	0	0	0	0	0	2	2	2	1	0	0	0	0	0	0	0	0	0	0	0	PHYH; phytanoyl-CoA hydroxylase [EC:1.14.11.18]
K03671	3	3	3	2	3	3	2	2	2	1	1	1	0	1	1	0	1	1	1	2	2	2	3	3	1	2	2	3	3	2	2	2	0	0	2	1	1	4	2	2	4	3	2	2	trxA; thioredoxin 1
K01448	5	6	5	7	6	6	3	4	3	1	1	1	1	1	2	3	0	4	2	6	3	5	4	5	4	4	1	4	4	4	4	4	2	4	4	3	3	3	2	3	3	4	3	4	amiABC; N-acetylmuramoyl-L-alanine amidase [EC:3.5.1.28]
K12132	19	20	19	21	21	21	3	21	11	1	1	1	0	0	0	0	0	0	0	3	4	2	4	2	10	6	1	4	2	13	16	16	6	4	13	11	10	18	17	19	17	22	7	15	prkC, stkP; eukaryotic-like serine/threonine-protein kinase [EC:2.7.11.1]
K04757	7	8	11	10	11	11	6	6	8	6	6	6	4	5	5	5	4	5	4	7	6	5	5	5	6	5	4	5	4	9	9	9	4	5	10	8	5	8	10	10	9	8	8	9	rsbW; serine/threonine-protein kinase RsbW [EC:2.7.11.1]
K08884	19	18	17	19	19	20	2	19	11	1	1	1	0	0	0	0	0	0	0	4	4	2	4	2	10	6	2	4	2	13	16	16	6	4	12	11	10	18	17	19	17	22	7	14	K08884; serine/threonine protein kinase, bacterial [EC:2.7.11.1]
K02482	2	3	3	3	3	2	4	1	0	3	3	3	0	2	2	2	1	2	2	2	1	3	2	3	1	1	1	2	2	2	2	2	1	2	4	1	1	0	1	2	4	4	0	2	K02482; two-component system, NtrC family, sensor kinase [EC:2.7.13.3]
K20074	0	2	1	3	2	2	0	1	0	0	0	0	0	0	0	0	0	1	0	2	1	0	0	0	0	1	0	0	0	3	3	3	2	0	4	1	1	1	3	4	3	4	4	2	prpC, phpP; PPM family protein phosphatase [EC:3.1.3.16]
K22684	1	3	2	1	2	2	0	0	0	0	0	0	0	0	0	0	1	0	0	0	1	0	0	0	0	1	0	1	1	0	0	0	0	0	0	0	0	0	0	0	0	0	0	0	MCA1; metacaspase-1 [EC:3.4.22.-]
K05996	2	2	1	3	3	3	0	0	0	1	1	1	0	0	0	0	0	0	0	1	1	0	0	0	2	0	0	0	0	0	0	0	0	0	0	0	0	1	1	0	0	0	0	0	cpt; carboxypeptidase T [EC:3.4.17.18]
K07263	7	5	6	6	6	7	1	8	6	4	3	3	0	2	3	3	3	3	1	1	1	4	3	7	0	0	5	7	4	5	5	5	2	2	5	4	2	3	5	7	5	6	5	5	pqqL; zinc protease [EC:3.4.24.-]
K01273	3	3	6	5	5	5	2	4	5	0	0	0	0	0	0	0	0	2	1	3	0	3	2	2	1	1	0	2	2	4	4	4	1	1	4	3	1	3	5	2	3	2	5	4	DPEP; membrane dipeptidase [EC:3.4.13.19]
K19689	2	3	3	3	3	3	1	2	2	2	1	1	1	1	2	1	0	1	0	2	0	2	2	1	2	0	2	2	2	0	0	0	3	2	2	0	1	2	1	2	3	2	1	1	ampS, pepS, ampT; aminopeptidase [EC:3.4.11.-]
K23010	2	2	2	1	2	2	0	0	0	1	0	0	1	0	1	1	1	0	0	1	1	0	0	1	1	0	0	1	1	0	0	0	0	0	0	0	0	0	0	0	0	0	0	0	OMA1; metalloendopeptidase OMA1, mitochondrial [EC:3.4.24.-]
K06402	2	3	4	4	3	3	0	0	0	0	0	0	0	0	0	0	0	0	0	1	1	0	1	0	1	0	0	0	0	2	2	2	0	0	0	0	0	0	0	0	0	0	0	0	spoIVFB; stage IV sporulation protein FB [EC:3.4.24.-]
K01266	4	3	4	8	5	7	2	3	3	1	1	1	0	0	0	0	0	1	0	2	1	1	0	2	1	1	1	1	1	2	2	2	1	2	2	0	1	2	2	2	2	2	2	2	dmpA, dap; D-aminopeptidase [EC:3.4.11.19]
K01303	1	2	2	2	3	3	4	3	5	3	3	2	1	0	1	0	1	1	1	3	1	1	1	2	0	1	1	1	1	3	3	3	1	2	6	4	0	4	7	3	5	2	2	2	APEH; acylaminoacyl-peptidase [EC:3.4.19.1]
K03797	3	3	4	4	4	4	3	3	3	3	4	5	1	3	3	3	3	3	3	2	4	3	2	3	4	2	2	3	3	3	3	3	1	3	3	3	2	4	5	3	4	4	4	3	E3.4.21.102, prc, ctpA; carboxyl-terminal processing protease [EC:3.4.21.102]
K08676	3	2	2	2	2	2	1	5	1	4	3	4	1	1	1	1	1	1	6	1	1	0	2	1	2	0	0	2	2	1	1	1	0	0	0	2	0	3	2	4	1	0	0	0	tri; tricorn protease [EC:3.4.21.-]
K04773	2	3	3	2	3	3	1	2	1	2	2	2	0	0	1	1	1	1	1	2	2	1	1	1	1	1	1	1	1	1	1	1	2	1	1	1	0	2	2	1	1	1	2	0	sppA; protease IV [EC:3.4.21.-]
K20444	3	5	4	4	4	3	3	2	1	3	2	2	1	2	2	1	2	0	0	0	2	0	1	1	2	1	0	2	2	3	3	3	0	0	2	2	5	3	2	2	3	2	3	2	rfbC; O-antigen biosynthesis protein [EC:2.4.1.-]
K08307	3	2	2	2	2	2	1	1	1	1	1	1	1	1	1	1	1	1	1	2	2	2	1	1	1	1	0	1	1	2	2	2	2	0	3	1	1	1	2	0	2	2	2	2	mltD, dniR; membrane-bound lytic murein transglycosylase D [EC:4.2.2.-]
K02529	4	6	6	6	6	4	1	0	0	4	3	4	1	1	1	1	1	1	1	5	3	6	4	6	2	3	3	5	6	0	0	0	0	1	0	0	0	1	1	0	0	0	0	0	lacI, galR; LacI family transcriptional regulator
K03892	2	3	4	2	3	3	1	0	0	0	1	0	0	1	0	1	0	3	0	2	1	1	1	1	2	0	1	1	1	1	1	1	0	0	1	0	1	1	1	0	0	2	1	1	arsR; ArsR family transcriptional regulator, arsenate/arsenite/antimonite-responsive transcriptional repressor
K03709	2	1	2	2	2	2	0	2	2	0	1	1	0	0	0	0	0	1	1	2	0	1	0	2	0	0	1	0	0	3	3	3	2	2	2	1	4	0	1	1	2	1	1	0	troR; DtxR family transcriptional regulator, Mn-dependent transcriptional regulator
K07726	2	0	0	3	3	4	0	3	5	0	0	0	0	0	0	0	0	0	0	0	0	0	0	0	0	0	0	0	1	0	0	0	0	1	0	0	0	0	0	0	0	0	0	0	K07726; putative transcriptional regulator
K03088	22	21	28	27	25	24	12	21	21	8	5	5	3	3	3	4	3	7	9	12	12	10	15	22	13	14	14	15	13	24	25	25	8	12	18	17	13	18	17	22	20	23	18	16	rpoE; RNA polymerase sigma-70 factor, ECF subfamily
K07315	19	28	26	28	28	22	7	20	20	5	7	7	4	5	7	6	3	8	9	12	13	12	14	11	17	8	7	13	13	21	21	21	6	13	17	18	12	18	22	16	23	21	11	12	rsbU_P; phosphoserine phosphatase RsbU/P [EC:3.1.3.3]
K04749	9	11	13	12	13	11	9	10	10	9	8	8	5	8	7	8	7	8	6	7	8	6	8	8	10	9	7	9	7	9	9	9	8	8	9	9	6	10	9	9	10	10	9	9	rsbV; anti-sigma B factor antagonist
K06178	1	2	2	2	2	2	0	1	1	1	1	1	1	0	0	1	1	1	0	1	2	2	1	1	2	1	1	1	1	0	0	0	1	0	1	1	0	1	1	1	1	1	1	1	rluB; 23S rRNA pseudouridine2605 synthase [EC:5.4.99.22]
K14415	3	2	2	3	2	2	1	1	1	1	1	1	1	1	1	1	1	1	0	1	1	1	1	1	1	1	1	1	1	1	1	1	1	2	1	1	1	1	1	1	1	1	1	1	RTCB, rtcB; tRNA-splicing ligase RtcB (3'-phosphate/5'-hydroxy nucleic acid ligase) [EC:6.5.1.8]
K02355	0	2	2	2	2	1	1	1	2	2	2	2	2	1	2	2	1	2	2	3	3	2	3	3	3	1	2	3	3	1	1	1	2	1	2	2	1	2	2	0	2	2	1	2	fusA, GFM, EFG; elongation factor G
K04078	1	3	3	3	3	3	3	3	1	3	1	1	1	1	3	1	1	2	2	1	2	2	2	2	1	2	1	2	1	3	3	3	0	1	3	2	1	3	1	3	3	3	2	3	groES, HSPE1; chaperonin GroES
K03593	2	2	2	2	2	3	1	2	2	1	1	1	1	2	2	2	2	1	0	1	0	1	1	1	1	0	1	1	1	1	1	1	1	0	4	3	1	2	2	2	2	2	1	0	mrp, NUBPL; ATP-binding protein involved in chromosome partitioning
K00567	1	1	2	2	2	2	0	1	1	1	0	0	0	0	0	0	0	1	2	0	1	1	0	1	1	0	0	1	1	0	0	0	1	1	1	1	1	1	1	0	1	1	1	1	ogt, MGMT; methylated-DNA-[protein]-cysteine S-methyltransferase [EC:2.1.1.63]
K03574	6	4	5	5	5	5	4	3	3	3	5	5	2	1	2	3	2	2	0	1	1	1	1	2	1	0	1	2	3	3	3	3	1	1	2	1	1	1	1	2	2	2	1	2	mutT, NUDT15, MTH2; 8-oxo-dGTP diphosphatase [EC:3.6.1.55]
K03547	2	2	2	2	1	2	1	1	1	1	1	2	0	1	1	1	1	1	1	1	1	1	1	2	0	1	1	2	2	1	1	1	0	1	1	1	2	1	1	1	1	1	1	1	sbcD, mre11; DNA repair protein SbcD/Mre11
K07152	2	3	2	2	2	2	0	2	2	0	0	0	0	0	0	0	0	0	0	0	0	0	0	2	2	0	1	0	0	1	1	1	1	2	0	2	3	2	1	1	0	2	0	0	SCO1; protein SCO1
K06147	5	5	5	4	5	3	1	1	2	3	3	3	1	3	3	4	2	0	0	0	1	3	3	2	1	4	2	4	4	1	1	1	2	0	2	2	0	3	1	0	2	2	2	0	ABCB-BAC; ATP-binding cassette, subfamily B, bacterial
K02027	2	8	4	4	2	1	1	1	0	4	2	1	3	2	4	4	2	0	0	1	1	3	2	0	2	1	1	1	1	0	0	0	0	0	0	0	0	0	0	1	1	1	0	0	ABC.MS.S; multiple sugar transport system substrate-binding protein
K02025	4	6	6	10	4	4	2	1	0	4	3	3	3	2	5	5	4	1	0	1	2	4	3	0	4	2	1	3	3	0	0	0	0	0	0	0	0	0	1	1	1	1	0	1	ABC.MS.P; multiple sugar transport system permease protein
K02026	3	8	6	7	4	4	2	1	0	5	3	3	2	2	5	5	4	1	0	2	2	4	3	0	4	1	1	3	2	0	0	0	0	0	0	0	0	1	1	0	1	1	0	1	ABC.MS.P1; multiple sugar transport system permease protein
K02057	2	1	3	2	3	3	0	0	0	0	0	0	0	0	0	0	0	0	0	0	0	0	0	0	0	0	0	0	0	0	0	0	0	0	0	0	0	0	0	0	0	0	0	0	ABC.SS.P; simple sugar transport system permease protein
K02004	32	29	50	56	44	41	6	18	20	7	11	11	3	7	6	7	7	2	6	18	10	11	11	19	23	14	5	16	13	48	49	49	8	7	27	8	5	9	9	23	29	24	24	21	ABC.CD.P; putative ABC transport system permease protein
K02003	9	11	11	10	11	9	3	5	5	2	5	5	3	4	3	3	2	1	3	2	4	5	3	9	3	2	3	4	4	7	7	7	2	3	8	3	3	2	4	6	8	6	7	6	ABC.CD.A; putative ABC transport system ATP-binding protein
K01992	9	8	9	9	8	8	2	5	5	2	7	6	2	2	3	3	5	5	3	3	5	6	6	7	6	4	3	5	5	6	6	6	1	0	7	3	1	5	4	4	5	5	2	4	ABC-2.P; ABC-2 type transport system permease protein
K01990	12	15	14	14	13	12	4	11	8	4	10	9	4	5	4	5	3	5	5	4	7	4	7	12	6	5	5	5	6	8	9	9	3	2	7	8	3	9	6	6	8	9	6	3	ABC-2.A; ABC-2 type transport system ATP-binding protein
K03327	1	3	3	3	3	3	3	4	3	2	3	3	0	3	2	2	1	2	1	2	3	3	3	3	3	3	2	3	4	3	3	3	1	1	4	5	3	3	4	4	5	4	3	2	TC.MATE, SLC47A, norM, mdtK, dinF; multidrug resistance protein, MATE family
K07114	5	8	6	6	6	6	3	3	3	1	5	5	2	0	2	2	0	2	1	7	3	3	4	5	2	2	2	3	2	3	3	3	5	4	3	3	2	4	5	3	4	3	3	3	yfbK; Ca-activated chloride channel homolog
K03561	4	10	8	9	8	7	5	6	6	6	6	6	3	4	6	7	6	4	3	6	5	3	5	5	5	4	4	3	3	7	7	7	6	7	5	5	5	5	6	5	5	5	3	4	exbB; biopolymer transport protein ExbB
K03559	10	16	12	13	12	12	6	9	12	10	10	10	5	8	11	11	11	7	5	12	7	4	8	8	7	5	5	5	3	11	11	11	9	10	8	8	8	6	9	8	8	8	6	6	exbD; biopolymer transport protein ExbD
K03286	6	5	7	5	7	8	4	2	2	2	2	2	1	1	1	1	1	4	2	2	5	3	2	3	1	3	2	6	5	2	2	2	1	1	2	2	1	1	2	1	2	2	1	1	TC.OOP; OmpA-OmpF porin, OOP family
K06076	7	10	7	7	8	8	3	4	5	4	5	5	0	2	3	4	2	7	4	9	3	5	10	7	7	4	7	5	5	5	5	5	5	2	5	4	6	6	6	6	7	5	4	5	fadL; long-chain fatty acid transport protein
K02014	16	22	18	19	20	16	13	17	15	11	17	15	3	5	10	8	8	15	8	21	10	15	13	26	23	14	13	21	19	9	10	10	5	6	9	8	5	15	10	4	9	11	12	6	TC.FEV.OM; iron complex outermembrane recepter protein
K17713	3	1	4	5	4	4	0	0	1	1	1	1	0	0	0	0	0	1	0	1	1	0	0	1	1	1	0	0	0	3	3	3	1	1	2	4	0	4	5	2	2	2	1	0	bamB; outer membrane protein assembly factor BamB
K03498	2	2	2	2	2	2	2	1	1	1	1	1	1	1	1	1	1	1	1	2	2	1	2	1	1	2	1	1	2	2	2	2	1	2	1	1	1	1	1	1	1	1	1	1	trkH, trkG, ktrB; trk system potassium uptake protein
K07240	0	1	2	1	1	2	0	0	0	1	0	0	0	0	0	0	0	1	0	0	1	0	0	0	0	0	1	0	0	1	2	2	0	0	0	0	0	0	0	0	0	0	0	0	chrA; chromate transporter
K03321	0	2	2	1	2	2	0	1	1	0	0	0	0	0	1	1	1	0	0	0	0	0	0	0	0	0	0	0	0	1	1	1	1	1	2	2	2	2	1	1	2	2	1	1	TC.SULP; sulfate permease, SulP family
K03548	1	2	2	2	2	1	1	0	0	1	1	1	0	0	1	1	1	0	1	0	0	2	1	2	0	0	0	2	1	1	1	1	1	0	1	0	1	0	1	1	1	1	0	0	perM; putative permease
K03832	6	9	10	8	9	9	4	9	10	7	6	5	3	2	3	3	2	5	2	4	4	4	6	9	6	6	6	5	5	14	14	14	3	6	13	5	7	6	9	7	7	8	8	5	tonB; periplasmic protein TonB
K03641	10	8	9	11	6	6	4	9	8	6	6	6	2	3	3	3	3	4	2	3	6	3	5	4	6	2	6	3	4	12	12	12	2	4	7	5	4	10	6	10	8	8	7	5	tolB; TolB protein
K04758	1	1	3	3	3	3	0	2	2	1	2	2	0	1	1	1	1	1	0	3	0	1	1	1	1	0	1	1	1	2	2	2	2	3	2	2	5	1	2	3	2	2	2	1	feoA; ferrous iron transport protein A
K04759	3	2	4	3	3	3	0	2	4	1	2	2	0	2	1	1	1	2	1	3	1	1	1	1	1	0	1	1	1	4	4	4	2	3	1	1	3	1	1	3	1	1	1	1	feoB; ferrous iron transport protein B
K18814	4	3	5	5	5	5	0	0	0	2	0	0	1	3	1	3	1	0	0	0	1	2	3	3	1	1	4	4	4	2	2	2	1	1	2	1	2	3	2	0	0	0	0	0	ictB; putative inorganic carbon (hco3(-)) transporter
K02483	2	1	2	2	2	2	1	0	0	1	0	0	0	0	0	0	0	1	0	0	0	0	0	1	0	0	0	0	0	0	0	0	1	0	0	0	0	0	0	0	0	0	0	0	K02483; two-component system, OmpR family, response regulator
K02477	4	2	3	4	5	5	1	2	1	0	1	0	1	1	1	1	0	0	0	0	0	1	0	2	0	0	2	1	0	4	4	4	1	2	4	3	1	2	4	4	4	5	3	2	K02477; two-component system, LytTR family, response regulator
K02481	8	11	11	6	12	6	11	6	5	14	13	12	5	7	9	9	9	11	8	13	3	10	4	9	3	4	8	6	6	12	12	12	6	5	11	9	7	9	7	7	12	12	7	8	K02481; two-component system, NtrC family, response regulator
K09951	1	2	0	2	3	2	3	0	0	3	2	1	1	1	1	2	0	0	0	1	0	0	0	2	1	0	0	2	0	1	1	1	0	0	0	0	0	0	0	0	0	0	0	1	cas2; CRISPR-associated protein Cas2
K01153	5	3	8	3	3	4	0	3	0	0	1	0	0	1	0	0	0	0	0	1	1	0	0	3	1	2	0	3	1	0	0	0	1	1	0	0	0	2	1	0	1	0	0	0	hsdR; type I restriction enzyme, R subunit [EC:3.1.21.3]
K01154	2	3	6	3	3	4	0	3	0	0	0	0	0	0	0	0	2	1	0	0	0	0	3	6	2	0	0	3	2	1	1	1	0	1	0	0	0	1	0	0	1	0	1	0	hsdS; type I restriction enzyme, S subunit [EC:3.1.21.3]
K03427	3	3	7	5	4	5	0	3	1	0	2	1	0	0	2	1	1	1	0	1	0	0	2	4	3	3	0	2	2	1	1	1	0	1	0	1	0	1	0	0	2	0	1	1	hsdM; type I restriction enzyme M protein [EC:2.1.1.72]
K01155	0	0	0	0	0	0	0	0	0	0	1	0	0	0	0	0	0	0	0	0	0	0	0	0	0	0	0	0	0	0	0	0	0	0	0	0	0	0	0	0	0	0	0	0	E3.1.21.4; type II restriction enzyme [EC:3.1.21.4]
K07317	1	1	1	0	1	1	0	0	0	0	0	0	0	0	0	0	0	0	1	0	1	0	0	1	0	0	1	0	0	0	0	0	0	0	0	0	0	0	0	0	0	0	0	0	K07317; adenine-specific DNA-methyltransferase [EC:2.1.1.72]
K07319	1	0	1	0	1	1	0	0	0	1	1	0	0	0	0	0	0	0	0	0	0	0	0	0	0	0	0	0	0	1	1	1	0	0	0	0	0	0	0	0	0	0	1	0	yhdJ; adenine-specific DNA-methyltransferase [EC:2.1.1.72]
K00571	3	1	2	0	2	3	0	2	0	2	1	0	0	1	0	0	0	1	0	1	1	0	0	2	0	0	0	1	0	2	2	2	0	0	0	0	0	0	0	0	0	0	2	1	E2.1.1.72; site-specific DNA-methyltransferase (adenine-specific) [EC:2.1.1.72]
K01156	5	3	4	3	3	6	0	2	1	0	0	0	0	0	0	0	0	0	0	1	0	0	1	0	0	0	0	0	0	0	0	0	0	0	0	0	0	0	1	0	0	0	1	1	res; type III restriction enzyme [EC:3.1.21.5]
K07316	3	2	2	0	4	4	0	3	0	0	1	0	0	0	0	0	0	0	0	0	0	0	1	0	0	0	0	0	0	0	0	0	0	0	1	0	0	0	0	0	0	0	1	2	mod; adenine-specific DNA-methyltransferase [EC:2.1.1.72]
K07171	14	7	8	7	8	5	0	9	10	0	0	0	0	0	0	0	0	0	0	2	4	0	0	6	1	2	3	1	1	5	5	5	1	0	1	0	0	1	3	5	5	5	4	3	mazF, ndoA, chpA; mRNA interferase MazF [EC:3.1.-.-]
K06218	5	0	2	3	5	5	0	0	0	0	0	0	0	1	0	0	0	1	1	0	1	0	1	2	0	0	0	1	0	1	1	1	0	0	0	0	0	0	1	0	0	0	0	0	relE, stbE; mRNA interferase RelE/StbE
K18843	7	3	6	5	8	8	0	2	3	0	2	0	0	1	2	1	1	0	0	0	0	0	0	2	0	0	0	0	0	2	2	2	0	0	2	1	1	0	0	2	3	5	3	2	hicB; antitoxin HicB
K19092	3	1	6	5	5	5	0	1	1	0	0	0	0	0	0	0	1	0	1	0	0	1	2	3	0	1	0	1	0	2	2	2	0	1	1	0	0	1	1	3	5	2	1	2	parE1_3_4; toxin ParE1/3/4
K07746	1	0	1	0	0	0	0	0	0	0	0	0	0	0	0	0	0	0	0	0	0	0	0	0	0	0	0	0	0	0	0	0	0	0	1	0	0	1	0	0	1	0	1	0	parD1_3_4; antitoxin ParD1/3/4
K07341	1	0	0	1	3	4	0	0	0	0	0	0	0	0	0	0	0	1	0	0	0	0	0	1	0	0	0	1	0	2	2	2	0	0	2	0	0	0	1	1	1	1	1	1	doc; death on curing protein
K19166	1	0	0	0	0	0	0	1	0	0	0	0	0	0	0	0	0	0	0	0	0	0	0	0	0	0	0	0	0	0	0	0	0	0	0	0	0	0	0	1	0	0	0	1	higB; mRNA interferase HigB [EC:3.1.-.-]
K07334	2	1	0	0	0	1	0	1	1	0	0	0	0	0	0	0	0	0	0	0	0	0	2	2	0	0	0	0	1	2	2	2	0	0	0	0	0	0	0	1	1	1	0	2	higB-1; toxin HigB-1
K21498	2	1	4	2	2	3	0	6	7	0	1	1	0	0	0	0	0	0	0	0	3	0	5	3	1	0	0	3	1	4	4	4	0	0	2	0	0	0	1	4	2	3	0	3	higA-1; antitoxin HigA-1
K00344	1	4	4	1	4	4	0	0	1	0	0	0	1	0	0	0	0	0	0	0	0	1	0	1	0	0	1	1	1	1	1	1	1	1	3	1	1	1	1	1	5	4	2	3	qor, CRYZ; NADPH:quinone reductase [EC:1.6.5.5]
K07304	2	0	2	1	2	2	0	2	2	1	0	0	0	0	0	0	0	0	1	2	1	1	2	1	1	1	1	1	1	1	1	1	1	0	1	1	1	1	0	2	1	1	1	0	msrA; peptide-methionine (S)-S-oxide reductase [EC:1.8.4.11]
K03564	0	1	1	2	2	2	2	0	0	1	0	0	0	0	0	0	0	1	0	2	1	1	1	2	1	2	1	2	1	1	1	1	0	0	0	0	0	0	0	0	0	0	0	0	BCP, PRXQ, DOT5; peroxiredoxin Q/BCP [EC:1.11.1.15]
K04069	1	2	2	2	2	2	4	1	1	2	2	2	2	3	2	3	3	3	2	2	3	3	5	2	3	2	4	4	4	1	1	1	0	0	1	1	1	1	1	1	1	1	1	0	pflA, pflC, pflE; pyruvate formate lyase activating enzyme [EC:1.97.1.4]
K07755	2	2	2	1	2	2	0	2	2	0	0	0	0	0	0	0	0	0	0	0	0	1	0	0	0	0	1	1	1	2	2	2	1	1	2	0	1	2	2	2	2	1	2	2	AS3MT; arsenite methyltransferase [EC:2.1.1.137]
K00612	1	2	2	3	2	2	1	1	1	1	1	1	0	0	0	0	0	0	1	2	3	2	1	2	2	3	1	3	4	2	2	2	2	2	1	0	1	0	1	1	0	1	1	0	E2.1.3.-; carbamoyltransferase [EC:2.1.3.-]
K13292	0	3	3	3	3	3	1	3	3	2	4	4	1	1	1	1	1	0	0	2	2	1	1	1	2	2	1	1	1	1	1	1	1	2	1	1	1	1	1	1	1	1	1	1	lgt, umpA; phosphatidylglycerol---prolipoprotein diacylglyceryl transferase [EC:2.5.1.145]
K03734	3	1	2	3	2	2	1	1	1	1	0	0	1	1	0	1	0	1	1	2	2	3	2	3	2	1	1	2	2	0	0	0	2	2	1	2	2	3	4	1	2	1	2	1	apbE; FAD:protein FMN transferase [EC:2.7.1.180]
K05962	8	4	9	8	10	9	5	6	6	2	2	2	4	3	4	4	3	1	7	9	3	1	1	1	3	0	5	2	1	4	5	5	4	2	3	5	1	9	9	4	5	4	2	5	E2.7.13.1; protein-histidine pros-kinase [EC:2.7.13.1]
K07214	3	3	4	4	5	5	0	0	0	0	1	0	0	0	0	0	0	0	1	0	3	4	0	0	5	0	3	1	1	4	4	4	2	1	3	4	1	3	4	1	2	1	2	0	fes; iron(III)-enterobactin esterase [EC:3.1.1.108]
K07107	5	3	5	6	5	4	2	2	2	2	2	2	1	1	1	1	1	1	2	2	1	1	1	3	1	1	0	1	1	3	3	3	0	1	3	2	0	1	2	3	3	2	2	2	ybgC; acyl-CoA thioester hydrolase [EC:3.1.2.-]
K01181	1	2	3	3	3	3	0	1	1	0	0	0	1	0	0	0	0	1	0	0	4	2	0	1	5	4	3	2	0	0	0	0	0	0	0	0	0	0	0	0	0	0	0	0	E3.2.1.8, xynA; endo-1,4-beta-xylanase [EC:3.2.1.8]
K15532	1	2	2	2	3	3	0	0	0	0	0	0	0	0	0	0	0	0	0	2	0	1	0	2	0	0	3	3	3	0	0	0	0	0	0	0	0	0	0	0	0	0	0	0	yteR, yesR; unsaturated rhamnogalacturonyl hydrolase [EC:3.2.1.172]
K01286	2	4	3	4	4	3	1	7	5	1	1	1	0	0	0	0	0	0	1	1	1	1	2	2	2	1	2	0	1	3	3	3	0	0	4	3	3	2	5	1	6	4	1	3	E3.4.16.4; D-alanyl-D-alanine carboxypeptidase [EC:3.4.16.4]
K06015	3	2	2	2	2	2	2	5	4	0	0	0	0	0	0	0	0	1	1	1	0	1	0	0	0	0	0	1	1	2	2	2	0	0	1	2	2	3	2	2	3	2	2	1	E3.5.1.81; N-acyl-D-amino-acid deacylase [EC:3.5.1.81]
K01462	1	1	2	0	2	2	2	1	1	1	2	2	0	0	1	1	0	1	1	1	1	1	1	1	1	1	1	1	1	1	1	1	0	0	2	1	1	1	1	1	1	1	1	2	PDF, def; peptide deformylase [EC:3.5.1.88]
K09022	3	3	2	3	1	2	3	3	3	1	1	1	1	1	1	1	1	0	0	0	1	2	2	1	1	1	1	2	2	3	3	3	1	0	3	1	0	2	2	4	4	2	1	2	ridA, tdcF, RIDA; 2-iminobutanoate/2-iminopropanoate deaminase [EC:3.5.99.10]
K01534	1	1	2	2	2	1	0	1	1	0	2	2	0	0	0	0	0	1	0	0	0	0	0	1	0	0	0	0	0	1	1	1	1	0	1	0	1	1	1	1	0	1	1	1	zntA; Cd2+/Zn2+-exporting ATPase [EC:3.6.3.3 7.2.2.12]
K03924	3	3	4	4	4	4	2	3	4	2	2	2	2	2	2	1	1	2	1	2	2	2	2	2	2	3	0	2	1	4	4	4	2	3	3	3	2	4	3	4	3	3	2	3	moxR; MoxR-like ATPase [EC:3.6.3.-]
K22205	3	3	3	3	3	3	1	1	1	1	1	1	0	1	1	1	1	1	0	1	1	0	1	1	1	0	0	0	0	1	1	1	2	2	1	1	0	1	1	1	1	1	1	1	K22205; S-adenosyl-L-methionine hydrolase (adenosine-forming) [EC:3.13.1.8]
K10822	7	12	10	9	14	11	0	2	1	8	6	7	3	1	5	3	2	3	3	2	5	3	1	2	5	2	2	5	3	5	5	5	3	3	4	3	3	3	4	4	5	6	3	2	E7.4.2.2; nonpolar-amino-acid-transporting ATPase [EC:7.4.2.2]
K00184	1	2	2	3	2	2	2	1	1	0	0	0	0	0	0	0	0	0	0	1	0	0	0	1	1	0	1	0	0	0	0	0	1	0	1	1	0	1	2	1	0	0	1	0	K00184; prokaryotic molybdopterin-containing oxidoreductase family, iron-sulfur binding subunit
K04028	1	3	3	2	3	3	0	2	0	0	2	2	0	0	0	0	0	1	1	0	3	0	3	1	2	2	0	2	3	2	2	2	3	3	2	2	3	3	1	2	2	3	3	3	eutN; ethanolamine utilization protein EutN
K19294	1	2	1	2	2	2	0	0	0	0	0	0	0	0	0	0	0	1	1	1	1	1	0	0	1	0	0	2	2	0	0	0	0	0	0	0	0	0	0	0	0	0	0	0	algI; alginate O-acetyltransferase complex protein AlgI
K07027	1	2	2	0	2	2	3	2	1	2	2	2	2	3	2	2	1	1	1	3	3	3	3	3	2	4	2	5	4	1	1	1	2	1	2	1	4	4	3	2	2	1	1	3	K07027; glycosyltransferase 2 family protein
K22390	2	3	2	1	2	2	0	1	1	2	1	1	0	1	0	0	0	2	2	2	1	0	0	2	1	0	0	3	3	2	2	2	1	0	0	1	0	1	0	1	0	0	1	0	ACP7; acid phosphatase type 7
K03704	2	2	2	2	2	2	2	2	2	1	1	1	2	2	3	2	1	1	0	3	2	3	3	3	3	0	3	4	3	3	3	3	1	2	4	3	2	3	4	3	5	3	4	2	cspA; cold shock protein
K06891	2	2	2	2	2	2	0	1	1	0	0	0	0	0	0	0	0	0	0	0	1	0	0	0	0	1	0	0	0	2	2	2	0	1	2	2	3	2	2	2	2	2	1	2	clpS; ATP-dependent Clp protease adaptor protein ClpS
K07402	2	3	1	2	2	2	1	2	1	1	1	1	0	0	0	0	0	1	0	1	1	1	0	1	1	0	0	0	0	3	3	3	1	1	4	1	2	1	3	3	1	1	1	1	xdhC; xanthine dehydrogenase accessory factor
K07484	3	0	3	2	4	4	0	0	0	1	0	0	0	0	0	0	0	0	0	0	0	0	1	1	2	1	0	1	1	4	5	5	1	0	4	0	0	1	0	1	3	4	0	0	K07484; transposase
K07491	6	3	6	4	10	9	0	4	4	1	4	2	1	3	2	2	1	0	2	1	2	4	4	8	2	2	1	9	0	5	5	5	5	4	6	1	3	7	9	8	9	7	6	3	K07491; putative transposase
K03969	0	1	2	2	2	2	0	0	0	0	0	0	0	0	0	0	0	0	0	0	0	0	0	0	1	0	0	0	0	0	0	0	0	0	0	0	0	0	0	0	0	0	0	0	pspA; phage shock protein A
K03292	0	2	2	2	2	2	0	0	0	1	1	1	0	0	0	0	0	0	0	0	4	1	1	1	3	1	2	1	0	0	0	0	0	0	0	0	0	0	0	0	0	0	0	0	TC.GPH; glycoside/pentoside/hexuronide:cation symporter, GPH family
K03296	1	2	4	3	3	2	0	2	2	2	1	1	0	0	1	1	0	1	1	1	0	1	1	3	2	1	2	2	4	0	0	0	1	0	0	1	0	1	0	0	1	0	0	0	TC.HAE1; hydrophobic/amphiphilic exporter-1 (mainly G- bacteria), HAE1 family
K03307	1	5	5	6	6	4	1	3	5	6	3	2	1	1	1	1	1	1	0	7	8	4	10	16	8	6	3	13	12	2	2	2	0	2	2	2	0	4	4	2	2	2	3	1	TC.SSS; solute:Na+ symporter, SSS family
K03317	0	2	1	2	2	1	1	1	1	0	1	1	0	0	0	0	0	1	1	0	1	1	1	1	1	0	0	1	0	1	1	1	1	1	1	1	0	1	1	1	1	1	1	1	TC.CNT; concentrative nucleoside transporter, CNT family
K03328	3	1	2	2	2	2	0	0	0	0	0	0	0	0	0	0	0	1	0	0	1	1	3	1	3	3	0	2	1	1	1	1	0	0	1	1	2	1	1	1	0	0	0	0	TC.PST; polysaccharide transporter, PST family
K06287	2	2	2	3	2	2	1	1	1	1	1	1	0	0	2	1	1	0	0	1	1	1	1	1	2	1	1	1	1	1	1	1	1	1	1	1	1	1	1	1	1	1	1	1	maf; septum formation protein
K06330	3	1	2	2	2	2	0	0	0	0	0	0	0	0	1	1	0	0	0	0	1	0	1	0	0	0	1	0	0	0	0	0	0	0	0	0	0	0	0	0	0	0	0	0	cotH; spore coat protein H
K06381	1	3	3	3	3	3	3	3	3	4	3	3	2	2	2	2	2	1	2	3	0	2	2	2	1	1	2	2	2	1	1	1	1	2	1	1	0	1	1	1	1	0	1	1	spoIID; stage II sporulation protein D
K07340	0	2	2	2	2	1	0	1	0	0	0	0	0	0	0	0	0	1	0	0	1	1	1	0	2	1	0	1	1	0	0	0	0	0	1	1	0	1	1	1	1	1	1	1	ybbJ; inner membrane protein
K02005	10	9	6	8	7	5	3	3	3	6	6	5	1	3	2	3	2	2	3	6	4	5	7	5	5	6	3	9	6	6	6	6	1	3	7	4	1	5	3	6	6	5	6	6	ABC.CD.TX; HlyD family secretion protein
K02200	2	3	3	2	2	2	1	0	0	0	1	1	0	0	0	0	0	0	0	0	0	0	0	1	0	0	1	0	0	2	2	2	1	0	1	1	1	1	1	1	1	1	1	1	ccmH; cytochrome c-type biogenesis protein CcmH
K02039	0	2	2	2	2	2	1	0	0	0	2	1	0	1	1	1	1	0	0	0	1	1	0	0	0	0	1	1	1	1	1	1	0	0	0	0	0	0	0	0	0	0	0	0	phoU; phosphate transport system protein
K05794	3	3	3	3	3	3	0	0	0	0	0	0	0	0	0	0	0	0	0	0	0	1	0	0	0	0	0	1	1	1	1	1	0	0	0	0	0	0	0	0	0	0	0	0	terC; tellurite resistance protein TerC
K07001	4	4	4	4	4	4	3	4	4	6	5	5	1	2	2	1	2	3	2	4	6	2	4	6	6	1	1	3	3	6	6	6	1	2	2	2	0	4	3	3	3	2	0	2	K07001; NTE family protein
K07025	2	2	2	2	3	3	0	0	0	1	1	0	0	0	0	0	0	1	0	0	0	0	0	0	0	0	0	2	2	1	1	1	1	0	1	0	1	2	1	1	2	1	1	2	K07025; putative hydrolase of the HAD superfamily
K07038	2	2	2	2	2	2	1	3	3	1	0	0	0	2	1	1	1	0	1	2	1	1	1	1	2	1	1	0	1	1	1	1	1	1	2	0	2	2	3	1	2	3	1	3	K07038; inner membrane protein
K11477	3	2	2	2	2	2	0	0	0	0	0	0	0	0	0	0	0	0	0	0	0	0	0	0	0	0	0	0	0	0	0	0	0	0	0	0	0	0	0	0	0	0	0	0	glcG; glc operon protein GlcG
K06872	2	2	2	2	2	2	1	0	0	1	1	1	0	1	0	1	0	1	0	0	1	1	1	1	1	2	1	1	1	1	1	1	1	0	1	0	0	1	1	1	1	1	0	1	K06872; uncharacterized protein
K06888	2	1	2	3	2	3	0	2	1	1	0	0	0	0	0	0	0	0	0	1	0	1	0	1	0	0	1	1	1	1	1	1	3	0	2	0	0	2	2	1	1	2	1	2	K06888; uncharacterized protein
K06889	3	2	2	2	3	3	3	3	3	3	3	3	0	0	0	0	0	0	1	1	1	0	1	4	1	1	0	1	1	4	4	4	2	2	3	2	2	3	4	3	2	4	3	2	K06889; uncharacterized protein
K06929	2	2	2	2	2	2	1	0	0	1	1	1	0	0	0	0	0	1	0	0	0	0	0	0	0	0	0	0	0	1	1	1	1	1	1	1	1	1	1	1	1	1	1	1	K06929; uncharacterized protein
K06996	3	3	4	5	4	4	0	2	1	0	0	0	0	0	0	0	0	0	0	1	0	0	0	1	0	0	2	0	0	2	2	2	1	0	2	1	0	2	1	2	4	3	3	2	K06996; uncharacterized protein
K07017	2	2	4	2	2	2	0	0	1	0	0	0	0	0	0	0	0	0	0	1	1	0	0	1	0	0	0	0	0	1	1	1	0	0	0	1	0	1	1	0	0	0	0	0	K07017; uncharacterized protein
K07045	3	2	2	1	2	2	0	0	0	1	0	0	1	1	1	1	0	0	0	0	0	0	2	0	0	0	0	0	0	1	1	1	1	1	2	2	2	2	1	2	2	2	1	2	K07045; uncharacterized protein
K07052	3	4	6	6	6	5	2	2	4	3	4	4	1	1	1	1	0	2	1	6	4	5	13	6	4	4	2	7	6	8	8	8	2	2	6	7	4	8	6	3	6	5	3	4	K07052; uncharacterized protein
K07059	1	2	2	2	2	2	2	2	2	2	1	1	0	3	3	2	3	2	1	1	0	2	1	2	2	1	1	2	2	1	1	1	0	1	2	1	1	1	1	1	2	1	2	2	K07059; uncharacterized protein
K07063	3	4	2	2	0	0	0	0	1	0	0	0	0	0	0	0	0	0	0	1	0	0	1	0	0	0	0	0	0	0	0	0	0	0	0	0	0	0	1	1	3	1	0	1	K07063; uncharacterized protein
K07065	10	3	5	6	5	5	0	0	0	0	0	0	0	0	0	0	0	0	0	0	0	0	0	0	0	0	2	0	0	2	2	2	0	0	1	1	0	2	1	0	0	1	0	0	K07065; uncharacterized protein
K07075	9	4	5	9	4	3	2	5	4	0	1	1	2	0	2	3	2	0	0	1	0	0	2	3	1	0	0	0	0	3	3	3	0	0	2	0	0	0	0	1	2	2	2	2	K07075; uncharacterized protein
K07076	10	1	3	6	7	7	0	2	2	0	0	0	0	0	0	0	0	0	1	1	0	0	0	0	1	0	3	0	0	4	4	4	1	1	2	0	0	0	0	2	1	1	1	1	K07076; uncharacterized protein
K09803	6	2	6	7	8	7	0	2	4	0	0	0	0	0	0	0	0	0	0	1	2	0	1	0	0	0	2	0	1	2	2	2	0	2	1	1	0	2	0	1	1	2	1	0	K09803; uncharacterized protein
