# Supplementary material for: Phylogeny, distribution and potential metabolism of candidate bacterial phylum KSB1
Source: PeerJ. 2022 Apr 12;10:e13241. doi: 10.7717/peerj.13241 (PMC9012183; doi:10.7717/peerj.13241)
Supplement: Supplemental Information 4 [file peerj-10-13241-s004.xlsx]

## Sheet: metagenome used in Fig.2
sample_ID	Accession_number	Environment	Tips.
marine_sed_SRR10072857	SRR10072857	marine sediment
marine_sed_SRR10072858	SRR10072858
marine_sed_SRR10072859	SRR10072859
marine_sed_SRR10072860	SRR10072860
marine_sed_SRR10072861	SRR10072861
marine_sed_SRR10072863	SRR10072863
groundwater_SRR2090164	SRR2090164	groundwater
groundwater_SRR2090165	SRR2090165
groundwater_SRR2090167	SRR2090167
groundwater_SRR2090168	SRR2090168
groundwater_SRR2090170	SRR2090170
groundwater_SRR2090171	SRR2090171
groundwater_SRR2090173	SRR2090173
groundwater_SRR4388699	SRR4388699
marine_water_SRR12347138	SRR12347138	marine water
marine_water_SRR12347139	SRR12347139
marine_water_SRR12347140	SRR12347140
marine_water_SRR12347141	SRR12347141
marine_water_SRR12347143	SRR12347143
marine_water_SRR12347144	SRR12347144
marine_water_SRR12347146	SRR12347146
reactor_SRR10914230	SRR10914230	bioreactor
reactor_SRR10914231	SRR10914231
reactor_SRR10914232	SRR10914232
reactor_SRR10914233	SRR10914233
reactor_SRR10914234	SRR10914234
reactor_SRR10914235	SRR10914235
reactor_SRR10914236	SRR10914236
reactor_SRR10914238	SRR10914238
reactor_SRR10914239	SRR10914239
reactor_SRR10914240	SRR10914240
reactor_SRR10914241	SRR10914241
reactor_SRR10914242	SRR10914242
seep_SRR2133563	SRR2133563	cold seep
seep_SRR2133565	SRR2133565
seep_SRR2133566	SRR2133566
seep_SRR2133847	SRR2133847
seep_SRR2133851	SRR2133851
seep_SRR2133852	SRR2133852
seep_SRR5386564	SRR5386564
vent_sed_SRR6301444	SRR6301444	hydrothermal vent	hydrothermal vent sediment
vent_sed_SRR6301445	SRR6301445
vent_sed_SRR6301446	SRR6301446
vent_sed_SRR6301447	SRR6301447
vent_sed_SRR8439172	SRR8439172
hydr_fluid_SRR3723048	SRR3723048		hydrothermal vent fluid
hydr_fluid_SRR3732688	SRR3732688
