# Supplementary material for: Phylogeny, distribution and potential metabolism of candidate bacterial phylum KSB1
Source: PeerJ. 2022 Apr 12;10:e13241. doi: 10.7717/peerj.13241 (PMC9012183; doi:10.7717/peerj.13241)
Supplement: Supplemental Information 5 [file peerj-10-13241-s005.xlsx]

## Sheet: miTag
Ocean	North Atlantic Ocean	Mediterranean Sea	Mediterranean Sea	Mediterranean Sea	Mediterranean Sea	Mediterranean Sea	Mediterranean Sea	Red Sea	Red Sea	Red Sea	Red Sea	Indian Ocean	Indian Ocean	Indian Ocean	Indian Ocean	Indian Ocean	Indian Ocean	Indian Ocean	Indian Ocean	Indian Ocean	Indian Ocean	Indian Ocean	Indian Ocean	South Atlantic Ocean	South Atlantic Ocean	South Atlantic Ocean	South Atlantic Ocean	South Atlantic Ocean	South Atlantic Ocean	South Atlantic Ocean	South Atlantic Ocean	(SO) Southern Ocean	(SO) Southern Ocean	South Pacific Ocean	South Pacific Ocean	South Pacific Ocean	South Pacific Ocean	South Pacific Ocean	South Pacific Ocean	South Pacific Ocean	North Pacific Ocean	South Pacific Ocean	South Pacific Ocean	South Pacific Ocean	South Pacific Ocean	South Pacific Ocean	South Pacific Ocean	South Pacific Ocean	South Pacific Ocean
depth	5	5	5	5	5	5	5	5	5	5	5	5	5	5	5	5	5	5	5	5	5	5	5	5	5	5	5	5	5	5	5	5	5	5	5	5	5	5	5	5	5	5	5	5	5	5	5	5	5
sample	TARA.004.SRF.0.22-1.6	TARA.007.SRF.0.22-1.6	TARA.009.SRF.0.22-1.6	TARA.018.SRF.0.22-1.6	TARA.023.SRF.0.22-1.6	TARA.025.SRF.0.22-1.6	TARA.030.SRF.0.22-1.6	TARA.031.SRF.0.22-1.6	TARA.032.SRF.0.22-1.6	TARA.033.SRF.0.22-1.6	TARA.034.SRF.0.22-1.6	TARA.036.SRF.0.22-1.6	TARA.038.SRF.0.22-1.6	TARA.041.SRF.0.22-1.6	TARA.042.SRF.0.22-1.6	TARA.045.SRF.0.22-1.6	TARA.048.SRF.0.22-1.6	TARA.052.SRF.0.22-1.6	TARA.056.SRF.0.22-3	TARA.057.SRF.0.22-3	TARA.062.SRF.0.22-3	TARA.064.SRF.0.22-3	TARA.065.SRF.0.22-3	TARA.066.SRF.0.22-3	TARA.067.SRF.0.22-3	TARA.068.SRF.0.22-3	TARA.070.SRF.0.22-3	TARA.072.SRF.0.22-3	TARA.076.SRF.0.22-3	TARA.078.SRF.0.22-3	TARA.082.SRF.0.22-3	TARA.084.SRF.0.22-3	TARA.085.SRF.0.22-3	TARA.093.SRF.0.22-3	TARA.094.SRF.0.22-3	TARA.096.SRF.0.22-3	TARA.098.SRF.0.22-3	TARA.099.SRF.0.22-3	TARA.100.SRF.0.22-3	TARA.102.SRF.0.22-3	TARA.109.SRF.0.22-3	TARA.110.SRF.0.22-3	TARA.111.SRF.0.22-3	TARA.112.SRF.0.22-3	TARA.122.SRF.0.22-3	TARA.123.SRF.0.22-3	TARA.124.SRF.0.22-3	TARA.125.SRF.0.22-3	TARA.128.SRF.0.22-3
cladeⅠ	0.0109741	0.00263762	0.00136038	0.00448957	0.00123169	0.00150107	0	0.00321107	0	0	0	0.00159923	0	0	0.00102315	0.00160591	0.00143597	0.00276274	0.002944	0.000991159	0.00287418	0.0010701	0.00325595	0.0014207	0	0.00146726	0.00244469	0	0.00512485	0.0203858	0	0	0	0	0	0.00146201	0.0013829	0.0041638	0.000816446	0.00134613	0	0.000936935	0.0017367	0.000834028	0.0027759	0	0.00138664	0.00154877	0.00389181
cladeⅡ	0.0164611	0.00659404	0.046933	0.0157135	0.0110852	0.0270193	0.00836033	0.0264913	0.0346416	0.0115417	0.0261845	0.0463777	0.0188447	0.0434075	0.0204631	0.0273005	0.0308733	0.0230228	0.0441601	0.0455933	0.0617949	0.0374536	0.0944226	0.0625107	0.246366	0.451918	0.305586	0.106834	0.558609	0.256097	0.645598	0.289024	0.289189	0.00112166	0.00313075	0.0511703	0.0484014	0.0520476	0.0236769	0.04173	0.0473518	0.0843241	0.0824932	0.0483736	0.0693975	0.356795	0.0991444	0.0487862	0.108971
cladeⅢ	0	0	0	0	0	0	0	0	0	0	0	0	0	0	0	0	0	0	0	0	0	0	0	0	0	0	0	0	0	0	0	0	0	0	0	0	0	0	0	0	0	0	0	0	0	0	0	0	0
cladeⅣ	0.00219481	0.00263762	0.00408113	0.0216996	0.00615847	0.00600429	0.00418016	0.0152526	0.0311775	0.0144271	0.0169429	0.0223893	0.0188447	0.0108519	0.00920839	0.00562068	0.0114877	0.0128928	0.02944	0.0198232	0.031616	0.031033	0.00976785	0.032676	0.0123183	0.0161399	0.0244469	0.0127183	0.0128121	0.00764468	0.00829462	0.00148598	0.0202187	0.0123382	0.0133057	0.0138891	0.00968027	0.0229009	0.0155125	0.0323071	0.024064	0.0252972	0.0295239	0.0166806	0.0342361	0.0254854	0.0291193	0.0410423	0.0457287
[truncated: 90 more columns]

## Sheet: MAG relative abundance
genome	GCA_013361015.1	GCA_013359425.1	GCA_003576975.1	GCA_013359385.1	GCA_008363195.1	GCA_014338045.1	GCA_002011685.1	B23T1B10	B3T3L14	vent-69	GCA_002898015.1	GCA_002898095.1	GCA_002085035.1	GCA_003645965.1	GCA_003644765.1	GCA_003644775.1	GCA_003644785.1	GCA_002085355.1	GCA_002084535.1	GCA_014729735.1	GCA_003818595.1	GCA_002327255.1	GCA_014728085.1	GCA_014728115.1	GCA_003854975.1	GCA_003854995.1	GCA_001771235.1	203742	203852	GCA_011775825.1	GCA_011774205.1	GCA_011777055.1	B16T1L6	GCA_004357015.1	B13T1L6	GCA_004356135.1	GCA_004356185.1	GCA_004356825.1	B79T1L10	B11D1T2	B77T1B5	B4MC02	B24T1B10	B70T1B8
groundwater_SRR2090164	1.03e-05	4.46e-06	5.84e-05	2.59e-06	5.09e-05	4.97e-05	0.000151719	3.68e-05	4.6723e-05	1.51e-05	2.8e-05	5.42e-05	7.06e-05	0	0	0	0	0	0	0	0	0	0	4.2e-06	1.37e-06	2.59e-06	0.000736016	0	0	0	0	0	0	0	0.00015741	6.6e-05	0	5.18e-06	1.96e-05	4.83e-06	3.49e-05	0	0	9.52e-06
groundwater_SRR2090165	5.54e-06	0	3.25e-05	1.27e-06	2.7e-05	2.57e-05	8.76e-05	3.52e-05	2.8e-05	8.81e-06	2.86e-05	5.84e-05	5.74e-05	0	1.75e-06	1.89e-05	1.01e-05	4.94e-06	6.82e-06	9e-07	9.09e-07	4.02e-06	8.89e-06	0	4.82e-06	0	0.00450646	4.25e-06	1.72e-06	0	6.83e-07	7.9e-07	4.53e-06	0	0.000185039	1.7e-05	0	5.5e-06	5.6e-05	9.83e-07	4.23e-05	2.08e-06	1.28e-06	1.4e-05
groundwater_SRR2090167	0	5.7e-06	4.83e-05	0	5.31e-05	4.31e-05	0.000128905	3.72e-05	5.4e-05	1.15e-05	4.74e-05	0.000105296	6.93e-05	0	0	0	0	0	0	0	0	0	0	2.9e-06	1.45e-06	0	0.000315707	5.27e-06	0	0	0	0	0	0	0.000286345	0.000104948	0	1.2e-05	1.61e-05	7.42e-06	3.99e-05	2.46e-06	0	1.32e-05
groundwater_SRR2090168	1.24e-06	2.31e-06	3.94e-05	1.81e-06	2.32e-05	9.65e-06	0.000101622	2.13e-05	3.14e-05	1.81e-05	1.96e-05	3.92e-05	6.4e-05	3.66e-06	4.88e-06	1.99e-05	1.41e-05	1.57e-06	7.61e-06	5.93e-06	2.92e-06	5.84e-06	5.28e-06	1.51e-06	3.84e-06	2.51e-06	0.00740592	6.59e-06	0	6.57e-07	0	0	7.26e-06	0	0.00019927	2.47e-05	0	1.35e-05	3.93e-05	9.2e-07	5.01e-05	2.92e-06	3.91e-06	1.12e-05
groundwater_SRR2090170	0	8.51e-07	1.91e-05	0	1.75e-05	2.47e-05	4.41e-05	3.94e-05	3.51e-05	1.35e-05	4.51e-05	4.98e-05	9.57e-05	0	0	0	0	0	0	0	0	0	0	1.96e-06	0	0	0.000423221	0	0	0	0	0	0	0	5.04e-05	2.27e-05	0	1.1e-05	2.6e-06	1.64e-06	1.6e-05	0	0	2.01e-06
groundwater_SRR2090171	5.69e-07	3.69e-06	3.61e-05	5.74e-07	2.51e-05	1.35e-05	8.03e-05	3.81e-05	4.45e-05	1.49e-05	3.59e-05	5.27e-05	4.76e-05	1.69e-06	3.01e-06	2.58e-05	1.31e-05	2.04e-06	2.29e-05	2.28e-06	1.37e-06	8.53e-06	3.88e-06	5.82e-07	4.51e-06	0	0.00770681	4.47e-06	3.37e-06	0	6.59e-07	1.24e-06	3.93e-06	0	0.000198126	4.25e-05	0	1.53e-05	2.15e-05	0	5.07e-05	1.9e-06	1.19e-06	3.49e-05
groundwater_SRR2090173	7.96e-07	0	1.13e-05	0	1.94e-05	1.8e-05	4.64e-05	2.12e-05	1.65e-05	4.02e-06	2.02e-05	3.4e-05	5.14e-05	0	0	5.76e-06	0	0	7.03e-06	1.58e-06	0	0	0	1.06e-06	0	0	0.000103096	4.02e-06	0	0	0	0	0	0	0.000127712	8.86e-05	0	2.27e-05	0	0	2.56e-05	2.01e-06	0	7.58e-06
groundwater_SRR4388699	8.71e-07	2.26e-06	3.68e-05	0	1.72e-05	9.75e-06	3.25e-05	1.91e-05	2.15e-05	5.78e-06	3.79e-05	3.6e-05	3.44e-05	0	0	0	0	0	3.74e-06	0	0	0	0	0	0	0	8.67e-05	6.18e-06	0	0	0	0	0	0	0.000121469	7.86e-05	0	2.74e-05	6.82e-06	0	2.79e-05	0	0	1.68e-05
marine_water_SRR12347138	0	3.76e-05	7.14e-05	0.000111733	4.11e-05	0	0.000180253	0.00015508	0.000233985	0	8.78e-05	0	0.000189268	0	0	0	0	0	0	0	0	0	0	0	0	0	0	0	0	0	0	0	0	0	0.000575213	5.01e-05	0	7.42e-05	0	6.66e-05	5.6e-05	0	0	0
marine_water_SRR12347139	0	5.46e-05	0.000136318	9.99e-05	2.78e-05	2.97e-05	0.000214716	0.000147023	0.000139466	0	4.36e-05	0.000110507	0.000210211	0	0	0	0	0	4.87e-05	0	0	0	0	0	0	0	0	2.63e-05	0	0	0	0	0	6.81e-05	0.000818757	0	0	0.00011965	0	0	4.41e-05	0	0	0
marine_water_SRR12347140	1.09e-05	5.76e-05	5.02e-05	1.04e-05	1.37e-05	5.26e-05	0.000225724	8.19e-05	0.00033694	7.06e-05	0	7.67e-05	0.000222331	4.3e-05	3.65e-05	3.71e-05	0	0.000169598	7.46e-05	1.73e-05	0	0	1.37e-05	0	0	0	0	3.79e-05	0	4.01e-05	0.000118433	2.67e-05	0	3.24e-05	8.16e-05	0	0	6.41e-05	1.86e-05	0	5.85e-05	4.14e-05	3.02e-05	0
marine_water_SRR12347141	1.61e-05	5.74e-05	3e-05	7.3e-07	6.87e-05	3.71e-05	6.23e-05	0.000166902	0.000202338	0.000125686	0.000112354	4.42e-05	0.000102661	8.49e-05	4.1e-05	3.81e-05	2.38e-05	0.000226637	0.000110825	2.77e-05	1.14e-05	1.23e-05	0	1.48e-05	0	0	0	5.45e-05	0	2.04e-05	5.76e-05	1.94e-05	2.11e-05	0	5.67e-05	4.21e-05	5.07e-05	2.57e-05	2.61e-05	0	5.36e-05	0	5.7e-05	1.69e-05
marine_water_SRR12347143	3.06e-05	0	0	0	2.73e-05	3.04e-05	0.000223956	0.000148713	0.000103505	0	3.02e-05	0.000137752	8.32e-05	0	0	0.000162357	0	0.000312513	0.000146189	9.37e-05	0	3.71e-05	0	0	3.57e-05	0	6.51e-05	1.29e-05	0	0	2.86e-05	0	0	0	0.000108599	8.57e-05	0	9.1e-05	3.98e-05	0	0.000218934	0.000190308	0.000136052	3.12e-05
marine_water_SRR12347144	2.54e-05	4.97e-05	1.66e-05	1.19e-05	4.49e-05	1.74e-05	0.000176086	0.000117801	0.000140865	0	0	6.86e-05	0.000152491	9.45e-05	0	0	4.24e-05	0.000216819	5.49e-05	5.17e-05	1.58e-05	0	5.42e-05	2.32e-05	5.65e-05	1.4e-06	6.64e-05	1.45e-05	0	0	2.89e-05	1.6e-05	0	7.52e-05	5.85e-05	5.78e-05	1.39e-05	6.11e-05	6.44e-05	6.04e-05	0.000155175	0.000154011	0.000201805	3.6e-05
marine_water_SRR12347146	1.02e-05	5.67e-05	6.13e-05	0.000246908	0.000100906	2.62e-05	0.000142741	0.000215038	4.88e-05	0	2.6e-05	3.46e-05	0.000469101	0	0	0	0	0	0	0	0	0	0	0	0	0	0	0	0	0	0	0	0	0	0.000487619	3.07e-05	0	6.04e-05	0	7.32e-05	1.86e-05	2.21e-05	0	0
reactor_SRR10914230	0.0942093	3.12749	0.0241403	0.100937	0.0173911	0.0169831	3.16e-05	1.05e-05	1.48e-05	0.000122682	4.7e-06	9.79e-05	3.14e-05	0	0	6.25e-06	5.77e-06	2.74e-06	0	0	4.05e-06	9.56e-07	0	0	0.000214618	0	4.36e-06	0	3.69e-06	0	0	0	0	1.57e-06	6.41e-05	0.000147416	0	7.64e-07	2.33e-06	8.27e-07	5.44e-06	0	0	1.15e-06
reactor_SRR10914231	0.0894916	3.47715	0.0231058	0.0957622	0.0162157	0.01528	4.33e-05	8.46e-06	1.28e-05	0.000104698	1.75e-05	6.48e-05	2.93e-05	0	2.22e-06	2.38e-05	1.09e-05	2.27e-06	0	0	2.86e-06	0	0	0	0.000229234	0	1.47e-05	0	5.29e-07	0	0	0	0	0	0.000144564	0.000376683	0	0	3.32e-06	0	7.69e-06	7.07e-07	0	3.07e-06
reactor_SRR10914232	0.112285	4.4132	0.0303095	0.121596	0.0215251	0.0203522	5.85e-05	1.39e-05	1.24e-05	0.000139372	1.88e-05	6.84e-05	8.36e-05	0	1.19e-06	3.64e-05	1.1e-05	0	1.68e-06	0	2.66e-06	0	0	4.45e-07	0.000281891	0	1.82e-05	1.07e-06	1.76e-06	0	0	0	0	0	8.54e-05	0.000307275	0	2.85e-06	4.42e-06	1.68e-06	6.45e-06	1.6e-06	5.88e-06	3.14e-06
reactor_SRR10914233	0.102241	3.63739	0.0230286	0.1072	0.0158544	0.0149181	1.59e-05	7.5e-06	7.64e-06	0.00011867	6.34e-06	0.000121028	3.32e-05	0	0	1.77e-05	1.58e-05	2.4e-06	0	0	3.39e-06	0	0	0	0.000195894	0	6.01e-06	5.81e-07	6.01e-07	0	0	0	0	0	0.000126597	0.0002448	0	2.32e-06	2.19e-06	1.62e-06	7.81e-06	8.19e-07	2.99e-06	8.68e-06
reactor_SRR10914234	0.209232	15.2317	0.0417111	0.412877	0.0159351	0.0144977	0.000269868	3.36e-05	4.45e-05	4.75e-05	1.48e-05	0.000119692	0.000101226	0	0	2.84e-05	1.15e-05	0	5.04e-06	0	8.77e-07	1.11e-06	0	2.31e-05	1.19e-05	1.35e-06	1.24e-06	1.15e-05	8.55e-06	0	0	0	0	6.27e-06	0.000251636	5.91e-05	0	1.32e-05	2.01e-06	5e-06	5.53e-05	1.23e-06	4.57e-06	5.26e-05
reactor_SRR10914235	0.187113	14.1026	0.0378496	0.38025	0.014905	0.0131302	0.000289022	3.55e-05	4.7e-05	4.61e-05	7.89e-06	8.95e-05	0.00013627	0	0	3.42e-05	3.02e-05	0	0	0	2.34e-06	9.69e-07	8.75e-07	2.34e-05	1.06e-05	0	3.11e-06	1.63e-05	9.4e-06	0	0	0	0	0	0.000245233	7.78e-05	0	8.33e-06	8.72e-07	2.16e-06	5.84e-05	0	3.74e-06	3.99e-05
reactor_SRR10914236	0.201482	14.9034	0.0420629	0.409448	0.0159484	0.0147337	0.00027032	4.37e-05	4.01e-05	3.33e-05	1.83e-05	9.48e-05	0.000143103	0	1.99e-06	4.83e-05	1.82e-05	0	0	0	9.02e-07	2.24e-06	9.42e-07	3.3e-05	1.21e-05	0	3.93e-06	5.52e-06	3.76e-06	1.13e-06	1.06e-06	0	0	0	0.0001974	5.81e-05	0	4.95e-06	1.01e-06	2.53e-06	6.67e-05	2.61e-06	4.27e-06	5.56e-05
reactor_SRR10914238	0.158032	4.92731	0.026547	0.132258	0.016734	0.0156483	3.48e-05	6.43e-06	1.28e-05	6.94e-05	1.2e-05	1.51e-05	4.74e-05	0	3.84e-06	1.49e-05	1.95e-06	3.72e-06	3.07e-06	0	1.64e-06	1.45e-06	0	0	0.000373337	0	5.65e-06	2.51e-06	6.88e-06	0	0	0	0	0	8.48e-05	0.000231669	0	2.15e-06	6.29e-06	2.46e-06	4.83e-06	2.39e-06	3.98e-06	2.14e-06
reactor_SRR10914239	0.104898	2.49073	0.021212	0.0792973	0.0155427	0.0150942	1.7e-05	5.8e-07	8.88e-06	0.000111351	1.12e-05	5.4e-05	1.34e-05	0	0	7.06e-06	7.77e-06	2.56e-06	0	0	2.08e-06	0	0	0	0.000327145	0	1.64e-06	0	1.15e-06	0	0	0	0	0	2.8e-05	7.93e-05	0	4.1e-06	1.92e-06	0	2.41e-06	0	3.86e-06	0
reactor_SRR10914240	0.0766028	1.78679	0.0158104	0.0565053	0.0116258	0.0115798	2.06e-05	1.34e-05	7.33e-06	7.56e-05	2.61e-06	4.69e-05	2.29e-05	0	0	1.32e-05	5.59e-06	1.16e-06	0	0	5.1e-07	0	0	0	0.000152772	0	1.57e-06	1e-06	0	0	0	0	0	0	3.16e-05	0.000107141	0	2.71e-06	1.92e-06	7.92e-07	2.74e-06	0	8.66e-07	1.85e-06
reactor_SRR10914241	0.078607	2.90106	0.0190159	0.0742493	0.0141406	0.0140081	9.65e-06	1e-05	1.5e-05	6.86e-05	1.03e-05	3.52e-05	3.45e-05	0	1.32e-06	1.65e-05	1.84e-05	0	0	0	6.01e-07	0	0	0	0.000224913	0	1.85e-06	0	2.02e-06	0	0	0	0	0	6.46e-05	0.000103027	1.18e-06	2.6e-06	3.39e-06	0	3.85e-06	8.64e-07	1.14e-06	2.41e-06
reactor_SRR10914242	0.126227	4.73343	0.0310463	0.136566	0.0225114	0.0213739	3.09e-05	8.23e-06	5.83e-06	0.000133644	1.3e-05	7.24e-05	3.73e-05	0	0	9.52e-06	1.18e-05	2.88e-06	0	0	2.36e-06	0	0	1.46e-06	0.000281253	0	1.64e-05	2.33e-06	6.47e-07	0	0	0	0	0	5.64e-05	0.000243282	0	0	4.09e-06	2.72e-06	5.1e-06	3.66e-06	4.18e-06	0
seep_SRR2133563	4.79e-06	8.52e-06	3.52e-05	6.08e-06	4.14e-05	3.48e-05	0.000291843	6.83e-05	0.000125262	2.39e-05	4.22e-05	9.35e-05	0.000203046	1.04e-06	0.000382591	2.88e-05	0	1.6e-05	3.47e-05	6.36e-06	3.28e-06	7.83e-07	7.81e-06	7.56e-06	6.44e-06	0	1.23e-05	2.07e-06	6.37e-07	1.26e-06	5.62e-07	1.13e-06	0	7.45e-06	0.000269143	1.92e-05	8.7e-06	4.03e-05	8.26e-05	1.09e-05	0.000149657	8.56e-06	7.8e-06	3.59e-05
seep_SRR2133565	6.87e-06	1.11e-05	4.48e-05	4.6e-06	4.55e-05	2.62e-05	0.000288533	7.65e-05	0.000121937	2.39e-05	6e-05	9.55e-05	0.000207635	1.67e-06	0.000379759	2.71e-05	0	1.05e-05	3.74e-05	3.9e-06	3.07e-06	2.16e-06	1.66e-05	7.69e-06	8.56e-06	0	1.19e-05	3.34e-06	2.67e-06	2.82e-06	1.52e-06	1.7e-06	1.18e-06	1.92e-05	0.000291365	1.87e-05	5.62e-06	3.68e-05	0.000110826	2.16e-05	0.000148941	1.13e-05	5.28e-06	3.75e-05
seep_SRR2133566	9.44e-06	1.4e-05	4.2e-05	4.72e-06	3.59e-05	3.27e-05	0.00013293	7.63e-05	0.000131382	5.18e-05	4.45e-05	0.000132292	0.000138289	2.21e-06	0.000227998	3.77e-05	1.6e-06	1.75e-05	4.55e-05	1.26e-05	6.96e-06	0	9.81e-06	7.04e-06	1.6e-05	3.95e-06	1.54e-05	2.15e-06	0	1.98e-06	1.7e-06	3.31e-06	6.8e-06	2.5e-05	0.000289653	1.3e-05	1.16e-05	2.99e-05	0.000111888	7.88e-06	0.000114262	7.92e-06	3.46e-06	5.5e-05
seep_SRR2133847	7.55e-06	9.65e-06	3.55e-05	1.17e-05	4.15e-05	1.84e-05	8.46e-05	7.26e-05	0.000112447	2.42e-05	4.18e-05	8.33e-05	0.000198645	2.01e-06	0.001213	5.04e-05	1.07e-06	6.02e-06	1.46e-05	7.64e-07	2.55e-06	0	2.1e-06	6.51e-06	5.19e-06	4.03e-08	5.11e-06	5.16e-07	0	1.58e-06	0	3.79e-07	1.64e-06	1.52e-05	0.00026229	1.93e-05	8.56e-07	4.53e-05	0.000103208	6.3e-06	0.000116651	1.63e-05	2.37e-06	7.54e-05
seep_SRR2133851	1.11e-05	8.81e-06	2.89e-05	4.37e-06	2.85e-05	1.96e-05	0.000142961	7.6e-05	0.000118488	5.21e-06	4.64e-05	5.22e-05	0.000301198	7.06e-06	0.000387058	3.74e-05	0	1.16e-05	5.4e-05	1.21e-05	3.46e-06	0	6.7e-07	1.6e-05	6.68e-06	9.46e-07	4.34e-06	2.05e-06	7.61e-07	1.22e-06	1.13e-06	1.28e-06	1.16e-06	1.51e-05	0.000180302	7.64e-06	5.49e-06	4.3e-05	6.94e-05	2.6e-06	9.76e-05	8.01e-06	3.21e-06	3.21e-05
seep_SRR2133852	1.14e-05	9.63e-06	4.13e-05	6.62e-06	3.6e-05	2.33e-05	0.000110935	7.32e-05	0.000138691	2.17e-05	3.4e-05	0.000110549	0.000200522	6.18e-06	0.000302788	3.14e-05	1.11e-06	2.08e-05	6.93e-05	9.92e-06	2.05e-06	0	4.94e-06	9.58e-06	1.35e-05	8.18e-08	1.81e-05	1.82e-06	0	1.2e-06	1.97e-06	7.7e-07	1e-06	2.35e-05	0.000253001	7.96e-06	6.98e-06	3.86e-05	6.05e-05	7.35e-06	0.000125391	1.66e-05	1.24e-05	2.48e-05
seep_SRR5386564	1.2e-05	9.59e-06	2.75e-05	3.36e-06	2.46e-05	2.2e-05	0.000120971	6.77e-05	0.000120916	1.03e-05	3.95e-05	6.14e-05	0.000199871	4.52e-06	0.000338271	3.69e-05	8.89e-07	1.79e-05	6.61e-05	1.09e-05	4.16e-06	3.26e-07	4.21e-06	1.25e-05	8.05e-06	1.35e-06	6.48e-06	1.93e-06	4.25e-07	1.27e-06	1.03e-06	9.04e-07	2.26e-07	8.18e-06	0.000151017	9.28e-06	2.76e-06	4.23e-05	6.77e-05	5.3e-06	0.000119666	6.52e-06	8.67e-06	3.18e-05
vent_sed_SRR6301444	1.22e-07	1.59e-06	7.13e-06	1.58e-06	8.12e-06	6.33e-06	0.000117009	3.83e-05	0.000126691	1.4e-05	1.81e-05	3.13e-05	0.0157845	0.0185762	0.0194388	0.0161385	0.0135186	0.0337611	0.0148454	5.08e-06	3.19e-06	2.66e-07	4.02e-06	2.28e-06	7.52e-06	3.78e-06	3.23e-06	1.48e-06	6.01e-07	2.78e-07	3.36e-07	2.1e-07	4.66e-07	1.67e-05	8.21e-05	8.48e-06	1.81e-06	2.23e-05	1.86e-05	5.69e-07	4.25e-05	1.6e-06	1.16e-06	1.05e-05
vent_sed_SRR6301445	4.44e-07	1.7e-06	8.7e-06	1.86e-06	7.33e-06	6.6e-06	0.000112231	5.17e-05	8.75e-05	1.13e-05	1.76e-05	2.81e-05	0.0181676	0.0224221	0.0231369	0.0179624	0.0154649	0.0283874	0.0114217	3.65e-06	2.03e-06	4.12e-08	4.44e-06	1.86e-06	4.82e-06	3.16e-06	2.05e-06	4.79e-07	4.96e-07	4.66e-07	4.81e-07	4.11e-07	1.08e-06	2.11e-05	7.65e-05	4.91e-06	1.11e-06	2.33e-05	1.7e-05	5.7e-07	3.44e-05	2.53e-06	2.6e-06	8.98e-06
vent_sed_SRR6301446	2.17e-07	5.01e-07	7.7e-06	9.07e-07	1.32e-05	6.53e-06	8.46e-05	4.13e-05	7.19e-05	4.06e-05	2.6e-05	9.96e-05	0.00133812	0.00114245	0.00137302	0.00118304	0.00109894	0.00395073	0.0215951	6.41e-07	3.62e-06	1.77e-07	1.85e-06	3.37e-07	2.15e-06	1.54e-06	1.47e-05	6.33e-06	0	1.96e-07	1.92e-07	2.32e-07	1.39e-06	9.21e-05	0.000134215	2.44e-05	1.04e-07	0.000104345	8.78e-05	1.47e-05	5.78e-05	6.56e-06	1.32e-05	1.53e-05
vent_sed_SRR6301447	6.84e-07	1.88e-06	1.4e-05	2.73e-06	1.46e-05	1.08e-05	9.57e-05	8.72e-05	0.000133045	3.94e-05	5.11e-05	0.000123882	0.00240616	0.00160442	0.00165816	0.00185678	0.00154015	0.00787364	0.0521655	3.56e-06	3.67e-06	9.23e-08	4.06e-06	2.27e-06	6.78e-06	2.82e-06	2.89e-05	6.53e-06	6.19e-07	6.03e-07	4.12e-07	5.04e-07	6.06e-06	2.29e-05	0.00022557	1.71e-05	3.13e-06	0.00026539	0.000209479	4.06e-06	9.59e-05	6.26e-06	8.41e-06	2.26e-05
vent_sed_SRR8439172	6.38e-07	2.01e-06	4.94e-05	2.36e-06	3.07e-05	3.08e-05	0.000319513	5.25e-05	0.000138276	0.171775	4.24e-05	0.000101941	0.000194666	1.08e-05	3.38e-05	3.93e-05	1.27e-06	9.31e-06	1.37e-06	4.87e-06	2.42e-06	6.45e-07	1.34e-06	1.08e-06	1.31e-06	3.9e-07	1.45e-05	6.65e-06	0	2.37e-06	8.78e-07	2.4e-06	5.68e-06	4.42e-05	0.00014899	0.000441129	6.96e-07	1.88e-05	0.000802662	2.81e-07	7.26e-05	4.39e-06	9.48e-06	5.33e-06
hydr_fluid_SRR3723048	0	2.32e-07	7.71e-06	1.14e-07	9.44e-06	7.39e-06	0.0436545	1.51e-05	1.79e-05	0.000278436	4.83e-05	0.000363648	0.000436182	3.52e-05	3.7e-05	3.22e-05	5.73e-06	1.14e-06	0	2.05e-07	0	1.74e-06	0	0	1.06e-07	0	0	7.34e-07	8.59e-08	0	5.63e-08	5.87e-08	2.7e-07	0	3.69e-05	1.19e-05	1.71e-07	1.42e-05	1.1e-06	2.56e-06	1.46e-05	4.39e-07	2.54e-06	4.35e-06
hydr_fluid_SRR3732688	0	8.06e-07	7.77e-06	3.75e-07	8.28e-06	1.18e-05	0.337557	2.19e-05	3.08e-05	0.000348202	7.24e-05	0.000453919	0.000256955	1.38e-05	1.82e-05	1.43e-05	4.79e-06	4.66e-07	3.26e-07	0	7.37e-07	7.05e-06	0	0	0	0	1.7e-07	1.36e-05	5.24e-07	1.66e-07	5.46e-07	0	0	1.75e-05	0.000102687	2.76e-05	0	1.21e-06	2.16e-06	2.54e-05	9.77e-06	3.49e-07	2.4e-05	2.65e-06
marine_sed_SRR10072863sorted Relative Abundance (%)	7.06e-06	1.65e-05	2.31e-05	6.98e-06	3.75e-05	2.61e-05	0.000333536	0.000119338	0.000167682	0.000117313	8.91e-05	0.000138924	0.000249044	1.63e-05	3.41e-05	3.53e-05	9.39e-06	0.000102253	5.18e-05	9.61e-05	9.86e-06	1.01e-05	4.11e-05	3.29e-05	5.56e-05	8.1e-06	4.98e-05	1.59e-05	5.86e-06	1.19e-05	2.3e-05	3.1e-05	1.08e-05	1.05e-05	0.000113796	4.34e-05	1.75e-05	7.88e-05	9.4e-05	3.65e-05	9.94e-05	4.59e-05	5.41e-05	3.95e-05
marine_sed_SRR10072861sorted Relative Abundance (%)	1.12e-05	3.89e-05	5.64e-05	2.41e-05	5.11e-05	4.1e-05	0.000462643	0.00010687	0.000174115	0.000168779	8.62e-05	9.57e-05	0.000159862	2.46e-05	3.14e-05	1.82e-05	3.72e-06	0.000162154	6.2e-05	3.79e-05	3.54e-05	1.03e-05	9.75e-05	3.5e-05	0.00010694	2.99e-05	5.7e-05	6.05e-05	8.65e-06	9.56e-06	3.06e-05	3.44e-05	7.66e-06	6.56e-05	0.000179283	0.0002083	3.75e-05	4.31e-05	0.000109989	1.07e-05	9.51e-05	5.03e-05	6.14e-05	4.76e-05
marine_sed_SRR10072857sorted Relative Abundance (%)	4.61e-06	2.35e-05	4.58e-05	9.32e-06	5e-05	4.2e-05	0.000345264	0.000133987	0.000179866	0.000135001	6.47e-05	0.000112374	0.000191639	1.17e-05	5.42e-05	6.39e-05	4.59e-06	0.000147455	8.02e-05	9.59e-05	3.77e-05	1.91e-05	5.96e-05	3.86e-05	9.87e-05	1.53e-05	4e-05	7.19e-05	1.45e-05	9.86e-06	1.06e-05	1.04e-05	4.11e-06	7.63e-06	0.000136047	9.23e-05	1.3e-05	7.34e-05	5.01e-05	3.89e-05	9.38e-05	5.43e-05	6.55e-05	0.000106033
marine_sed_SRR10072858sorted Relative Abundance (%)	4.21e-06	2.67e-05	4.66e-05	4.57e-06	4.91e-05	4.16e-05	0.00047834	0.000116113	0.000157276	0.000198003	6.52e-05	0.000136159	0.000193365	2.43e-05	5.71e-05	2.15e-05	6.26e-06	0.00012492	0.000131983	8.09e-05	2.99e-05	8.86e-06	6.87e-05	3.39e-05	8.97e-05	2.21e-05	3.71e-05	7.07e-05	1.3e-05	1.26e-05	1.03e-05	6.98e-06	1.13e-05	1.95e-05	0.000155201	7.95e-05	5.09e-05	0.000102122	6.49e-05	3.21e-05	0.000118178	6.29e-05	5.13e-05	9.26e-05
marine_sed_SRR10072859sorted Relative Abundance (%)	6.51e-06	2.07e-05	5.05e-05	9.21e-06	5.18e-05	6.09e-05	0.000433644	0.000120041	0.000143539	0.000173477	6.52e-05	0.000167149	0.000235859	1.82e-05	5.44e-05	5.09e-05	7.76e-06	0.000139538	0.000110978	8.26e-05	3e-05	1.71e-05	8.25e-05	4.44e-05	0.000106565	1.27e-05	4.17e-05	7.66e-05	1.74e-05	9.26e-06	5.96e-06	1.01e-05	8.15e-06	3.11e-05	0.000149675	7.24e-05	5.23e-05	0.000110865	8.21e-05	2.41e-05	0.000130351	5.69e-05	6.27e-05	6.81e-05
marine_sed_SRR10072860sorted Relative Abundance (%)	8.27e-06	3.55e-05	5.98e-05	2.15e-05	5.96e-05	5.08e-05	0.000505152	0.00011826	0.000160051	0.000194675	8.22e-05	9.73e-05	0.000137771	5.22e-06	2.98e-05	2.74e-05	4.34e-06	0.00016181	6.47e-05	4.42e-05	2.58e-05	1.03e-05	9.81e-05	3.74e-05	8.82e-05	4.14e-05	3.88e-05	4.56e-05	1.24e-05	9.68e-06	2.45e-05	3.34e-05	1.07e-05	4.95e-05	0.000181629	0.00023752	4.11e-05	5.1e-05	0.000102432	2.21e-05	0.000111726	4.79e-05	5.15e-05	4.32e-05
