# Supplementary material for: Phylogeny, distribution and potential metabolism of candidate bacterial phylum KSB1
Source: PeerJ. 2022 Apr 12;10:e13241. doi: 10.7717/peerj.13241 (PMC9012183; doi:10.7717/peerj.13241)
Supplement: Supplemental Information 6 [file peerj-10-13241-s006.xls]

## Sheet: presence count of each MAG
MAG_id	CAZYmes	presence_count
GCA_004356185.1	AA2	4
203742	AA2	2
203852	AA2	2
GCA_003576975.1	AA2	2
GCA_003854975.1	AA2	2
GCA_008363195.1	AA2	2
GCA_013359425.1	AA2	2
GCA_014338045.1	AA2	2
GCA_014728085.1	AA2	2
GCA_014728115.1	AA2	2
GCA_002327255.1	AA2	1
GCA_013359385.1	AA2	1
GCA_011774205.1	AA3	4
GCA_011775825.1	AA3	4
GCA_011777055.1	AA3	4
B79T1L10	AA3	4
GCA_003576975.1	AA3	3
GCA_004356825.1	AA3	3
GCA_008363195.1	AA3	3
GCA_014338045.1	AA3	3
B77T1B5	AA3	3
203742	AA3	2
203852	AA3	2
GCA_004356185.1	AA3	2
GCA_013359385.1	AA3	2
GCA_013359425.1	AA3	2
GCA_014728085.1	AA3	2
B23T1B10	AA3	2
B3T3L14	AA3	2
GCA_002011685.1	AA3	1
GCA_002084535.1	AA3	1
GCA_002085355.1	AA3	1
GCA_002327255.1	AA3	1
GCA_002898015.1	AA3	1
GCA_002898095.1	AA3	1
GCA_003818595.1	AA3	1
GCA_003854975.1	AA3	1
GCA_003854995.1	AA3	1
GCA_014728115.1	AA3	1
B11D1T2	AA3	1
B13T1L6	AA3	1
B24T1B10	AA3	1
B4MC02	AA3	1
B70T1B8	AA3	1
vent-69	AA3	1
GCA_002084535.1	AA4	2
GCA_004356825.1	AA4	2
GCA_014729735.1	AA4	2
B79T1L10	AA4	2
GCA_002085355.1	AA4	1
GCA_004356135.1	AA4	1
GCA_011774205.1	AA4	1
GCA_011775825.1	AA4	1
GCA_011777055.1	AA4	1
B4MC02	AA4	1
B70T1B8	AA4	1
B77T1B5	AA4	1
B13T1L6	AA5	1
B24T1B10	AA5	1
B4MC02	AA5	1
GCA_003854975.1	AA6	6
GCA_003854995.1	AA6	4
GCA_014728115.1	AA6	4
GCA_003818595.1	AA6	3
GCA_013359425.1	AA6	3
203852	AA6	2
GCA_001771235.1	AA6	2
GCA_002327255.1	AA6	2
GCA_003576975.1	AA6	2
GCA_003644775.1	AA6	2
GCA_008363195.1	AA6	2
GCA_011774205.1	AA6	2
GCA_011775825.1	AA6	2
GCA_011777055.1	AA6	2
GCA_013359385.1	AA6	2
GCA_014338045.1	AA6	2
203742	AA6	1
GCA_003644765.1	AA6	1
GCA_003644785.1	AA6	1
GCA_013361015.1	AA6	1
GCA_014728085.1	AA6	1
GCA_014729735.1	AA6	1
B16T1L6	AA6	1
B23T1B10	AA6	1
B3T3L14	AA6	1
B77T1B5	AA6	1
GCA_011774205.1	AA7	3
GCA_011775825.1	AA7	3
GCA_011777055.1	AA7	3
GCA_002898015.1	AA7	1
GCA_002898095.1	AA7	1
GCA_013359425.1	AA7	1
GCA_014728085.1	AA7	1
B23T1B10	AA7	1
B3T3L14	AA7	1
GCA_003576975.1	AA9	1
GCA_008363195.1	AA9	1
GCA_014338045.1	AA9	1
GCA_002898015.1	CBM11	2
GCA_002898095.1	CBM11	2
GCA_003854975.1	CBM11	1
GCA_013359385.1	CBM11	1
GCA_014728115.1	CBM11	1
GCA_002085355.1	CBM16	5
GCA_003818595.1	CBM16	4
GCA_008363195.1	CBM16	3
GCA_014338045.1	CBM16	3
GCA_014728085.1	CBM16	3
GCA_003576975.1	CBM16	2
GCA_003854995.1	CBM16	2
GCA_013359385.1	CBM16	2
GCA_013359425.1	CBM16	2
GCA_013361015.1	CBM16	2
GCA_014728115.1	CBM16	2
vent-69	CBM16	2
203742	CBM16	1
GCA_002011685.1	CBM16	1
GCA_002085035.1	CBM16	1
GCA_002327255.1	CBM16	1
GCA_003644765.1	CBM16	1
GCA_003644775.1	CBM16	1
GCA_003644785.1	CBM16	1
GCA_003645965.1	CBM16	1
GCA_011774205.1	CBM16	1
GCA_011775825.1	CBM16	1
GCA_011777055.1	CBM16	1
GCA_014729735.1	CBM16	1
B13T1L6	CBM16	1
B4MC02	CBM16	1
B77T1B5	CBM16	1
GCA_014728085.1	CBM2	1
GCA_013361015.1	CBM20	7
GCA_013359385.1	CBM20	6
GCA_002898015.1	CBM20	5
GCA_002898095.1	CBM20	5
GCA_008363195.1	CBM20	5
GCA_014338045.1	CBM20	5
GCA_003576975.1	CBM20	4
GCA_013359425.1	CBM20	4
GCA_014729735.1	CBM20	4
GCA_002011685.1	CBM20	3
GCA_002085355.1	CBM20	3
GCA_003818595.1	CBM20	3
GCA_011774205.1	CBM20	3
GCA_011777055.1	CBM20	3
GCA_003644765.1	CBM20	2
GCA_003644775.1	CBM20	2
GCA_003854975.1	CBM20	2
GCA_011775825.1	CBM20	2
203742	CBM20	1
GCA_002327255.1	CBM20	1
GCA_003645965.1	CBM20	1
GCA_014728085.1	CBM20	1
GCA_014728115.1	CBM20	1
vent-69	CBM20	1
GCA_003818595.1	CBM22	3
GCA_013359425.1	CBM22	3
GCA_002327255.1	CBM22	2
GCA_002898095.1	CBM22	1
GCA_003854975.1	CBM22	1
GCA_014728115.1	CBM22	1
B23T1B10	CBM22	1
GCA_003818595.1	CBM23	2
GCA_013359385.1	CBM23	2
203742	CBM23	1
GCA_002327255.1	CBM23	1
GCA_002898015.1	CBM23	1
GCA_002898095.1	CBM23	1
GCA_008363195.1	CBM23	1
GCA_011774205.1	CBM23	1
GCA_011775825.1	CBM23	1
GCA_011777055.1	CBM23	1
GCA_013361015.1	CBM23	1
GCA_014728115.1	CBM23	1
B77T1B5	CBM23	1
GCA_013359425.1	CBM27	1
GCA_003576975.1	CBM30	2
GCA_003818595.1	CBM30	2
GCA_003854975.1	CBM30	2
GCA_008363195.1	CBM30	2
GCA_013359385.1	CBM30	2
GCA_013359425.1	CBM30	2
GCA_014338045.1	CBM30	2
GCA_014728115.1	CBM30	2
GCA_001771235.1	CBM30	1
GCA_002327255.1	CBM30	1
GCA_003644765.1	CBM30	1
GCA_003644775.1	CBM30	1
GCA_003854995.1	CBM30	1
GCA_014728085.1	CBM30	1
GCA_014729735.1	CBM30	1
GCA_003854975.1	CBM31	1
B23T1B10	CBM31	1
GCA_003854975.1	CBM32	15
GCA_003818595.1	CBM32	14
GCA_013359425.1	CBM32	12
GCA_002327255.1	CBM32	7
GCA_013361015.1	CBM32	7
GCA_003576975.1	CBM32	5
GCA_008363195.1	CBM32	5
GCA_014338045.1	CBM32	5
GCA_001771235.1	CBM32	4
GCA_003854995.1	CBM32	4
GCA_013359385.1	CBM32	4
GCA_014729735.1	CBM32	4
203742	CBM32	3
203852	CBM32	3
GCA_003644775.1	CBM32	3
GCA_003645965.1	CBM32	3
GCA_014728115.1	CBM32	3
GCA_002085355.1	CBM32	2
GCA_003644785.1	CBM32	2
GCA_004356825.1	CBM32	2
GCA_014728085.1	CBM32	2
B23T1B10	CBM32	2
B77T1B5	CBM32	2
vent-69	CBM32	2
GCA_002011685.1	CBM32	1
GCA_003644765.1	CBM32	1
GCA_004357015.1	CBM32	1
GCA_011774205.1	CBM32	1
GCA_011775825.1	CBM32	1
GCA_011777055.1	CBM32	1
B11D1T2	CBM32	1
B13T1L6	CBM32	1
B24T1B10	CBM32	1
B3T3L14	CBM32	1
B4MC02	CBM32	1
GCA_003576975.1	CBM34	1
GCA_003644775.1	CBM34	1
GCA_003854975.1	CBM34	1
GCA_011774205.1	CBM34	1
GCA_011775825.1	CBM34	1
GCA_011777055.1	CBM34	1
GCA_002327255.1	CBM35	6
GCA_003854975.1	CBM35	5
GCA_003854995.1	CBM35	5
GCA_014728115.1	CBM35	5
GCA_013359425.1	CBM35	4
GCA_014338045.1	CBM35	4
GCA_001771235.1	CBM35	3
GCA_003576975.1	CBM35	3
GCA_014729735.1	CBM35	3
203742	CBM35	2
203852	CBM35	2
GCA_002898015.1	CBM35	2
GCA_002898095.1	CBM35	2
GCA_003818595.1	CBM35	2
GCA_008363195.1	CBM35	2
GCA_013359385.1	CBM35	2
GCA_002084535.1	CBM35	1
GCA_002085355.1	CBM35	1
GCA_003644775.1	CBM35	1
GCA_003645965.1	CBM35	1
GCA_013361015.1	CBM35	1
GCA_014728085.1	CBM35	1
B24T1B10	CBM35	1
vent-69	CBM35	1
GCA_011775825.1	CBM36	1
GCA_014729735.1	CBM37	2
203852	CBM37	1
GCA_002011685.1	CBM37	1
GCA_002085355.1	CBM37	1
GCA_002327255.1	CBM37	1
GCA_003576975.1	CBM37	1
GCA_003644765.1	CBM37	1
GCA_003644785.1	CBM37	1
GCA_003818595.1	CBM37	1
GCA_008363195.1	CBM37	1
GCA_011774205.1	CBM37	1
GCA_011775825.1	CBM37	1
GCA_011777055.1	CBM37	1
GCA_013359425.1	CBM37	1
GCA_014338045.1	CBM37	1
GCA_014728085.1	CBM37	1
GCA_014728115.1	CBM37	1
B16T1L6	CBM37	1
B23T1B10	CBM37	1
vent-69	CBM37	1
GCA_003818595.1	CBM4	14
GCA_003854975.1	CBM4	10
GCA_001771235.1	CBM4	3
GCA_003854995.1	CBM4	3
GCA_014728085.1	CBM4	2
203852	CBM4	1
GCA_002327255.1	CBM4	1
GCA_002898015.1	CBM4	1
GCA_004356825.1	CBM4	1
GCA_013361015.1	CBM4	1
GCA_003854975.1	CBM40	8
GCA_003576975.1	CBM40	5
GCA_003818595.1	CBM40	5
B23T1B10	CBM40	5
GCA_003854995.1	CBM40	4
GCA_014728115.1	CBM40	4
GCA_014729735.1	CBM40	3
GCA_001771235.1	CBM40	2
GCA_008363195.1	CBM40	2
GCA_013359385.1	CBM40	2
GCA_013361015.1	CBM40	2
GCA_014728085.1	CBM40	2
B3T3L14	CBM40	2
203742	CBM40	1
203852	CBM40	1
GCA_002327255.1	CBM40	1
GCA_004356185.1	CBM40	1
GCA_013359425.1	CBM40	1
GCA_014338045.1	CBM40	1
vent-69	CBM40	1
GCA_014728085.1	CBM41	1
GCA_008363195.1	CBM44	31
GCA_013359425.1	CBM44	31
GCA_014338045.1	CBM44	31
GCA_003576975.1	CBM44	29
GCA_003818595.1	CBM44	20
GCA_013361015.1	CBM44	19
GCA_014728085.1	CBM44	11
GCA_014728115.1	CBM44	10
GCA_014729735.1	CBM44	9
203852	CBM44	8
203742	CBM44	7
GCA_013359385.1	CBM44	7
GCA_002327255.1	CBM44	3
GCA_003644775.1	CBM44	3
GCA_003854975.1	CBM44	3
GCA_002085355.1	CBM44	2
GCA_003644765.1	CBM44	2
GCA_011774205.1	CBM44	2
GCA_011775825.1	CBM44	2
GCA_011777055.1	CBM44	2
B79T1L10	CBM44	2
GCA_002084535.1	CBM44	1
GCA_003854995.1	CBM44	1
GCA_004356135.1	CBM44	1
GCA_004356825.1	CBM44	1
B23T1B10	CBM44	1
GCA_002898015.1	CBM45	2
GCA_002898095.1	CBM45	2
vent-69	CBM45	2
GCA_001771235.1	CBM45	1
GCA_003576975.1	CBM46	1
GCA_008363195.1	CBM46	1
GCA_001771235.1	CBM47	1
GCA_003854975.1	CBM48	8
GCA_003818595.1	CBM48	7
203742	CBM48	6
GCA_013359425.1	CBM48	6
203852	CBM48	5
GCA_002327255.1	CBM48	5
GCA_003576975.1	CBM48	5
GCA_008363195.1	CBM48	5
GCA_013359385.1	CBM48	5
GCA_013361015.1	CBM48	5
GCA_014338045.1	CBM48	5
GCA_014729735.1	CBM48	5
GCA_002084535.1	CBM48	4
GCA_002898015.1	CBM48	4
GCA_002898095.1	CBM48	4
GCA_003854995.1	CBM48	4
GCA_011774205.1	CBM48	3
GCA_011777055.1	CBM48	3
vent-69	CBM48	3
GCA_001771235.1	CBM48	2
GCA_011775825.1	CBM48	2
GCA_014728085.1	CBM48	2
GCA_014728115.1	CBM48	2
GCA_003644765.1	CBM48	1
GCA_003644775.1	CBM48	1
GCA_003644785.1	CBM48	1
GCA_003645965.1	CBM48	1
GCA_004357015.1	CBM48	1
B13T1L6	CBM48	1
B16T1L6	CBM48	1
B24T1B10	CBM48	1
B4MC02	CBM48	1
B77T1B5	CBM48	1
B79T1L10	CBM48	1
GCA_003854975.1	CBM5	2
B77T1B5	CBM50	15
B13T1L6	CBM50	14
B11D1T2	CBM50	13
B4MC02	CBM50	13
GCA_013359425.1	CBM50	11
B79T1L10	CBM50	11
GCA_008363195.1	CBM50	10
GCA_003576975.1	CBM50	9
GCA_004356185.1	CBM50	9
GCA_004356825.1	CBM50	9
GCA_014338045.1	CBM50	9
GCA_013359385.1	CBM50	8
GCA_014729735.1	CBM50	8
B16T1L6	CBM50	8
B24T1B10	CBM50	8
B70T1B8	CBM50	8
GCA_002327255.1	CBM50	7
GCA_014728085.1	CBM50	7
203742	CBM50	6
203852	CBM50	6
GCA_002085355.1	CBM50	6
GCA_013361015.1	CBM50	6
GCA_014728115.1	CBM50	6
vent-69	CBM50	6
GCA_002898015.1	CBM50	5
GCA_002898095.1	CBM50	5
GCA_003644775.1	CBM50	5
GCA_004356135.1	CBM50	5
GCA_002011685.1	CBM50	4
GCA_002084535.1	CBM50	4
GCA_002085035.1	CBM50	4
GCA_003644765.1	CBM50	4
GCA_003645965.1	CBM50	4
GCA_011774205.1	CBM50	4
GCA_011775825.1	CBM50	4
GCA_011777055.1	CBM50	4
B23T1B10	CBM50	4
B3T3L14	CBM50	4
GCA_003818595.1	CBM50	3
GCA_003854995.1	CBM50	3
GCA_004357015.1	CBM50	3
GCA_001771235.1	CBM50	2
GCA_003644785.1	CBM50	2
GCA_003854975.1	CBM50	2
GCA_003644765.1	CBM51	4
GCA_003644775.1	CBM51	4
GCA_003644785.1	CBM51	4
GCA_002085035.1	CBM51	3
GCA_003645965.1	CBM51	3
GCA_003854995.1	CBM51	2
GCA_002085355.1	CBM51	1
GCA_002327255.1	CBM51	1
GCA_014729735.1	CBM51	1
203852	CBM56	7
203742	CBM56	5
GCA_002327255.1	CBM56	4
GCA_003854975.1	CBM56	3
GCA_014729735.1	CBM56	3
GCA_001771235.1	CBM56	2
GCA_013359425.1	CBM56	2
GCA_013361015.1	CBM56	2
GCA_002011685.1	CBM56	1
GCA_008363195.1	CBM56	1
GCA_013359385.1	CBM56	1
GCA_014338045.1	CBM56	1
GCA_014728085.1	CBM56	1
B23T1B10	CBM56	1
B3T3L14	CBM56	1
B79T1L10	CBM56	1
GCA_014729735.1	CBM57	13
GCA_002898015.1	CBM57	7
GCA_002085355.1	CBM57	5
GCA_013361015.1	CBM57	5
vent-69	CBM57	5
GCA_013359425.1	CBM57	3
GCA_002898095.1	CBM57	2
GCA_003644775.1	CBM57	2
GCA_003644785.1	CBM57	2
203742	CBM57	1
203852	CBM57	1
GCA_002327255.1	CBM57	1
GCA_003576975.1	CBM57	1
GCA_003644765.1	CBM57	1
GCA_003645965.1	CBM57	1
GCA_003818595.1	CBM57	1
GCA_003854975.1	CBM57	1
GCA_003854995.1	CBM57	1
GCA_008363195.1	CBM57	1
GCA_014338045.1	CBM57	1
GCA_014728115.1	CBM57	1
GCA_003644775.1	CBM59	1
GCA_003818595.1	CBM6	11
GCA_003854975.1	CBM6	6
GCA_001771235.1	CBM6	2
GCA_002327255.1	CBM6	2
GCA_003854995.1	CBM6	2
GCA_013359385.1	CBM6	2
GCA_014728115.1	CBM6	2
203742	CBM6	1
203852	CBM6	1
GCA_002011685.1	CBM6	1
GCA_002898015.1	CBM6	1
GCA_003576975.1	CBM6	1
GCA_008363195.1	CBM6	1
GCA_013359425.1	CBM6	1
GCA_014338045.1	CBM6	1
GCA_002085035.1	CBM61	1
GCA_003644765.1	CBM61	1
GCA_003644775.1	CBM61	1
GCA_003644785.1	CBM61	1
GCA_003645965.1	CBM61	1
GCA_003854975.1	CBM61	1
B23T1B10	CBM61	1
B3T3L14	CBM61	1
GCA_004356135.1	CBM63	1
GCA_004356825.1	CBM63	1
B79T1L10	CBM63	1
GCA_013359385.1	CBM64	1
GCA_014728115.1	CBM66	11
GCA_003854975.1	CBM66	9
GCA_003854995.1	CBM66	8
203852	CBM66	7
GCA_013359385.1	CBM66	7
GCA_014729735.1	CBM66	7
203742	CBM66	6
GCA_014338045.1	CBM66	6
GCA_003818595.1	CBM66	5
GCA_008363195.1	CBM66	5
GCA_013361015.1	CBM66	5
GCA_014728085.1	CBM66	5
GCA_003576975.1	CBM66	4
GCA_013359425.1	CBM66	4
B23T1B10	CBM66	4
B3T3L14	CBM66	4
GCA_011774205.1	CBM66	3
GCA_011775825.1	CBM66	3
GCA_011777055.1	CBM66	3
GCA_001771235.1	CBM66	2
GCA_002327255.1	CBM66	2
B11D1T2	CBM66	2
GCA_002011685.1	CBM66	1
GCA_002084535.1	CBM66	1
GCA_002898015.1	CBM66	1
GCA_002898095.1	CBM66	1
GCA_004356825.1	CBM66	1
B24T1B10	CBM66	1
B4MC02	CBM66	1
B70T1B8	CBM66	1
B77T1B5	CBM66	1
B79T1L10	CBM66	1
203742	CBM67	19
203852	CBM67	17
GCA_014728115.1	CBM67	15
GCA_003854975.1	CBM67	8
GCA_003854995.1	CBM67	8
GCA_003818595.1	CBM67	7
vent-69	CBM67	7
GCA_014729735.1	CBM67	6
GCA_013361015.1	CBM67	5
GCA_014728085.1	CBM67	5
GCA_013359385.1	CBM67	4
GCA_001771235.1	CBM67	3
GCA_002011685.1	CBM67	3
GCA_008363195.1	CBM67	3
GCA_011774205.1	CBM67	3
GCA_011775825.1	CBM67	3
GCA_011777055.1	CBM67	3
GCA_013359425.1	CBM67	3
GCA_014338045.1	CBM67	3
GCA_002085355.1	CBM67	2
GCA_002898015.1	CBM67	2
GCA_002898095.1	CBM67	2
GCA_003576975.1	CBM67	2
GCA_003644765.1	CBM67	2
GCA_003644775.1	CBM67	2
GCA_003644785.1	CBM67	2
GCA_003645965.1	CBM67	2
GCA_004357015.1	CBM67	2
B16T1L6	CBM67	2
GCA_002084535.1	CBM67	1
GCA_002085035.1	CBM67	1
GCA_002327255.1	CBM67	1
GCA_004356135.1	CBM67	1
GCA_004356185.1	CBM67	1
GCA_004356825.1	CBM67	1
B11D1T2	CBM67	1
B13T1L6	CBM67	1
B23T1B10	CBM67	1
B3T3L14	CBM67	1
B4MC02	CBM67	1
B70T1B8	CBM67	1
B77T1B5	CBM67	1
B79T1L10	CBM67	1
GCA_003818595.1	CBM9	27
GCA_003854975.1	CBM9	18
GCA_013361015.1	CBM9	12
GCA_003576975.1	CBM9	11
GCA_008363195.1	CBM9	10
GCA_013359425.1	CBM9	10
GCA_014338045.1	CBM9	10
GCA_014728115.1	CBM9	10
GCA_001771235.1	CBM9	9
GCA_013359385.1	CBM9	9
GCA_003854995.1	CBM9	8
GCA_014729735.1	CBM9	8
B23T1B10	CBM9	8
GCA_002898095.1	CBM9	7
GCA_003644775.1	CBM9	7
GCA_003645965.1	CBM9	7
GCA_002898015.1	CBM9	6
GCA_003644765.1	CBM9	6
B3T3L14	CBM9	6
GCA_002011685.1	CBM9	5
GCA_002327255.1	CBM9	5
GCA_004356825.1	CBM9	5
B13T1L6	CBM9	5
B4MC02	CBM9	5
GCA_002085355.1	CBM9	4
GCA_014728085.1	CBM9	4
B24T1B10	CBM9	4
B77T1B5	CBM9	4
vent-69	CBM9	4
203852	CBM9	3
GCA_002084535.1	CBM9	3
GCA_003644785.1	CBM9	3
GCA_011774205.1	CBM9	3
GCA_011775825.1	CBM9	3
GCA_011777055.1	CBM9	3
B11D1T2	CBM9	3
B16T1L6	CBM9	3
B79T1L10	CBM9	3
203742	CBM9	2
GCA_002085035.1	CBM9	2
B70T1B8	CBM9	2
GCA_004357015.1	CBM9	1
GCA_003576975.1	CE1	22
GCA_008363195.1	CE1	22
GCA_014338045.1	CE1	21
GCA_013359385.1	CE1	20
GCA_013359425.1	CE1	20
GCA_003818595.1	CE1	17
GCA_013361015.1	CE1	17
GCA_003854975.1	CE1	13
GCA_011774205.1	CE1	13
GCA_011777055.1	CE1	13
B3T3L14	CE1	13
B79T1L10	CE1	13
GCA_004356135.1	CE1	12
GCA_011775825.1	CE1	12
B13T1L6	CE1	12
GCA_002327255.1	CE1	10
GCA_004356825.1	CE1	10
B23T1B10	CE1	9
B11D1T2	CE1	8
B77T1B5	CE1	8
GCA_014728115.1	CE1	7
GCA_014729735.1	CE1	7
B16T1L6	CE1	7
GCA_003854995.1	CE1	6
GCA_004357015.1	CE1	6
B24T1B10	CE1	6
B4MC02	CE1	6
GCA_001771235.1	CE1	5
GCA_002898015.1	CE1	5
vent-69	CE1	5
203742	CE1	4
203852	CE1	4
GCA_002011685.1	CE1	4
GCA_002898095.1	CE1	4
GCA_004356185.1	CE1	4
GCA_002084535.1	CE1	3
GCA_014728085.1	CE1	3
GCA_003644785.1	CE1	2
GCA_002085355.1	CE1	1
GCA_003644765.1	CE1	1
GCA_003644775.1	CE1	1
GCA_003645965.1	CE1	1
GCA_011774205.1	CE10	17
GCA_011775825.1	CE10	17
GCA_011777055.1	CE10	17
B13T1L6	CE10	15
B23T1B10	CE10	15
B79T1L10	CE10	15
B3T3L14	CE10	13
GCA_003818595.1	CE10	12
GCA_004356825.1	CE10	12
GCA_013361015.1	CE10	12
GCA_014728115.1	CE10	11
GCA_002011685.1	CE10	10
B11D1T2	CE10	10
B77T1B5	CE10	10
GCA_003576975.1	CE10	9
GCA_008363195.1	CE10	9
GCA_013359425.1	CE10	9
GCA_014338045.1	CE10	9
GCA_003854975.1	CE10	8
GCA_004356135.1	CE10	8
GCA_013359385.1	CE10	8
GCA_014728085.1	CE10	8
203742	CE10	7
203852	CE10	7
GCA_002327255.1	CE10	7
GCA_003854995.1	CE10	7
GCA_004357015.1	CE10	7
B16T1L6	CE10	7
B4MC02	CE10	7
GCA_002085355.1	CE10	6
B24T1B10	CE10	6
GCA_002898015.1	CE10	5
GCA_004356185.1	CE10	5
GCA_014729735.1	CE10	5
B70T1B8	CE10	5
vent-69	CE10	5
GCA_002084535.1	CE10	4
GCA_002898095.1	CE10	4
GCA_003644765.1	CE10	3
GCA_003644775.1	CE10	3
GCA_003644785.1	CE10	3
GCA_002085035.1	CE10	2
GCA_003645965.1	CE10	2
GCA_001771235.1	CE10	1
203742	CE11	1
203852	CE11	1
GCA_002011685.1	CE11	1
GCA_002084535.1	CE11	1
GCA_002085035.1	CE11	1
GCA_002085355.1	CE11	1
GCA_002327255.1	CE11	1
GCA_002898015.1	CE11	1
GCA_002898095.1	CE11	1
GCA_003576975.1	CE11	1
GCA_003644765.1	CE11	1
GCA_003644775.1	CE11	1
GCA_003644785.1	CE11	1
GCA_003645965.1	CE11	1
GCA_003818595.1	CE11	1
GCA_003854975.1	CE11	1
GCA_003854995.1	CE11	1
GCA_008363195.1	CE11	1
GCA_013359385.1	CE11	1
GCA_013359425.1	CE11	1
GCA_013361015.1	CE11	1
GCA_014338045.1	CE11	1
GCA_014728085.1	CE11	1
GCA_014728115.1	CE11	1
GCA_014729735.1	CE11	1
B23T1B10	CE11	1
B3T3L14	CE11	1
vent-69	CE11	1
GCA_003576975.1	CE12	3
GCA_008363195.1	CE12	3
GCA_014338045.1	CE12	3
GCA_004356135.1	CE12	2
GCA_004356825.1	CE12	2
GCA_013359385.1	CE12	2
B79T1L10	CE12	2
203742	CE12	1
203852	CE12	1
GCA_001771235.1	CE12	1
GCA_002011685.1	CE12	1
GCA_003645965.1	CE12	1
GCA_003854975.1	CE12	1
GCA_004356185.1	CE12	1
GCA_004357015.1	CE12	1
GCA_013361015.1	CE12	1
GCA_014728085.1	CE12	1
GCA_014728115.1	CE12	1
B13T1L6	CE12	1
B3T3L14	CE12	1
GCA_004356825.1	CE14	6
GCA_013359385.1	CE14	5
B11D1T2	CE14	5
B79T1L10	CE14	5
GCA_004356135.1	CE14	4
GCA_013359425.1	CE14	4
B13T1L6	CE14	4
B77T1B5	CE14	4
GCA_002011685.1	CE14	3
GCA_003576975.1	CE14	3
GCA_013361015.1	CE14	3
GCA_014728115.1	CE14	3
B24T1B10	CE14	3
B3T3L14	CE14	3
B4MC02	CE14	3
203742	CE14	2
203852	CE14	2
GCA_003818595.1	CE14	2
GCA_003854995.1	CE14	2
GCA_008363195.1	CE14	2
GCA_011774205.1	CE14	2
GCA_011775825.1	CE14	2
GCA_011777055.1	CE14	2
GCA_014729735.1	CE14	2
B23T1B10	CE14	2
B70T1B8	CE14	2
GCA_001771235.1	CE14	1
GCA_002327255.1	CE14	1
GCA_003644765.1	CE14	1
GCA_003644775.1	CE14	1
GCA_003854975.1	CE14	1
GCA_004356185.1	CE14	1
GCA_014338045.1	CE14	1
GCA_014728085.1	CE14	1
B16T1L6	CE14	1
GCA_014728115.1	CE15	6
203742	CE15	5
203852	CE15	5
GCA_003854995.1	CE15	4
GCA_003818595.1	CE15	3
GCA_003854975.1	CE15	3
GCA_014728085.1	CE15	3
GCA_003644765.1	CE15	2
GCA_014729735.1	CE15	2
GCA_003576975.1	CE15	1
GCA_003644785.1	CE15	1
GCA_003645965.1	CE15	1
GCA_003854975.1	CE2	3
203742	CE2	2
203852	CE2	1
GCA_002327255.1	CE2	1
GCA_003576975.1	CE2	1
GCA_003854995.1	CE2	1
GCA_008363195.1	CE2	1
GCA_013359385.1	CE2	1
GCA_013359425.1	CE2	1
GCA_013361015.1	CE2	1
GCA_014338045.1	CE2	1
203742	CE3	8
GCA_003854975.1	CE3	8
GCA_013359385.1	CE3	7
GCA_014338045.1	CE3	7
203852	CE3	6
GCA_008363195.1	CE3	6
GCA_002327255.1	CE3	5
GCA_003576975.1	CE3	5
GCA_003818595.1	CE3	5
GCA_013359425.1	CE3	5
GCA_014728115.1	CE3	5
GCA_013361015.1	CE3	4
GCA_014729735.1	CE3	4
B23T1B10	CE3	4
GCA_003854995.1	CE3	3
GCA_011774205.1	CE3	3
GCA_011775825.1	CE3	3
GCA_011777055.1	CE3	3
GCA_014728085.1	CE3	3
B3T3L14	CE3	3
GCA_001771235.1	CE3	2
GCA_002085355.1	CE3	2
GCA_003645965.1	CE3	2
B13T1L6	CE3	2
B77T1B5	CE3	2
B79T1L10	CE3	2
GCA_002011685.1	CE3	1
GCA_003644775.1	CE3	1
GCA_004356135.1	CE3	1
GCA_004356185.1	CE3	1
GCA_004356825.1	CE3	1
GCA_004357015.1	CE3	1
B11D1T2	CE3	1
B24T1B10	CE3	1
B4MC02	CE3	1
vent-69	CE3	1
GCA_013359385.1	CE4	17
GCA_003576975.1	CE4	16
GCA_014338045.1	CE4	16
GCA_008363195.1	CE4	15
GCA_011774205.1	CE4	14
GCA_011777055.1	CE4	14
GCA_013359425.1	CE4	14
GCA_011775825.1	CE4	13
GCA_013361015.1	CE4	13
GCA_014729735.1	CE4	8
203742	CE4	7
GCA_004356135.1	CE4	7
B23T1B10	CE4	7
B79T1L10	CE4	7
203852	CE4	6
GCA_002011685.1	CE4	6
GCA_003644765.1	CE4	6
GCA_003645965.1	CE4	6
GCA_003818595.1	CE4	6
GCA_003854975.1	CE4	6
GCA_004356825.1	CE4	6
GCA_014728085.1	CE4	6
B3T3L14	CE4	6
B70T1B8	CE4	6
vent-69	CE4	6
GCA_002898015.1	CE4	5
GCA_002898095.1	CE4	5
GCA_003644775.1	CE4	5
GCA_004356185.1	CE4	5
GCA_014728115.1	CE4	5
B13T1L6	CE4	5
B16T1L6	CE4	5
B4MC02	CE4	5
GCA_001771235.1	CE4	4
GCA_002327255.1	CE4	4
GCA_003854995.1	CE4	4
B24T1B10	CE4	4
B77T1B5	CE4	4
GCA_002085355.1	CE4	3
GCA_004357015.1	CE4	3
B11D1T2	CE4	3
GCA_002085035.1	CE4	2
GCA_003644785.1	CE4	2
GCA_013359425.1	CE5	1
GCA_003818595.1	CE6	6
203852	CE6	3
GCA_003854975.1	CE6	3
203742	CE6	2
GCA_014728085.1	CE6	2
GCA_014728115.1	CE6	2
GCA_001771235.1	CE6	1
GCA_002085355.1	CE6	1
GCA_002327255.1	CE6	1
GCA_003576975.1	CE6	1
GCA_008363195.1	CE6	1
GCA_013359385.1	CE6	1
GCA_013359425.1	CE6	1
GCA_013361015.1	CE6	1
GCA_014338045.1	CE6	1
vent-69	CE6	1
203852	CE7	8
203742	CE7	5
GCA_003854975.1	CE7	5
GCA_003818595.1	CE7	4
GCA_003854995.1	CE7	4
GCA_008363195.1	CE7	4
GCA_013359425.1	CE7	4
GCA_014338045.1	CE7	4
GCA_014728115.1	CE7	4
GCA_003576975.1	CE7	3
GCA_011774205.1	CE7	3
GCA_011777055.1	CE7	3
GCA_013359385.1	CE7	3
GCA_013361015.1	CE7	3
GCA_002327255.1	CE7	2
GCA_002898015.1	CE7	2
GCA_002898095.1	CE7	2
GCA_004356825.1	CE7	2
GCA_011775825.1	CE7	2
GCA_014728085.1	CE7	2
GCA_014729735.1	CE7	2
B23T1B10	CE7	2
B79T1L10	CE7	2
vent-69	CE7	2
GCA_003644775.1	CE7	1
GCA_003644785.1	CE7	1
GCA_003645965.1	CE7	1
GCA_004356185.1	CE7	1
GCA_004357015.1	CE7	1
B16T1L6	CE7	1
B3T3L14	CE7	1
B4MC02	CE7	1
B70T1B8	CE7	1
203742	CE8	2
GCA_013359425.1	CE8	2
GCA_014728085.1	CE8	2
203852	CE8	1
GCA_001771235.1	CE8	1
GCA_003576975.1	CE8	1
GCA_004356135.1	CE8	1
GCA_008363195.1	CE8	1
GCA_011774205.1	CE8	1
GCA_011775825.1	CE8	1
GCA_011777055.1	CE8	1
GCA_013359385.1	CE8	1
GCA_014338045.1	CE8	1
B16T1L6	CE8	1
B4MC02	CE8	1
vent-69	CE8	1
203852	CE9	4
203742	CE9	3
GCA_014728085.1	CE9	3
GCA_003644765.1	CE9	2
GCA_003644775.1	CE9	2
GCA_003645965.1	CE9	2
GCA_014728115.1	CE9	2
GCA_014729735.1	CE9	2
GCA_002085035.1	CE9	1
GCA_002085355.1	CE9	1
GCA_002327255.1	CE9	1
GCA_002898015.1	CE9	1
GCA_002898095.1	CE9	1
GCA_003644785.1	CE9	1
GCA_003818595.1	CE9	1
GCA_003854975.1	CE9	1
GCA_003854995.1	CE9	1
B13T1L6	CE9	1
B79T1L10	CE9	1
vent-69	CE9	1
GCA_013361015.1	cohesin	11
GCA_003645965.1	cohesin	8
GCA_003854975.1	cohesin	7
GCA_002898015.1	cohesin	6
GCA_003644775.1	cohesin	6
GCA_014728115.1	cohesin	6
GCA_002898095.1	cohesin	5
GCA_013359385.1	cohesin	5
vent-69	cohesin	5
203852	cohesin	4
GCA_002011685.1	cohesin	4
GCA_002085355.1	cohesin	4
GCA_003854995.1	cohesin	4
GCA_011774205.1	cohesin	4
GCA_011775825.1	cohesin	4
GCA_011777055.1	cohesin	4
GCA_014728085.1	cohesin	4
GCA_014729735.1	cohesin	4
GCA_002084535.1	cohesin	3
GCA_002327255.1	cohesin	3
GCA_003644765.1	cohesin	3
GCA_013359425.1	cohesin	3
203742	cohesin	2
GCA_003576975.1	cohesin	2
GCA_003644785.1	cohesin	2
GCA_003818595.1	cohesin	2
GCA_004357015.1	cohesin	2
GCA_008363195.1	cohesin	2
GCA_014338045.1	cohesin	2
B16T1L6	cohesin	2
GCA_004356185.1	cohesin	1
GCA_003818595.1	dockerin	3
GCA_014729735.1	dockerin	3
GCA_003854975.1	dockerin	2
GCA_014728115.1	dockerin	2
B11D1T2	dockerin	2
GCA_001771235.1	dockerin	1
GCA_002085355.1	dockerin	1
GCA_003854995.1	dockerin	1
GCA_014728085.1	dockerin	1
GCA_002898015.1	GH1	2
GCA_002898095.1	GH1	2
GCA_003576975.1	GH1	2
GCA_008363195.1	GH1	2
GCA_013359385.1	GH1	2
GCA_013359425.1	GH1	2
GCA_013361015.1	GH1	2
GCA_014338045.1	GH1	2
203742	GH1	1
203852	GH1	1
GCA_002327255.1	GH1	1
GCA_014728085.1	GH1	1
GCA_014728115.1	GH1	1
GCA_014729735.1	GH1	1
vent-69	GH1	1
GCA_003818595.1	GH10	7
GCA_003854975.1	GH10	5
GCA_003576975.1	GH10	4
GCA_003854995.1	GH10	4
GCA_013359385.1	GH10	4
GCA_001771235.1	GH10	3
GCA_008363195.1	GH10	3
GCA_013359425.1	GH10	3
GCA_014338045.1	GH10	3
203742	GH10	2
GCA_002327255.1	GH10	2
GCA_014728085.1	GH10	2
GCA_002085035.1	GH10	1
GCA_002085355.1	GH10	1
GCA_013361015.1	GH10	1
GCA_014728115.1	GH10	1
B23T1B10	GH10	1
B3T3L14	GH10	1
GCA_003854995.1	GH100	1
GCA_008363195.1	GH100	1
GCA_013359385.1	GH100	1
GCA_014729735.1	GH100	1
GCA_014728115.1	GH102	1
GCA_002327255.1	GH103	1
B24T1B10	GH103	1
GCA_003576975.1	GH104	1
GCA_008363195.1	GH105	4
GCA_013359385.1	GH105	4
GCA_013359425.1	GH105	4
GCA_014338045.1	GH105	4
GCA_001771235.1	GH105	3
GCA_003576975.1	GH105	3
203742	GH105	2
203852	GH105	2
GCA_014728115.1	GH105	2
GCA_014729735.1	GH105	2
GCA_002327255.1	GH105	1
GCA_004356135.1	GH105	1
GCA_013361015.1	GH105	1
203852	GH106	12
203742	GH106	11
GCA_014728115.1	GH106	10
GCA_003818595.1	GH106	6
GCA_003854975.1	GH106	5
GCA_003854995.1	GH106	5
GCA_014728085.1	GH106	4
GCA_003576975.1	GH106	2
GCA_003644765.1	GH106	2
GCA_013359385.1	GH106	2
GCA_001771235.1	GH106	1
GCA_002085355.1	GH106	1
GCA_002898015.1	GH106	1
GCA_002898095.1	GH106	1
GCA_003644775.1	GH106	1
GCA_003645965.1	GH106	1
GCA_013359425.1	GH106	1
GCA_013359385.1	GH108	1
GCA_014728115.1	GH109	60
203742	GH109	40
203852	GH109	40
GCA_003854975.1	GH109	39
GCA_003818595.1	GH109	36
GCA_014728085.1	GH109	30
GCA_003854995.1	GH109	28
GCA_008363195.1	GH109	28
GCA_003576975.1	GH109	27
GCA_014338045.1	GH109	26
GCA_013359385.1	GH109	24
GCA_014729735.1	GH109	21
GCA_013361015.1	GH109	20
GCA_003644775.1	GH109	18
GCA_003644765.1	GH109	17
GCA_003645965.1	GH109	17
B23T1B10	GH109	16
GCA_011774205.1	GH109	15
GCA_011775825.1	GH109	15
GCA_011777055.1	GH109	15
GCA_013359425.1	GH109	15
vent-69	GH109	15
B79T1L10	GH109	14
GCA_003644785.1	GH109	13
GCA_004356825.1	GH109	13
GCA_002327255.1	GH109	12
B3T3L14	GH109	12
GCA_001771235.1	GH109	10
GCA_004356185.1	GH109	9
B77T1B5	GH109	9
GCA_004356135.1	GH109	8
GCA_002898015.1	GH109	7
GCA_002898095.1	GH109	7
B13T1L6	GH109	7
B11D1T2	GH109	6
GCA_002011685.1	GH109	5
GCA_002085355.1	GH109	5
B24T1B10	GH109	5
B70T1B8	GH109	5
B16T1L6	GH109	4
B4MC02	GH109	4
GCA_002085035.1	GH109	3
GCA_004357015.1	GH109	3
GCA_002084535.1	GH109	1
GCA_003818595.1	GH112	1
GCA_003854975.1	GH112	1
B11D1T2	GH113	3
B23T1B10	GH113	3
B77T1B5	GH113	3
B79T1L10	GH113	3
GCA_004356135.1	GH113	2
GCA_004356825.1	GH113	2
GCA_011774205.1	GH113	2
GCA_011775825.1	GH113	2
GCA_011777055.1	GH113	2
B13T1L6	GH113	2
B16T1L6	GH113	2
B3T3L14	GH113	2
B4MC02	GH113	2
GCA_002898015.1	GH113	1
GCA_002898095.1	GH113	1
GCA_003576975.1	GH113	1
GCA_004357015.1	GH113	1
GCA_008363195.1	GH113	1
GCA_013359425.1	GH113	1
GCA_013361015.1	GH113	1
GCA_014338045.1	GH113	1
B24T1B10	GH113	1
GCA_002011685.1	GH114	2
GCA_002084535.1	GH114	2
B11D1T2	GH114	2
vent-69	GH114	2
GCA_003818595.1	GH114	1
GCA_004356135.1	GH114	1
GCA_004356185.1	GH114	1
GCA_004356825.1	GH114	1
B13T1L6	GH114	1
B16T1L6	GH114	1
B23T1B10	GH114	1
B24T1B10	GH114	1
B3T3L14	GH114	1
B4MC02	GH114	1
B70T1B8	GH114	1
B77T1B5	GH114	1
B79T1L10	GH114	1
GCA_002327255.1	GH115	2
GCA_008363195.1	GH115	2
GCA_013359385.1	GH115	2
GCA_013361015.1	GH115	2
GCA_014338045.1	GH115	2
203742	GH115	1
203852	GH115	1
GCA_001771235.1	GH115	1
GCA_003576975.1	GH115	1
GCA_003854975.1	GH115	1
GCA_003854995.1	GH115	1
GCA_014728115.1	GH115	1
203742	GH116	2
203852	GH116	2
GCA_003644765.1	GH116	2
GCA_003854975.1	GH116	2
GCA_003644775.1	GH116	1
GCA_003645965.1	GH116	1
GCA_003818595.1	GH116	1
GCA_003854995.1	GH116	1
GCA_013359425.1	GH116	1
GCA_014728085.1	GH116	1
GCA_014728115.1	GH117	8
GCA_003854975.1	GH117	2
GCA_004356825.1	GH117	2
GCA_014728085.1	GH117	2
GCA_014729735.1	GH117	2
B23T1B10	GH117	2
B79T1L10	GH117	2
GCA_003854995.1	GH117	1
B77T1B5	GH117	1
203742	GH120	1
203852	GH120	1
GCA_003854975.1	GH120	1
GCA_008363195.1	GH120	1
GCA_013361015.1	GH120	1
GCA_014338045.1	GH120	1
GCA_014728115.1	GH120	1
203852	GH123	4
203742	GH123	3
GCA_003645965.1	GH123	3
GCA_003644765.1	GH123	2
GCA_003644775.1	GH123	2
GCA_003644785.1	GH123	2
GCA_003818595.1	GH123	2
vent-69	GH123	2
GCA_002011685.1	GH123	1
GCA_002898015.1	GH123	1
GCA_002898095.1	GH123	1
GCA_014728085.1	GH123	1
GCA_014728115.1	GH123	1
GCA_014729735.1	GH123	1
GCA_003854975.1	GH125	1
GCA_003854995.1	GH125	1
GCA_013359425.1	GH125	1
203852	GH127	5
GCA_003818595.1	GH127	5
GCA_014728085.1	GH127	5
203742	GH127	4
GCA_003644765.1	GH127	4
GCA_003854995.1	GH127	4
GCA_003644775.1	GH127	3
GCA_001771235.1	GH127	2
GCA_003644785.1	GH127	2
GCA_003854975.1	GH127	2
GCA_014728115.1	GH127	2
GCA_002085355.1	GH127	1
GCA_002327255.1	GH127	1
GCA_002898015.1	GH127	1
GCA_002898095.1	GH127	1
GCA_003576975.1	GH127	1
GCA_008363195.1	GH127	1
GCA_013359385.1	GH127	1
GCA_013361015.1	GH127	1
GCA_014338045.1	GH127	1
B16T1L6	GH127	1
GCA_002327255.1	GH128	1
GCA_003818595.1	GH128	1
203742	GH129	2
GCA_002085355.1	GH129	2
203852	GH129	1
GCA_003818595.1	GH129	1
GCA_014729735.1	GH129	1
GCA_013359425.1	GH13	15
GCA_011774205.1	GH13	14
GCA_011777055.1	GH13	14
GCA_011775825.1	GH13	13
GCA_003576975.1	GH13	11
GCA_013359385.1	GH13	11
GCA_014729735.1	GH13	11
GCA_003818595.1	GH13	10
GCA_014338045.1	GH13	10
GCA_014728085.1	GH13	10
GCA_008363195.1	GH13	9
203742	GH13	8
GCA_003854975.1	GH13	8
GCA_003854995.1	GH13	6
GCA_014728115.1	GH13	6
203852	GH13	5
GCA_002327255.1	GH13	5
GCA_013361015.1	GH13	5
GCA_002084535.1	GH13	4
GCA_002898015.1	GH13	4
GCA_002898095.1	GH13	4
GCA_002011685.1	GH13	3
GCA_003644775.1	GH13	3
GCA_004357015.1	GH13	3
B16T1L6	GH13	3
GCA_001771235.1	GH13	2
GCA_003644765.1	GH13	2
GCA_003645965.1	GH13	2
GCA_004356135.1	GH13	2
B11D1T2	GH13	2
B13T1L6	GH13	2
B24T1B10	GH13	2
B4MC02	GH13	2
B77T1B5	GH13	2
B79T1L10	GH13	2
vent-69	GH13	2
GCA_002085355.1	GH13	1
GCA_003644785.1	GH13	1
GCA_004356825.1	GH13	1
B23T1B10	GH13	1
B70T1B8	GH13	1
GCA_003644765.1	GH130	5
GCA_003644775.1	GH130	5
GCA_003645965.1	GH130	5
GCA_003854975.1	GH130	5
GCA_004356825.1	GH130	5
GCA_013359385.1	GH130	5
GCA_013359425.1	GH130	5
GCA_014728085.1	GH130	5
GCA_014729735.1	GH130	5
GCA_003854995.1	GH130	4
B23T1B10	GH130	4
203852	GH130	3
GCA_002085035.1	GH130	3
GCA_002085355.1	GH130	3
GCA_002327255.1	GH130	3
GCA_003576975.1	GH130	3
GCA_003644785.1	GH130	3
GCA_014728115.1	GH130	3
B79T1L10	GH130	3
203742	GH130	2
GCA_002011685.1	GH130	2
GCA_002898095.1	GH130	2
GCA_003818595.1	GH130	2
GCA_004356185.1	GH130	2
GCA_004357015.1	GH130	2
GCA_008363195.1	GH130	2
GCA_014338045.1	GH130	2
B11D1T2	GH130	2
GCA_001771235.1	GH130	1
GCA_002898015.1	GH130	1
GCA_004356135.1	GH130	1
GCA_011774205.1	GH130	1
GCA_011775825.1	GH130	1
GCA_011777055.1	GH130	1
GCA_013361015.1	GH130	1
B13T1L6	GH130	1
B3T3L14	GH130	1
vent-69	GH130	1
GCA_013359385.1	GH15	3
GCA_013359425.1	GH15	3
GCA_014338045.1	GH15	3
203742	GH15	2
203852	GH15	2
GCA_003576975.1	GH15	2
GCA_008363195.1	GH15	2
GCA_011774205.1	GH15	2
GCA_011775825.1	GH15	2
GCA_011777055.1	GH15	2
GCA_014728085.1	GH15	2
GCA_014728115.1	GH15	2
GCA_001771235.1	GH15	1
GCA_002011685.1	GH15	1
GCA_002327255.1	GH15	1
GCA_002898015.1	GH15	1
GCA_002898095.1	GH15	1
GCA_004356135.1	GH15	1
GCA_004356825.1	GH15	1
GCA_013361015.1	GH15	1
GCA_014729735.1	GH15	1
B11D1T2	GH15	1
B24T1B10	GH15	1
B77T1B5	GH15	1
B79T1L10	GH15	1
vent-69	GH15	1
GCA_003818595.1	GH16	8
GCA_014728115.1	GH16	5
GCA_013359425.1	GH16	4
203742	GH16	3
GCA_002327255.1	GH16	3
GCA_003854975.1	GH16	3
203852	GH16	2
GCA_003576975.1	GH16	2
GCA_003854995.1	GH16	2
GCA_008363195.1	GH16	2
GCA_013359385.1	GH16	2
GCA_013361015.1	GH16	2
GCA_014338045.1	GH16	2
GCA_014729735.1	GH16	2
GCA_002084535.1	GH16	1
GCA_002898015.1	GH16	1
GCA_002898095.1	GH16	1
GCA_014728085.1	GH16	1
GCA_003854975.1	GH17	1
GCA_003854995.1	GH17	1
GCA_003854975.1	GH18	4
GCA_011774205.1	GH18	4
GCA_011775825.1	GH18	4
GCA_011777055.1	GH18	4
GCA_003818595.1	GH18	3
GCA_013359425.1	GH18	2
GCA_002898015.1	GH18	1
GCA_002898095.1	GH18	1
GCA_003854995.1	GH18	1
GCA_004356185.1	GH18	1
GCA_004356825.1	GH18	1
GCA_008363195.1	GH18	1
GCA_013359385.1	GH18	1
GCA_014338045.1	GH18	1
B13T1L6	GH18	1
B23T1B10	GH18	1
B24T1B10	GH18	1
B3T3L14	GH18	1
B4MC02	GH18	1
B70T1B8	GH18	1
B77T1B5	GH18	1
B79T1L10	GH18	1
vent-69	GH18	1
GCA_003576975.1	GH19	1
GCA_003854975.1	GH19	1
GCA_008363195.1	GH19	1
GCA_013359385.1	GH19	1
GCA_013359425.1	GH19	1
GCA_014338045.1	GH19	1
203852	GH2	15
203742	GH2	13
GCA_003854995.1	GH2	12
GCA_003818595.1	GH2	10
GCA_003854975.1	GH2	10
GCA_014728115.1	GH2	8
GCA_013359425.1	GH2	7
GCA_014728085.1	GH2	7
GCA_014729735.1	GH2	6
GCA_003644775.1	GH2	5
vent-69	GH2	5
GCA_002011685.1	GH2	4
GCA_008363195.1	GH2	4
GCA_013359385.1	GH2	4
GCA_013361015.1	GH2	4
GCA_014338045.1	GH2	4
GCA_001771235.1	GH2	3
GCA_002898015.1	GH2	3
GCA_002898095.1	GH2	3
GCA_003576975.1	GH2	3
GCA_003644765.1	GH2	3
GCA_003644785.1	GH2	3
GCA_002084535.1	GH2	2
GCA_003645965.1	GH2	2
B23T1B10	GH2	2
B3T3L14	GH2	2
GCA_002085035.1	GH2	1
GCA_002085355.1	GH2	1
GCA_002327255.1	GH2	1
GCA_004356135.1	GH2	1
GCA_004356185.1	GH2	1
GCA_004356825.1	GH2	1
GCA_004357015.1	GH2	1
GCA_011774205.1	GH2	1
GCA_011775825.1	GH2	1
GCA_011777055.1	GH2	1
B11D1T2	GH2	1
B13T1L6	GH2	1
B16T1L6	GH2	1
B4MC02	GH2	1
B70T1B8	GH2	1
B77T1B5	GH2	1
B79T1L10	GH2	1
203852	GH20	6
GCA_003818595.1	GH20	5
GCA_014728115.1	GH20	5
203742	GH20	4
GCA_003854975.1	GH20	3
vent-69	GH20	3
GCA_002011685.1	GH20	2
GCA_002327255.1	GH20	2
GCA_003644765.1	GH20	2
GCA_003644775.1	GH20	2
GCA_003854995.1	GH20	2
GCA_014728085.1	GH20	2
GCA_014729735.1	GH20	2
B23T1B10	GH20	2
GCA_002898015.1	GH20	1
GCA_002898095.1	GH20	1
GCA_003644785.1	GH20	1
GCA_003645965.1	GH20	1
GCA_011774205.1	GH20	1
GCA_011775825.1	GH20	1
GCA_011777055.1	GH20	1
GCA_013359385.1	GH20	1
GCA_013359425.1	GH20	1
B16T1L6	GH20	1
B13T1L6	GH23	9
B79T1L10	GH23	9
B24T1B10	GH23	8
B77T1B5	GH23	8
GCA_004356825.1	GH23	7
GCA_011774205.1	GH23	7
GCA_011775825.1	GH23	7
GCA_011777055.1	GH23	7
B3T3L14	GH23	7
B4MC02	GH23	7
B70T1B8	GH23	7
GCA_004356135.1	GH23	6
B16T1L6	GH23	6
B23T1B10	GH23	6
203742	GH23	5
GCA_002011685.1	GH23	5
GCA_002898015.1	GH23	5
GCA_002898095.1	GH23	5
GCA_003644775.1	GH23	5
GCA_003644785.1	GH23	5
GCA_013359425.1	GH23	5
GCA_014338045.1	GH23	5
vent-69	GH23	5
203852	GH23	4
GCA_002085035.1	GH23	4
GCA_002327255.1	GH23	4
GCA_003576975.1	GH23	4
GCA_003644765.1	GH23	4
GCA_003645965.1	GH23	4
GCA_004356185.1	GH23	4
GCA_004357015.1	GH23	4
GCA_008363195.1	GH23	4
GCA_013359385.1	GH23	4
GCA_014728115.1	GH23	4
GCA_014729735.1	GH23	4
B11D1T2	GH23	4
GCA_001771235.1	GH23	3
GCA_002085355.1	GH23	3
GCA_003818595.1	GH23	3
GCA_003854975.1	GH23	3
GCA_013361015.1	GH23	3
GCA_014728085.1	GH23	3
GCA_002084535.1	GH23	2
GCA_003854995.1	GH23	2
GCA_001771235.1	GH24	1
GCA_003576975.1	GH24	1
GCA_008363195.1	GH24	1
GCA_011774205.1	GH24	1
GCA_011775825.1	GH24	1
GCA_011777055.1	GH24	1
GCA_013359385.1	GH24	1
GCA_013361015.1	GH24	1
GCA_014338045.1	GH24	1
GCA_014728115.1	GH24	1
B11D1T2	GH24	1
B13T1L6	GH24	1
B24T1B10	GH24	1
B4MC02	GH24	1
B77T1B5	GH24	1
GCA_003818595.1	GH26	5
GCA_002327255.1	GH26	2
GCA_003854975.1	GH26	2
GCA_003854995.1	GH26	2
GCA_003576975.1	GH26	1
GCA_008363195.1	GH26	1
GCA_013359385.1	GH26	1
GCA_013361015.1	GH26	1
GCA_014338045.1	GH26	1
GCA_014729735.1	GH26	1
GCA_003818595.1	GH27	3
GCA_003854995.1	GH27	3
203742	GH27	1
203852	GH27	1
GCA_002085355.1	GH27	1
GCA_002327255.1	GH27	1
GCA_003576975.1	GH27	1
GCA_003854975.1	GH27	1
GCA_008363195.1	GH27	1
GCA_013359385.1	GH27	1
GCA_014338045.1	GH27	1
vent-69	GH27	1
GCA_014728115.1	GH28	13
203852	GH28	8
GCA_014728085.1	GH28	8
203742	GH28	7
GCA_013359385.1	GH28	6
GCA_003854975.1	GH28	5
GCA_014729735.1	GH28	5
GCA_002327255.1	GH28	4
GCA_003818595.1	GH28	4
GCA_013359425.1	GH28	4
GCA_001771235.1	GH28	3
GCA_003576975.1	GH28	3
vent-69	GH28	3
GCA_014338045.1	GH28	2
GCA_003854995.1	GH28	1
GCA_008363195.1	GH28	1
GCA_003854975.1	GH29	14
GCA_003818595.1	GH29	13
GCA_014728115.1	GH29	8
203742	GH29	6
203852	GH29	6
GCA_003854995.1	GH29	5
GCA_003644775.1	GH29	3
GCA_003644765.1	GH29	2
GCA_013361015.1	GH29	2
GCA_014728085.1	GH29	2
GCA_014729735.1	GH29	2
GCA_001771235.1	GH29	1
GCA_002011685.1	GH29	1
GCA_002085355.1	GH29	1
GCA_002327255.1	GH29	1
GCA_003576975.1	GH29	1
GCA_003644785.1	GH29	1
GCA_008363195.1	GH29	1
GCA_013359385.1	GH29	1
GCA_014338045.1	GH29	1
B23T1B10	GH29	1
vent-69	GH29	1
GCA_003818595.1	GH3	9
GCA_003854975.1	GH3	8
203742	GH3	7
GCA_013359425.1	GH3	7
GCA_014728115.1	GH3	7
GCA_003576975.1	GH3	6
203852	GH3	5
GCA_003854995.1	GH3	5
GCA_008363195.1	GH3	5
GCA_013359385.1	GH3	5
GCA_014338045.1	GH3	5
vent-69	GH3	5
GCA_002327255.1	GH3	4
GCA_013361015.1	GH3	4
GCA_014729735.1	GH3	3
GCA_002011685.1	GH3	2
GCA_002084535.1	GH3	2
GCA_002085355.1	GH3	2
GCA_004356825.1	GH3	2
B79T1L10	GH3	2
GCA_001771235.1	GH3	1
GCA_002898015.1	GH3	1
GCA_002898095.1	GH3	1
GCA_003644785.1	GH3	1
GCA_003645965.1	GH3	1
GCA_011774205.1	GH3	1
GCA_011775825.1	GH3	1
GCA_011777055.1	GH3	1
GCA_003818595.1	GH30	9
GCA_003854975.1	GH30	4
GCA_013359385.1	GH30	4
GCA_014728115.1	GH30	4
GCA_003576975.1	GH30	3
GCA_008363195.1	GH30	3
GCA_014338045.1	GH30	3
GCA_003854995.1	GH30	2
GCA_013359425.1	GH30	2
GCA_013361015.1	GH30	2
GCA_002327255.1	GH30	1
GCA_014729735.1	GH30	1
vent-69	GH31	6
GCA_013359385.1	GH31	3
GCA_013359425.1	GH31	3
GCA_002898015.1	GH31	2
GCA_002898095.1	GH31	2
GCA_003576975.1	GH31	2
GCA_003818595.1	GH31	2
GCA_014728085.1	GH31	2
GCA_014728115.1	GH31	2
203742	GH31	1
203852	GH31	1
GCA_001771235.1	GH31	1
GCA_002011685.1	GH31	1
GCA_002085355.1	GH31	1
GCA_002327255.1	GH31	1
GCA_003644765.1	GH31	1
GCA_003644775.1	GH31	1
GCA_003644785.1	GH31	1
GCA_003645965.1	GH31	1
GCA_003854975.1	GH31	1
GCA_004356135.1	GH31	1
GCA_004356185.1	GH31	1
GCA_014729735.1	GH31	1
B13T1L6	GH31	1
B79T1L10	GH31	1
GCA_013359425.1	GH32	3
GCA_014728115.1	GH32	3
203852	GH32	2
GCA_003644775.1	GH32	2
GCA_013359385.1	GH32	2
GCA_014729735.1	GH32	2
GCA_002085355.1	GH32	1
GCA_003576975.1	GH32	1
GCA_003644765.1	GH32	1
GCA_003818595.1	GH32	1
GCA_003854975.1	GH32	1
GCA_004356185.1	GH32	1
GCA_008363195.1	GH32	1
GCA_014338045.1	GH32	1
GCA_014728085.1	GH32	1
B23T1B10	GH32	1
GCA_014728115.1	GH33	21
203742	GH33	12
203852	GH33	12
GCA_014728085.1	GH33	7
GCA_014729735.1	GH33	6
GCA_003644775.1	GH33	5
GCA_013359425.1	GH33	5
B3T3L14	GH33	5
GCA_003854975.1	GH33	4
GCA_003854995.1	GH33	4
GCA_013361015.1	GH33	4
GCA_002085355.1	GH33	3
GCA_003576975.1	GH33	3
GCA_003645965.1	GH33	3
GCA_003818595.1	GH33	3
GCA_008363195.1	GH33	3
B23T1B10	GH33	3
vent-69	GH33	3
GCA_003644765.1	GH33	2
GCA_011774205.1	GH33	2
GCA_011775825.1	GH33	2
GCA_011777055.1	GH33	2
GCA_014338045.1	GH33	2
GCA_001771235.1	GH33	1
GCA_002011685.1	GH33	1
GCA_002084535.1	GH33	1
GCA_002327255.1	GH33	1
GCA_004357015.1	GH33	1
GCA_013359385.1	GH33	1
GCA_003818595.1	GH35	3
GCA_003644765.1	GH35	2
203742	GH35	1
GCA_002327255.1	GH35	1
GCA_003644785.1	GH35	1
GCA_003854975.1	GH35	1
GCA_014728115.1	GH35	1
203742	GH36	6
203852	GH36	6
GCA_003644765.1	GH36	3
GCA_003644785.1	GH36	3
GCA_003818595.1	GH36	3
GCA_003644775.1	GH36	2
GCA_014728085.1	GH36	2
GCA_002011685.1	GH36	1
GCA_002085035.1	GH36	1
GCA_003576975.1	GH36	1
GCA_003645965.1	GH36	1
GCA_008363195.1	GH36	1
GCA_013359385.1	GH36	1
GCA_013361015.1	GH36	1
GCA_014338045.1	GH36	1
203852	GH37	5
203742	GH37	4
GCA_003576975.1	GH37	3
GCA_013359385.1	GH37	3
GCA_014728085.1	GH37	3
GCA_002327255.1	GH37	2
GCA_003854975.1	GH37	2
GCA_003854995.1	GH37	2
GCA_008363195.1	GH37	2
GCA_013359425.1	GH37	2
GCA_014338045.1	GH37	2
GCA_003818595.1	GH37	1
GCA_014728115.1	GH37	1
203742	GH38	20
203852	GH38	20
GCA_003818595.1	GH38	6
GCA_003644765.1	GH38	5
GCA_014728115.1	GH38	5
vent-69	GH38	5
GCA_002327255.1	GH38	4
GCA_013359425.1	GH38	4
GCA_014338045.1	GH38	4
GCA_014728085.1	GH38	4
GCA_003576975.1	GH38	3
GCA_003644785.1	GH38	3
GCA_003645965.1	GH38	3
GCA_008363195.1	GH38	3
GCA_014729735.1	GH38	3
GCA_002011685.1	GH38	2
GCA_002898095.1	GH38	2
GCA_003644775.1	GH38	2
GCA_003854975.1	GH38	2
GCA_013359385.1	GH38	2
GCA_013361015.1	GH38	2
GCA_001771235.1	GH38	1
GCA_002085355.1	GH38	1
GCA_002898015.1	GH38	1
B77T1B5	GH38	1
GCA_014728115.1	GH39	10
GCA_003854995.1	GH39	3
GCA_013359385.1	GH39	3
GCA_014728085.1	GH39	3
GCA_014729735.1	GH39	3
GCA_002084535.1	GH39	2
GCA_003576975.1	GH39	2
GCA_003818595.1	GH39	2
GCA_013359425.1	GH39	2
203742	GH39	1
203852	GH39	1
GCA_001771235.1	GH39	1
GCA_002085355.1	GH39	1
GCA_002898015.1	GH39	1
GCA_002898095.1	GH39	1
GCA_003644765.1	GH39	1
GCA_004357015.1	GH39	1
GCA_008363195.1	GH39	1
GCA_011774205.1	GH39	1
GCA_011775825.1	GH39	1
GCA_011777055.1	GH39	1
GCA_013361015.1	GH39	1
GCA_014338045.1	GH39	1
B16T1L6	GH39	1
B3T3L14	GH39	1
vent-69	GH39	1
GCA_014728115.1	GH4	4
GCA_008363195.1	GH4	2
GCA_014338045.1	GH4	2
B79T1L10	GH4	2
vent-69	GH4	2
203742	GH4	1
203852	GH4	1
GCA_003576975.1	GH4	1
GCA_003644765.1	GH4	1
GCA_003644785.1	GH4	1
GCA_003854975.1	GH4	1
GCA_003854995.1	GH4	1
GCA_004356825.1	GH4	1
GCA_004357015.1	GH4	1
GCA_013359425.1	GH4	1
GCA_014729735.1	GH4	1
B77T1B5	GH4	1
203742	GH42	3
GCA_003644775.1	GH42	3
GCA_003818595.1	GH42	3
GCA_014728085.1	GH42	3
203852	GH42	2
GCA_003644785.1	GH42	2
GCA_003645965.1	GH42	2
GCA_003854975.1	GH42	2
GCA_013359385.1	GH42	2
GCA_014728115.1	GH42	2
GCA_014729735.1	GH42	2
GCA_001771235.1	GH42	1
GCA_003576975.1	GH42	1
GCA_003644765.1	GH42	1
GCA_013359425.1	GH42	1
GCA_013361015.1	GH42	1
GCA_003818595.1	GH43	10
GCA_001771235.1	GH43	5
GCA_003854975.1	GH43	5
GCA_014728115.1	GH43	3
203742	GH43	2
GCA_002327255.1	GH43	2
GCA_003854995.1	GH43	2
GCA_008363195.1	GH43	2
GCA_014338045.1	GH43	2
GCA_014729735.1	GH43	2
203852	GH43	1
GCA_003576975.1	GH43	1
GCA_004356135.1	GH43	1
GCA_011774205.1	GH43	1
GCA_011775825.1	GH43	1
GCA_011777055.1	GH43	1
GCA_013359385.1	GH43	1
GCA_013361015.1	GH43	1
B79T1L10	GH43	1
GCA_003818595.1	GH44	1
GCA_003854975.1	GH44	1
GCA_003854995.1	GH44	1
GCA_001771235.1	GH46	1
GCA_003818595.1	GH5	20
GCA_002327255.1	GH5	13
GCA_003854975.1	GH5	11
GCA_003854995.1	GH5	9
GCA_014728115.1	GH5	9
GCA_001771235.1	GH5	6
GCA_003576975.1	GH5	6
GCA_008363195.1	GH5	6
GCA_013359385.1	GH5	6
GCA_013359425.1	GH5	6
GCA_013361015.1	GH5	6
GCA_014338045.1	GH5	6
GCA_002898015.1	GH5	5
GCA_002898095.1	GH5	4
GCA_003644765.1	GH5	4
GCA_014729735.1	GH5	4
GCA_003644785.1	GH5	3
GCA_003645965.1	GH5	3
vent-69	GH5	2
203852	GH5	1
GCA_002084535.1	GH5	1
GCA_002085355.1	GH5	1
GCA_003644775.1	GH5	1
GCA_004356185.1	GH5	1
GCA_004356825.1	GH5	1
GCA_004357015.1	GH5	1
GCA_011774205.1	GH5	1
GCA_011775825.1	GH5	1
GCA_011777055.1	GH5	1
B16T1L6	GH5	1
B70T1B8	GH5	1
GCA_003854975.1	GH50	1
GCA_003854995.1	GH50	1
GCA_003818595.1	GH51	7
GCA_003854975.1	GH51	4
GCA_003854995.1	GH51	3
203742	GH51	2
GCA_001771235.1	GH51	2
GCA_003644775.1	GH51	2
GCA_014729735.1	GH51	2
203852	GH51	1
GCA_002327255.1	GH51	1
GCA_003576975.1	GH51	1
GCA_003644765.1	GH51	1
GCA_003645965.1	GH51	1
GCA_008363195.1	GH51	1
GCA_013359385.1	GH51	1
GCA_013359425.1	GH51	1
GCA_014338045.1	GH51	1
GCA_014728085.1	GH51	1
GCA_014728115.1	GH51	1
GCA_014729735.1	GH52	1
GCA_013361015.1	GH53	2
GCA_001771235.1	GH53	1
GCA_003854975.1	GH53	1
GCA_003854995.1	GH53	1
GCA_003818595.1	GH55	1
GCA_003854975.1	GH55	1
GCA_003854995.1	GH55	1
GCA_014728085.1	GH55	1
GCA_014729735.1	GH55	1
vent-69	GH57	5
GCA_002898015.1	GH57	4
GCA_002898095.1	GH57	4
GCA_003644765.1	GH57	4
GCA_003645965.1	GH57	4
GCA_003644775.1	GH57	3
GCA_003644785.1	GH57	3
GCA_004356185.1	GH57	3
GCA_014728085.1	GH57	3
B24T1B10	GH57	3
GCA_002085035.1	GH57	2
GCA_004356135.1	GH57	2
GCA_004356825.1	GH57	2
GCA_014729735.1	GH57	2
B13T1L6	GH57	2
B4MC02	GH57	2
B77T1B5	GH57	2
B79T1L10	GH57	2
203742	GH57	1
203852	GH57	1
GCA_001771235.1	GH57	1
GCA_002011685.1	GH57	1
GCA_002084535.1	GH57	1
GCA_002085355.1	GH57	1
GCA_003576975.1	GH57	1
GCA_004357015.1	GH57	1
GCA_008363195.1	GH57	1
GCA_011774205.1	GH57	1
GCA_011775825.1	GH57	1
GCA_011777055.1	GH57	1
GCA_013359385.1	GH57	1
GCA_013359425.1	GH57	1
GCA_013361015.1	GH57	1
GCA_014338045.1	GH57	1
GCA_014728115.1	GH57	1
B16T1L6	GH57	1
B23T1B10	GH57	1
B3T3L14	GH57	1
B70T1B8	GH57	1
GCA_014729735.1	GH62	2
GCA_003854975.1	GH62	1
203742	GH63	2
GCA_002085355.1	GH63	2
GCA_002898015.1	GH63	1
GCA_002898095.1	GH63	1
GCA_003576975.1	GH63	1
GCA_003644765.1	GH63	1
GCA_003645965.1	GH63	1
GCA_008363195.1	GH63	1
GCA_011774205.1	GH63	1
GCA_011775825.1	GH63	1
GCA_011777055.1	GH63	1
GCA_013359425.1	GH63	1
GCA_014338045.1	GH63	1
B23T1B10	GH63	1
GCA_003644765.1	GH65	2
GCA_003644785.1	GH65	2
GCA_003645965.1	GH65	2
GCA_014728115.1	GH65	2
GCA_001771235.1	GH65	1
GCA_003644775.1	GH65	1
GCA_003854975.1	GH65	1
GCA_003818595.1	GH66	1
GCA_003854975.1	GH66	1
GCA_003576975.1	GH67	2
GCA_014338045.1	GH67	2
GCA_001771235.1	GH67	1
GCA_002327255.1	GH67	1
GCA_008363195.1	GH67	1
GCA_013359385.1	GH67	1
GCA_013359425.1	GH67	1
GCA_003576975.1	GH74	71
GCA_008363195.1	GH74	60
B23T1B10	GH74	52
B3T3L14	GH74	52
GCA_013361015.1	GH74	48
GCA_013359425.1	GH74	45
GCA_014338045.1	GH74	43
GCA_013359385.1	GH74	42
GCA_011774205.1	GH74	40
GCA_011777055.1	GH74	40
GCA_003854975.1	GH74	36
B79T1L10	GH74	33
GCA_004356825.1	GH74	32
GCA_011775825.1	GH74	32
GCA_014728085.1	GH74	28
B77T1B5	GH74	28
B13T1L6	GH74	27
203852	GH74	25
203742	GH74	22
GCA_014729735.1	GH74	22
GCA_014728115.1	GH74	20
B11D1T2	GH74	19
GCA_002327255.1	GH74	18
GCA_002085355.1	GH74	17
GCA_004356135.1	GH74	17
[truncated: 987 more rows]

## Sheet: precentage of clades 
	cladeⅠ	cladeⅡ	cladeⅢ	cladeⅣ
AA2	83.3333	0	50	6.66667
AA3	83.3333	54.5455	83.3333	80
AA4	0	0	0	60
AA6	100	0	83.3333	0
AA9	50	0	0	0
CBM16	100	63.6364	66.6667	0
CBM20	100	63.6364	66.6667	0
CBM23	50	0	0	0
CBM30	83.3333	0	66.6667	0
CBM32	100	72.7273	91.6667	66.6667
CBM35	100	0	100	0
CBM37	66.6667	0	58.3333	0
CBM4	0	0	58.3333	0
CBM40	100	0	83.3333	0
CBM44	100	0	91.6667	0
CBM48	100	63.6364	91.6667	66.6667
CBM50	100	100	100	100
CBM56	83.3333	0	58.3333	0
CBM57	83.3333	63.6364	75	0
CBM6	83.3333	0	66.6667	0
CBM61	0	63.6364	0	0
CBM66	100	0	91.6667	66.6667
CBM67	100	100	100	93.3333
CBM9	100	100	100	86.6667
CE1	100	90.9091	100	93.3333
CE10	100	100	100	100
CE11	100	100	91.6667	0
CE12	83.3333	0	50	0
CE14	100	0	83.3333	93.3333
CE15	0	0	66.6667	0
CE2	100	0	0	0
CE3	100	54.5455	91.6667	86.6667
CE4	100	100	91.6667	100
CE6	100	0	75	0
CE7	100	72.7273	75	66.6667
CE8	83.3333	0	0	0
CE9	0	72.7273	83.3333	0
GH1	100	0	50	0
GH10	100	0	75	0
GH105	100	0	50	0
GH106	50	0	75	0
GH109	100	100	100	100
GH113	83.3333	0	0	86.6667
GH114	0	0	0	73.3333
GH115	83.3333	0	58.3333	0
GH116	0	0	50	0
GH120	50	0	0	0
GH123	0	72.7273	50	0
GH127	83.3333	0	83.3333	0
GH13	100	81.8182	100	93.3333
GH130	100	100	91.6667	66.6667
GH15	100	0	58.3333	60
GH16	100	0	83.3333	0
GH18	66.6667	0	0	73.3333
GH19	83.3333	0	0	0
GH2	100	100	100	93.3333
GH20	0	81.8182	75	0
GH23	100	100	100	100
GH24	83.3333	0	0	53.3333
GH26	83.3333	0	0	0
GH27	66.6667	0	58.3333	0
GH28	83.3333	0	83.3333	0
GH29	83.3333	54.5455	91.6667	0
GH3	100	54.5455	91.6667	0
GH30	100	0	50	0
GH31	50	72.7273	83.3333	0
GH32	83.3333	0	58.3333	0
GH33	100	63.6364	100	0
GH36	83.3333	54.5455	0	0
GH37	83.3333	0	66.6667	0
GH38	100	72.7273	83.3333	0
GH39	100	0	83.3333	0
GH4	66.6667	0	50	0
GH42	66.6667	0	66.6667	0
GH43	83.3333	0	75	0
GH5	100	63.6364	83.3333	53.3333
GH51	83.3333	0	83.3333	0
GH57	100	100	66.6667	93.3333
GH63	66.6667	0	0	0
GH67	83.3333	0	0	0
GH74	100	90.9091	100	100
GH76	0	0	50	0
GH77	100	0	0	0
GH78	100	81.8182	100	0
GH88	100	0	83.3333	0
GH9	100	54.5455	66.6667	0
GH92	0	0	58.3333	0
GH93	0	0	58.3333	0
GH94	100	0	50	0
GH95	0	0	66.6667	0
GH97	0	0	75	0
GH99	0	0	66.6667	0
GT11	50	0	0	0
GT19	100	72.7273	91.6667	60
GT2	100	100	100	100
GT21	83.3333	0	58.3333	0
GT26	100	0	66.6667	0
GT27	0	63.6364	0	0
GT28	100	81.8182	91.6667	93.3333
GT30	100	81.8182	91.6667	0
GT35	100	90.9091	91.6667	93.3333
GT39	83.3333	0	50	0
GT4	100	100	100	100
GT5	100	81.8182	100	100
GT51	100	90.9091	100	80
GT81	83.3333	0	0	93.3333
GT83	100	72.7273	91.6667	100
GT87	100	0	0	0
GT9	100	100	100	80
GT94	83.3333	63.6364	0	0
PL1	83.3333	0	66.6667	0
PL11	0	0	66.6667	0
PL12	100	54.5455	83.3333	60
PL15	83.3333	0	50	0
PL17	83.3333	0	50	0
PL21	83.3333	0	0	0
PL22	100	100	100	86.6667
PL5	0	0	50	0
PL9	100	0	83.3333	0
