# Supplementary material for: Phylogeny, distribution and potential metabolism of candidate bacterial phylum KSB1
Source: PeerJ. 2022 Apr 12;10:e13241. doi: 10.7717/peerj.13241 (PMC9012183; doi:10.7717/peerj.13241)
Supplement: Supplemental Information 7 [file peerj-10-13241-s007.xlsx]

## Sheet: Sheet1
	clade Ⅰ							clades Ⅱ												clade III													clades Ⅳ
KEGG	GCA_013361015.1	GCA_013359425.1	GCA_003576975.1	GCA_013359385.1	GCA_008363195.1	GCA_014338045.1		GCA_002011685.1	B23T1B10	B3T3L14	vent-69	GCA_002898015.1	GCA_002898095.1	GCA_002085035.1	GCA_003645965.1	GCA_003644765.1	GCA_003644775.1	GCA_003644785.1		GCA_002085355.1	GCA_002084535.1	GCA_014729735.1	GCA_003818595.1	GCA_002327255.1	GCA_014728085.1	GCA_014728115.1	GCA_003854975.1	GCA_003854995.1	GCA_001771235.1	203742	203852		GCA_011775825.1	GCA_011774205.1	GCA_011777055.1	B16T1L6	GCA_004357015.1	B13T1L6	GCA_004356135.1	GCA_004356185.1	GCA_004356825.1	B79T1L10	B11D1T2	B77T1B5	B4MC02	B24T1B10	B70T1B8
K00845	0	0	0	1	0	0		2	1	1	3	2	2	1	3	2	2	3		2	1	1	1	2	2	2	2	2	2	2	2		0	0	0	1	0	0	0	0	0	0	0	0	0	0	0	glk; glucokinase [EC:2.7.1.2]
K01810	0	0	0	0	0	0		0	1	1	1	1	1	0	1	0	1	1		1	0	0	1	0	0	1	1	1	0	1	1		0	0	0	0	0	0	0	0	0	0	0	0	0	0	0	GPI, pgi; glucose-6-phosphate isomerase [EC:5.3.1.9]
K13810	1	1	1	1	1	1		0	0	0	0	0	0	0	0	0	0	0		0	0	0	0	0	0	0	0	0	0	0	0		0	0	0	1	0	1	0	0	1	1	1	0	1	1	0	tal-pgi; transaldolase / glucose-6-phosphate isomerase [EC:2.2.1.2 5.3.1.9]
K15916	1	0	0	0	0	0		1	1	1	1	1	1	1	1	1	1	1		0	1	0	1	0	0	0	0	1	1	0	0		1	1	1	1	1	1	1	1	1	1	1	2	1	1	1	pgi-pmi; glucose/mannose-6-phosphate isomerase [EC:5.3.1.9 5.3.1.8]
K00850	0	0	1	1	1	1		0	0	0	1	1	1	0	1	1	1	1		1	0	1	0	0	0	0	0	1	0	0	0		0	0	0	0	0	0	0	0	0	0	0	0	0	0	0	pfkA, PFK; 6-phosphofructokinase 1 [EC:2.7.1.11]
K16370	0	0	0	0	0	0		0	0	0	1	0	0	0	0	0	0	0		0	0	1	0	0	1	1	0	0	0	0	0		0	0	0	0	0	0	0	0	0	0	0	0	0	0	0	pfkB; 6-phosphofructokinase 2 [EC:2.7.1.11]
K21071	3	3	1	2	2	2		1	2	2	1	1	0	1	0	1	1	0		0	1	0	1	1	1	1	0	0	1	1	1		2	2	2	1	0	1	1	0	1	1	0	1	1	0	0	pfk, pfp; ATP-dependent phosphofructokinase / diphosphate-dependent phosphofructokinase [EC:2.7.1.11 2.7.1.90]
K00895	0	0	0	0	0	0		0	0	0	0	0	0	0	0	0	0	0		0	0	0	0	0	0	0	0	0	0	0	0		0	0	0	0	0	0	0	0	0	0	0	0	0	0	0	pfp, PFP; diphosphate-dependent phosphofructokinase [EC:2.7.1.90]
K03841	1	1	1	2	1	1		1	1	1	1	1	1	0	0	0	0	0		0	1	1	0	0	0	0	0	0	0	0	0		2	2	2	1	1	1	1	0	0	1	1	1	1	0	0	FBP, fbp; fructose-1,6-bisphosphatase I [EC:3.1.3.11]
K01623	0	0	0	0	0	0		0	0	0	0	0	0	0	0	0	0	0		0	0	0	0	0	0	0	0	1	0	0	0		0	0	0	0	0	1	1	1	1	1	1	1	1	1	1	ALDO; fructose-bisphosphate aldolase, class I [EC:4.1.2.13]
K11645	0	0	0	0	0	0		0	1	1	0	0	0	0	0	0	0	0		0	0	1	0	0	0	1	1	0	0	0	0		0	0	0	1	1	0	0	0	0	0	0	0	0	0	0	fbaB; fructose-bisphosphate aldolase, class I [EC:4.1.2.13]
K01624	0	0	0	0	0	0		1	0	0	1	1	1	1	0	1	2	1		1	1	2	2	1	2	2	2	1	1	1	1		0	0	0	0	0	0	0	0	0	0	0	0	0	0	0	FBA, fbaA; fructose-bisphosphate aldolase, class II [EC:4.1.2.13]
K16305	0	0	0	0	0	0		0	0	0	1	1	1	0	0	0	0	0		0	0	0	0	0	0	0	0	0	0	0	0		0	0	0	0	0	0	0	0	0	0	0	0	0	0	0	K16305; fructose-bisphosphate aldolase / 6-deoxy-5-ketofructose 1-phosphate synthase [EC:4.1.2.13 2.2.1.11]
K01803	3	1	1	1	1	1		1	1	1	1	1	1	1	1	1	1	0		1	1	1	1	1	1	1	1	1	1	1	1		1	1	1	0	1	1	1	0	1	1	1	1	1	1	1	TPI, tpiA; triosephosphate isomerase (TIM) [EC:5.3.1.1]
K00134	1	1	1	1	1	1		1	1	1	1	2	2	0	1	1	1	1		1	1	1	1	1	2	2	1	1	1	1	1		1	1	1	0	1	2	1	0	1	1	1	1	1	1	1	GAPDH, gapA; glyceraldehyde 3-phosphate dehydrogenase [EC:1.2.1.12]
K00927	2	1	1	1	1	1		1	1	1	2	1	1	1	1	1	1	1		1	0	1	1	1	2	1	1	0	0	1	1		1	1	1	1	0	1	1	1	0	1	2	1	1	1	0	PGK, pgk; phosphoglycerate kinase [EC:2.7.2.3]
K01834	1	1	0	1	1	1		0	0	0	1	1	1	0	0	0	0	0		0	0	0	0	0	0	0	0	0	0	0	0		1	1	1	0	0	1	1	1	1	0	1	1	1	1	0	PGAM, gpmA; 2,3-bisphosphoglycerate-dependent phosphoglycerate mutase [EC:5.4.2.11]
K15633	0	0	0	0	0	0		0	0	0	0	0	0	0	0	0	0	0		1	1	1	2	1	1	1	1	1	1	1	1		0	0	0	0	0	0	0	0	0	0	0	0	0	0	0	gpmI; 2,3-bisphosphoglycerate-independent phosphoglycerate mutase [EC:5.4.2.12]
K15634	0	0	0	0	0	0		0	0	0	0	0	0	0	0	0	0	0		0	0	0	0	0	0	0	1	0	0	0	0		0	0	0	0	0	0	0	0	0	0	0	0	0	0	0	gpmB; probable phosphoglycerate mutase [EC:5.4.2.12]
K15635	0	0	0	0	0	0		1	1	1	0	0	0	1	1	1	1	1		0	0	1	0	1	1	1	1	0	0	1	1		0	0	0	0	0	0	0	0	0	1	0	0	0	0	0	apgM; 2,3-bisphosphoglycerate-independent phosphoglycerate mutase [EC:5.4.2.12]
K01689	1	1	1	0	1	1		1	1	2	1	1	1	1	1	1	1	1		1	1	1	2	1	1	1	1	1	1	2	1		1	1	1	1	0	1	1	2	1	1	1	1	1	0	0	ENO, eno; enolase [EC:4.2.1.11]
K00873	1	2	1	2	1	1		0	1	1	1	2	2	1	1	2	1	1		2	1	2	0	1	2	2	1	1	0	1	1		3	3	3	0	1	2	1	2	1	1	1	1	1	0	0	PK, pyk; pyruvate kinase [EC:2.7.1.40]
K00163	0	0	0	0	0	0		1	1	1	0	0	0	0	0	0	0	0		0	0	1	1	0	1	1	1	0	0	0	0		1	1	1	1	1	1	1	0	1	2	2	1	1	1	1	aceE; pyruvate dehydrogenase E1 component [EC:1.2.4.1]
K00161	0	0	0	0	0	0		0	0	0	0	0	0	0	0	0	0	0		0	0	0	0	1	1	1	0	0	0	1	1		0	0	0	0	0	0	0	0	0	0	0	0	0	0	0	PDHA, pdhA; pyruvate dehydrogenase E1 component alpha subunit [EC:1.2.4.1]
K00162	0	0	0	0	0	0		0	0	0	0	0	0	0	1	1	1	1		0	0	2	0	0	2	3	0	0	0	2	2		0	0	0	0	0	0	1	1	1	1	0	0	0	0	0	PDHB, pdhB; pyruvate dehydrogenase E1 component beta subunit [EC:1.2.4.1]
K00627	0	1	1	0	1	0		2	0	1	0	0	0	0	0	1	1	0		0	0	2	1	1	2	2	1	0	0	1	1		1	1	1	1	1	1	1	1	1	1	1	1	1	1	1	DLAT, aceF, pdhC; pyruvate dehydrogenase E2 component (dihydrolipoamide acetyltransferase) [EC:2.3.1.12]
K00382	0	1	1	1	1	1		1	3	3	1	2	2	1	0	0	1	1		0	0	2	0	1	2	2	3	0	1	1	1		2	2	2	1	0	1	1	0	0	2	1	1	0	1	0	DLD, lpd, pdhD; dihydrolipoamide dehydrogenase [EC:1.8.1.4]
K00169	0	0	0	0	0	0		1	0	0	1	0	1	0	0	0	0	0		0	0	0	0	0	0	0	0	0	0	1	1		0	0	0	0	0	0	0	0	0	0	0	0	0	0	0	porA; pyruvate ferredoxin oxidoreductase alpha subunit [EC:1.2.7.1]
K00170	0	0	0	0	0	0		1	0	0	1	0	1	0	0	0	0	0		0	0	0	0	0	0	0	0	0	0	1	1		0	0	0	0	0	0	0	0	0	0	0	0	0	0	0	porB; pyruvate ferredoxin oxidoreductase beta subunit [EC:1.2.7.1]
K00172	0	0	0	0	0	0		1	0	0	1	0	1	0	0	0	0	0		0	0	0	0	0	0	0	0	0	0	1	0		0	0	0	0	0	0	0	0	0	0	0	0	0	0	0	porG; pyruvate ferredoxin oxidoreductase gamma subunit [EC:1.2.7.1]
K00171	0	0	0	0	0	0		0	0	0	0	0	0	0	0	0	0	0		0	0	0	0	0	0	0	0	0	0	0	0		0	0	0	0	0	0	0	0	0	0	0	0	0	0	0	porD; pyruvate ferredoxin oxidoreductase delta subunit [EC:1.2.7.1]
K03737	0	1	1	1	1	1		1	0	0	1	1	1	1	2	1	1	1		1	1	1	0	1	1	1	1	0	1	1	1		1	1	1	0	0	0	0	0	0	0	0	0	0	0	0	por, nifJ; pyruvate-ferredoxin/flavodoxin oxidoreductase [EC:1.2.7.1 1.2.7.-]
K00174	1	3	3	2	3	3		1	1	1	1	1	1	1	3	3	3	3		4	1	4	2	1	2	2	1	0	3	2	1		1	1	1	0	0	2	2	1	1	2	2	2	1	1	1	korA, oorA, oforA; 2-oxoglutarate/2-oxoacid ferredoxin oxidoreductase subunit alpha [EC:1.2.7.3 1.2.7.11]
K00175	2	3	3	3	3	3		1	1	1	1	1	1	1	2	2	2	2		3	1	4	1	1	2	2	2	0	3	2	1		1	1	1	0	0	2	2	0	1	2	2	2	2	1	2	korB, oorB, oforB; 2-oxoglutarate/2-oxoacid ferredoxin oxidoreductase subunit beta [EC:1.2.7.3 1.2.7.11]
K00016	0	0	0	0	0	0		0	0	0	0	0	0	0	0	1	0	1		0	0	0	0	0	0	1	1	1	0	0	0		0	0	0	0	0	0	0	0	0	0	0	0	0	0	0	LDH, ldh; L-lactate dehydrogenase [EC:1.1.1.27]
K13953	0	0	0	0	0	0		2	0	0	1	1	1	0	1	1	1	1		0	0	0	0	0	0	0	0	0	0	0	0		0	0	0	0	0	0	0	0	0	0	0	0	0	0	0	adhP; alcohol dehydrogenase, propanol-preferring [EC:1.1.1.1]
K00128	0	1	1	1	2	1		0	0	0	0	0	0	0	0	0	0	0		0	0	0	0	0	0	0	0	0	0	0	0		0	0	0	0	0	0	0	0	0	0	0	1	0	1	0	ALDH; aldehyde dehydrogenase (NAD+) [EC:1.2.1.3]
K01895	1	1	1	0	1	0		0	1	1	1	1	0	0	0	0	0	0		0	0	0	0	0	0	0	1	0	1	0	0		1	1	1	0	0	1	0	0	1	1	0	1	0	0	1	ACSS1_2, acs; acetyl-CoA synthetase [EC:6.2.1.1]
K01905	0	0	0	0	0	0		0	0	0	0	0	0	0	0	0	0	0		1	0	1	1	0	1	0	2	0	0	0	0		1	1	1	1	0	0	0	0	1	0	0	0	0	0	0	acdA; acetate---CoA ligase (ADP-forming) subunit alpha [EC:6.2.1.13]
K22224	0	1	1	1	1	1		0	0	0	0	0	0	0	0	0	0	0		1	0	1	1	0	1	0	2	0	0	0	0		1	1	1	1	0	0	0	0	1	0	0	0	0	0	0	acdB; acetate---CoA ligase (ADP-forming) subunit beta [EC:6.2.1.13]
K01785	1	1	1	1	2	3		1	0	0	1	1	0	0	0	0	0	0		0	0	0	2	1	1	2	1	1	1	2	1		0	0	0	0	0	0	0	0	0	0	0	0	0	0	0	galM, GALM; aldose 1-epimerase [EC:5.1.3.3]
K20866	0	0	0	0	0	0		0	0	0	0	0	0	0	0	0	0	0		1	0	1	1	1	0	1	0	0	1	0	0		0	0	0	0	0	0	0	0	0	0	0	0	0	0	0	yihX; glucose-1-phosphatase [EC:3.1.3.10]
K01835	0	0	0	0	0	0		0	0	0	0	0	0	0	0	0	0	0		0	0	0	0	0	0	1	1	0	0	0	0		0	0	0	0	0	0	0	0	0	0	0	0	0	0	0	pgm; phosphoglucomutase [EC:5.4.2.2]
K15778	1	1	1	1	1	1		0	1	1	1	1	1	1	1	1	1	2		1	1	1	1	1	0	1	1	0	0	0	0		0	0	0	1	1	1	1	1	1	0	1	1	1	1	1	pmm-pgm; phosphomannomutase / phosphoglucomutase [EC:5.4.2.8 5.4.2.2]
K00886	1	1	1	1	1	1		0	0	0	0	0	0	0	0	0	0	0		0	0	0	0	0	0	0	0	0	0	0	0		1	1	1	0	0	0	0	0	0	0	0	0	0	0	0	ppgK; polyphosphate glucokinase [EC:2.7.1.63]
K01792	0	0	0	0	0	0		0	0	0	0	0	0	0	0	0	0	0		0	0	0	0	1	0	0	0	0	0	0	0		0	0	0	0	0	0	0	0	0	0	0	0	0	0	0	E5.1.3.15; glucose-6-phosphate 1-epimerase [EC:5.1.3.15]
K18978	0	0	0	0	0	0		0	0	0	0	0	0	0	0	0	0	0		0	0	1	0	0	0	0	0	0	0	0	0		0	0	0	0	0	0	0	0	0	0	0	0	0	0	0	gapN; glyceraldehyde-3-phosphate dehydrogenase [NAD(P)+] [EC:1.2.1.90]
K01596	0	0	0	0	0	0		0	0	0	0	0	0	1	1	1	1	1		0	0	0	0	1	0	0	0	0	1	1	1		0	0	0	0	0	0	0	0	0	0	0	0	0	0	0	E4.1.1.32, pckA, PCK; phosphoenolpyruvate carboxykinase (GTP) [EC:4.1.1.32]
K01610	1	1	1	1	1	2		1	1	1	0	0	0	0	0	0	0	0		0	0	1	2	0	1	1	1	1	0	0	0		0	0	0	1	1	1	1	1	1	1	2	1	1	1	1	E4.1.1.49, pckA; phosphoenolpyruvate carboxykinase (ATP) [EC:4.1.1.49]
K01222	0	0	0	0	0	0		0	0	0	0	0	0	0	0	0	0	0		0	0	0	0	0	0	1	1	0	0	1	0		0	0	0	0	0	0	0	0	0	0	0	0	0	0	0	E3.2.1.86A, celF; 6-phospho-beta-glucosidase [EC:3.2.1.86]
K01647	1	2	1	2	2	1		1	1	1	1	1	1	1	1	1	1	1		0	0	0	0	0	0	0	1	1	1	0	0		2	2	2	0	0	2	1	1	1	1	1	2	1	1	1	CS, gltA; citrate synthase [EC:2.3.3.1]
K05942	0	0	0	0	0	0		0	0	0	0	0	0	0	0	0	0	0		0	0	0	1	2	1	2	0	0	0	1	1		0	0	0	0	0	0	0	0	0	0	0	0	0	0	0	E2.3.3.3; citrate (Re)-synthase [EC:2.3.3.3]
K01681	0	0	0	0	0	0		0	1	1	1	1	1	0	0	0	0	0		0	0	0	1	0	1	1	1	0	0	1	1		0	0	0	0	1	0	1	0	1	1	0	1	0	0	0	ACO, acnA; aconitate hydratase [EC:4.2.1.3]
K00031	0	1	1	1	1	1		1	1	1	1	1	1	0	0	0	0	0		0	0	0	0	0	0	0	0	0	0	1	0		0	0	0	0	0	0	0	0	0	0	0	0	0	0	0	IDH1, IDH2, icd; isocitrate dehydrogenase [EC:1.1.1.42]
K00030	1	1	1	0	1	1		0	0	0	0	0	0	0	0	0	0	0		0	0	0	0	0	0	0	0	0	0	0	0		0	0	0	0	0	0	0	0	0	0	0	0	0	0	0	IDH3; isocitrate dehydrogenase (NAD+) [EC:1.1.1.41]
K00164	0	1	0	1	1	0		0	1	1	1	0	0	0	0	0	0	0		0	0	0	0	0	0	0	0	0	1	0	0		1	1	1	0	0	0	0	0	0	0	0	0	0	0	0	OGDH, sucA; 2-oxoglutarate dehydrogenase E1 component [EC:1.2.4.2]
K00658	1	1	1	0	1	1		1	2	2	1	0	0	0	0	0	0	0		0	0	0	0	1	1	1	0	0	1	1	1		1	1	1	1	1	1	1	1	1	1	1	1	1	1	1	DLST, sucB; 2-oxoglutarate dehydrogenase E2 component (dihydrolipoamide succinyltransferase) [EC:2.3.1.61]
K00177	2	1	1	1	1	1		1	0	0	1	1	1	1	2	2	2	1		3	1	3	1	1	2	2	1	0	2	2	1		1	1	1	0	0	0	0	0	0	0	0	0	0	0	0	korC, oorC; 2-oxoglutarate ferredoxin oxidoreductase subunit gamma [EC:1.2.7.3]
K00176	1	1	1	1	1	1		1	0	0	1	1	1	1	2	2	2	1		3	1	3	1	2	2	2	1	0	2	2	1		0	0	0	0	0	0	0	0	0	0	0	0	0	0	0	korD, oorD; 2-oxoglutarate ferredoxin oxidoreductase subunit delta [EC:1.2.7.3]
K01902	1	1	1	1	1	1		1	1	2	2	2	2	0	1	1	2	2		1	1	1	0	1	1	1	0	0	1	1	1		1	1	1	0	1	1	0	1	1	1	1	1	1	1	1	sucD; succinyl-CoA synthetase alpha subunit [EC:6.2.1.5]
K01903	1	1	1	0	1	1		1	1	1	1	1	1	0	1	1	1	1		1	0	0	0	1	1	1	1	0	1	1	1		1	1	1	0	1	1	0	1	1	1	1	1	1	1	1	sucC; succinyl-CoA synthetase beta subunit [EC:6.2.1.5]
K00239	1	1	0	1	1	1		0	2	1	2	1	1	0	0	0	0	0		0	0	2	0	1	1	2	0	0	1	1	1		2	2	2	1	0	1	0	0	1	1	0	0	1	0	0	sdhA, frdA; succinate dehydrogenase / fumarate reductase, flavoprotein subunit [EC:1.3.5.1 1.3.5.4]
K00240	0	1	1	1	1	1		0	2	1	2	1	1	0	0	0	0	0		0	1	1	0	1	1	2	0	0	2	1	1		2	2	2	1	0	1	0	0	2	2	2	2	1	2	1	sdhB, frdB; succinate dehydrogenase / fumarate reductase, iron-sulfur subunit [EC:1.3.5.1 1.3.5.4]
K00241	1	1	1	1	1	2		0	1	1	0	0	0	0	0	0	0	0		0	0	0	0	0	1	2	0	0	1	1	1		1	1	1	1	0	0	1	0	0	0	1	1	0	1	0	sdhC, frdC; succinate dehydrogenase / fumarate reductase, cytochrome b subunit
K00242	0	0	0	0	0	0		0	0	0	0	0	0	0	0	0	0	0		0	0	0	0	0	0	0	0	0	0	0	0		0	0	0	0	0	0	0	0	0	0	0	0	0	0	0	sdhD, frdD; succinate dehydrogenase / fumarate reductase, membrane anchor subunit
K00244	0	0	0	0	0	0		0	0	0	0	0	0	0	0	0	0	0		0	0	0	0	0	0	0	0	0	0	1	0		0	0	0	0	0	0	0	0	1	1	0	0	0	0	0	frdA; fumarate reductase flavoprotein subunit [EC:1.3.5.4]
K00245	0	0	0	0	0	0		0	1	1	1	1	1	0	0	0	0	0		0	0	0	0	1	1	1	0	0	1	1	0		0	0	0	0	0	1	0	0	1	1	0	1	1	0	0	frdB; fumarate reductase iron-sulfur subunit [EC:1.3.5.4]
K00246	0	0	0	0	0	0		0	1	1	0	0	0	0	0	0	0	0		0	0	0	0	0	0	0	0	0	0	0	0		0	0	0	0	0	1	0	0	1	1	0	1	1	0	0	frdC; fumarate reductase subunit C
K00247	0	0	0	0	0	0		0	0	0	0	0	0	0	0	0	0	0		0	0	0	0	0	0	0	0	0	0	0	0		0	0	0	0	0	0	0	0	1	1	1	1	1	0	0	frdD; fumarate reductase subunit D
K01676	0	0	0	0	0	0		1	0	0	0	1	1	0	0	0	0	0		1	1	1	0	1	0	1	1	1	1	0	0		0	0	0	0	0	0	0	0	0	0	0	0	0	0	0	E4.2.1.2A, fumA, fumB; fumarate hydratase, class I [EC:4.2.1.2]
K01677	0	0	0	0	0	0		0	0	0	0	1	1	0	1	0	1	1		0	0	0	1	1	1	0	0	0	0	1	1		0	0	0	0	0	0	0	0	0	0	0	0	0	0	0	E4.2.1.2AA, fumA; fumarate hydratase subunit alpha [EC:4.2.1.2]
K01678	0	0	0	0	0	0		0	0	0	0	1	1	0	1	0	1	0		0	0	0	1	1	1	0	0	0	0	1	1		0	0	0	0	0	0	0	0	0	0	0	0	0	0	0	E4.2.1.2AB, fumB; fumarate hydratase subunit beta [EC:4.2.1.2]
K01679	1	1	1	0	1	1		0	1	1	1	0	0	0	0	0	0	0		0	0	0	0	0	0	0	0	0	0	0	0		1	1	1	1	0	1	1	0	1	1	1	1	1	1	2	E4.2.1.2B, fumC, FH; fumarate hydratase, class II [EC:4.2.1.2]
K00024	0	1	2	2	2	2		1	1	1	1	1	1	0	0	0	1	1		1	1	1	0	0	0	0	0	0	0	0	0		0	0	0	1	0	1	1	0	0	0	1	1	0	1	1	mdh; malate dehydrogenase [EC:1.1.1.37]
K01958	0	0	0	0	0	1		0	0	0	0	0	0	0	0	0	0	0		0	0	0	0	0	0	0	0	0	0	0	0		0	0	0	0	0	0	0	0	0	0	0	0	0	0	0	PC, pyc; pyruvate carboxylase [EC:6.4.1.1]
K00036	1	1	1	1	1	1		1	0	0	0	0	0	0	0	0	0	0		0	0	0	1	0	2	0	1	1	0	1	1		2	2	2	0	0	0	0	0	0	0	0	0	0	0	0	G6PD, zwf; glucose-6-phosphate 1-dehydrogenase [EC:1.1.1.49 1.1.1.363]
K01057	1	1	1	1	1	1		0	0	0	0	0	0	0	0	0	0	0		0	0	0	1	0	2	0	1	1	0	1	1		0	0	0	0	0	0	0	0	0	0	0	0	0	0	0	PGLS, pgl, devB; 6-phosphogluconolactonase [EC:3.1.1.31]
K07404	2	1	1	1	4	4		0	1	1	1	0	0	0	0	0	0	0		0	0	0	1	0	0	1	1	1	0	1	1		0	0	0	0	0	0	1	1	1	1	1	0	1	1	1	pgl; 6-phosphogluconolactonase [EC:3.1.1.31]
K00033	0	1	1	1	1	1		1	0	0	1	0	0	0	1	1	0	1		0	0	0	3	1	2	2	1	0	1	3	1		3	3	3	1	0	0	0	0	0	0	0	0	0	0	0	PGD, gnd, gntZ; 6-phosphogluconate dehydrogenase [EC:1.1.1.44 1.1.1.343]
K01783	1	1	0	1	1	1		1	1	1	1	1	1	1	1	1	1	1		1	1	1	1	1	1	1	1	1	0	1	1		1	1	1	0	1	1	0	0	0	1	1	1	1	1	0	rpe, RPE; ribulose-phosphate 3-epimerase [EC:5.1.3.1]
K00615	1	1	1	1	1	1		1	2	1	1	1	1	1	2	2	1	2		1	0	3	1	1	2	4	2	1	2	1	1		2	2	2	2	0	1	1	4	1	1	1	1	1	1	0	E2.2.1.1, tktA, tktB; transketolase [EC:2.2.1.1]
K00616	1	1	1	1	1	1		2	2	2	2	2	2	0	1	1	1	0		1	1	1	1	2	2	3	0	0	1	1	1		1	1	1	1	1	0	0	0	0	0	0	0	0	0	0	E2.2.1.2, talA, talB; transaldolase [EC:2.2.1.2]
K01807	1	1	1	1	1	1		0	0	0	0	0	0	0	0	0	0	0		0	0	0	0	0	0	0	0	0	0	0	0		0	0	0	0	1	1	0	0	0	1	1	1	1	0	1	rpiA; ribose 5-phosphate isomerase A [EC:5.3.1.6]
K01808	1	1	1	1	1	1		1	2	1	1	2	2	1	1	1	1	1		1	1	0	1	1	1	1	0	1	1	1	1		1	1	1	1	1	1	1	1	1	1	0	1	1	1	1	rpiB; ribose 5-phosphate isomerase B [EC:5.3.1.6]
K08093	0	0	0	0	0	0		0	0	0	0	0	0	0	1	0	0	1		0	0	0	0	0	0	0	0	0	0	0	0		0	0	0	0	0	0	0	0	0	0	0	0	0	0	0	hxlA; 3-hexulose-6-phosphate synthase [EC:4.1.2.43]
K08094	0	0	0	0	0	0		0	0	0	0	0	0	0	1	0	0	1		0	0	0	0	0	0	0	0	0	0	1	0		0	0	0	0	0	0	0	0	0	0	0	0	0	0	0	hxlB; 6-phospho-3-hexuloisomerase [EC:5.3.1.27]
K01621	0	0	0	0	0	0		0	0	0	0	0	0	0	0	0	0	0		0	0	0	1	0	0	1	0	0	1	2	1		0	0	0	0	0	0	0	0	0	0	0	0	0	0	0	xfp, xpk; xylulose-5-phosphate/fructose-6-phosphate phosphoketolase [EC:4.1.2.9 4.1.2.22]
K01619	1	2	1	1	1	1		0	1	0	1	1	1	0	0	0	0	0		1	1	1	2	1	1	2	3	2	0	1	1		1	1	1	1	1	0	0	1	1	2	0	0	1	1	0	deoC, DERA; deoxyribose-phosphate aldolase [EC:4.1.2.4]
K00852	0	1	1	2	1	1		0	0	0	0	0	0	0	0	0	0	0		0	0	0	0	1	1	1	0	0	0	1	1		0	0	0	0	1	0	0	0	0	0	0	0	0	0	0	rbsK, RBKS; ribokinase [EC:2.7.1.15]
K00948	1	1	1	1	1	1		1	1	1	1	1	1	1	0	1	1	0		2	2	2	2	3	1	2	1	1	1	1	1		1	1	1	1	1	1	1	1	1	1	1	1	1	1	1	PRPS, prsA; ribose-phosphate pyrophosphokinase [EC:2.7.6.1]
K01625	1	1	0	1	1	1		0	0	0	1	1	1	0	0	1	0	1		0	0	1	1	0	1	2	1	1	1	1	1		1	1	1	0	0	1	0	0	0	1	1	1	1	0	0	eda; 2-dehydro-3-deoxyphosphogluconate aldolase / (4S)-4-hydroxy-2-oxoglutarate aldolase [EC:4.1.2.14 4.1.3.42]
K00034	0	0	0	0	0	0		0	0	0	0	0	0	0	0	0	0	0		0	0	1	0	0	0	0	0	0	0	0	0		0	0	0	0	0	0	0	0	0	0	0	0	0	0	0	gdh; glucose 1-dehydrogenase [EC:1.1.1.47]
K22969	0	0	0	1	1	1		0	0	0	0	0	0	0	0	0	0	0		0	0	0	0	0	0	0	0	0	0	0	0		0	0	0	0	0	0	0	0	0	0	0	0	0	0	0	gdh; glucose 1-dehydrogenase [EC:1.1.1.47]
K01053	3	2	3	1	3	3		0	0	0	0	0	0	0	0	0	0	0		0	1	0	2	2	1	5	1	1	1	0	0		0	0	0	0	1	0	0	0	0	0	0	0	0	0	0	E3.1.1.17, gnl, RGN; gluconolactonase [EC:3.1.1.17]
K06151	0	0	0	0	0	0		0	1	1	0	0	0	0	0	0	0	0		0	0	0	0	0	0	0	0	0	0	0	0		0	0	0	0	0	0	0	0	0	0	0	0	0	0	0	E1.1.99.3A; gluconate 2-dehydrogenase alpha chain [EC:1.1.99.3]
K06152	0	0	0	0	0	0		0	1	1	0	0	0	0	0	0	0	0		0	0	0	0	0	0	0	0	0	0	0	0		0	0	0	0	0	0	0	0	0	0	0	0	0	0	0	E1.1.99.3G; gluconate 2-dehydrogenase gamma chain [EC:1.1.99.3]
K00851	1	1	1	1	1	1		0	0	0	0	0	0	0	0	0	0	0		0	0	0	0	0	0	0	0	0	0	0	0		0	0	0	0	0	0	0	0	0	0	0	0	0	0	0	E2.7.1.12, gntK, idnK; gluconokinase [EC:2.7.1.12]
K00874	1	1	1	1	1	1		0	0	0	1	1	0	1	1	1	1	1		0	0	2	0	1	1	2	0	0	0	1	1		0	0	0	0	1	1	0	0	0	1	1	1	1	0	0	kdgK; 2-dehydro-3-deoxygluconokinase [EC:2.7.1.45]
K03738	0	0	0	0	0	0		0	0	0	0	0	0	1	2	1	1	1		2	1	3	1	0	0	0	0	0	0	0	0		0	1	1	0	0	0	0	0	0	0	0	0	0	0	0	aor; aldehyde:ferredoxin oxidoreductase [EC:1.2.7.5]
K11529	1	2	1	2	1	1		1	0	0	0	0	0	1	1	1	1	1		0	1	0	0	1	0	0	0	0	0	0	0		2	2	2	1	1	2	1	0	1	1	1	1	1	0	0	gck, gckA, GLYCTK; glycerate 2-kinase [EC:2.7.1.165]
K01051	0	1	1	1	1	1		0	0	0	0	0	0	0	0	0	0	0		0	0	0	0	0	0	0	0	0	1	1	1		0	0	0	0	0	0	0	0	0	0	0	0	0	0	0	E3.1.1.11; pectinesterase [EC:3.1.1.11]
K01728	0	0	0	0	0	0		0	0	0	0	0	0	0	0	0	0	0		0	0	0	0	0	0	0	0	0	1	0	0		0	0	0	0	0	0	0	0	0	0	0	0	0	0	0	pel; pectate lyase [EC:4.2.2.2]
K01730	0	0	0	0	0	0		0	0	0	0	0	0	0	0	0	0	0		0	0	0	0	0	1	3	0	0	0	1	2		0	0	0	0	0	0	0	0	0	0	0	0	0	0	0	ogl; oligogalacturonide lyase [EC:4.2.2.6]
K01815	1	1	1	0	1	1		0	0	0	0	0	0	0	0	0	0	0		0	0	1	0	1	0	0	0	0	0	1	1		0	0	0	0	0	0	0	0	0	0	0	0	0	0	0	kduI; 4-deoxy-L-threo-5-hexosulose-uronate ketol-isomerase [EC:5.3.1.17]
K00065	1	1	1	1	1	1		0	0	0	0	0	0	0	0	1	0	1		0	0	2	0	1	1	1	0	0	1	2	2		0	0	0	0	0	0	0	0	0	0	0	0	0	0	0	kduD; 2-dehydro-3-deoxy-D-gluconate 5-dehydrogenase [EC:1.1.1.127]
K01812	1	1	2	2	1	1		0	0	0	1	0	0	0	0	0	0	0		0	0	0	0	1	1	3	1	1	2	3	2		0	0	0	0	0	0	0	0	0	1	0	0	0	0	0	uxaC; glucuronate isomerase [EC:5.3.1.12]
K00041	0	0	0	0	0	0		0	0	0	0	0	0	0	0	0	0	0		0	0	0	0	0	0	0	0	0	0	0	0		0	0	0	0	1	0	1	0	1	1	0	0	0	0	0	uxaB; tagaturonate reductase [EC:1.1.1.58]
K01685	0	0	0	0	0	0		0	0	0	0	0	0	0	0	0	0	0		0	0	0	0	0	0	0	0	0	0	0	0		0	0	0	0	0	0	1	0	1	1	0	0	0	0	0	uxaA; altronate hydrolase [EC:4.2.1.7]
K01686	2	2	2	3	2	2		0	0	0	1	0	0	0	0	1	0	1		0	0	0	1	1	2	4	1	1	0	2	1		0	0	0	1	0	0	0	0	0	0	0	0	0	1	0	uxuA; mannonate dehydratase [EC:4.2.1.8]
K08323	0	0	0	0	0	0		0	0	0	0	0	0	0	0	0	0	0		0	0	0	1	0	0	0	1	0	1	0	0		0	0	0	0	0	0	0	0	0	0	0	0	0	0	0	rspA, manD; mannonate dehydratase [EC:4.2.1.8]
K08322	0	0	0	0	0	0		0	0	0	0	0	0	0	0	0	0	0		0	0	0	0	0	0	0	0	0	0	0	0		0	0	0	0	0	0	0	0	0	0	0	0	0	0	0	rspB; L-gulonate 5-dehydrogenase [EC:1.1.1.380]
K00040	0	0	0	0	0	0		0	0	0	0	0	0	0	0	0	0	0		0	0	0	0	0	0	0	0	0	0	0	0		0	0	0	0	1	0	0	0	0	0	0	0	0	0	0	uxuB; fructuronate reductase [EC:1.1.1.57]
K21619	0	1	1	1	1	1		0	0	0	1	0	0	0	1	1	1	0		0	0	1	1	1	1	1	1	1	0	2	1		0	0	0	1	0	0	0	0	0	0	1	0	0	1	0	uxaE; tagaturonate epimerase [EC:5.1.2.7]
K18106	0	0	0	0	0	0		0	0	0	0	0	0	0	0	0	0	0		0	0	1	0	0	0	1	0	0	0	0	0		0	0	0	0	0	0	0	1	0	0	0	0	0	1	0	GAAA; D-galacturonate reductase [EC:1.1.1.-]
K01195	0	0	0	0	0	0		0	0	0	0	0	0	0	0	1	2	1		0	0	0	0	0	0	0	0	0	0	1	1		0	0	0	0	0	0	0	0	0	0	0	0	0	0	0	uidA, GUSB; beta-glucuronidase [EC:3.2.1.31]
K16190	0	0	0	0	0	0		0	0	0	1	0	0	0	1	0	1	1		0	0	0	1	0	1	1	0	0	0	1	1		0	0	0	0	0	0	0	0	0	0	1	0	0	0	0	GLCAK; glucuronokinase [EC:2.7.1.43]
K00012	1	3	3	3	3	3		1	2	2	1	0	1	0	1	1	1	1		0	1	1	2	2	3	1	2	0	1	1	1		1	1	1	2	0	2	0	1	1	1	0	1	1	1	1	UGDH, ugd; UDPglucose 6-dehydrogenase [EC:1.1.1.22]
K00963	0	0	0	0	0	0		0	0	0	1	0	0	0	1	0	1	0		0	0	0	1	0	0	0	1	0	0	0	0		0	0	0	0	0	0	0	0	0	0	0	0	0	0	0	UGP2, galU, galF; UTP--glucose-1-phosphate uridylyltransferase [EC:2.7.7.9]
K08092	0	0	0	0	0	0		0	0	0	0	0	0	0	0	0	0	0		0	0	0	0	0	0	1	0	0	0	0	0		0	0	0	0	0	0	0	0	0	0	0	0	0	0	0	dlgD; 3-dehydro-L-gulonate 2-dehydrogenase [EC:1.1.1.130]
K03079	0	0	0	0	0	0		0	0	0	0	0	0	0	0	0	0	0		0	0	0	0	0	0	0	0	0	0	0	0		0	0	0	0	0	0	0	0	0	0	0	0	0	0	0	ulaE, sgaU, sgbU; L-ribulose-5-phosphate 3-epimerase [EC:5.1.3.22]
K03077	0	0	0	0	0	0		0	0	0	0	0	0	0	0	0	0	0		0	0	0	1	1	1	0	0	1	0	1	1		0	0	0	0	0	0	0	0	0	0	0	0	0	0	0	araD, ulaF, sgaE, sgbE; L-ribulose-5-phosphate 4-epimerase [EC:5.1.3.4]
K01804	0	0	0	0	0	0		0	0	0	0	0	0	0	0	0	0	0		1	0	0	2	0	0	1	2	0	1	1	1		0	0	0	0	0	0	0	0	0	0	0	0	0	0	0	araA; L-arabinose isomerase [EC:5.3.1.4]
K00853	0	0	0	0	0	0		0	0	0	1	0	0	0	0	0	0	0		0	1	0	2	1	1	1	0	1	1	1	0		1	1	1	0	0	0	0	0	0	0	0	0	0	0	1	araB; L-ribulokinase [EC:2.7.1.16]
K00854	1	1	1	1	1	1		0	0	0	1	1	0	0	0	1	2	1		1	0	1	1	0	1	1	1	0	0	1	1		0	0	0	0	0	0	0	0	0	0	0	0	0	0	0	xylB, XYLB; xylulokinase [EC:2.7.1.17]
K01805	1	2	1	1	1	1		0	0	0	1	1	1	1	1	1	1	0		0	0	1	1	1	1	2	1	2	2	1	1		0	0	0	0	0	0	0	0	0	0	0	0	0	0	0	xylA; xylose isomerase [EC:5.3.1.5]
K01820	0	0	0	0	0	0		0	1	1	1	0	0	1	0	1	1	1		0	0	0	0	0	0	0	0	0	0	0	0		0	0	0	0	0	0	0	0	0	0	0	0	0	0	0	rhaA; L-rhamnose isomerase / sugar isomerase [EC:5.3.1.14 5.3.1.-]
K00848	1	1	1	1	1	1		0	0	1	1	1	1	1	1	1	1	1		1	0	1	1	0	1	1	1	1	0	1	1		1	1	1	0	0	0	0	0	0	0	0	0	0	0	0	rhaB; rhamnulokinase [EC:2.7.1.5]
K01629	0	0	0	0	0	0		0	0	0	0	0	0	1	1	1	1	0		0	0	0	0	0	0	0	0	0	0	0	0		0	0	0	0	0	0	0	0	0	0	0	0	0	0	0	rhaD; rhamnulose-1-phosphate aldolase [EC:4.1.2.19]
K09988	0	1	1	1	1	1		0	0	0	0	1	1	0	0	1	0	1		0	0	0	1	0	1	1	1	1	0	1	1		0	0	0	0	0	0	0	0	0	0	0	0	0	0	0	lyxA; D-lyxose ketol-isomerase [EC:5.3.1.15]
K00078	0	1	0	0	0	0		0	0	0	0	0	0	0	0	0	0	0		0	0	0	0	0	1	0	0	0	0	0	0		0	0	0	0	0	0	0	0	0	0	0	0	0	0	0	DHDH; dihydrodiol dehydrogenase / D-xylose 1-dehydrogenase (NADP) [EC:1.3.1.20 1.1.1.179]
K14259	0	0	2	0	1	1		0	0	0	0	0	0	0	0	0	0	0		0	0	0	0	0	0	0	0	0	1	0	0		0	0	0	0	0	0	0	0	0	0	0	0	0	0	0	kdxD; 2-dehydro-3-deoxy-D-arabinonate dehydratase [EC:4.2.1.141]
K13877	0	0	1	0	1	1		0	0	0	0	0	0	0	0	0	0	0		0	0	0	0	0	0	0	0	0	0	0	0		0	0	0	0	0	0	0	0	0	0	0	0	0	0	0	aldH; 2,5-dioxopentanoate dehydrogenase [EC:1.2.1.26]
K22187	0	1	1	1	1	1		1	1	1	1	1	1	1	0	0	1	1		0	0	0	0	0	0	0	0	0	0	0	0		1	1	1	1	2	1	1	1	1	1	1	1	1	0	1	xylA; alpha-ketoglutaric semialdehyde dehydrogenase [EC:1.2.1.-]
K22935	0	0	0	0	0	0		0	0	0	0	0	0	0	1	0	1	0		0	0	0	0	0	0	0	0	0	0	0	0		0	0	0	0	0	0	0	0	0	0	0	0	0	0	0	XK1, psk; D-ribulokinase [EC:2.7.1.47]
K01218	1	0	1	1	1	1		0	0	0	0	0	0	0	0	0	0	0		0	0	1	4	2	0	0	1	2	0	0	0		0	0	0	0	0	0	0	0	0	0	0	0	0	0	0	gmuG; mannan endo-1,4-beta-mannosidase [EC:3.2.1.78]
K19355	1	2	0	0	0	0		0	0	0	0	2	2	0	0	1	0	1		0	0	1	1	2	0	0	0	0	0	0	0		0	0	0	0	0	0	0	0	0	0	0	0	0	0	0	MAN; mannan endo-1,4-beta-mannosidase [EC:3.2.1.78]
K00847	1	1	0	0	0	0		1	0	0	0	0	0	1	1	1	1	0		0	0	0	0	1	0	0	0	0	0	0	0		0	0	0	0	0	0	0	0	0	0	0	0	0	0	0	E2.7.1.4, scrK; fructokinase [EC:2.7.1.4]
K01809	0	1	1	1	1	0		0	0	0	1	0	0	0	0	0	0	0		0	0	2	1	1	1	1	1	1	0	1	1		0	0	0	0	0	0	0	0	0	0	0	0	0	0	0	manA, MPI; mannose-6-phosphate isomerase [EC:5.3.1.8]
K01840	0	0	0	0	0	0		0	0	0	0	1	1	0	0	0	0	0		0	0	0	0	0	0	0	0	0	0	0	0		0	0	0	0	0	0	0	0	0	0	0	0	0	0	0	manB; phosphomannomutase [EC:5.4.2.8]
K16881	0	0	0	0	0	0		1	0	0	1	1	1	0	0	1	1	1		0	0	0	0	0	0	0	0	0	0	0	0		1	1	1	0	0	0	0	0	0	0	0	0	0	0	0	K16881; mannose-1-phosphate guanylyltransferase / phosphomannomutase [EC:2.7.7.13 5.4.2.8]
K00971	1	1	1	1	1	1		1	1	2	1	1	1	1	1	1	1	1		1	2	1	1	1	1	2	0	1	1	1	1		1	1	1	1	0	1	1	1	1	0	1	1	1	1	1	manC, cpsB; mannose-1-phosphate guanylyltransferase [EC:2.7.7.13]
K01711	0	0	1	1	1	1		0	0	0	0	0	0	0	0	0	0	0		0	0	0	0	0	0	1	1	0	0	0	0		1	1	1	0	0	1	1	1	1	0	0	0	0	0	0	gmd, GMDS; GDPmannose 4,6-dehydratase [EC:4.2.1.47]
K02377	1	1	2	2	2	2		0	0	0	0	0	0	0	0	0	0	0		0	0	0	0	0	0	1	1	0	0	0	1		1	1	1	0	0	1	1	1	1	1	0	0	0	0	0	TSTA3, fcl; GDP-L-fucose synthase [EC:1.1.1.271]
K05305	0	0	0	0	0	0		0	0	0	0	0	0	0	0	0	0	0		0	0	0	1	0	1	1	1	1	0	1	1		0	0	0	0	0	0	0	0	0	0	0	0	0	0	0	FUK; fucokinase [EC:2.7.1.52]
K01818	1	0	0	0	0	0		0	0	0	1	0	0	1	1	1	2	1		1	0	1	1	0	1	1	1	1	1	1	3		2	1	1	0	0	0	0	0	0	0	0	0	0	0	0	fucI; L-fucose/D-arabinose isomerase [EC:5.3.1.25 5.3.1.3]
K01628	1	1	1	1	1	1		0	1	0	1	1	1	0	0	1	1	1		1	1	0	1	0	2	2	1	1	1	1	1		1	1	1	1	1	1	1	0	1	0	1	1	1	1	1	fucA; L-fuculose-phosphate aldolase [EC:4.1.2.17]
K07046	0	0	0	0	0	0		0	0	0	0	0	0	0	0	0	0	0		0	0	0	1	0	0	0	1	0	0	0	0		0	0	0	0	0	0	0	0	0	0	0	0	0	0	0	K07046; L-fuconolactonase [EC:3.1.1.-]
K01813	1	1	1	1	1	1		0	0	0	0	0	0	0	0	0	0	0		1	0	0	0	0	1	0	0	0	0	1	1		1	1	1	0	0	0	0	0	0	0	0	0	0	0	0	rhaA; L-rhamnose isomerase [EC:5.3.1.14]
K07026	0	0	0	0	0	0		0	0	0	1	1	1	0	0	0	0	0		0	0	0	0	0	0	0	0	0	0	0	0		1	1	1	0	0	0	0	0	0	0	0	0	0	0	0	E3.1.3.70; mannosyl-3-phosphoglycerate phosphatase [EC:3.1.3.70]
K00009	0	0	0	0	0	0		0	0	0	0	0	0	0	1	1	1	1		0	0	0	0	0	0	0	0	0	0	0	0		0	0	0	0	0	0	0	0	0	0	0	0	0	0	0	mtlD; mannitol-1-phosphate 5-dehydrogenase [EC:1.1.1.17]
K00846	0	0	0	0	0	0		0	0	0	1	0	0	0	1	0	1	1		1	0	0	0	0	0	0	0	0	0	0	0		0	0	0	0	0	0	0	0	0	0	0	0	0	0	0	KHK; ketohexokinase [EC:2.7.1.3]
K00882	0	0	0	0	0	0		0	0	0	1	0	0	0	0	0	0	0		0	0	0	0	0	0	0	0	0	0	0	0		0	0	0	0	0	0	0	0	0	0	0	0	0	0	0	fruK; 1-phosphofructokinase [EC:2.7.1.56]
K00066	1	1	1	1	1	1		0	1	1	0	0	0	0	0	0	0	0		0	0	0	1	1	2	1	1	1	0	1	1		0	0	0	0	0	1	0	0	1	1	0	0	0	0	0	algD; GDP-mannose 6-dehydrogenase [EC:1.1.1.132]
K01729	2	1	1	2	1	1		0	0	0	0	0	0	0	0	0	0	0		0	0	4	0	1	4	4	0	0	0	1	1		0	0	0	0	0	0	0	0	1	1	0	0	0	0	0	algL; poly(beta-D-mannuronate) lyase [EC:4.2.2.3]
K03332	0	0	0	0	0	0		0	0	0	0	0	0	0	0	0	0	0		0	0	0	1	0	0	0	0	0	0	0	0		0	0	0	0	0	0	0	0	0	0	0	0	0	0	0	fruA; fructan beta-fructosidase [EC:3.2.1.80]
K15856	0	0	0	0	0	0		0	0	0	0	0	0	0	0	0	0	0		0	0	0	0	0	0	0	0	0	0	0	0		0	0	0	0	0	0	0	0	0	0	0	0	0	0	0	rmd; GDP-4-dehydro-6-deoxy-D-mannose reductase [EC:1.1.1.281]
K02794	0	0	0	0	0	0		0	0	0	0	0	0	0	0	0	0	0		0	0	0	0	1	1	0	0	0	0	0	0		0	0	0	0	0	0	0	0	0	0	0	0	0	0	0	PTS-Man-EIIB, manX; PTS system, mannose-specific IIB component [EC:2.7.1.191]
K00849	1	1	0	0	0	0		0	0	0	0	0	0	1	1	0	1	0		0	0	0	0	1	0	2	1	1	1	2	2		0	0	0	0	0	0	0	0	0	0	0	0	0	0	0	galK; galactokinase [EC:2.7.1.6]
K00965	3	3	3	4	3	3		2	1	1	2	3	3	3	4	4	5	3		1	1	4	0	0	0	0	0	0	0	1	2		3	3	3	1	1	2	2	2	2	2	2	2	2	0	2	galT, GALT; UDPglucose--hexose-1-phosphate uridylyltransferase [EC:2.7.7.12]
K01784	2	3	4	4	3	3		3	3	2	2	2	2	0	2	3	3	3		3	1	2	3	2	2	4	4	4	2	3	3		3	3	3	2	1	2	3	3	4	3	3	3	3	3	2	galE, GALE; UDP-glucose 4-epimerase [EC:5.1.3.2]
K17716	0	0	0	0	0	0		0	0	0	0	0	0	0	0	0	0	0		0	0	0	0	0	0	0	1	0	0	0	0		0	0	0	0	0	0	0	0	0	0	0	0	0	0	0	capD; UDP-glucose 4-epimerase [EC:5.1.3.2]
K01190	1	1	1	0	1	1		1	0	0	1	0	0	0	1	0	1	0		0	0	1	2	0	2	4	5	5	3	5	6		0	0	0	0	0	0	0	0	0	0	0	0	0	0	0	lacZ; beta-galactosidase [EC:3.2.1.23]
K12308	0	0	0	0	0	0		0	0	0	0	0	0	0	0	0	0	0		0	0	1	0	0	0	0	1	0	0	0	0		0	0	0	0	0	0	0	0	0	0	0	0	0	0	0	bgaB, lacA; beta-galactosidase [EC:3.2.1.23]
K01854	0	0	0	0	0	0		0	0	0	0	0	0	0	0	0	0	0		0	0	0	0	0	2	1	0	0	0	0	0		0	0	0	0	0	1	1	1	2	2	0	1	0	1	1	glf; UDP-galactopyranose mutase [EC:5.4.99.9]
K07406	0	1	1	0	0	0		0	0	0	1	0	0	0	0	1	0	1		0	0	0	0	0	0	0	0	0	0	0	0		0	0	0	0	0	0	0	0	0	1	0	1	0	0	0	melA; alpha-galactosidase [EC:3.2.1.22]
K07407	1	2	2	2	2	2		1	0	0	4	0	0	2	2	5	4	5		1	0	0	6	1	2	1	1	3	1	7	7		0	0	0	0	0	0	0	0	0	0	0	0	0	0	0	E3.2.1.22B, galA, rafA; alpha-galactosidase [EC:3.2.1.22]
K00917	0	0	0	0	0	0		0	0	0	0	0	0	0	0	0	0	0		0	0	0	0	0	0	0	0	0	0	0	0		0	0	0	0	0	0	0	0	0	0	0	0	0	0	0	lacC; tagatose 6-phosphate kinase [EC:2.7.1.144]
K16371	0	0	0	0	0	0		0	0	0	0	0	0	0	0	0	0	0		0	0	0	0	0	0	0	0	0	0	0	0		0	0	0	0	0	0	0	0	0	0	0	0	0	0	0	gatZ-kbaZ; D-tagatose-1,6-bisphosphate aldolase subunit GatZ/KbaZ
K01193	0	0	0	0	0	0		0	0	0	0	0	0	0	0	0	0	0		0	0	0	1	0	0	0	1	0	0	0	0		0	0	0	0	0	0	0	0	0	0	0	0	0	0	0	INV, sacA; beta-fructofuranosidase [EC:3.2.1.26]
K01187	0	1	0	0	0	0		1	0	0	0	1	1	0	0	0	0	0		0	0	0	0	0	0	0	0	0	0	0	0		0	0	0	0	0	0	0	0	0	0	0	0	0	0	0	malZ; alpha-glucosidase [EC:3.2.1.20]
K10046	0	0	0	0	0	0		0	1	1	0	0	0	0	0	0	0	0		0	0	0	0	0	0	0	0	0	1	0	0		0	0	0	0	0	0	0	0	0	0	0	0	0	0	0	GME; GDP-D-mannose 3', 5'-epimerase [EC:5.1.3.18 5.1.3.-]
K13875	0	0	0	0	1	1		0	0	0	0	0	0	0	0	0	0	0		0	0	0	0	0	0	0	0	0	0	0	0		0	0	0	0	0	0	0	0	0	0	0	0	0	0	0	K13875, araC; L-arabonate dehydrase [EC:4.2.1.25]
K18983	0	0	0	0	0	0		0	0	0	0	0	0	0	0	0	0	0		0	0	0	0	0	0	0	0	0	0	0	0		0	0	0	0	0	0	0	0	0	0	0	0	0	0	0	gci; D-galactarolactone cycloisomerase [EC:5.5.1.27]
K00696	0	0	1	1	1	1		0	0	0	0	0	0	0	0	0	0	0		0	0	0	0	0	0	0	0	0	0	0	0		0	0	0	0	0	0	0	0	0	0	0	0	0	0	0	E2.4.1.14; sucrose-phosphate synthase [EC:2.4.1.14]
K00695	0	0	1	1	1	1		0	0	0	0	0	0	0	0	0	0	0		0	0	0	0	0	0	0	0	0	0	0	0		0	0	0	0	0	0	0	0	0	0	0	0	0	0	0	E2.4.1.13; sucrose synthase [EC:2.4.1.13]
K00690	0	0	0	0	0	0		0	0	0	0	0	0	0	0	0	0	0		0	0	0	0	0	0	0	0	0	0	0	0		1	1	1	0	0	0	0	0	0	0	0	0	0	0	0	E2.4.1.7; sucrose phosphorylase [EC:2.4.1.7]
K05349	2	4	1	3	3	3		0	0	0	5	1	1	0	0	0	0	1		1	1	1	5	4	0	6	5	3	0	7	5		0	0	0	0	0	0	0	0	1	0	0	0	0	0	0	bglX; beta-glucosidase [EC:3.2.1.21]
K05350	0	1	1	1	1	1		0	0	0	1	1	1	0	0	0	0	0		0	0	0	0	0	1	1	0	0	0	1	1		0	0	0	0	0	0	0	0	0	0	0	0	0	0	0	bglB; beta-glucosidase [EC:3.2.1.21]
K00694	0	0	0	0	0	0		0	0	0	0	0	0	0	0	0	0	0		0	0	0	0	0	0	0	0	0	0	0	0		0	0	0	0	0	0	0	0	0	0	0	0	0	0	0	bcsA; cellulose synthase (UDP-forming) [EC:2.4.1.12]
K01179	3	4	5	6	5	5		0	0	0	1	1	1	0	1	1	1	0		0	1	3	7	2	0	0	3	5	3	3	2		0	0	0	1	1	0	0	0	0	0	0	0	0	0	0	E3.2.1.4; endoglucanase [EC:3.2.1.4]
K00702	0	0	0	0	0	0		0	0	0	0	0	0	0	0	0	0	0		0	0	1	1	1	0	0	1	0	0	0	0		0	0	0	0	0	0	0	0	0	0	0	0	0	0	0	E2.4.1.20; cellobiose phosphorylase [EC:2.4.1.20]
K02761	0	0	0	0	0	0		0	0	0	0	0	0	0	0	0	0	0		0	0	0	0	0	0	1	0	0	0	1	1		0	0	0	0	0	0	0	0	0	0	0	0	0	0	0	PTS-Cel-EIIC, celB, chbC; PTS system, cellobiose-specific IIC component
K00978	0	0	1	0	0	0		0	2	2	0	0	0	0	0	0	0	0		0	0	1	0	0	0	1	1	2	0	0	0		1	1	1	0	0	0	0	1	1	1	0	0	0	0	0	rfbF; glucose-1-phosphate cytidylyltransferase [EC:2.7.7.33]
K00975	1	2	2	2	2	2		2	2	2	0	0	0	0	0	0	0	0		1	1	3	2	3	3	3	1	2	3	3	3		2	2	2	2	2	1	2	0	2	2	2	0	2	0	2	glgC; glucose-1-phosphate adenylyltransferase [EC:2.7.7.27]
K00703	2	2	2	2	2	2		1	1	1	1	1	1	0	1	2	1	0		1	1	1	1	1	1	1	2	1	1	1	1		1	1	1	2	2	1	1	1	2	2	1	1	2	0	1	glgA; starch synthase [EC:2.4.1.21]
K00700	0	1	1	1	1	1		0	0	0	0	0	0	0	0	0	0	0		0	0	0	1	1	0	0	1	1	0	1	1		1	1	1	0	0	0	0	0	0	0	0	0	0	0	0	GBE1, glgB; 1,4-alpha-glucan branching enzyme [EC:2.4.1.18]
K16149	0	0	0	0	0	0		0	0	0	1	1	1	0	1	1	1	1		0	0	0	0	0	0	0	0	0	0	0	0		0	0	0	0	0	0	0	0	0	0	0	0	0	0	0	K16149; 1,4-alpha-glucan branching enzyme [EC:2.4.1.18]
K00688	1	1	2	2	2	2		1	1	1	1	2	1	0	1	1	1	1		0	1	1	1	2	1	1	1	1	1	2	2		1	1	1	1	1	1	1	1	1	1	2	1	1	1	0	PYG, glgP; glycogen phosphorylase [EC:2.4.1.1]
K01200	0	0	1	1	1	1		0	0	0	0	0	0	0	0	0	0	0		0	1	0	1	1	1	1	1	0	0	2	1		0	0	0	1	1	0	0	0	0	0	0	0	0	0	0	pulA; pullulanase [EC:3.2.1.41]
K01176	0	1	1	1	1	0		0	0	0	0	0	0	0	0	0	0	0		0	0	0	1	1	0	0	0	0	0	1	1		0	0	0	0	0	0	0	0	0	0	0	0	0	0	0	AMY, amyA, malS; alpha-amylase [EC:3.2.1.1]
K05343	0	1	0	0	0	0		0	0	0	0	0	0	0	0	0	0	0		0	0	1	0	0	1	1	0	0	0	0	0		1	1	1	0	0	0	0	0	0	0	0	0	0	0	0	treS; maltose alpha-D-glucosyltransferase / alpha-amylase [EC:5.4.99.16 3.2.1.1]
K01208	2	2	2	2	3	2		1	0	0	0	0	0	0	0	1	1	0		0	1	1	1	1	1	0	0	0	0	1	1		1	1	1	0	0	0	0	0	0	0	0	0	0	0	0	cd, ma, nplT; cyclomaltodextrinase / maltogenic alpha-amylase / neopullulanase [EC:3.2.1.54 3.2.1.133 3.2.1.135]
K01178	0	0	0	0	0	0		0	0	0	0	0	0	0	0	0	0	0		0	0	0	0	0	0	0	0	0	0	0	0		0	0	0	0	0	0	1	0	1	1	1	1	0	1	0	SGA1; glucoamylase [EC:3.2.1.3]
K21574	0	0	0	0	0	0		0	0	0	0	0	0	0	0	0	0	0		0	0	0	0	1	0	0	0	0	0	0	0		0	0	0	0	0	0	0	0	0	0	0	0	0	0	0	susB; glucan 1,4-alpha-glucosidase [EC:3.2.1.3]
K05988	0	0	0	0	0	0		0	0	0	0	0	0	0	0	0	0	0		0	0	0	1	0	0	0	1	0	0	0	0		0	0	0	0	0	0	0	0	0	0	0	0	0	0	0	dexA; dextranase [EC:3.2.1.11]
K00705	1	1	2	1	1	1		0	1	1	0	0	0	0	0	0	0	0		0	0	1	1	1	0	1	0	1	0	0	0		1	1	1	0	0	0	0	0	0	0	0	0	0	0	0	malQ; 4-alpha-glucanotransferase [EC:2.4.1.25]
K22451	0	0	0	0	0	0		0	0	0	1	1	1	0	1	1	1	1		1	1	1	0	0	1	0	0	0	1	1	1		0	0	0	1	1	1	1	1	1	1	0	1	1	1	0	jgt; 4-alpha-glucanotransferase [EC:2.4.1.25]
K16147	0	0	0	0	0	0		0	0	0	0	0	0	0	0	0	0	0		0	0	0	0	0	1	1	0	0	0	0	0		1	1	1	0	0	0	0	0	0	0	0	0	0	0	0	glgE; starch synthase (maltosyl-transferring) [EC:2.4.99.16]
K01838	0	0	0	0	0	0		0	0	0	1	1	1	0	0	0	0	0		0	0	0	0	0	0	0	0	0	0	0	0		0	0	0	0	0	0	0	0	0	0	0	0	0	0	0	pgmB; beta-phosphoglucomutase [EC:5.4.2.6]
K01214	0	1	0	0	0	0		0	0	0	0	1	1	0	0	0	0	0		0	0	1	1	0	0	0	1	1	0	0	0		0	0	0	0	0	1	1	0	0	1	0	1	1	1	0	ISA, treX; isoamylase [EC:3.2.1.68]
K06044	0	1	0	0	0	0		0	0	0	0	0	0	0	0	0	0	0		0	0	1	0	0	1	1	0	0	0	0	0		1	1	1	0	0	0	0	0	0	0	0	0	0	0	0	treY, glgY; (1->4)-alpha-D-glucan 1-alpha-D-glucosylmutase [EC:5.4.99.15]
K01236	0	1	0	0	0	0		0	0	0	0	0	0	0	0	0	0	0		0	0	1	0	0	1	1	0	0	0	0	0		1	1	1	0	0	0	0	0	0	0	0	0	0	0	0	treZ, glgZ; maltooligosyltrehalose trehalohydrolase [EC:3.2.1.141]
K13057	1	1	0	0	0	0		0	0	0	1	1	1	0	0	0	0	0		1	0	2	0	0	2	2	0	0	0	0	0		3	3	3	0	0	0	0	0	0	0	0	0	0	0	0	treT; trehalose synthase [EC:2.4.1.245]
K00697	1	1	0	0	0	0		0	0	0	1	1	1	0	0	0	0	0		0	0	1	0	1	1	1	0	0	1	0	0		1	1	1	0	0	0	0	0	0	0	0	0	0	0	0	otsA; trehalose 6-phosphate synthase [EC:2.4.1.15 2.4.1.347]
K01087	1	1	0	0	0	0		0	0	0	0	0	0	0	0	0	0	0		0	0	0	0	1	1	1	0	0	1	0	0		1	1	1	0	0	0	0	0	0	0	0	0	0	0	0	otsB; trehalose 6-phosphate phosphatase [EC:3.1.3.12]
K16055	0	0	0	0	0	0		0	0	0	0	0	0	0	0	0	0	0		0	0	1	0	1	1	1	0	0	1	0	0		0	0	0	0	0	0	0	0	0	0	0	0	0	0	0	TPS; trehalose 6-phosphate synthase/phosphatase [EC:2.4.1.15 3.1.3.12]
K01194	0	2	2	3	1	1		0	0	0	0	0	0	0	0	0	0	0		0	0	0	0	1	2	1	1	1	0	2	2		0	0	0	0	0	0	0	0	0	0	0	0	0	0	0	TREH, treA, treF; alpha,alpha-trehalase [EC:3.2.1.28]
K05342	0	0	0	0	0	0		0	0	0	0	0	0	0	0	0	0	0		0	0	0	0	0	0	0	0	0	0	0	0		0	0	0	0	0	0	0	0	0	0	0	0	0	0	0	E2.4.1.64; alpha,alpha-trehalose phosphorylase [EC:2.4.1.64]
K01183	0	2	0	1	1	1		0	1	1	1	1	1	0	0	0	0	0		0	0	0	3	0	0	0	2	1	0	0	0		2	2	2	0	0	0	0	1	1	1	0	0	0	0	0	E3.2.1.14; chitinase [EC:3.2.1.14]
K01207	2	3	2	2	2	1		1	0	0	1	0	0	0	0	0	0	0		0	0	1	1	0	0	0	2	2	0	0	0		1	1	1	0	0	0	0	0	1	1	0	0	0	0	0	nagZ; beta-N-acetylhexosaminidase [EC:3.2.1.52]
K12373	0	1	0	1	0	0		2	1	0	3	1	1	0	0	1	2	0		0	0	2	5	2	2	4	2	1	0	3	5		0	0	0	1	0	0	0	0	0	0	0	0	0	0	0	HEXA_B; hexosaminidase [EC:3.2.1.52]
K15855	0	0	0	0	0	0		0	0	0	1	1	1	0	0	0	0	0		0	0	0	0	0	0	0	0	0	0	0	0		0	0	0	0	0	0	0	0	0	0	0	0	0	0	0	csxA; exo-1,4-beta-D-glucosaminidase [EC:3.2.1.165]
K18675	0	0	0	0	0	0		0	0	0	0	0	0	0	0	0	0	0		0	0	0	0	0	0	0	0	0	0	0	0		0	0	0	0	0	0	0	0	0	0	0	0	0	0	0	chbP; N,N'-diacetylchitobiose phosphorylase [EC:2.4.1.280]
K07102	1	1	1	1	1	1		0	0	0	0	0	0	0	0	0	0	0		1	0	1	1	1	1	1	1	1	0	1	1		0	0	0	1	0	2	0	0	1	1	1	1	1	0	1	amgK; N-acetylmuramate 1-kinase [EC:2.7.1.221]
K00992	0	0	0	0	0	0		0	0	0	0	0	0	0	0	0	0	0		0	0	0	0	1	0	0	0	0	0	0	0		0	0	0	0	0	0	0	0	0	0	0	0	0	0	0	murU; N-acetyl-alpha-D-muramate 1-phosphate uridylyltransferase [EC:2.7.7.99]
K07106	1	1	1	1	1	1		0	1	1	1	1	1	0	1	1	1	1		1	1	1	0	1	1	1	0	0	0	1	1		1	1	1	1	1	1	1	0	1	1	2	1	1	1	1	murQ; N-acetylmuramic acid 6-phosphate etherase [EC:4.2.1.126]
K00884	1	0	1	1	1	1		0	1	1	1	1	1	0	0	1	0	0		0	1	0	0	1	1	1	0	0	1	1	1		0	0	0	0	0	0	0	0	0	0	0	0	0	0	0	NAGK, nagK; N-acetylglucosamine kinase [EC:2.7.1.59]
K00972	0	1	1	1	1	1		0	1	1	1	1	1	1	0	1	1	1		1	1	1	0	0	1	1	0	0	0	1	1		0	0	0	1	1	1	1	0	1	0	1	1	1	1	1	UAP1; UDP-N-acetylglucosamine/UDP-N-acetylgalactosamine diphosphorylase [EC:2.7.7.23 2.7.7.83]
K04042	0	0	0	0	0	0		0	0	0	0	0	0	0	0	0	0	0		0	0	0	0	0	0	0	0	0	0	0	0		0	0	0	0	0	0	0	0	0	0	0	0	0	0	0	glmU; bifunctional UDP-N-acetylglucosamine pyrophosphorylase / Glucosamine-1-phosphate N-acetyltransferase [EC:2.7.7.23 2.3.1.157]
K01787	0	0	1	0	1	1		0	0	0	0	0	0	0	2	1	1	0		0	0	0	0	0	1	1	0	1	0	1	1		0	0	0	0	0	0	0	0	0	0	0	0	0	0	0	RENBP; N-acylglucosamine 2-epimerase [EC:5.1.3.8]
K01788	0	1	0	0	0	0		0	0	0	0	0	0	0	0	0	0	0		0	0	0	0	1	0	0	0	0	0	0	0		0	0	0	0	0	0	0	0	0	0	0	0	0	0	0	nanE; N-acylglucosamine-6-phosphate 2-epimerase [EC:5.1.3.9]
K05304	0	0	0	0	0	0		0	0	0	0	0	0	0	0	0	0	0		0	0	0	0	0	0	0	0	0	0	0	0		0	0	0	0	0	0	0	0	0	0	0	0	0	0	0	NANS, SAS; sialic acid synthase [EC:2.5.1.56 2.5.1.57 2.5.1.132]
K01654	0	1	0	0	0	0		0	0	0	0	0	0	0	0	0	0	0		0	0	0	0	0	0	0	0	0	0	0	0		0	0	0	0	0	0	0	0	0	0	0	0	0	0	0	E2.5.1.56, neuB; N-acetylneuraminate synthase [EC:2.5.1.56]
K01639	0	0	0	0	0	0		0	0	0	0	0	0	0	0	0	1	0		0	0	2	0	0	0	1	1	1	0	0	0		0	0	0	0	0	0	0	0	0	0	0	0	0	0	0	E4.1.3.3, nanA, NPL; N-acetylneuraminate lyase [EC:4.1.3.3]
K21749	0	0	0	0	0	0		0	0	0	0	0	0	0	0	0	0	0		0	0	0	0	0	0	0	0	0	0	0	0		0	0	0	0	0	1	0	0	0	0	0	0	0	0	0	CMAS; N-acylneuraminate/3-deoxy-D-glycero-D-galacto-nononate cytidylyltransferase [EC:2.7.7.43 2.7.7.92]
K01791	1	2	2	1	2	2		2	1	0	1	2	2	1	0	2	1	0		0	1	0	1	3	2	2	2	3	0	3	3		1	1	1	0	0	1	0	3	0	1	1	1	1	1	1	wecB; UDP-N-acetylglucosamine 2-epimerase (non-hydrolysing) [EC:5.1.3.14]
K13015	0	1	0	1	1	0		1	1	0	1	1	1	0	2	1	1	1		1	1	0	0	0	0	1	1	1	1	0	1		1	1	1	0	0	1	1	1	1	0	0	1	2	0	1	wbpA; UDP-N-acetyl-D-glucosamine dehydrogenase [EC:1.1.1.136]
K13016	0	0	0	0	0	0		0	0	0	0	0	0	0	0	0	0	0		0	0	0	0	1	1	1	1	1	0	1	1		0	0	0	0	0	0	0	0	0	0	0	0	0	0	0	wbpB; UDP-N-acetyl-2-amino-2-deoxyglucuronate dehydrogenase [EC:1.1.1.335]
K13017	1	1	1	1	1	1		0	1	0	1	1	1	1	1	1	1	0		0	1	0	0	0	0	0	0	0	0	0	0		1	1	1	0	0	1	0	0	0	1	1	1	1	0	0	wbpE, wlbC; UDP-2-acetamido-2-deoxy-ribo-hexuluronate aminotransferase [EC:2.6.1.98]
K13018	1	1	1	1	1	1		1	1	0	1	1	1	0	1	0	0	0		0	0	0	0	0	0	0	0	0	0	0	0		1	1	1	0	0	2	0	1	0	0	1	0	0	0	1	wbpD, wlbB; UDP-2-acetamido-3-amino-2,3-dideoxy-glucuronate N-acetyltransferase [EC:2.3.1.201]
K13019	0	0	0	0	0	0		0	0	0	1	1	1	0	0	1	0	0		0	1	0	0	1	1	1	0	0	0	1	1		0	0	0	0	0	0	0	0	0	0	0	0	0	0	0	wbpI, wlbD; UDP-GlcNAc3NAcA epimerase [EC:5.1.3.23]
K02473	0	0	0	1	1	1		0	0	0	0	0	0	0	0	0	0	0		0	0	0	0	0	0	0	1	1	0	1	1		0	0	0	0	0	0	0	0	0	0	0	0	0	0	0	wbpP; UDP-N-acetylglucosamine 4-epimerase [EC:5.1.3.7]
K00790	0	0	0	0	0	0		1	1	1	2	1	1	1	0	1	1	1		0	0	0	1	0	0	0	0	1	1	0	0		1	1	1	0	0	1	1	1	1	1	1	1	1	1	0	murA; UDP-N-acetylglucosamine 1-carboxyvinyltransferase [EC:2.5.1.7]
K00075	0	0	0	0	0	0		2	1	1	1	1	1	0	0	1	1	1		0	0	0	0	0	0	0	0	1	1	0	0		1	1	1	0	0	1	1	1	1	1	1	1	1	1	1	murB; UDP-N-acetylmuramate dehydrogenase [EC:1.3.1.98]
K15894	0	1	0	0	0	0		0	1	1	0	0	0	0	0	0	0	0		0	0	0	0	0	0	0	0	0	0	0	0		0	0	0	0	0	1	1	1	1	1	1	1	0	1	0	pseB; UDP-N-acetylglucosamine 4,6-dehydratase [EC:4.2.1.115]
K15897	0	1	0	0	0	0		0	0	0	0	0	0	0	0	0	0	0		0	0	0	0	0	0	0	0	0	0	0	0		0	0	0	0	0	0	0	0	0	0	0	0	0	0	0	pseG; UDP-2,4-diacetamido-2,4,6-trideoxy-beta-L-altropyranose hydrolase [EC:3.6.1.57]
K18429	0	0	0	0	0	0		0	0	0	0	0	0	0	0	0	0	0		0	0	0	0	0	0	0	0	0	0	0	0		0	0	0	0	0	0	0	0	0	0	0	0	0	0	0	legG, neuC2; GDP/UDP-N,N'-diacetylbacillosamine 2-epimerase (hydrolysing) [EC:3.2.1.184]
K18430	0	0	0	0	0	0		0	0	0	0	0	0	0	0	0	0	0		0	0	0	0	0	0	0	0	0	0	0	0		0	0	0	0	0	0	0	0	0	0	0	0	0	0	0	legI, neuB2; N,N'-diacetyllegionaminate synthase [EC:2.5.1.101]
K18431	0	0	0	0	0	0		0	0	0	0	0	0	0	0	0	0	0		0	0	0	0	0	0	0	0	0	0	0	0		0	0	0	0	0	0	0	0	0	0	0	0	0	0	0	legF, ptmB; CMP-N,N'-diacetyllegionaminic acid synthase [EC:2.7.7.82]
K18676	0	0	0	0	0	0		0	0	0	1	1	1	0	0	1	0	0		0	1	0	0	0	0	1	0	0	0	0	0		0	0	0	0	0	0	0	0	0	0	0	0	0	0	0	gspK; glucosamine kinase [EC:2.7.1.8]
K03431	0	0	0	0	0	0		0	0	0	0	0	0	0	0	0	0	0		0	0	0	0	0	0	0	0	0	0	0	0		0	0	0	0	0	0	0	0	0	0	0	0	0	0	0	glmM; phosphoglucosamine mutase [EC:5.4.2.10]
K01443	0	0	0	0	0	0		0	0	0	1	1	1	1	2	2	2	1		1	0	2	1	1	3	2	1	1	0	3	4		0	0	0	0	0	0	0	0	0	0	0	0	0	0	0	nagA, AMDHD2; N-acetylglucosamine-6-phosphate deacetylase [EC:3.5.1.25]
K02564	1	2	1	2	2	1		1	1	1	3	2	1	1	0	3	3	2		2	0	2	1	2	2	4	1	2	0	3	3		1	1	1	0	0	1	1	0	1	1	1	1	0	0	0	nagB, GNPDA; glucosamine-6-phosphate deaminase [EC:3.5.99.6]
K00820	1	2	2	1	1	2		1	1	1	1	1	1	1	2	0	1	1		2	1	1	1	1	1	1	1	1	1	1	1		1	1	1	1	1	1	1	0	1	0	1	1	1	1	1	glmS, GFPT; glutamine---fructose-6-phosphate transaminase (isomerizing) [EC:2.6.1.16]
K12446	1	1	1	1	1	1		0	0	0	0	0	0	0	1	1	1	1		0	0	0	1	0	1	2	1	0	0	2	2		1	1	1	0	0	1	1	1	1	1	0	1	1	1	1	E2.7.1.46; L-arabinokinase [EC:2.7.1.46]
K13379	0	0	0	0	0	0		0	0	0	0	0	0	0	0	0	0	0		0	0	0	0	0	0	0	0	0	0	0	0		1	1	1	0	0	0	0	0	0	0	0	0	0	0	0	RGP, UTM; reversibly glycosylated polypeptide / UDP-arabinopyranose mutase [EC:2.4.1.- 5.4.99.30]
K01209	1	1	1	1	1	1		0	0	0	0	0	0	0	1	1	2	0		0	0	2	3	1	1	1	4	3	2	2	1		0	0	0	0	0	0	0	0	0	0	0	0	0	0	0	abfA; alpha-L-arabinofuranosidase [EC:3.2.1.55]
K15920	0	0	0	0	0	0		0	0	0	0	0	0	0	0	0	0	1		0	0	0	0	0	0	0	0	0	0	0	0		0	0	0	0	0	0	0	0	0	0	0	0	0	0	0	XYL4; xylan 1,4-beta-xylosidase [EC:3.2.1.37]
K01198	1	0	1	1	2	2		0	0	0	0	0	0	0	0	0	0	0		0	0	0	1	2	0	0	1	2	2	1	1		0	0	0	0	0	0	0	0	0	0	0	0	0	0	0	xynB; xylan 1,4-beta-xylosidase [EC:3.2.1.37]
K22268	0	0	0	0	0	0		0	0	0	0	0	0	0	0	0	0	0		0	0	1	0	0	0	0	0	0	0	0	0		0	0	0	0	0	0	0	0	0	0	0	0	0	0	0	xylA; xylan 1,4-beta-xylosidase [EC:3.2.1.37]
K10011	0	0	0	0	0	0		0	0	0	0	0	0	0	0	0	0	0		0	0	0	0	0	0	0	0	0	0	0	0		0	0	0	0	0	0	0	1	1	0	0	0	0	0	1	arnA, pmrI; UDP-4-amino-4-deoxy-L-arabinose formyltransferase / UDP-glucuronic acid dehydrogenase (UDP-4-keto-hexauronic acid decarboxylating) [EC:2.1.2.13 1.1.1.305]
K10012	0	1	0	1	0	0		0	0	0	0	0	0	0	0	0	0	0		0	0	0	0	0	0	0	0	0	1	0	0		0	0	0	0	0	0	0	0	0	0	0	0	0	0	0	arnC, pmrF; undecaprenyl-phosphate 4-deoxy-4-formamido-L-arabinose transferase [EC:2.4.2.53]
K08678	0	1	2	0	0	1		0	0	0	0	0	0	0	0	0	0	0		0	0	0	0	0	0	1	0	0	0	0	0		0	0	0	0	0	0	0	0	0	0	0	0	0	0	0	UXS1, uxs; UDP-glucuronate decarboxylase [EC:4.1.1.35]
K12449	0	0	0	0	0	0		0	0	0	0	0	0	0	0	0	0	0		0	0	0	0	0	0	0	0	0	0	0	0		0	0	0	0	0	0	0	1	1	0	0	0	0	0	1	AXS; UDP-apiose/xylose synthase
K08679	1	1	1	1	1	1		1	1	1	1	0	1	0	1	0	0	1		1	1	1	1	1	1	1	1	1	1	1	1		1	1	1	1	0	1	1	1	1	1	1	1	1	1	0	E5.1.3.6; UDP-glucuronate 4-epimerase [EC:5.1.3.6]
K18677	0	0	0	0	0	0		0	0	0	0	0	0	0	0	0	0	0		0	0	0	0	0	0	0	0	0	0	1	1		0	0	0	0	0	0	0	0	0	0	0	0	0	0	0	GALAK; galacturonokinase [EC:2.7.1.44]
K13010	0	0	1	0	0	0		1	0	0	0	0	0	0	0	0	1	0		0	0	0	0	0	1	1	1	1	0	0	0		1	1	1	0	0	1	0	1	1	1	1	1	0	0	1	per, rfbE; perosamine synthetase [EC:2.6.1.102]
K01709	0	0	0	0	0	0		0	1	1	0	0	0	0	0	0	0	0		0	0	0	0	0	0	1	0	0	0	0	0		0	0	0	0	0	0	0	0	0	0	0	0	0	0	0	rfbG; CDP-glucose 4,6-dehydratase [EC:4.2.1.45]
K12452	0	0	0	0	0	0		0	0	0	0	0	0	0	0	0	0	0		0	0	0	0	0	0	1	0	0	0	0	0		0	0	0	0	0	0	0	0	0	0	1	0	0	0	0	ascC, ddhC, rfbH; CDP-4-dehydro-6-deoxyglucose reductase, E1 [EC:1.17.1.1]
K12454	0	0	0	0	0	0		0	0	0	0	0	0	0	0	0	0	0		0	0	0	0	0	0	0	0	0	0	0	0		1	1	1	0	0	1	1	1	1	1	0	0	0	0	0	rfbE; CDP-paratose 2-epimerase [EC:5.1.3.10]
K00656	0	0	0	0	0	0		0	0	0	0	0	0	0	0	0	0	0		0	0	0	0	0	0	0	0	0	0	0	0		0	0	0	0	0	0	0	0	0	0	0	0	0	0	0	E2.3.1.54, pflD; formate C-acetyltransferase [EC:2.3.1.54]
K04021	0	0	0	0	0	0		0	1	0	0	1	1	0	0	0	0	0		0	0	0	0	0	0	0	0	0	0	1	1		0	0	0	0	0	0	0	0	0	0	0	0	0	0	0	eutE; aldehyde dehydrogenase
K00925	0	0	0	0	0	0		0	0	0	1	1	1	0	1	1	1	1		2	1	0	1	1	2	2	1	1	2	2	2		0	0	0	1	1	0	0	0	0	0	0	0	0	0	0	ackA; acetate kinase [EC:2.7.2.1]
K00625	0	0	0	0	0	0		0	0	0	0	1	1	1	0	1	1	1		0	0	0	0	0	1	1	0	0	0	0	0		0	0	0	0	0	0	1	1	1	1	0	0	0	0	0	E2.3.1.8, pta; phosphate acetyltransferase [EC:2.3.1.8]
K15024	1	1	0	0	1	0		0	0	0	0	0	0	0	0	0	0	0		0	0	0	0	0	0	0	0	0	0	0	0		0	0	0	0	0	0	0	0	0	0	1	1	1	1	0	K15024; putative phosphotransacetylase [EC:2.3.1.8]
K04020	0	0	0	0	0	0		0	0	0	0	0	0	0	0	0	0	0		0	0	0	0	0	1	0	0	0	0	0	0		0	0	0	0	0	0	0	0	0	0	0	0	0	0	0	eutD; phosphotransacetylase
K11262	0	1	0	0	0	0		0	0	0	0	0	0	0	0	0	0	0		0	0	0	0	0	0	0	0	0	0	0	0		0	0	0	0	0	0	0	0	0	0	0	0	0	0	0	ACACA; acetyl-CoA carboxylase / biotin carboxylase 1 [EC:6.4.1.2 6.3.4.14 2.1.3.15]
K01962	1	1	1	1	1	1		1	1	1	1	1	1	1	1	1	1	1		0	1	0	1	1	1	1	1	1	1	1	1		1	1	1	1	0	1	1	1	1	1	1	1	1	1	1	accA; acetyl-CoA carboxylase carboxyl transferase subunit alpha [EC:6.4.1.2 2.1.3.15]
K02160	1	1	1	1	1	1		0	1	1	1	1	1	1	1	0	1	0		1	0	1	2	1	1	1	1	0	1	1	1		1	1	1	1	1	1	1	0	1	2	1	1	1	1	1	accB, bccP; acetyl-CoA carboxylase biotin carboxyl carrier protein
K01961	2	2	1	2	2	1		0	2	2	2	2	2	1	1	0	1	0		3	0	3	1	1	1	1	1	0	1	1	0		0	0	0	2	1	2	2	0	2	1	1	2	2	2	2	accC; acetyl-CoA carboxylase, biotin carboxylase subunit [EC:6.4.1.2 6.3.4.14]
K01963	0	1	1	1	1	1		1	1	1	1	1	1	0	1	1	1	0		1	1	1	1	1	1	1	1	1	1	1	1		1	1	1	1	1	1	1	1	1	1	1	1	1	1	1	accD; acetyl-CoA carboxylase carboxyl transferase subunit beta [EC:6.4.1.2 2.1.3.15]
K01512	1	1	1	1	1	1		1	1	1	1	1	1	0	0	2	0	1		1	0	1	1	0	1	1	1	1	1	1	1		1	1	1	0	1	1	1	1	1	1	1	1	1	0	1	acyP; acylphosphatase [EC:3.6.1.7]
K01026	0	0	0	0	0	0		0	0	0	0	0	0	0	0	0	0	0		0	0	0	0	0	0	1	0	0	0	0	0		0	0	0	0	0	0	0	0	0	0	0	0	0	0	0	pct; propionate CoA-transferase [EC:2.8.3.1]
K00158	0	0	0	0	0	0		0	0	0	0	0	0	0	0	0	0	0		0	0	0	0	0	0	0	0	0	0	0	0		0	0	0	0	1	0	0	0	0	0	0	0	0	0	0	E1.2.3.3, poxL; pyruvate oxidase [EC:1.2.3.3]
K03778	0	1	1	1	1	1		0	0	0	0	0	0	0	0	0	0	0		0	0	0	0	0	0	0	0	0	0	1	0		1	1	1	0	0	0	0	0	0	0	0	0	0	0	0	ldhA; D-lactate dehydrogenase [EC:1.1.1.28]
K23257	0	0	0	0	0	0		0	0	0	0	0	0	0	0	0	0	0		0	0	0	0	0	0	2	0	0	0	0	0		0	0	0	0	0	0	0	0	0	0	0	0	0	0	0	yvgN; methylglyoxal/glyoxal reductase [EC:1.1.1.283 1.1.1.-]
K01759	0	1	1	2	1	1		0	0	0	0	0	0	0	0	0	0	0		0	0	0	0	0	1	0	0	0	0	0	0		0	0	0	0	0	0	0	0	0	0	0	0	0	0	0	GLO1, gloA; lactoylglutathione lyase [EC:4.4.1.5]
K01069	3	3	2	3	3	3		2	3	3	1	1	1	1	1	1	1	1		1	0	1	1	2	3	4	3	1	1	1	0		3	3	3	2	2	2	2	1	3	2	4	3	2	2	1	gloB, gloC, HAGH; hydroxyacylglutathione hydrolase [EC:3.1.2.6]
K22373	0	0	0	0	0	0		1	0	0	1	1	1	0	1	1	2	0		1	0	1	2	0	1	2	0	0	0	2	2		1	1	1	1	1	1	1	1	1	1	1	1	1	1	1	larA; lactate racemase [EC:5.1.2.1]
K12972	0	0	0	0	0	0		1	0	0	0	0	0	0	0	0	0	0		0	0	0	0	0	0	0	0	0	0	0	0		0	0	0	0	0	0	0	0	0	0	0	0	0	0	0	ghrA; glyoxylate/hydroxypyruvate reductase [EC:1.1.1.79 1.1.1.81]
K00029	1	1	1	1	1	1		1	0	1	1	1	1	1	1	0	1	1		0	0	1	0	1	1	1	0	0	1	1	1		1	1	1	0	0	0	0	0	0	0	0	0	0	0	0	E1.1.1.40, maeB; malate dehydrogenase (oxaloacetate-decarboxylating)(NADP+) [EC:1.1.1.40]
K20509	0	0	0	0	0	0		0	0	0	0	0	0	0	0	0	0	0		1	0	1	0	0	0	0	0	0	0	0	0		0	0	0	0	0	0	0	0	0	0	0	0	0	0	0	madB, oadB, gcdB, mmdB; carboxybiotin decarboxylase [EC:7.2.4.1]
K01595	0	0	2	1	2	1		0	0	0	0	0	0	0	0	0	0	0		0	0	0	0	0	0	0	0	0	0	0	0		0	0	0	0	0	0	0	0	0	0	1	0	0	0	0	ppc; phosphoenolpyruvate carboxylase [EC:4.1.1.31]
K01006	1	1	3	1	1	1		2	1	1	1	1	1	0	1	1	1	0		1	1	1	0	1	1	1	2	1	1	2	1		1	1	1	0	1	1	1	2	1	2	0	1	1	1	1	ppdK; pyruvate, orthophosphate dikinase [EC:2.7.9.1]
K01007	0	0	0	0	0	0		0	0	0	0	0	0	0	0	0	0	0		0	0	0	0	0	0	1	0	0	0	0	0		0	0	0	0	0	0	0	0	0	0	0	0	0	0	0	pps, ppsA; pyruvate, water dikinase [EC:2.7.9.2]
K01638	1	0	0	0	0	0		0	1	1	0	0	0	0	0	0	0	0		0	0	0	0	0	0	0	0	0	0	0	0		0	0	0	0	1	0	1	1	1	1	2	1	1	1	1	aceB, glcB; malate synthase [EC:2.3.3.9]
K00626	3	4	4	5	4	4		3	5	3	4	4	3	1	1	1	2	1		1	1	1	0	1	0	0	0	0	0	0	0		8	9	9	4	3	2	4	3	5	3	5	6	4	4	2	E2.3.1.9, atoB; acetyl-CoA C-acetyltransferase [EC:2.3.1.9]
K01649	0	0	0	0	0	0		0	0	0	1	1	2	2	2	1	2	2		0	0	1	2	2	2	2	2	2	2	2	2		0	0	0	0	0	0	0	0	0	0	0	0	0	0	0	leuA, IMS; 2-isopropylmalate synthase [EC:2.3.3.13]
K01637	1	0	0	0	0	0		0	2	1	0	0	0	0	0	0	0	0		0	0	0	0	0	0	0	0	0	0	0	0		0	0	0	0	1	1	1	0	1	1	1	1	0	0	1	E4.1.3.1, aceA; isocitrate lyase [EC:4.1.3.1]
K05606	1	1	1	2	1	1		1	1	1	1	1	0	0	0	0	0	0		0	0	1	0	0	0	0	0	0	0	0	0		1	1	1	1	1	1	0	1	1	1	0	1	1	1	1	MCEE, epi; methylmalonyl-CoA/ethylmalonyl-CoA epimerase [EC:5.1.99.1]
K01966	1	1	1	1	1	0		0	1	1	1	1	1	0	0	0	0	0		1	0	1	0	0	0	0	0	0	0	0	0		1	1	1	1	0	1	1	0	1	0	1	1	1	1	1	PCCB, pccB; propionyl-CoA carboxylase beta chain [EC:6.4.1.3 2.1.3.15]
K01847	0	0	0	0	0	0		0	0	0	0	0	0	0	0	0	0	0		0	0	0	0	0	0	0	0	0	0	0	0		0	0	0	1	0	0	0	0	0	0	0	0	0	0	0	MUT; methylmalonyl-CoA mutase [EC:5.4.99.2]
K01849	1	1	1	1	1	1		0	1	1	1	1	1	0	0	0	0	0		0	0	2	0	0	0	0	0	0	0	0	0		1	1	1	0	0	1	1	0	1	0	0	1	1	1	1	E5.4.99.2B, mcmA2; methylmalonyl-CoA mutase, C-terminal domain [EC:5.4.99.2]
K01848	2	2	1	1	2	1		0	2	2	2	2	2	0	0	0	0	0		0	0	0	0	0	0	0	1	0	0	0	0		2	2	2	0	0	2	2	0	2	1	0	2	2	1	2	E5.4.99.2A, mcmA1; methylmalonyl-CoA mutase, N-terminal domain [EC:5.4.99.2]
K19268	0	0	0	0	0	0		0	0	0	0	0	0	0	0	0	0	0		0	0	0	1	0	0	0	0	0	0	0	0		0	0	0	0	0	0	0	0	0	0	0	0	0	0	0	glmE, mutE, mamB; methylaspartate mutase epsilon subunit [EC:5.4.99.1]
K01846	0	0	0	0	0	0		0	0	0	0	0	0	0	0	0	0	0		0	0	0	1	0	0	0	0	0	0	0	0		0	0	0	0	0	0	0	0	0	0	0	0	0	0	0	glmS, mutS, mamA; methylaspartate mutase sigma subunit [EC:5.4.99.1]
K00104	0	0	0	0	0	0		0	0	0	0	0	0	0	0	0	0	0		1	1	1	0	0	0	0	0	0	0	0	0		0	0	0	0	0	0	0	0	0	0	0	0	0	0	0	glcD; glycolate oxidase [EC:1.1.3.15]
K11472	0	0	0	0	0	0		0	0	0	0	0	0	0	0	0	0	0		0	0	0	0	0	0	0	0	0	0	0	0		0	0	0	0	0	0	0	0	0	0	0	0	0	0	0	glcE; glycolate oxidase FAD binding subunit
K11473	0	0	0	0	0	0		1	0	0	0	0	0	0	0	0	0	0		0	0	0	0	0	0	0	0	0	0	0	0		0	0	0	0	0	0	0	0	0	0	0	0	0	0	0	glcF; glycolate oxidase iron-sulfur subunit
K03781	0	0	0	0	0	0		0	0	0	0	1	1	0	0	0	0	0		0	0	0	1	0	0	0	0	2	0	0	0		0	0	0	0	0	0	0	0	0	0	0	0	0	0	0	katE, CAT, catB, srpA; catalase [EC:1.11.1.6]
K00015	0	0	0	0	0	0		0	0	0	0	0	0	0	0	0	0	0		0	0	0	0	0	0	0	0	0	0	0	0		1	1	1	0	0	0	0	0	0	0	0	0	0	0	1	gyaR, GOR1; glyoxylate reductase [EC:1.1.1.26]
K00018	0	0	0	0	0	0		0	0	0	0	0	0	0	0	0	0	0		0	0	0	0	1	1	1	1	1	0	0	0		0	0	0	0	0	0	0	0	0	0	0	0	0	0	0	hprA; glycerate dehydrogenase [EC:1.1.1.29]
K01091	3	2	3	3	3	3		1	1	1	1	2	2	1	1	0	1	1		0	0	0	2	2	1	3	1	4	0	2	1		1	1	1	1	1	1	1	0	0	1	1	1	1	1	0	gph; phosphoglycolate phosphatase [EC:3.1.3.18]
K01601	0	0	0	0	0	0		0	0	0	0	1	1	0	0	0	0	0		0	0	0	0	0	0	0	0	0	0	0	0		0	0	0	0	0	0	0	0	0	0	0	0	0	0	0	rbcL; ribulose-bisphosphate carboxylase large chain [EC:4.1.1.39]
K00830	0	0	0	0	0	0		1	1	1	0	0	0	0	0	0	0	0		0	0	0	0	0	0	0	0	0	0	0	0		0	0	0	1	0	1	1	0	1	1	1	1	0	0	0	AGXT; alanine-glyoxylate transaminase / serine-glyoxylate transaminase / serine-pyruvate transaminase [EC:2.6.1.44 2.6.1.45 2.6.1.51]
K01915	3	2	4	3	3	3		3	3	2	2	1	1	0	0	1	0	0		2	0	1	1	2	2	2	2	2	1	2	2		1	1	1	2	0	1	1	1	1	2	3	2	2	2	1	glnA, GLUL; glutamine synthetase [EC:6.3.1.2]
K00600	3	1	1	2	1	1		1	1	1	1	1	1	1	1	1	1	1		2	0	1	1	1	1	1	2	1	1	1	1		2	2	2	1	1	1	2	1	2	2	1	1	1	2	1	glyA, SHMT; glycine hydroxymethyltransferase [EC:2.1.2.1]
K00281	1	1	1	1	1	1		0	0	0	0	0	0	0	0	0	0	0		0	0	0	1	0	0	1	1	1	0	1	1		1	1	1	0	0	1	1	1	1	1	1	1	1	1	0	GLDC, gcvP; glycine dehydrogenase [EC:1.4.4.2]
K00282	0	0	0	0	0	0		0	1	1	1	1	1	1	1	1	1	1		1	1	1	0	0	1	1	0	0	0	0	0		0	0	0	0	0	0	0	0	0	0	0	0	0	0	0	gcvPA; glycine dehydrogenase subunit 1 [EC:1.4.4.2]
K00283	0	0	0	0	0	0		1	1	1	1	1	1	1	0	1	1	1		1	1	1	0	0	1	1	0	0	0	0	0		0	0	0	0	0	0	0	0	0	0	0	0	0	0	0	gcvPB; glycine dehydrogenase subunit 2 [EC:1.4.4.2]
K00605	2	2	2	2	2	2		1	1	1	1	1	1	1	1	1	1	1		0	1	1	1	1	1	1	1	1	0	1	1		0	0	0	1	2	2	2	0	2	2	1	1	1	1	1	gcvT, AMT; aminomethyltransferase [EC:2.1.2.10]
K02437	3	3	3	2	3	3		0	1	1	3	3	3	1	1	1	1	1		3	0	3	1	2	1	2	1	0	3	1	0		3	3	3	1	0	1	1	0	1	1	1	1	1	1	1	gcvH, GCSH; glycine cleavage system H protein
K01816	1	0	1	1	1	1		0	0	0	0	0	0	0	0	0	0	0		0	0	1	2	0	0	1	1	1	2	1	1		0	0	0	0	0	0	0	0	0	0	0	0	0	0	0	hyi, gip; hydroxypyruvate isomerase [EC:5.3.1.22]
K00042	0	0	0	0	0	0		1	0	0	1	1	1	0	0	0	0	0		0	0	2	0	1	1	2	1	1	1	1	1		0	0	0	0	0	0	0	0	0	0	0	0	0	0	0	garR, glxR; 2-hydroxy-3-oxopropionate reductase [EC:1.1.1.60]
K00865	0	0	0	0	0	0		0	0	0	0	0	0	0	0	0	0	0		0	0	1	2	0	1	1	1	1	0	1	1		0	0	0	0	0	0	0	0	0	0	0	0	0	0	0	glxK, garK; glycerate 2-kinase [EC:2.7.1.165]
K07246	0	0	0	0	0	0		0	0	0	0	0	0	0	0	0	0	0		0	0	0	0	0	0	1	1	0	0	0	0		0	0	0	0	0	0	0	0	0	0	0	0	0	0	0	ttuC, dmlA; tartrate dehydrogenase/decarboxylase / D-malate dehydrogenase [EC:1.1.1.93 4.1.1.73 1.1.1.83]
K18123	1	1	1	1	1	1		0	0	0	0	0	0	0	0	0	0	0		0	0	0	0	0	0	0	0	0	0	0	0		0	0	0	0	1	0	0	0	0	0	0	0	0	0	0	HOGA1; 4-hydroxy-2-oxoglutarate aldolase [EC:4.1.3.16]
K00123	0	0	0	0	0	0		0	0	0	0	0	0	0	0	0	0	0		0	0	0	0	0	0	0	0	0	0	0	0		0	0	0	0	0	0	0	0	0	0	0	0	0	0	0	fdoG, fdhF, fdwA; formate dehydrogenase major subunit [EC:1.17.1.9]
K00124	1	1	1	1	1	1		0	0	0	1	0	0	0	0	0	0	0		2	0	1	0	1	0	1	0	0	1	1	1		1	1	1	0	0	0	0	0	0	0	0	0	0	0	0	fdoH, fdsB; formate dehydrogenase iron-sulfur subunit
K00127	1	1	1	1	1	0		3	0	0	1	2	2	0	0	0	0	0		1	0	1	0	1	0	1	0	0	0	0	0		1	1	1	0	0	0	0	0	0	0	0	0	0	0	0	fdoI, fdsG; formate dehydrogenase subunit gamma
K01432	0	0	0	0	0	0		0	1	0	0	0	0	0	0	0	0	0		0	0	0	0	0	0	0	0	0	0	0	0		0	0	0	0	0	0	0	0	0	1	0	0	0	0	0	AFMID; arylformamidase [EC:3.5.1.9]
K07130	1	0	0	0	0	0		1	1	1	1	1	1	0	0	0	0	0		0	0	0	0	0	0	0	2	0	0	0	0		0	0	0	0	0	0	0	0	0	0	0	0	0	0	0	kynB; arylformamidase [EC:3.5.1.9]
K01433	0	0	0	0	0	0		0	0	0	0	0	0	1	1	1	1	1		0	0	0	0	0	0	1	0	0	0	0	0		0	0	0	0	0	0	0	0	0	0	0	0	0	0	0	purU; formyltetrahydrofolate deformylase [EC:3.5.1.10]
K01458	0	0	0	0	0	0		0	0	0	0	0	0	0	0	0	0	0		0	0	0	0	0	0	0	0	0	0	0	0		0	0	0	0	0	0	0	0	0	0	0	0	0	0	0	hutG; N-formylglutamate deformylase [EC:3.5.1.68]
K22133	0	0	0	0	0	0		0	1	1	0	0	0	0	0	0	0	0		0	0	0	0	0	0	0	0	0	0	0	0		0	0	0	0	0	0	0	2	0	0	0	0	0	0	0	AAE3; oxalate---CoA ligase [EC:6.2.1.8]
K01908	0	0	0	0	0	0		0	0	0	0	0	0	0	0	0	0	0		0	0	0	0	0	0	0	0	0	0	0	0		0	0	0	0	0	0	0	0	0	0	1	0	0	0	0	ACSS3, prpE; propionyl-CoA synthetase [EC:6.2.1.17]
K00167	0	0	0	0	0	0		0	0	0	0	0	0	0	0	0	0	0		0	0	1	0	0	0	0	0	0	0	0	0		0	0	0	0	0	0	0	0	0	0	0	0	0	0	0	BCKDHB, bkdA2; 2-oxoisovalerate dehydrogenase E1 component beta subunit [EC:1.2.4.4]
K11381	1	2	2	0	2	1		0	1	1	0	0	0	0	1	1	1	1		0	0	0	0	1	0	1	0	0	1	0	0		1	2	2	0	0	0	0	0	0	0	0	0	0	0	0	bkdA; 2-oxoisovalerate dehydrogenase E1 component [EC:1.2.4.4]
K00248	1	1	1	1	1	1		0	0	0	2	2	2	0	0	0	0	0		0	1	0	0	0	0	0	0	0	0	0	0		1	1	1	2	2	0	1	0	1	1	1	2	2	1	1	ACADS, bcd; butyryl-CoA dehydrogenase [EC:1.3.8.1]
K00232	0	0	0	0	0	0		0	0	0	0	0	0	0	0	0	0	0		0	0	0	0	0	0	0	0	0	0	0	0		0	0	0	1	1	1	0	1	0	1	2	1	1	1	0	E1.3.3.6, ACOX1, ACOX3; acyl-CoA oxidase [EC:1.3.3.6]
K19745	0	0	0	0	0	0		0	0	0	0	0	0	0	0	0	0	0		0	0	1	0	0	0	0	0	0	0	0	0		0	0	0	0	0	0	0	0	0	0	0	0	0	0	0	acuI; acrylyl-CoA reductase (NADPH) [EC:1.3.1.-]
K01692	2	1	3	3	3	2		0	2	1	4	3	2	0	0	0	0	0		0	1	1	0	0	0	0	0	0	0	0	0		1	1	1	1	1	0	2	0	2	2	1	2	2	2	0	paaF, echA; enoyl-CoA hydratase [EC:4.2.1.17]
K01782	1	1	0	0	1	1		0	1	1	0	0	0	1	1	0	1	1		0	0	0	0	0	0	0	0	0	0	0	0		1	1	1	0	0	1	1	0	1	1	0	1	1	1	1	fadJ; 3-hydroxyacyl-CoA dehydrogenase / enoyl-CoA hydratase / 3-hydroxybutyryl-CoA epimerase [EC:1.1.1.35 4.2.1.17 5.1.2.3]
K01578	0	0	0	0	0	0		0	0	0	0	0	0	0	0	0	0	0		0	0	0	1	0	0	0	1	0	0	0	0		0	0	0	0	0	0	0	0	0	0	0	0	0	0	0	MLYCD; malonyl-CoA decarboxylase [EC:4.1.1.9]
K00823	0	0	0	0	0	0		0	0	0	0	0	0	0	0	0	0	0		0	0	0	0	0	0	0	1	1	0	0	0		0	0	0	0	0	0	0	0	0	0	0	0	0	0	0	puuE; 4-aminobutyrate aminotransferase [EC:2.6.1.19]
K07250	0	0	0	1	0	0		0	0	0	0	0	0	0	0	0	0	0		0	0	0	0	0	0	0	0	0	0	0	0		0	0	0	0	0	0	0	0	0	0	0	0	0	0	0	gabT; 4-aminobutyrate aminotransferase / (S)-3-amino-2-methylpropionate transaminase / 5-aminovalerate transaminase [EC:2.6.1.19 2.6.1.22 2.6.1.48]
K00140	1	1	1	1	1	1		0	1	1	0	0	0	0	0	0	0	0		0	0	0	0	0	0	0	0	1	0	0	0		0	0	0	0	1	0	0	0	0	0	0	0	0	0	0	mmsA, iolA, ALDH6A1; malonate-semialdehyde dehydrogenase (acetylating) / methylmalonate-semialdehyde dehydrogenase [EC:1.2.1.18 1.2.1.27]
K01720	0	0	0	0	0	0		0	1	1	1	1	1	0	1	1	1	1		0	0	0	0	0	1	1	0	0	1	1	1		1	2	2	1	0	1	1	1	1	0	1	1	1	1	1	prpD; 2-methylcitrate dehydratase [EC:4.2.1.79]
K01574	0	0	0	0	0	0		0	0	0	0	0	0	0	0	0	0	0		0	0	0	0	0	0	0	0	0	0	0	0		0	0	0	0	0	0	0	0	0	0	0	0	0	0	0	adc; acetoacetate decarboxylase [EC:4.1.1.4]
K18369	0	0	1	0	1	1		0	0	0	0	0	0	0	0	0	0	0		0	0	0	0	0	0	0	0	0	0	0	0		0	0	0	0	0	0	0	0	0	0	0	0	0	0	0	adh2; alcohol dehydrogenase [EC:1.1.1.-]
K01734	1	0	0	1	1	1		0	0	0	0	1	0	0	2	0	0	0		1	0	0	0	0	0	0	0	0	1	0	0		0	0	0	0	0	0	0	0	0	0	0	0	0	0	0	mgsA; methylglyoxal synthase [EC:4.2.3.3]
K08325	0	0	0	0	0	0		0	0	0	0	0	0	0	0	0	0	0		0	0	0	1	1	0	0	1	0	0	1	1		0	0	0	0	0	0	0	0	0	0	0	0	0	0	0	yqhD; NADP-dependent alcohol dehydrogenase [EC:1.1.-.-]
K00005	0	0	0	0	0	0		0	0	0	0	0	0	0	0	0	0	0		0	0	0	0	0	0	1	0	0	0	0	0		0	0	0	0	0	0	0	0	0	0	0	0	0	0	0	gldA; glycerol dehydrogenase [EC:1.1.1.6]
K13922	0	0	0	0	0	0		0	1	0	0	1	1	0	0	0	0	0		0	0	0	0	0	0	0	0	0	0	0	0		0	0	0	0	0	0	0	0	0	0	0	0	0	0	0	pduP; propionaldehyde dehydrogenase [EC:1.2.1.87]
K00074	1	4	3	3	3	4		0	2	1	2	2	2	0	1	1	1	1		0	0	0	0	0	0	0	0	0	0	0	0		3	3	3	3	2	1	1	0	2	2	1	2	1	2	1	paaH, hbd, fadB, mmgB; 3-hydroxybutyryl-CoA dehydrogenase [EC:1.1.1.157]
K00022	1	1	1	1	1	0		0	0	0	0	0	0	0	0	0	0	0		0	0	0	0	0	0	0	0	0	0	0	0		1	1	1	1	0	0	1	0	1	0	1	1	1	1	0	HADH; 3-hydroxyacyl-CoA dehydrogenase [EC:1.1.1.35]
K01715	1	0	1	1	1	0		0	1	1	1	1	1	0	0	0	0	0		0	0	0	0	0	0	0	0	0	0	0	0		1	1	1	1	0	0	1	0	1	1	1	1	1	1	0	crt; enoyl-CoA hydratase [EC:4.2.1.17]
K00209	0	0	0	0	0	0		0	0	0	0	0	0	0	0	0	0	0		0	0	0	0	0	0	0	0	0	0	0	0		0	0	0	0	0	1	1	0	1	1	1	1	1	1	0	fabV, ter; enoyl-[acyl-carrier protein] reductase / trans-2-enoyl-CoA reductase (NAD+) [EC:1.3.1.9 1.3.1.44]
K00929	1	1	1	1	1	1		1	0	0	1	1	1	0	2	1	1	1		1	1	0	2	2	2	2	3	1	0	2	2		1	1	1	0	0	0	0	0	0	0	0	0	0	0	0	buk; butyrate kinase [EC:2.7.2.7]
K23351	0	0	0	0	0	0		0	0	0	0	0	0	0	0	0	0	0		1	0	1	0	0	0	0	0	0	0	0	0		0	0	0	0	0	0	0	0	0	0	0	0	0	0	0	gcdC, mmdC; glutaconyl-CoA/methylmalonyl-CoA decarboxylase subunit gamma
K01039	0	1	1	1	1	1		0	0	0	0	0	0	0	0	0	0	0		0	0	0	0	0	0	0	0	0	0	0	0		0	0	0	0	0	0	0	0	0	0	0	0	0	0	0	gctA; glutaconate CoA-transferase, subunit A [EC:2.8.3.12]
K01040	0	1	1	1	1	1		0	0	0	0	0	0	0	0	0	0	0		0	0	0	0	0	0	0	0	0	0	0	0		0	0	0	0	0	0	0	0	0	0	0	0	0	0	0	gctB; glutaconate CoA-transferase, subunit B [EC:2.8.3.12]
K00135	0	0	0	0	0	0		0	0	0	0	0	0	0	0	0	0	0		0	0	0	0	0	0	0	0	0	0	0	0		1	1	1	0	1	1	0	0	1	2	1	1	0	1	0	gabD; succinate-semialdehyde dehydrogenase / glutarate-semialdehyde dehydrogenase [EC:1.2.1.16 1.2.1.79 1.2.1.20]
K08324	0	0	0	0	0	0		0	0	0	0	0	0	0	0	0	0	0		0	0	0	0	0	0	0	0	0	0	0	0		0	0	0	0	1	0	0	0	0	0	0	0	0	0	0	sad; succinate-semialdehyde dehydrogenase [EC:1.2.1.16 1.2.1.24]
K00043	1	0	0	0	0	0		0	0	0	0	0	0	0	0	0	0	0		0	0	0	0	0	0	0	0	0	0	0	0		0	0	0	0	0	0	0	0	0	0	0	0	0	0	0	gbd; 4-hydroxybutyrate dehydrogenase [EC:1.1.1.61]
K18122	0	0	0	0	0	0		0	0	0	0	0	0	0	0	0	0	0		0	0	0	0	0	0	0	0	0	0	0	0		0	0	0	0	0	0	0	0	0	0	0	0	0	0	0	cat2, abfT; 4-hydroxybutyrate CoA-transferase [EC:2.8.3.-]
K14534	0	0	0	0	0	0		0	0	0	0	0	0	0	0	0	0	0		0	0	0	0	0	0	0	0	0	0	0	0		0	0	0	0	0	0	0	0	0	0	0	0	0	0	0	abfD; 4-hydroxybutyryl-CoA dehydratase / vinylacetyl-CoA-Delta-isomerase [EC:4.2.1.120 5.3.3.3]
K01641	0	0	0	0	0	0		1	0	0	1	1	0	0	0	0	0	0		0	0	1	1	0	1	1	1	1	1	0	0		1	1	1	0	0	0	0	0	0	0	0	0	0	0	0	E2.3.3.10; hydroxymethylglutaryl-CoA synthase [EC:2.3.3.10]
K01640	0	0	0	0	0	0		0	1	1	0	0	0	0	0	0	0	0		0	0	0	0	1	0	0	0	0	0	0	0		0	0	0	0	0	0	0	0	0	0	0	0	0	0	0	E4.1.3.4, HMGCL, hmgL; hydroxymethylglutaryl-CoA lyase [EC:4.1.3.4]
K01907	0	0	0	0	0	0		0	0	0	0	0	0	0	0	0	0	0		0	0	0	0	0	0	0	0	0	0	0	0		0	0	0	0	0	1	1	2	1	1	1	1	1	1	0	AACS, acsA; acetoacetyl-CoA synthetase [EC:6.2.1.16]
K01652	0	0	0	0	0	0		1	1	1	1	2	2	0	1	1	2	1		0	0	0	1	1	1	2	1	1	1	1	1		0	0	0	0	1	3	1	0	1	0	1	0	1	0	0	E2.2.1.6L, ilvB, ilvG, ilvI; acetolactate synthase I/II/III large subunit [EC:2.2.1.6]
K01653	0	0	0	0	0	0		1	0	0	1	1	1	1	1	1	1	1		0	0	0	2	1	1	1	1	1	1	1	1		0	0	0	0	0	0	0	0	0	0	0	0	0	0	0	E2.2.1.6S, ilvH, ilvN; acetolactate synthase I/III small subunit [EC:2.2.1.6]
K01575	0	0	0	0	0	0		0	1	1	0	0	0	0	0	0	0	0		0	0	0	0	0	0	0	0	0	0	0	0		0	0	0	0	0	0	0	0	0	0	0	0	0	0	0	alsD, budA, aldC; acetolactate decarboxylase [EC:4.1.1.5]
K03366	0	0	0	0	0	0		0	0	0	0	0	0	0	0	0	0	0		0	0	0	0	0	0	0	0	0	0	0	0		0	0	0	0	0	0	0	0	0	0	0	0	0	0	0	butA, budC; meso-butanediol dehydrogenase / (S,S)-butanediol dehydrogenase / diacetyl reductase [EC:1.1.1.- 1.1.1.76 1.1.1.304]
K01703	0	0	0	0	0	0		0	0	0	1	1	1	1	1	2	1	1		0	0	2	1	1	2	2	3	2	0	2	2		1	1	1	1	1	0	1	0	1	1	1	0	0	1	0	leuC, IPMI-L; 3-isopropylmalate/(R)-2-methylmalate dehydratase large subunit [EC:4.2.1.33 4.2.1.35]
K01704	0	0	1	1	1	1		0	0	0	1	1	1	1	1	2	1	1		1	0	2	1	0	2	2	3	1	0	2	2		1	1	1	0	0	0	0	0	1	0	2	1	0	1	1	leuD, IPMI-S; 3-isopropylmalate/(R)-2-methylmalate dehydratase small subunit [EC:4.2.1.33 4.2.1.35]
K00052	1	0	0	0	0	0		1	0	0	1	1	1	1	1	1	1	0		0	0	0	1	1	1	1	0	1	1	1	1		0	0	0	0	1	1	0	1	1	1	1	1	0	1	1	leuB, IMDH; 3-isopropylmalate dehydrogenase [EC:1.1.1.85]
K01114	1	0	0	0	0	0		0	0	0	0	0	0	0	0	0	0	0		0	0	0	0	0	0	0	0	0	0	0	0		0	0	0	0	0	0	0	0	0	0	0	0	0	0	0	plc; phospholipase C [EC:3.1.4.3]
K01092	1	1	1	0	1	1		1	1	1	2	2	2	1	0	1	1	0		0	0	1	1	1	1	2	1	1	1	1	2		1	1	1	1	0	1	1	0	0	1	1	1	1	1	0	E3.1.3.25, IMPA, suhB; myo-inositol-1(or 4)-monophosphatase [EC:3.1.3.25]
K01858	1	1	1	1	1	1		1	1	2	1	1	1	0	0	1	1	2		1	0	1	1	1	1	1	0	0	1	0	0		1	1	1	0	2	1	2	2	2	0	1	1	1	1	1	INO1, ISYNA1; myo-inositol-1-phosphate synthase [EC:5.5.1.4]
K01083	6	7	3	3	3	3		0	0	0	0	0	0	0	0	0	0	0		0	0	0	0	1	2	2	0	0	1	0	1		3	3	3	1	0	0	0	0	0	0	0	0	0	0	0	E3.1.3.8; 3-phytase [EC:3.1.3.8]
K07281	0	0	1	1	1	1		1	0	0	0	1	0	0	1	1	0	1		1	0	0	0	0	0	0	0	0	0	0	0		1	1	1	1	0	2	3	0	2	2	1	2	2	0	1	ipct; 1L-myo-inositol 1-phosphate cytidylyltransferase [EC:2.7.7.74]
K07291	0	0	1	1	1	1		1	0	0	0	1	0	0	1	1	0	1		1	0	0	1	0	0	0	0	0	0	0	0		1	1	1	1	0	2	3	0	2	2	1	2	2	0	1	dipps; CDP-L-myo-inositol myo-inositolphosphotransferase [EC:2.7.8.34]
K00010	1	1	1	1	1	1		0	0	0	0	0	0	1	0	0	1	1		0	0	3	1	1	0	0	0	1	0	1	0		0	0	0	0	1	0	1	0	2	1	1	1	0	1	0	iolG; myo-inositol 2-dehydrogenase / D-chiro-inositol 1-dehydrogenase [EC:1.1.1.18 1.1.1.369]
K22231	0	0	0	0	0	0		0	0	0	0	0	0	0	0	0	0	0		0	0	1	0	1	0	0	0	0	0	1	1		0	0	0	0	1	0	1	0	1	1	1	1	0	1	0	iolM; scyllo-inosose 3-dehydrogenase [EC:1.1.1.-]
K22233	0	0	0	0	0	0		0	0	0	0	0	0	0	0	0	0	0		0	0	1	0	0	0	0	0	0	0	0	0		0	0	0	0	0	0	1	0	1	1	1	0	0	1	0	iolO; 5-keto-L-gluconate epimerase [EC:5.1.-.-]
K03335	0	0	0	0	0	0		0	0	0	0	0	0	0	0	0	0	0		0	0	0	0	0	0	3	1	0	0	1	0		0	0	0	0	0	0	0	0	0	0	0	0	0	0	0	iolE; inosose dehydratase [EC:4.2.1.44]
K03337	0	0	0	0	0	0		0	0	0	0	0	0	0	0	1	1	0		0	0	0	0	0	0	1	0	0	0	0	0		0	0	0	0	0	0	0	0	0	0	0	0	0	0	0	iolB; 5-deoxy-glucuronate isomerase [EC:5.3.1.30]
K00329	0	0	0	0	0	0		0	0	0	0	0	0	0	0	0	0	0		0	0	0	0	0	0	0	1	1	0	0	0		0	0	0	0	0	0	0	0	0	0	0	0	0	0	0	E7.1.1.2; NADH dehydrogenase [EC:7.1.1.2]
K00330	1	2	2	2	2	2		1	1	1	1	2	2	0	0	0	0	0		1	0	1	0	0	0	0	0	0	1	1	0		3	3	3	1	0	3	2	2	2	1	1	1	2	0	2	nuoA; NADH-quinone oxidoreductase subunit A [EC:7.1.1.2]
K00331	1	2	2	2	2	2		1	1	1	1	2	2	0	0	0	0	0		1	0	1	0	0	0	0	0	0	1	1	0		4	3	3	2	1	2	2	3	2	2	2	2	0	1	1	nuoB; NADH-quinone oxidoreductase subunit B [EC:7.1.1.2]
K00332	0	0	0	0	0	0		1	0	0	1	1	1	0	0	0	0	0		0	0	0	0	0	0	0	0	0	0	1	1		0	0	0	1	0	0	1	1	1	1	1	1	0	0	0	nuoC; NADH-quinone oxidoreductase subunit C [EC:7.1.1.2]
K00333	2	2	2	2	2	1		0	1	1	1	2	2	0	0	0	0	0		0	0	0	0	0	0	0	0	0	1	1	1		2	1	1	0	1	2	2	2	2	1	0	2	1	0	1	nuoD; NADH-quinone oxidoreductase subunit D [EC:7.1.1.2]
K13378	1	1	1	1	1	1		0	0	0	0	0	0	0	0	0	0	0		0	0	0	0	0	0	0	0	0	1	0	0		2	1	1	0	0	1	1	1	1	0	0	1	0	0	1	nuoCD; NADH-quinone oxidoreductase subunit C/D [EC:7.1.1.2]
K00334	1	1	1	1	1	1		1	1	1	1	1	1	0	0	0	0	0		1	1	3	2	3	2	4	4	2	3	4	3		0	0	0	0	0	1	1	1	1	1	0	1	0	0	1	nuoE; NADH-quinone oxidoreductase subunit E [EC:7.1.1.2]
K00335	0	2	1	1	1	1		1	1	1	1	1	1	0	1	0	0	0		1	2	3	2	3	2	4	3	2	2	4	3		1	1	1	1	0	1	1	1	1	1	0	1	0	0	1	nuoF; NADH-quinone oxidoreductase subunit F [EC:7.1.1.2]
K00336	0	0	0	0	0	0		0	0	0	0	0	0	0	0	0	0	0		0	0	0	0	0	0	0	0	0	0	0	0		1	1	1	0	0	0	0	0	0	0	0	0	0	0	0	nuoG; NADH-quinone oxidoreductase subunit G [EC:7.1.1.2]
K00337	1	2	2	2	2	2		1	1	1	1	2	2	0	0	0	0	0		0	0	0	0	0	0	0	0	0	0	0	1		3	3	3	1	1	2	2	4	2	1	1	1	1	1	0	nuoH; NADH-quinone oxidoreductase subunit H [EC:7.1.1.2]
K00338	2	2	2	2	2	2		1	1	1	1	2	2	0	0	0	0	0		1	0	1	0	0	0	0	0	0	0	1	1		3	3	3	2	2	2	2	4	1	3	2	2	1	2	0	nuoI; NADH-quinone oxidoreductase subunit I [EC:7.1.1.2]
K00339	2	2	2	2	2	2		1	1	1	1	2	2	0	0	0	0	0		0	0	0	0	0	0	0	0	0	0	1	1		3	3	3	1	1	2	2	3	2	2	2	2	2	2	1	nuoJ; NADH-quinone oxidoreductase subunit J [EC:7.1.1.2]
K00340	2	2	2	2	2	1		1	1	1	1	2	2	0	0	0	0	0		1	1	1	0	0	0	0	0	0	0	1	1		3	3	3	1	1	2	2	3	2	2	2	2	2	2	2	nuoK; NADH-quinone oxidoreductase subunit K [EC:7.1.1.2]
K00341	0	2	1	2	2	2		1	1	1	0	2	2	0	0	0	0	0		1	1	1	0	0	0	0	0	0	0	1	1		2	2	2	1	1	2	2	3	2	2	2	2	2	1	2	nuoL; NADH-quinone oxidoreductase subunit L [EC:7.1.1.2]
K00342	0	2	2	1	2	2		1	1	1	0	2	2	0	0	0	0	0		1	1	0	0	0	0	0	0	0	0	1	1		2	2	2	0	1	2	2	2	2	0	2	2	2	2	2	nuoM; NADH-quinone oxidoreductase subunit M [EC:7.1.1.2]
K00343	2	1	1	1	2	2		0	1	1	1	2	2	0	0	0	0	0		1	1	1	0	0	0	0	0	0	0	1	1		2	2	2	1	2	2	2	2	2	2	1	2	2	2	2	nuoN; NADH-quinone oxidoreductase subunit N [EC:7.1.1.2]
K05577	0	0	0	0	0	0		0	0	0	0	0	0	0	0	0	0	0		0	0	0	0	0	0	0	0	0	0	0	0		0	0	0	0	0	0	0	0	0	0	0	0	0	0	0	ndhF; NAD(P)H-quinone oxidoreductase subunit 5 [EC:7.1.1.2]
K05586	0	1	0	0	0	0		0	0	0	0	0	0	0	0	0	0	0		0	0	0	0	0	0	0	0	0	0	0	0		0	0	0	0	0	0	0	0	0	0	0	0	0	0	0	hoxE; bidirectional [NiFe] hydrogenase diaphorase subunit [EC:7.1.1.2]
K05587	0	1	0	0	0	0		0	0	0	0	0	0	0	0	0	0	0		0	0	0	0	0	0	0	0	0	0	0	0		0	0	0	0	0	0	0	0	0	0	0	0	0	0	0	hoxF; bidirectional [NiFe] hydrogenase diaphorase subunit [EC:7.1.1.2]
K05588	0	1	0	0	0	0		0	0	0	0	0	0	0	0	0	0	0		0	0	0	0	0	0	0	0	0	0	0	0		0	0	0	0	0	0	0	0	0	0	0	0	0	0	0	hoxU; bidirectional [NiFe] hydrogenase diaphorase subunit [EC:7.1.1.2]
K00356	0	0	0	0	0	0		0	0	0	0	0	0	0	0	0	0	0		0	0	0	0	0	0	0	1	1	0	0	0		0	0	0	0	0	0	0	0	0	0	0	0	0	0	0	E1.6.99.3; NADH dehydrogenase [EC:1.6.99.3]
K03885	1	1	1	1	1	1		0	1	1	0	0	0	0	0	0	0	0		0	0	1	0	0	0	1	0	0	0	0	0		0	0	0	0	0	0	0	0	0	0	0	1	0	0	0	ndh; NADH dehydrogenase [EC:1.6.99.3]
K00412	1	2	1	2	1	1		1	0	0	0	0	0	0	0	0	0	0		0	0	0	0	0	0	0	0	0	0	0	0		3	3	3	0	0	0	0	0	1	1	1	1	1	1	0	CYTB, petB; ubiquinol-cytochrome c reductase cytochrome b subunit
K03886	0	0	0	0	0	0		0	0	0	0	0	0	0	0	0	0	0		0	0	0	0	0	0	0	0	0	0	0	0		1	1	1	0	0	0	0	0	1	1	1	1	1	1	0	MQCRA, qcrA, bfcA, petC; menaquinol-cytochrome c reductase iron-sulfur subunit [EC:1.10.2.-]
K02257	0	1	1	1	1	1		0	1	1	0	0	0	0	0	0	0	0		0	0	0	0	0	0	1	1	0	0	0	0		1	1	1	1	1	1	1	1	1	1	1	1	1	0	0	COX10, ctaB, cyoE; heme o synthase [EC:2.5.1.141]
K02277	2	2	2	2	2	2		1	2	1	0	0	0	0	0	0	0	0		0	0	0	0	0	0	1	1	0	1	0	0		2	2	2	1	1	2	2	0	2	2	2	2	0	0	0	coxD, ctaF; cytochrome c oxidase subunit IV [EC:1.9.3.1]
K02276	2	2	3	3	3	2		0	1	0	0	0	0	0	0	0	0	0		0	0	0	0	0	0	1	1	0	1	0	0		2	2	2	1	1	2	2	0	2	2	2	2	0	0	0	coxC, ctaE; cytochrome c oxidase subunit III [EC:1.9.3.1]
K02274	0	1	0	1	1	1		0	0	0	0	0	0	0	0	0	0	0		0	0	0	0	0	0	0	0	0	0	0	0		1	1	1	0	1	1	1	0	1	0	1	1	0	0	0	coxA, ctaD; cytochrome c oxidase subunit I [EC:1.9.3.1]
K02275	2	1	2	1	2	2		1	1	1	0	0	0	0	0	0	0	0		0	0	0	0	0	0	1	1	0	1	0	0		1	1	1	0	1	1	2	0	2	0	2	1	1	0	0	coxB, ctaC; cytochrome c oxidase subunit II [EC:1.9.3.1]
K02259	1	1	1	1	1	1		0	1	0	0	0	0	0	0	0	0	0		0	0	0	0	0	0	1	1	0	1	0	0		1	1	1	1	1	1	1	0	1	1	2	1	1	0	0	COX15, ctaA; cytochrome c oxidase assembly protein subunit 15
K00406	0	0	0	0	0	0		0	0	0	0	0	0	0	0	0	0	0		0	0	0	0	0	0	0	0	0	0	0	0		1	1	1	0	0	0	0	0	0	0	0	0	0	0	0	ccoP; cytochrome c oxidase cbb3-type subunit III
K00425	1	2	3	1	1	2		1	1	1	1	0	0	0	0	0	0	0		1	0	2	1	1	1	1	1	0	1	1	1		2	2	2	0	0	0	0	0	0	0	0	0	0	0	0	cydA; cytochrome bd ubiquinol oxidase subunit I [EC:7.1.1.7]
K00426	1	1	1	1	1	1		0	0	0	1	0	0	0	0	0	0	0		1	0	1	1	1	1	1	1	0	0	1	1		1	1	1	0	0	0	0	0	0	0	0	0	0	0	0	cydB; cytochrome bd ubiquinol oxidase subunit II [EC:7.1.1.7]
K02111	0	1	1	1	1	1		1	1	1	1	1	1	0	0	0	0	0		1	1	0	1	1	2	2	1	0	1	1	1		1	1	1	0	1	1	1	0	1	1	1	1	1	0	1	ATPF1A, atpA; F-type H+/Na+-transporting ATPase subunit alpha [EC:7.1.2.2 7.2.2.1]
K02112	0	1	1	0	1	1		1	1	1	1	1	1	0	0	0	0	0		0	1	1	1	1	2	2	1	0	1	1	0		1	1	1	0	1	1	1	0	1	1	1	1	1	0	0	ATPF1B, atpD; F-type H+/Na+-transporting ATPase subunit beta [EC:7.1.2.2 7.2.2.1]
K02115	0	1	1	1	1	0		0	1	1	1	1	1	0	0	0	0	0		1	1	0	1	1	1	1	1	0	1	1	1		1	1	1	0	1	1	1	0	1	1	1	1	1	0	1	ATPF1G, atpG; F-type H+-transporting ATPase subunit gamma
K02113	1	1	1	1	1	1		1	1	1	1	1	1	0	0	0	0	0		1	1	0	1	1	1	1	1	0	1	1	1		1	1	1	1	1	1	0	0	1	1	1	1	1	1	1	ATPF1D, atpH; F-type H+-transporting ATPase subunit delta
K02114	1	1	1	1	1	1		1	1	1	1	1	1	0	0	0	0	0		0	1	0	1	1	1	1	0	0	1	1	1		1	1	1	0	1	1	1	0	1	1	1	1	1	0	0	ATPF1E, atpC; F-type H+-transporting ATPase subunit epsilon
K02108	1	1	1	1	1	1		1	1	1	1	1	1	0	0	0	0	0		1	0	1	1	1	2	2	1	0	1	1	1		1	1	1	1	1	1	0	0	1	0	1	1	1	1	1	ATPF0A, atpB; F-type H+-transporting ATPase subunit a
K02109	1	1	1	1	1	1		1	1	1	1	1	1	0	0	0	0	0		1	0	1	1	1	2	2	1	0	1	1	1		1	1	1	1	1	1	0	0	1	1	1	1	1	1	1	ATPF0B, atpF; F-type H+-transporting ATPase subunit b
K02110	1	1	1	1	1	1		0	1	1	1	1	1	0	0	0	0	0		1	0	1	1	0	1	1	0	0	1	1	1		1	1	1	1	1	1	0	0	1	1	1	1	1	1	1	ATPF0C, atpE; F-type H+-transporting ATPase subunit c
K02117	0	0	0	0	0	0		0	0	0	0	0	0	0	0	0	0	0		0	0	0	0	0	0	0	0	1	0	0	0		0	0	0	0	0	0	0	0	0	0	0	0	0	0	0	ATPVA, ntpA, atpA; V/A-type H+/Na+-transporting ATPase subunit A [EC:7.1.2.2 7.2.2.1]
K02118	0	0	0	0	0	0		0	0	0	0	0	0	0	1	1	1	0		0	0	0	0	0	0	0	0	0	0	0	0		0	0	0	0	0	0	0	0	0	0	0	0	0	0	0	ATPVB, ntpB, atpB; V/A-type H+/Na+-transporting ATPase subunit B
K02119	0	0	0	0	0	0		0	0	0	0	0	0	0	1	1	1	0		0	0	0	0	0	0	0	0	1	0	0	0		0	0	0	0	0	0	0	0	0	0	0	0	0	0	0	ATPVC, ntpC, atpC; V/A-type H+/Na+-transporting ATPase subunit C
K02120	0	0	0	0	0	0		0	0	0	0	0	0	0	1	1	1	1		0	0	0	0	0	0	0	0	1	0	0	0		0	0	0	0	0	0	0	0	0	0	0	0	0	0	0	ATPVD, ntpD, atpD; V/A-type H+/Na+-transporting ATPase subunit D
K02121	0	0	0	0	0	0		0	0	0	0	0	0	0	1	0	2	1		1	1	0	1	0	1	1	0	0	0	0	0		0	0	0	0	0	0	0	0	0	0	0	0	0	0	0	ATPVE, ntpE, atpE; V/A-type H+/Na+-transporting ATPase subunit E
K02122	0	0	0	0	0	0		0	0	0	0	0	0	0	0	0	1	0		0	0	0	1	0	0	0	0	1	0	0	0		0	0	0	0	0	0	0	0	0	0	0	0	0	0	0	ATPVF, ntpF, atpF; V/A-type H+/Na+-transporting ATPase subunit F
K02107	0	0	0	0	0	0		0	0	0	0	0	0	0	1	0	1	0		0	0	0	0	0	0	0	0	0	0	0	0		0	0	0	0	0	0	0	0	0	0	0	0	0	0	0	ATPVG, ahaH, atpH; V/A-type H+/Na+-transporting ATPase subunit G/H
K02123	0	0	0	0	0	0		0	0	0	0	0	0	0	1	1	2	1		0	1	1	1	0	1	1	0	1	0	0	0		0	0	0	0	0	0	0	0	0	0	0	0	0	0	0	ATPVI, ntpI, atpI; V/A-type H+/Na+-transporting ATPase subunit I
K02124	0	0	0	0	0	0		0	0	0	0	0	0	0	1	2	3	1		0	1	1	1	0	1	1	0	1	0	0	0		0	0	0	0	0	0	0	0	0	0	0	0	0	0	0	ATPVK, ntpK, atpK; V/A-type H+/Na+-transporting ATPase subunit K
K02146	0	1	1	1	1	1		0	1	2	1	1	1	0	0	0	0	0		0	1	1	3	2	1	2	2	1	0	2	2		0	0	0	0	0	1	0	1	2	2	1	2	2	1	0	ATPeV0D, ATP6D; V-type H+-transporting ATPase subunit d
K01535	0	0	0	0	0	0		0	0	0	0	1	1	0	0	0	0	0		0	0	0	0	0	0	0	0	0	0	0	0		0	0	0	0	0	0	0	0	0	0	0	0	0	0	0	PMA1, PMA2; H+-transporting ATPase [EC:7.1.2.1]
K01507	1	1	1	1	1	1		0	0	1	1	1	1	0	0	0	0	0		0	0	0	0	0	0	1	0	0	1	0	0		1	1	1	0	0	0	0	0	0	0	0	0	0	0	0	ppa; inorganic pyrophosphatase [EC:3.6.1.1]
K06019	0	0	0	0	0	0		0	0	0	0	0	0	0	0	0	0	0		0	0	0	0	0	0	0	0	1	0	0	0		0	0	0	0	0	0	0	0	0	0	0	0	0	0	0	ppaX; pyrophosphatase PpaX [EC:3.6.1.1]
K00937	2	1	1	2	1	1		0	0	0	0	0	0	0	0	0	0	0		0	0	1	0	0	1	1	0	0	0	1	0		1	3	3	1	1	0	0	0	1	1	1	0	1	0	0	ppk; polyphosphate kinase [EC:2.7.4.1]
K22468	1	1	1	0	1	1		0	0	0	0	0	0	0	0	0	0	0		0	0	1	1	1	1	1	2	3	1	1	1		0	0	0	0	1	0	0	0	2	1	0	0	1	0	0	ppk2; polyphosphate kinase [EC:2.7.4.1]
K02635	1	1	0	1	0	0		0	0	0	0	0	0	0	0	0	0	0		0	0	0	0	0	0	0	0	0	0	0	0		1	1	1	0	0	0	0	0	0	0	0	0	0	0	0	petB; cytochrome b6
K02636	0	1	1	1	1	1		0	0	0	0	0	0	0	0	0	0	0		0	0	0	0	0	0	0	0	0	0	0	0		1	1	1	1	1	1	0	0	1	1	1	0	1	0	1	petC; cytochrome b6-f complex iron-sulfur subunit [EC:7.1.1.6]
K02639	0	0	0	0	0	0		0	0	0	0	0	0	0	0	0	0	0		0	0	0	0	0	0	0	0	0	0	0	0		1	1	1	0	0	0	0	0	0	0	0	0	0	0	0	petF; ferredoxin
K02288	0	0	0	0	0	0		0	0	0	0	0	0	0	0	0	0	0		0	0	0	0	0	0	0	0	0	0	0	0		0	0	0	0	0	2	0	0	0	0	0	1	1	1	0	cpcE; phycocyanobilin lyase subunit alpha [EC:4.4.1.32]
K02289	0	0	0	0	0	0		0	0	0	0	0	0	0	0	0	0	0		0	0	1	0	0	0	0	0	0	0	0	0		0	0	0	0	0	2	0	0	0	0	0	1	1	1	0	cpcF; phycocyanobilin lyase subunit beta [EC:4.4.1.32]
K11214	0	0	0	0	0	0		0	0	0	0	0	0	0	0	0	0	0		0	0	0	0	0	0	0	0	0	0	1	1		0	0	0	0	0	0	0	0	0	0	0	0	0	0	0	SHPK; sedoheptulokinase [EC:2.7.1.14]
K00814	0	0	0	0	0	0		0	0	0	0	0	0	0	0	0	0	0		0	0	0	0	1	0	1	0	0	0	0	0		0	0	0	0	0	0	0	0	0	0	0	0	0	0	0	GPT, ALT; alanine transaminase [EC:2.6.1.2]
K01938	0	1	1	1	1	1		0	0	0	0	0	0	0	0	0	0	0		0	0	0	1	1	0	0	0	0	0	1	1		0	0	0	0	0	0	0	0	0	0	0	0	0	0	0	fhs; formate--tetrahydrofolate ligase [EC:6.3.4.3]
K01491	1	1	1	1	1	1		0	1	1	1	0	1	1	1	1	1	1		0	1	0	1	0	1	1	1	1	1	2	1		0	0	0	1	0	1	1	0	1	1	1	1	1	0	1	folD; methylenetetrahydrofolate dehydrogenase (NADP+) / methenyltetrahydrofolate cyclohydrolase [EC:1.5.1.5 3.5.4.9]
K00297	1	2	2	2	2	2		1	2	1	1	1	1	1	0	1	2	1		1	1	0	1	2	0	1	2	1	2	2	2		1	1	1	0	1	2	1	1	0	0	1	1	1	1	0	metF, MTHFR; methylenetetrahydrofolate reductase (NADPH) [EC:1.5.1.20]
K00198	0	0	0	0	0	0		0	0	0	0	1	1	0	0	0	0	0		0	0	0	0	0	1	0	0	0	0	1	0		0	0	0	0	0	0	0	0	0	0	0	0	0	0	0	cooS, acsA; anaerobic carbon-monoxide dehydrogenase catalytic subunit [EC:1.2.7.4]
K00196	0	0	0	0	0	0		0	0	0	0	0	1	1	1	0	1	1		0	0	0	0	0	0	0	0	0	0	0	0		0	0	0	0	0	0	0	0	0	0	0	0	0	0	0	cooF; anaerobic carbon-monoxide dehydrogenase iron sulfur subunit
K14138	0	0	0	0	0	0		0	0	0	0	0	0	0	0	0	0	0		0	0	0	0	0	1	0	0	0	0	1	0		0	0	0	0	0	0	0	0	0	0	0	0	0	0	0	acsB; acetyl-CoA synthase [EC:2.3.1.169]
K00197	0	0	0	0	0	0		0	0	0	0	0	0	0	0	0	0	0		0	0	0	0	0	1	0	0	0	1	1	0		1	1	1	0	0	0	0	0	0	0	0	0	0	0	0	cdhE, acsC; acetyl-CoA decarbonylase/synthase, CODH/ACS complex subunit gamma [EC:2.1.1.245]
K00194	0	0	0	0	0	0		0	0	0	0	0	0	0	0	0	0	0		0	0	0	0	0	1	0	0	0	0	1	0		0	0	0	0	0	0	0	0	0	0	0	0	0	0	0	cdhD, acsD; acetyl-CoA decarbonylase/synthase, CODH/ACS complex subunit delta [EC:2.1.1.245]
K16255	0	0	0	0	0	0		0	0	0	0	0	0	0	0	0	0	0		0	0	0	0	0	0	0	0	0	0	0	0		0	0	0	0	0	0	0	0	0	0	0	0	0	0	0	mxaG; cytochrome c-L
K00148	0	0	0	0	0	0		0	0	0	0	0	0	0	0	0	0	0		0	0	0	0	0	0	0	0	0	0	0	0		0	0	0	0	1	0	0	0	0	0	0	0	0	0	0	fdhA; glutathione-independent formaldehyde dehydrogenase [EC:1.2.1.46]
K01070	0	0	0	0	0	0		0	0	0	1	1	0	0	0	0	0	0		0	0	0	1	0	0	0	0	0	0	1	1		0	0	0	0	0	0	0	0	0	0	0	0	0	0	0	frmB, ESD, fghA; S-formylglutathione hydrolase [EC:3.1.2.12]
K00125	0	0	0	0	0	0		0	0	0	0	0	0	0	0	0	0	0		0	0	0	0	0	0	0	0	0	0	0	0		0	0	0	0	0	0	0	0	0	0	0	0	0	0	0	fdhB; formate dehydrogenase (coenzyme F420) beta subunit [EC:1.17.98.3 1.8.98.6]
K11261	0	0	0	0	0	0		0	0	0	0	0	0	1	2	1	2	3		1	0	0	0	0	0	0	0	0	0	0	2		0	0	0	0	0	0	0	0	0	0	0	0	0	0	0	fwdE, fmdE; formylmethanofuran dehydrogenase subunit E [EC:1.2.7.12]
K00441	0	0	0	0	0	0		1	0	0	0	0	0	0	2	1	0	0		0	0	0	1	1	1	1	1	0	1	0	0		1	1	1	1	0	1	1	2	1	0	0	1	0	0	1	frhB; coenzyme F420 hydrogenase subunit beta [EC:1.12.98.1]
K00442	0	0	0	0	0	0		0	0	0	0	0	0	0	0	0	0	0		0	0	0	0	0	0	0	0	0	0	0	0		0	0	0	0	0	0	0	0	0	0	0	0	0	0	0	frhD; coenzyme F420 hydrogenase subunit delta
K00577	0	0	0	0	0	0		0	0	0	0	1	1	0	0	0	0	0		0	0	0	0	0	0	0	0	0	0	0	0		2	2	2	0	0	0	0	0	0	0	0	0	0	0	0	mtrA; tetrahydromethanopterin S-methyltransferase subunit A [EC:2.1.1.86]
K03388	0	0	0	0	0	0		0	0	0	0	0	0	1	1	1	3	2		1	0	1	0	0	0	0	0	0	0	1	1		0	0	0	0	0	0	0	0	0	0	0	0	0	0	0	hdrA2; heterodisulfide reductase subunit A2 [EC:1.8.7.3 1.8.98.4 1.8.98.5 1.8.98.6]
K03389	0	0	0	0	0	0		2	0	0	0	0	0	1	2	2	2	1		0	0	0	0	0	0	0	0	0	1	1	0		0	0	0	0	0	0	0	0	0	0	0	0	0	0	0	hdrB2; heterodisulfide reductase subunit B2 [EC:1.8.7.3 1.8.98.4 1.8.98.5 1.8.98.6]
K03390	0	0	0	0	0	0		2	0	0	0	0	0	1	1	1	1	1		1	0	0	0	0	0	0	1	0	1	1	1		0	0	0	0	0	0	0	0	0	0	0	0	0	0	0	hdrC2; heterodisulfide reductase subunit C2 [EC:1.8.7.3 1.8.98.4 1.8.98.5 1.8.98.6]
K08264	0	0	0	0	0	0		0	0	0	0	0	0	0	0	0	0	0		0	0	0	0	0	0	0	0	0	0	0	0		0	0	0	0	0	0	0	0	0	0	0	0	0	0	0	hdrD; heterodisulfide reductase subunit D [EC:1.8.98.1]
K14127	0	0	0	0	0	0		0	0	0	0	0	0	1	1	2	2	2		0	0	0	0	0	0	0	0	0	1	0	0		0	0	0	0	0	0	0	0	0	0	0	0	0	0	0	mvhD, vhuD, vhcD; F420-non-reducing hydrogenase iron-sulfur subunit [EC:1.12.99.- 1.8.98.5 1.8.98.6]
K14126	0	0	0	0	0	0		1	0	0	0	0	0	0	1	0	1	1		0	0	0	0	0	0	0	0	0	1	0	0		0	0	0	0	0	0	0	0	0	0	0	0	0	0	0	mvhA, vhuA, vhcA; F420-non-reducing hydrogenase large subunit [EC:1.12.99.- 1.8.98.5]
K14128	0	0	0	0	0	0		0	0	0	0	0	0	0	1	1	1	1		0	0	0	0	0	0	0	0	0	1	0	0		0	0	0	0	0	0	0	0	0	0	0	0	0	0	0	mvhG, vhuG, vhcG; F420-non-reducing hydrogenase small subunit [EC:1.12.99.- 1.8.98.5]
K00058	1	2	4	4	4	4		0	1	1	1	1	1	0	1	1	1	1		0	0	3	1	2	1	2	0	2	2	2	2		2	2	2	1	0	1	2	0	2	0	2	2	1	2	2	serA, PHGDH; D-3-phosphoglycerate dehydrogenase / 2-oxoglutarate reductase [EC:1.1.1.95 1.1.1.399]
K00831	0	0	0	0	0	0		0	0	0	0	0	0	0	1	1	2	1		0	0	1	1	1	1	1	0	1	0	1	1		0	0	0	0	0	0	0	0	0	0	0	0	0	0	0	serC, PSAT1; phosphoserine aminotransferase [EC:2.6.1.52]
K01079	0	0	0	0	0	0		0	1	1	0	0	0	0	0	0	0	0		0	0	0	0	1	0	0	0	0	0	0	0		1	1	1	1	1	1	0	0	0	1	1	2	1	1	1	serB, PSPH; phosphoserine phosphatase [EC:3.1.3.3]
K02203	0	0	0	0	0	0		0	0	0	0	0	0	0	0	0	0	0		0	0	0	1	0	0	0	1	0	1	0	0		1	1	1	0	0	0	0	0	0	0	0	0	0	0	0	thrH; phosphoserine / homoserine phosphotransferase [EC:3.1.3.3 2.7.1.39]
K14083	0	0	0	0	0	0		1	0	0	0	0	0	0	0	0	0	0		1	1	0	1	0	0	0	1	1	0	1	1		0	0	0	0	0	0	0	0	0	0	0	0	0	0	0	mttB; trimethylamine---corrinoid protein Co-methyltransferase [EC:2.1.1.250]
K16176	0	0	0	0	0	0		0	0	0	0	0	0	0	0	0	0	0		0	0	0	0	0	0	0	0	0	0	0	0		0	0	0	0	0	0	0	0	0	0	0	0	0	0	0	mtmB; methylamine---corrinoid protein Co-methyltransferase [EC:2.1.1.248]
K08097	0	0	0	0	0	0		0	0	0	0	0	0	0	0	0	0	0		0	0	0	0	0	0	0	0	0	0	0	0		1	1	1	0	1	0	0	0	0	0	0	0	0	0	0	comA; phosphosulfolactate synthase [EC:4.4.1.19]
K05979	0	0	0	0	0	0		0	0	0	1	1	1	1	1	1	1	1		0	1	0	1	1	1	1	1	1	1	1	1		0	0	0	0	0	0	0	0	0	0	0	0	0	0	0	comB; 2-phosphosulfolactate phosphatase [EC:3.1.3.71]
K19793	0	0	0	0	0	0		1	0	0	1	1	1	0	0	0	0	0		1	0	0	0	0	0	0	1	1	0	0	0		0	0	0	0	0	0	0	0	0	0	0	0	0	0	0	mfnC; (5-formylfuran-3-yl)methyl phosphate transaminase [EC:2.6.1.108]
K02575	0	0	0	0	0	0		0	0	0	0	0	0	0	0	0	0	0		0	0	0	0	0	0	0	0	0	1	0	0		0	0	0	0	0	0	0	0	0	0	0	0	0	0	0	NRT, narK, nrtP, nasA; MFS transporter, NNP family, nitrate/nitrite transporter
K00370	1	0	1	1	1	1		2	0	0	0	0	0	0	0	0	0	0		0	0	0	0	0	0	0	0	0	0	0	0		0	0	0	0	0	0	0	0	0	0	0	0	0	0	0	narG, narZ, nxrA; nitrate reductase / nitrite oxidoreductase, alpha subunit [EC:1.7.5.1 1.7.99.-]
K00371	1	1	1	1	1	1		1	0	0	0	0	0	0	0	0	0	0		0	0	0	0	0	0	0	0	0	0	0	0		0	1	1	0	0	0	0	0	0	0	0	0	0	0	0	narH, narY, nxrB; nitrate reductase / nitrite oxidoreductase, beta subunit [EC:1.7.5.1 1.7.99.-]
K00374	0	0	0	0	0	0		0	0	0	0	0	0	0	0	0	0	0		0	0	1	0	0	0	0	0	0	0	0	0		0	0	0	0	0	0	0	0	0	0	0	0	0	0	0	narI, narV; nitrate reductase gamma subunit [EC:1.7.5.1 1.7.99.-]
K02567	2	0	0	0	0	0		1	0	0	1	0	0	0	0	0	0	0		1	0	0	0	0	0	0	0	0	0	0	0		1	1	1	0	0	0	0	0	0	0	0	0	0	0	0	napA; periplasmic nitrate reductase NapA [EC:1.7.99.-]
K02568	1	0	0	0	0	0		0	0	0	0	0	0	0	0	0	0	0		0	0	0	0	0	0	0	0	0	0	0	0		1	1	1	0	0	0	0	0	0	0	0	0	0	0	0	napB; cytochrome c-type protein NapB
K03385	0	1	1	1	1	1		0	0	0	0	0	0	0	0	0	0	0		0	0	0	0	1	0	1	0	0	0	0	1		0	0	0	0	0	0	0	0	0	0	0	0	0	0	0	nrfA; nitrite reductase (cytochrome c-552) [EC:1.7.2.2]
K15876	0	1	1	1	1	1		0	0	0	0	0	0	0	0	0	0	0		0	0	0	0	1	0	1	0	0	0	0	1		0	0	0	0	0	0	0	0	0	0	0	0	0	0	0	nrfH; cytochrome c nitrite reductase small subunit
K00368	0	0	0	0	0	0		0	0	1	0	0	0	0	0	0	0	0		0	0	0	0	0	0	0	0	0	0	0	0		0	0	0	0	0	0	0	1	0	0	0	0	0	0	0	nirK; nitrite reductase (NO-forming) [EC:1.7.2.1]
K04561	0	0	0	0	0	0		0	0	0	1	0	0	0	0	0	0	0		1	0	0	0	0	0	0	0	0	0	0	0		0	0	0	0	0	0	0	0	0	0	0	0	0	0	0	norB; nitric oxide reductase subunit B [EC:1.7.2.5]
K00376	0	1	1	1	1	2		0	0	0	0	0	0	0	0	0	0	0		0	0	0	0	0	0	0	0	0	0	0	0		1	1	1	0	0	0	0	0	0	0	0	0	0	0	0	nosZ; nitrous-oxide reductase [EC:1.7.2.4]
K02588	0	0	0	0	0	0		0	0	0	0	0	0	0	0	0	0	0		0	0	0	0	0	0	0	0	0	0	0	0		1	1	1	0	0	0	0	0	0	0	0	0	0	0	0	nifH; nitrogenase iron protein NifH
K05601	0	0	0	0	0	0		0	0	0	0	0	0	0	1	1	1	1		0	0	0	0	0	1	1	0	0	0	1	1		0	0	0	0	0	0	0	0	0	0	0	0	0	0	0	hcp; hydroxylamine reductase [EC:1.7.99.1]
K00459	0	0	0	0	0	0		0	0	0	1	1	1	0	0	0	1	1		0	2	1	1	1	1	1	0	0	1	1	1		0	0	0	0	0	0	0	0	0	0	0	0	0	0	0	ncd2, npd; nitronate monooxygenase [EC:1.13.12.16]
K01501	0	0	0	0	0	0		0	0	0	0	0	0	0	0	0	0	0		0	0	0	0	0	0	0	0	0	0	0	0		0	0	0	0	0	0	0	0	0	0	0	0	0	0	1	E3.5.5.1; nitrilase [EC:3.5.5.1]
K15371	0	0	0	0	0	0		0	0	0	0	0	0	0	0	0	0	0		0	1	1	0	0	0	0	0	0	0	0	0		0	0	0	0	0	1	2	0	1	1	1	1	1	1	1	GDH2; glutamate dehydrogenase [EC:1.4.1.2]
K00261	2	3	1	1	1	1		0	1	1	1	1	1	0	1	1	1	0		0	0	0	0	1	1	1	1	0	0	0	0		1	1	1	0	1	1	1	0	1	1	1	1	1	1	0	GLUD1_2, gdhA; glutamate dehydrogenase (NAD(P)+) [EC:1.4.1.3]
K00262	0	0	0	0	0	0		0	1	0	0	0	0	0	0	0	0	0		1	0	1	0	0	0	1	1	1	0	1	1		1	1	1	0	1	1	1	0	1	1	1	1	1	1	1	E1.4.1.4, gdhA; glutamate dehydrogenase (NADP+) [EC:1.4.1.4]
K00265	0	0	0	0	0	0		0	0	0	0	0	0	0	0	0	0	0		0	0	0	0	0	1	1	1	1	1	1	1		0	0	0	0	0	0	0	0	0	0	0	0	0	0	0	gltB; glutamate synthase (NADPH) large chain [EC:1.4.1.13]
K00266	0	1	1	1	1	1		1	0	0	0	1	1	1	1	2	1	1		1	2	2	1	1	1	1	1	1	2	2	2		0	0	0	0	0	0	0	0	0	0	0	0	0	0	0	gltD; glutamate synthase (NADPH) small chain [EC:1.4.1.13]
K00926	0	1	1	1	1	1		1	1	1	1	1	1	1	1	1	1	1		1	1	1	1	1	1	1	1	1	1	0	0		1	1	1	0	1	1	1	1	1	1	2	1	1	1	1	arcC; carbamate kinase [EC:2.7.2.2]
K01673	1	0	1	1	1	1		0	0	0	0	0	0	0	0	0	0	0		0	0	0	1	0	0	1	2	1	0	0	0		0	0	0	0	0	0	0	0	1	0	0	0	0	0	0	cynT, can; carbonic anhydrase [EC:4.2.1.1]
K01743	0	0	0	0	0	0		0	0	0	0	0	0	0	0	0	0	0		0	0	1	0	0	0	0	0	0	0	0	0		0	0	0	0	0	0	0	0	0	0	0	0	0	0	0	E4.2.1.1; carbonic anhydrase [EC:4.2.1.1]
K23163	0	1	1	1	1	1		0	0	0	0	0	0	0	0	0	0	0		0	0	0	1	0	0	0	1	0	0	0	0		0	0	0	0	0	0	0	0	0	0	0	0	0	0	0	sbp; sulfate/thiosulfate transport system substrate-binding protein
K02046	1	1	1	1	1	1		0	0	0	0	0	0	0	0	0	0	0		0	0	0	1	0	0	0	1	0	0	0	0		0	0	0	0	0	0	0	0	0	0	0	0	0	0	0	cysU; sulfate/thiosulfate transport system permease protein
K02047	1	1	1	1	1	1		0	0	0	0	0	0	0	0	0	0	0		0	0	0	1	0	0	0	1	0	0	0	0		0	0	0	0	0	0	0	0	0	0	0	0	0	0	0	cysW; sulfate/thiosulfate transport system permease protein
K02045	1	1	0	1	1	0		0	0	0	0	0	0	0	0	0	0	0		0	0	0	0	0	0	0	1	0	0	0	0		0	0	0	0	0	0	0	0	0	0	0	0	0	0	0	cysA; sulfate/thiosulfate transport system ATP-binding protein [EC:7.3.2.3]
K00299	0	0	0	0	0	0		0	0	0	0	0	0	0	0	0	0	0		0	0	0	0	0	0	0	0	0	0	0	0		1	1	1	0	0	0	0	0	0	0	0	0	0	1	0	ssuE; FMN reductase [EC:1.5.1.38]
K00955	0	0	0	0	0	0		0	0	0	0	0	0	0	0	0	0	0		0	0	0	0	0	0	0	0	0	0	0	0		0	0	0	0	0	0	0	0	0	0	0	0	0	0	0	cysNC; bifunctional enzyme CysN/CysC [EC:2.7.7.4 2.7.1.25]
K00956	0	0	0	0	0	0		0	0	1	0	0	0	0	0	0	0	0		0	0	0	0	0	0	0	0	0	0	0	0		0	0	0	0	0	0	0	0	0	0	0	0	0	0	0	cysN; sulfate adenylyltransferase subunit 1 [EC:2.7.7.4]
K00957	0	0	0	0	0	0		0	0	1	0	0	0	0	0	0	0	0		0	0	0	0	0	0	0	0	0	0	0	0		0	0	0	0	0	0	0	0	0	0	0	0	0	0	0	cysD; sulfate adenylyltransferase subunit 2 [EC:2.7.7.4]
K00958	2	1	1	1	1	1		0	1	1	0	1	1	0	0	0	0	0		0	0	1	1	0	1	1	0	1	0	1	1		1	1	1	0	1	1	0	0	0	1	1	1	1	1	0	sat, met3; sulfate adenylyltransferase [EC:2.7.7.4]
K00860	0	0	0	0	0	0		0	1	1	1	1	0	0	0	0	0	0		0	0	1	1	0	1	1	0	1	0	1	1		0	0	0	0	0	0	0	0	0	0	0	0	0	0	0	cysC; adenylylsulfate kinase [EC:2.7.1.25]
K01082	1	1	1	0	1	1		0	0	0	1	1	1	0	0	0	0	0		0	0	1	1	0	0	1	1	1	1	0	0		1	1	1	1	1	1	1	1	1	1	1	1	0	0	1	cysQ, MET22, BPNT1; 3'(2'), 5'-bisphosphate nucleotidase [EC:3.1.3.7]
K06881	1	1	1	1	1	1		1	1	1	1	1	1	1	0	1	1	1		1	0	1	1	1	1	1	1	1	0	1	1		1	1	1	1	1	1	1	1	1	1	1	1	1	1	1	nrnA; bifunctional oligoribonuclease and PAP phosphatase NrnA [EC:3.1.3.7 3.1.13.3]
K00394	0	0	0	0	0	0		0	0	0	0	0	0	0	0	0	0	0		0	0	0	0	0	0	0	0	0	0	0	0		0	0	0	0	0	0	0	0	0	0	0	0	0	0	0	aprA; adenylylsulfate reductase, subunit A [EC:1.8.99.2]
K00395	0	0	0	0	0	0		0	0	1	0	0	0	0	0	0	0	0		0	0	0	0	0	0	0	0	0	0	0	0		0	0	0	0	0	0	0	0	0	0	0	0	0	0	0	aprB; adenylylsulfate reductase, subunit B [EC:1.8.99.2]
K00390	0	0	0	0	0	0		0	0	0	0	0	0	0	0	0	0	0		0	0	0	0	0	0	0	0	0	0	0	0		0	0	0	0	0	0	0	0	0	0	0	0	0	0	0	cysH; phosphoadenosine phosphosulfate reductase [EC:1.8.4.8 1.8.4.10]
K05301	1	0	0	0	0	0		0	0	0	0	0	0	0	0	0	0	0		0	0	0	0	0	0	0	0	1	0	0	0		0	0	0	0	0	0	0	0	0	0	0	0	0	0	0	E1.8.2.1; sulfite dehydrogenase [EC:1.8.2.1]
K17218	0	0	0	0	0	0		1	0	0	1	1	1	0	0	0	0	0		0	0	0	0	0	1	1	1	1	0	0	0		0	0	0	0	0	0	0	0	0	0	0	1	0	0	0	sqr; sulfide:quinone oxidoreductase [EC:1.8.5.4]
K17996	0	0	0	0	0	0		0	0	0	0	0	0	0	0	0	0	0		0	0	0	0	0	0	0	0	0	0	0	0		0	0	0	0	0	0	0	0	0	0	0	0	0	0	0	hydB; sulfhydrogenase subunit beta (sulfur reductase) [EC:1.12.98.4]
K17993	0	0	0	0	0	0		0	0	0	0	0	0	0	0	0	0	0		0	0	0	0	0	0	0	0	0	0	0	0		0	0	0	0	0	0	0	0	0	0	0	0	0	0	0	hydA; sulfhydrogenase subunit alpha [EC:1.12.1.3 1.12.1.5]
K16937	0	0	0	0	0	0		0	0	0	0	0	0	0	0	0	0	0		0	0	0	5	2	1	3	4	4	0	2	3		0	0	0	0	0	0	0	0	0	0	0	0	0	0	0	doxD; thiosulfate dehydrogenase [quinone] large subunit [EC:1.8.5.2]
K08357	0	0	0	0	0	0		0	0	0	0	1	1	0	0	0	0	0		0	0	0	0	0	0	0	0	0	0	0	0		0	0	0	0	0	0	0	0	0	0	0	0	0	0	0	ttrA; tetrathionate reductase subunit A
K08358	0	0	0	0	0	0		1	1	1	0	1	1	0	0	0	0	0		0	0	0	0	0	0	0	0	0	0	0	0		0	0	0	0	0	1	1	0	0	0	1	1	1	0	1	ttrB; tetrathionate reductase subunit B
K08352	0	1	1	1	1	1		0	0	0	1	0	0	0	0	0	0	0		1	0	0	1	0	0	0	0	0	0	1	1		0	0	0	0	0	0	0	0	0	0	0	0	0	0	0	phsA, psrA; thiosulfate reductase / polysulfide reductase chain A [EC:1.8.5.5]
K08354	0	0	0	0	0	0		0	0	0	0	0	0	0	0	0	0	0		1	0	0	0	1	1	1	0	0	0	0	0		0	0	0	0	0	0	0	0	0	0	0	0	0	0	0	phsC; thiosulfate reductase cytochrome b subunit
K01011	0	2	1	3	2	2		0	0	0	0	0	0	0	0	0	0	0		0	0	0	1	0	0	0	0	0	0	0	0		2	2	2	0	0	0	0	0	0	0	0	0	0	0	0	TST, MPST, sseA; thiosulfate/3-mercaptopyruvate sulfurtransferase [EC:2.8.1.1 2.8.1.2]
K00640	0	0	0	0	0	0		0	0	0	1	1	1	1	2	1	2	1		0	0	1	0	0	2	0	2	1	2	1	1		0	0	0	0	0	0	0	0	0	0	0	0	0	0	0	cysE; serine O-acetyltransferase [EC:2.3.1.30]
K01738	0	1	1	1	1	1		0	1	1	1	0	0	0	0	1	1	0		0	0	0	0	1	2	1	0	2	1	2	1		1	1	1	1	0	1	1	0	0	1	1	0	1	1	1	cysK; cysteine synthase [EC:2.5.1.47]
K00641	0	0	0	0	0	0		1	0	0	0	0	0	0	0	0	0	0		0	0	1	2	1	1	1	0	1	1	1	1		0	0	0	0	0	0	0	0	0	0	0	0	0	0	0	metX; homoserine O-acetyltransferase/O-succinyltransferase [EC:2.3.1.31 2.3.1.46]
K01739	0	0	0	0	0	0		1	0	0	0	0	0	0	0	0	0	0		0	0	0	0	0	0	0	0	0	0	0	0		0	0	0	0	0	0	1	0	0	0	1	0	1	1	1	metB; cystathionine gamma-synthase [EC:2.5.1.48]
K10764	0	0	0	0	0	0		0	0	0	0	0	0	0	0	0	0	0		0	0	0	0	0	0	1	0	0	0	0	0		0	0	0	0	0	0	0	0	0	0	0	0	0	0	0	metZ; O-succinylhomoserine sulfhydrylase [EC:2.5.1.-]
K17285	0	0	0	0	0	0		0	0	0	0	0	0	0	0	0	0	0		0	0	0	0	0	0	0	0	0	0	0	0		0	1	1	0	0	0	0	0	0	0	0	0	0	0	0	SELENBP1; methanethiol oxidase [EC:1.8.3.4]
K07307	0	0	0	0	0	0		0	0	0	0	0	0	0	0	0	0	0		0	0	0	0	0	0	0	0	0	0	0	0		0	0	0	0	0	0	0	0	0	0	0	0	0	0	0	dmsB; anaerobic dimethyl sulfoxide reductase subunit B
K21310	1	3	1	2	1	1		0	0	0	0	0	0	0	0	0	0	0		0	0	0	0	0	0	0	0	0	0	0	0		2	2	2	0	0	0	0	0	0	0	0	0	0	0	0	mddA; methanethiol S-methyltransferase [EC:2.1.1.334]
K18660	0	1	1	1	1	1		0	1	1	0	0	0	0	0	0	0	0		0	0	0	0	0	0	0	0	0	0	0	0		0	0	0	0	0	0	0	0	0	0	0	0	0	0	0	ACSF3; malonyl-CoA/methylmalonyl-CoA synthetase [EC:6.2.1.-]
K02078	3	1	2	1	2	3		1	1	1	1	1	1	1	1	1	1	1		2	1	3	2	2	2	2	2	2	1	3	3		3	3	3	2	1	3	3	0	2	2	1	2	2	1	2	acpP; acyl carrier protein
K00645	1	1	1	1	1	1		1	1	1	1	1	1	0	1	1	1	0		1	1	1	1	0	1	1	1	1	1	1	1		1	1	1	1	1	1	1	0	1	1	1	1	1	1	1	fabD, MCAT, MCT1; [acyl-carrier-protein] S-malonyltransferase [EC:2.3.1.39]
K00665	1	0	0	0	0	0		0	0	0	0	0	0	0	0	0	0	0		0	0	0	0	0	0	0	0	0	0	0	0		0	0	0	0	0	0	0	0	0	0	0	0	0	0	0	FASN; fatty acid synthase, animal type [EC:2.3.1.85]
K00648	2	2	2	2	2	2		2	2	2	2	2	2	2	2	2	3	1		1	2	2	2	2	1	1	3	1	1	1	1		1	1	1	0	1	1	1	1	1	1	1	1	1	1	1	fabH; 3-oxoacyl-[acyl-carrier-protein] synthase III [EC:2.3.1.180]
K09458	1	2	2	1	2	2		1	2	2	1	1	1	1	1	1	1	1		1	1	1	0	1	1	1	2	1	1	2	2		3	3	3	1	0	1	1	0	2	2	2	1	2	1	1	fabF, OXSM, CEM1; 3-oxoacyl-[acyl-carrier-protein] synthase II [EC:2.3.1.179]
K00059	5	5	4	5	5	4		4	2	3	5	3	2	1	1	3	3	1		1	2	5	1	3	4	3	1	2	2	4	4		5	5	5	1	1	4	2	1	2	2	4	5	2	2	2	fabG, OAR1; 3-oxoacyl-[acyl-carrier protein] reductase [EC:1.1.1.100]
K01716	0	0	0	0	0	0		0	0	0	0	0	0	0	0	0	0	0		0	0	0	0	0	0	0	0	0	0	0	0		0	0	0	1	0	1	1	1	1	1	0	1	0	1	1	fabA; 3-hydroxyacyl-[acyl-carrier protein] dehydratase / trans-2-decenoyl-[acyl-carrier protein] isomerase [EC:4.2.1.59 5.3.3.14]
K02372	1	1	1	1	1	1		1	1	1	1	1	1	1	1	1	1	1		1	1	1	1	1	1	1	1	1	0	1	1		1	1	1	2	1	2	2	2	2	2	1	2	2	1	2	fabZ; 3-hydroxyacyl-[acyl-carrier-protein] dehydratase [EC:4.2.1.59]
K16363	1	1	1	1	1	1		1	1	1	1	1	1	1	1	1	1	1		1	1	1	1	1	1	1	1	1	0	1	1		0	0	0	0	0	0	0	0	0	0	0	0	0	0	0	lpxC-fabZ; UDP-3-O-[3-hydroxymyristoyl] N-acetylglucosamine deacetylase / 3-hydroxyacyl-[acyl-carrier-protein] dehydratase [EC:3.5.1.108 4.2.1.59]
K00208	1	1	1	0	1	1		1	1	1	0	0	0	0	0	0	0	0		0	0	0	0	0	0	0	0	0	0	0	0		0	0	0	0	0	0	0	0	0	0	0	0	0	0	0	fabI; enoyl-[acyl-carrier protein] reductase I [EC:1.3.1.9 1.3.1.10]
K02371	0	0	0	0	0	0		0	0	0	1	1	0	0	0	0	0	0		0	0	0	0	0	0	0	0	0	0	0	0		0	0	0	0	0	0	0	0	0	0	0	0	0	0	0	fabK; enoyl-[acyl-carrier protein] reductase II [EC:1.3.1.9]
K10780	0	0	0	0	0	0		0	0	0	1	1	1	0	0	0	0	0		0	0	0	1	1	0	0	1	1	0	1	1		0	0	0	0	0	0	0	0	0	0	0	0	0	0	0	fabL; enoyl-[acyl-carrier protein] reductase III [EC:1.3.1.104]
K01071	1	1	0	0	0	0		0	0	0	0	0	0	0	0	0	0	0		0	0	0	1	0	0	1	1	0	0	0	0		1	1	1	0	0	1	0	0	1	1	0	0	0	0	0	MCH; medium-chain acyl-[acyl-carrier-protein] hydrolase [EC:3.1.2.21]
K03921	0	0	0	0	0	0		0	0	0	0	0	0	0	0	0	0	0		0	0	0	0	0	0	0	0	0	0	0	0		0	0	0	0	0	1	0	0	0	0	1	1	1	0	0	FAB2, SSI2, desA1; acyl-[acyl-carrier-protein] desaturase [EC:1.14.19.2 1.14.19.11 1.14.19.26]
K01897	3	2	2	2	2	2		3	2	2	5	4	4	2	1	1	3	2		3	1	3	3	4	3	4	5	1	1	6	2		1	1	1	1	0	1	1	1	2	1	0	3	3	2	1	ACSL, fadD; long-chain acyl-CoA synthetase [EC:6.2.1.3]
K07509	0	0	0	0	0	0		0	1	1	0	0	0	0	0	0	0	0		0	0	0	0	0	0	0	0	0	0	0	0		0	0	0	0	0	0	0	0	0	0	0	0	0	0	0	HADHB; acetyl-CoA acyltransferase [EC:2.3.1.16]
K01068	0	0	0	0	0	0		0	0	0	0	0	1	0	0	0	0	0		0	0	0	0	0	0	0	0	0	0	0	0		0	0	0	0	0	0	0	0	0	0	0	0	0	0	0	ACOT1_2_4; acyl-coenzyme A thioesterase 1/2/4 [EC:3.1.2.2]
K00632	0	0	0	0	0	0		0	2	1	1	1	1	0	0	0	0	0		0	0	0	0	0	0	0	0	0	0	0	0		0	0	0	0	0	0	0	0	0	0	0	0	0	0	0	fadA, fadI; acetyl-CoA acyltransferase [EC:2.3.1.16]
K13767	0	0	0	0	0	0		0	0	0	0	0	0	0	0	0	0	0		0	0	1	0	0	0	0	0	0	0	0	0		0	0	0	0	0	0	0	0	0	0	0	0	0	0	0	fadB; enoyl-CoA hydratase [EC:4.2.1.17]
K00249	0	1	1	1	0	1		0	0	0	2	0	0	1	0	1	0	0		0	1	1	0	0	0	0	0	0	1	0	1		1	1	1	1	1	0	1	0	1	1	1	1	1	1	0	ACADM, acd; acyl-CoA dehydrogenase [EC:1.3.8.7]
K06445	0	0	0	0	0	0		0	0	0	0	0	0	0	0	0	0	0		0	0	0	0	0	0	0	0	0	0	0	0		1	1	1	0	0	0	0	0	0	0	0	0	0	0	0	fadE; acyl-CoA dehydrogenase [EC:1.3.99.-]
K00252	1	1	1	0	1	1		1	1	0	1	1	1	0	0	0	0	0		0	0	0	0	0	0	0	0	0	0	0	0		1	1	1	1	1	1	1	0	1	0	1	1	1	0	1	GCDH, gcdH; glutaryl-CoA dehydrogenase [EC:1.3.8.6]
K05939	0	0	0	0	0	0		0	0	1	0	0	0	0	0	0	0	0		1	0	0	0	1	1	1	0	0	0	1	1		0	0	0	0	0	0	0	0	0	0	0	0	0	0	0	aas; acyl-[acyl-carrier-protein]-phospholipid O-acyltransferase / long-chain-fatty-acid--[acyl-carrier-protein] ligase [EC:2.3.1.40 6.2.1.20]
K13238	0	0	0	0	0	0		0	0	0	0	0	0	0	0	0	0	0		0	0	0	0	0	0	0	0	0	0	0	0		0	0	0	0	0	0	0	0	1	1	0	0	0	0	0	ECI1, DCI; Delta3-Delta2-enoyl-CoA isomerase [EC:5.3.3.8]
K07517	0	1	1	1	1	1		0	0	0	0	0	0	0	0	0	0	0		0	0	0	0	0	0	0	0	0	0	0	0		0	0	0	0	0	0	0	0	0	0	0	0	0	0	0	ECI1_2; Delta3-Delta2-enoyl-CoA isomerase [EC:5.3.3.8]
K00496	0	1	1	1	1	1		0	0	0	0	0	0	0	0	0	0	0		0	0	0	0	0	0	0	0	0	0	0	0		0	0	0	0	0	0	0	0	0	0	0	0	0	0	0	alkB1_2, alkM; alkane 1-monooxygenase [EC:1.14.15.3]
K00529	0	0	0	0	0	0		0	0	0	0	0	0	0	0	0	0	0		0	0	1	0	0	0	0	0	0	0	0	0		0	0	0	0	0	0	0	0	0	0	0	0	0	0	0	hcaD; 3-phenylpropionate/trans-cinnamate dioxygenase ferredoxin reductase component [EC:1.18.1.3]
K00801	0	0	0	0	0	0		0	0	0	0	0	0	0	0	0	0	0		0	0	0	0	0	0	0	0	0	0	0	0		0	0	0	0	0	1	0	0	1	1	0	1	1	1	1	FDFT1; farnesyl-diphosphate farnesyltransferase [EC:2.5.1.21]
K01796	0	0	0	0	0	0		0	0	0	0	1	0	0	0	0	0	0		0	0	0	0	0	0	0	0	0	0	0	0		0	0	0	0	0	0	0	0	0	0	0	0	0	0	0	E5.1.99.4, AMACR, mcr; alpha-methylacyl-CoA racemase [EC:5.1.99.4]
K01442	0	0	0	0	1	2		0	0	0	0	0	1	0	1	0	0	0		0	0	0	1	0	0	2	1	0	0	0	0		0	0	0	0	0	0	0	0	0	0	0	0	0	0	0	E3.5.1.24; choloylglycine hydrolase [EC:3.5.1.24]
K00076	0	0	0	0	0	0		0	0	0	0	0	0	0	0	0	0	0		0	0	0	0	0	0	0	0	0	0	0	0		0	0	0	0	0	0	0	0	0	0	0	0	0	0	0	hdhA; 7-alpha-hydroxysteroid dehydrogenase [EC:1.1.1.159]
K01130	0	0	0	0	0	0		1	0	0	0	0	0	0	0	0	0	0		0	0	3	1	1	5	23	10	2	0	2	2		0	0	0	0	1	0	1	1	3	1	0	0	0	0	0	E3.1.6.1, aslA; arylsulfatase [EC:3.1.6.1]
K05878	0	0	0	0	0	0		0	0	0	0	0	0	0	0	0	0	0		0	0	0	0	0	0	0	0	0	0	1	0		0	0	0	0	0	0	0	0	0	0	0	0	0	0	0	dhaK; phosphoenolpyruvate---glycerone phosphotransferase subunit DhaK [EC:2.7.1.121]
K05879	0	0	0	0	0	0		0	0	0	0	0	0	0	0	0	0	0		0	0	0	0	0	0	0	0	0	0	1	0		0	0	0	0	0	0	0	0	0	0	0	0	0	0	0	dhaL; phosphoenolpyruvate---glycerone phosphotransferase subunit DhaL [EC:2.7.1.121]
K00864	0	1	1	1	1	1		0	0	0	1	1	1	0	0	0	0	0		0	0	0	1	0	1	2	1	0	1	1	1		0	0	0	2	0	0	1	1	1	2	1	0	0	0	0	glpK, GK; glycerol kinase [EC:2.7.1.30]
K13507	1	0	0	0	0	0		0	0	0	0	0	0	0	0	0	0	0		0	0	0	0	0	0	0	0	0	0	0	0		1	1	1	1	0	1	1	0	1	1	0	1	1	1	1	GAT; glycerol-3-phosphate O-acyltransferase / dihydroxyacetone phosphate acyltransferase [EC:2.3.1.15 2.3.1.42]
K03621	2	1	1	1	1	1		1	1	1	1	1	1	1	1	1	1	0		1	1	1	1	0	1	1	1	1	1	1	1		1	1	1	0	1	1	1	1	1	1	1	1	1	1	1	plsX; phosphate acyltransferase [EC:2.3.1.274]
K08591	1	1	1	2	1	1		3	2	2	2	2	2	1	1	2	0	1		0	1	1	1	1	1	1	1	1	1	1	1		1	1	1	0	1	1	1	1	1	1	1	2	1	1	1	plsY; acyl phosphate:glycerol-3-phosphate acyltransferase [EC:2.3.1.275]
K00655	1	2	2	2	2	2		1	2	4	2	2	2	0	1	1	1	1		1	2	2	3	3	1	2	1	0	0	2	3		2	2	2	1	1	1	1	0	1	1	1	1	2	1	1	plsC; 1-acyl-sn-glycerol-3-phosphate acyltransferase [EC:2.3.1.51]
K07029	1	2	2	2	2	1		2	2	2	3	3	3	1	1	1	1	1		1	1	2	3	3	1	5	2	1	1	2	2		1	1	1	2	0	2	2	2	1	2	2	2	2	2	1	dagK; diacylglycerol kinase (ATP) [EC:2.7.1.107]
K01046	2	3	2	2	2	2		0	0	0	0	0	0	0	0	0	0	0		0	0	0	1	0	0	0	1	0	0	0	0		0	0	0	0	0	0	0	0	0	0	0	1	0	1	1	lip, TGL2; triacylglycerol lipase [EC:3.1.1.3]
K01054	0	0	0	0	0	0		0	0	0	0	0	0	0	0	0	0	0		0	0	0	0	0	0	0	0	0	0	0	0		0	0	0	0	0	0	0	0	0	0	0	0	0	0	0	MGLL; acylglycerol lipase [EC:3.1.1.23]
K19003	0	0	0	0	0	0		0	0	0	0	0	0	0	0	0	0	0		0	0	0	0	1	0	0	0	0	0	1	1		0	0	0	0	0	0	0	0	0	0	0	0	0	0	0	mgdA; 1,2-diacylglycerol 3-beta-glucosyltransferase [EC:2.4.1.336]
K00057	1	1	0	1	1	1		1	1	1	2	2	2	0	1	1	1	1		1	1	0	1	1	1	1	1	1	1	1	1		1	1	1	0	1	1	1	1	1	1	1	1	1	1	1	gpsA; glycerol-3-phosphate dehydrogenase (NAD(P)+) [EC:1.1.1.94]
K00111	2	2	2	2	2	2		1	2	2	2	2	2	0	1	1	1	1		1	2	2	2	1	1	1	2	2	0	2	2		3	3	3	1	0	3	2	2	3	3	2	2	2	2	2	glpA, glpD; glycerol-3-phosphate dehydrogenase [EC:1.1.5.3]
K00113	1	1	0	1	1	1		0	1	1	1	1	1	0	0	0	1	1		0	0	0	0	0	0	0	0	0	0	0	0		2	2	2	1	0	2	2	0	2	1	2	2	1	1	1	glpC; glycerol-3-phosphate dehydrogenase subunit C
K06123	0	0	0	0	0	0		0	0	0	0	0	0	0	0	0	0	0		0	1	0	0	1	0	0	0	0	0	0	0		0	0	0	0	0	0	0	0	0	0	0	0	0	0	0	AYR1; 1-acylglycerone phosphate reductase [EC:1.1.1.101]
K00980	0	0	0	0	0	0		0	0	0	0	0	0	1	0	0	0	0		0	0	0	0	0	0	0	0	0	0	0	0		0	0	0	0	0	0	0	0	0	0	0	0	0	0	0	tagD; glycerol-3-phosphate cytidylyltransferase [EC:2.7.7.39]
K01517	0	0	0	0	0	0		0	0	0	0	0	0	0	0	0	0	0		0	0	1	0	0	0	0	0	0	0	0	0		0	0	0	0	0	1	0	0	0	0	1	1	1	0	1	ADPRM; manganese-dependent ADP-ribose/CDP-alcohol diphosphatase [EC:3.6.1.13 3.6.1.16 3.6.1.53]
K01115	0	0	0	0	0	0		0	0	0	0	0	0	0	0	0	0	0		0	0	0	0	0	0	0	0	0	0	0	0		1	1	1	0	0	0	0	0	0	0	0	0	0	0	0	PLD1_2; phospholipase D1/2 [EC:3.1.4.4]
K17717	0	0	0	0	0	0		0	0	0	1	0	0	0	0	0	0	0		0	0	1	0	0	0	0	0	0	0	0	0		0	0	0	0	0	0	0	0	0	0	0	0	0	0	0	pld; phospholipase D [EC:3.1.4.4]
K01058	0	0	0	0	0	0		0	0	0	0	0	0	0	0	0	0	0		0	0	0	0	0	0	0	0	0	0	0	0		0	0	0	0	0	1	0	0	0	0	1	1	0	0	1	pldA; phospholipase A1/A2 [EC:3.1.1.32 3.1.1.4]
K01048	0	0	0	0	0	0		0	0	0	0	0	0	0	0	0	0	0		0	0	0	0	0	1	0	0	0	0	0	0		0	0	0	0	0	1	0	0	0	0	0	1	0	1	0	pldB; lysophospholipase [EC:3.1.1.5]
K01126	1	2	2	2	2	2		1	1	1	3	1	1	0	1	1	1	1		0	0	2	1	2	1	2	4	1	0	3	4		0	0	0	2	0	1	1	1	1	0	1	1	1	1	1	E3.1.4.46, glpQ, ugpQ; glycerophosphoryl diester phosphodiesterase [EC:3.1.4.46]
K00570	0	0	0	0	0	0		0	0	0	0	1	1	0	0	0	0	0		0	0	0	0	0	0	0	0	0	0	0	0		0	0	0	0	0	0	0	0	0	0	0	0	0	0	0	pmtA; phosphatidylethanolamine/phosphatidyl-N-methylethanolamine N-methyltransferase [EC:2.1.1.17 2.1.1.71]
K00981	1	1	1	1	1	1		1	1	1	1	1	1	0	1	0	1	2		1	1	1	1	1	1	1	1	1	1	1	1		1	1	1	1	0	3	1	2	1	1	1	2	1	2	1	E2.7.7.41, CDS1, CDS2, cdsA; phosphatidate cytidylyltransferase [EC:2.7.7.41]
K17103	1	1	1	1	1	1		1	1	1	1	1	1	1	0	1	1	1		1	1	2	1	1	1	1	1	0	1	1	1		1	1	1	1	1	2	1	2	0	1	1	1	1	2	1	CHO1, pssA; CDP-diacylglycerol---serine O-phosphatidyltransferase [EC:2.7.8.8]
K01613	1	1	2	2	2	2		1	2	2	1	1	1	1	0	1	1	1		1	1	1	1	1	1	1	1	0	1	1	1		1	1	1	1	1	1	1	1	1	1	1	1	1	1	1	psd, PISD; phosphatidylserine decarboxylase [EC:4.1.1.65]
K00995	0	1	1	1	1	1		1	1	1	1	1	1	1	1	1	1	1		0	0	1	1	0	1	0	0	1	0	0	0		1	1	1	1	1	1	1	1	1	1	1	1	1	1	1	pgsA, PGS1; CDP-diacylglycerol---glycerol-3-phosphate 3-phosphatidyltransferase [EC:2.7.8.5]
K01095	1	1	1	1	1	1		1	1	1	1	1	1	1	1	1	1	1		1	0	1	1	1	1	1	1	0	1	1	1		1	1	1	1	1	1	1	1	1	1	1	1	1	1	1	pgpA; phosphatidylglycerophosphatase A [EC:3.1.3.27]
K01096	0	0	1	1	1	1		0	0	0	0	0	0	0	0	0	0	0		0	0	0	0	0	0	0	0	0	0	0	0		0	0	0	0	0	0	0	0	0	0	0	0	0	0	0	pgpB; phosphatidylglycerophosphatase B [EC:3.1.3.27 3.1.3.81 3.1.3.4 3.6.1.27]
K18697	0	0	0	0	0	0		0	1	0	0	0	0	0	0	0	0	0		0	0	0	0	0	0	0	0	0	0	0	0		0	0	0	0	0	0	0	0	0	0	0	0	0	0	0	pgpC; phosphatidylglycerophosphatase C [EC:3.1.3.27]
K06131	0	0	0	0	0	0		0	0	0	0	0	0	0	0	0	0	0		0	0	0	0	0	0	1	0	0	0	0	0		1	1	1	0	0	0	0	0	0	0	0	0	0	0	0	clsA_B; cardiolipin synthase A/B [EC:2.7.8.-]
K06132	0	0	0	0	0	0		0	0	0	0	0	0	0	0	0	0	0		0	0	0	0	0	0	0	0	0	0	0	0		0	0	0	0	0	0	0	0	0	0	0	0	0	0	0	clsC; cardiolipin synthase C [EC:2.7.8.-]
K08744	0	0	0	0	0	0		0	0	0	0	0	0	0	0	0	0	0		0	0	0	0	0	0	0	0	0	0	0	0		0	0	0	0	0	0	0	0	0	0	1	0	0	0	0	CRLS; cardiolipin synthase (CMP-forming) [EC:2.7.8.41]
K13511	0	0	0	0	0	0		0	0	0	0	0	0	0	0	0	0	0		0	0	0	0	0	0	0	0	0	0	0	0		1	1	1	1	1	0	0	0	0	0	0	0	0	0	0	TAZ; monolysocardiolipin acyltransferase [EC:2.3.1.-]
K00096	0	0	0	0	0	0		0	0	0	0	0	0	0	1	1	1	1		0	0	0	0	0	0	1	1	1	0	1	1		0	0	0	0	0	0	0	0	0	0	0	0	0	0	0	araM, egsA; glycerol-1-phosphate dehydrogenase [NAD(P)+] [EC:1.1.1.261]
K17104	1	0	0	0	0	0		0	0	0	1	1	1	1	1	1	1	1		0	0	1	1	1	1	1	1	1	1	1	1		1	1	1	1	0	1	1	1	1	0	1	1	1	1	0	E2.5.1.41; phosphoglycerol geranylgeranyltransferase [EC:2.5.1.41]
K17105	1	0	1	1	1	1		0	1	1	1	1	1	0	0	0	1	0		1	1	1	1	1	1	1	1	1	1	1	1		1	2	2	1	0	1	1	1	1	1	1	1	1	1	2	E2.5.1.42; geranylgeranylglycerol-phosphate geranylgeranyltransferase [EC:2.5.1.42]
K19664	0	0	0	0	0	0		0	0	0	0	0	0	0	0	0	0	0		0	0	0	0	0	0	0	0	0	0	0	0		0	0	0	0	0	0	0	0	0	0	0	0	0	0	0	carS; CDP-2,3-bis-(O-geranylgeranyl)-sn-glycerol synthase [EC:2.7.7.67]
K17830	1	2	1	1	1	1		1	2	2	1	1	1	1	1	1	1	1		1	1	1	1	1	1	1	1	1	0	1	1		2	3	3	0	0	2	2	2	2	2	2	2	2	2	2	GGR; digeranylgeranylglycerophospholipid reductase [EC:1.3.1.101 1.3.7.11]
K00803	0	0	0	0	0	0		0	0	0	1	1	1	0	0	0	0	0		0	0	0	0	0	0	0	0	0	0	0	0		0	0	0	0	0	1	1	0	1	1	1	1	1	1	1	AGPS, agpS; alkyldihydroxyacetonephosphate synthase [EC:2.5.1.26]
K16795	0	0	0	0	0	0		0	0	0	0	0	0	0	0	0	0	0		0	0	0	0	0	0	0	1	0	0	0	0		0	0	0	0	0	0	0	0	0	0	0	0	0	0	0	PAFAH1B2_3; platelet-activating factor acetylhydrolase IB subunit beta/gamma [EC:3.1.1.47]
K01062	0	0	0	0	0	0		0	0	0	0	1	1	0	0	0	0	0		0	0	0	0	0	0	0	0	0	0	0	0		0	0	0	0	0	0	0	0	0	0	0	0	0	0	0	PLA2G7, PAFAH; platelet-activating factor acetylhydrolase [EC:3.1.1.47]
K04708	0	0	0	0	0	0		0	0	0	0	0	0	0	0	0	0	0		0	0	0	0	0	0	0	0	0	0	0	0		0	0	0	0	0	0	0	0	0	0	0	0	0	0	0	KDSR; 3-dehydrosphinganine reductase [EC:1.1.1.102]
K12349	1	0	0	0	0	0		0	0	0	0	0	0	1	1	0	1	1		0	0	0	0	0	0	0	0	0	0	0	0		2	2	2	0	0	0	0	0	0	1	0	0	0	0	0	ASAH2; neutral ceramidase [EC:3.5.1.23]
K04712	1	1	1	1	1	0		0	0	0	0	0	0	0	0	0	0	0		0	0	0	0	0	0	0	0	0	0	0	0		0	0	0	0	0	1	1	0	1	0	0	0	1	0	1	DEGS; sphingolipid 4-desaturase/C4-monooxygenase [EC:1.14.19.17 1.14.18.5]
K01634	0	0	0	0	0	0		0	0	0	1	0	0	0	0	0	0	0		0	0	0	0	0	0	0	0	0	0	0	0		0	0	0	0	0	0	0	0	0	0	0	0	0	0	0	SGPL1, DPL1; sphinganine-1-phosphate aldolase [EC:4.1.2.27]
K00720	0	1	1	1	1	1		0	0	0	0	1	1	0	0	0	0	0		0	0	0	0	0	0	0	0	0	0	0	0		0	0	0	0	0	0	0	0	0	0	0	0	0	0	0	UGCG; ceramide glucosyltransferase [EC:2.4.1.80]
K01201	0	1	0	1	0	0		0	0	0	0	0	0	0	0	0	0	0		0	0	0	5	1	0	1	1	1	0	0	0		0	0	0	0	0	0	0	0	0	0	0	0	0	0	0	GBA, srfJ; glucosylceramidase [EC:3.2.1.45]
K17108	0	1	0	0	0	0		0	0	0	0	0	0	0	1	2	1	0		0	0	0	0	0	1	0	2	1	0	1	1		0	0	0	0	0	0	0	0	0	0	0	0	0	0	0	GBA2; non-lysosomal glucosylceramidase [EC:3.2.1.45]
K01134	0	0	0	0	0	0		0	0	0	0	0	0	0	0	0	0	0		0	0	0	0	0	0	0	0	0	0	0	0		0	0	0	0	0	0	0	0	0	0	0	0	0	0	0	ARSA; arylsulfatase A [EC:3.1.6.8]
K01186	0	0	0	0	0	0		0	0	0	0	0	0	0	0	0	0	0		0	0	2	0	0	1	4	1	1	0	2	2		0	0	0	0	0	0	0	0	0	0	0	0	0	0	0	NEU1; sialidase-1 [EC:3.2.1.18]
K01254	0	0	0	0	0	0		0	0	0	0	0	0	0	0	0	0	0		0	0	0	0	0	0	0	0	0	0	0	0		0	0	0	1	0	0	0	0	0	0	0	0	0	0	0	LTA4H; leukotriene-A4 hydrolase [EC:3.3.2.6]
K00432	1	1	1	2	2	2		0	0	0	1	1	1	0	0	0	0	0		0	0	0	1	1	0	1	0	1	1	2	1		0	0	0	0	0	0	0	1	0	1	0	0	0	0	0	gpx; glutathione peroxidase [EC:1.11.1.9]
K00508	1	0	1	1	1	1		0	0	0	0	0	0	0	0	0	0	0		0	0	0	0	0	0	0	0	0	0	0	0		0	0	0	0	0	0	0	0	0	0	0	0	0	0	0	E1.14.19.3; linoleoyl-CoA desaturase [EC:1.14.19.3]
K00507	0	0	0	0	0	0		0	1	0	0	0	0	0	0	0	0	0		0	0	0	0	0	0	0	0	0	0	0	0		0	0	0	0	0	0	0	0	1	0	0	0	0	0	0	SCD, desC; stearoyl-CoA desaturase (Delta-9 desaturase) [EC:1.14.19.1]
K10804	1	2	1	2	2	2		0	1	1	0	0	0	0	1	0	0	0		0	0	0	0	1	0	1	0	0	0	2	1		1	1	1	0	0	2	0	0	0	1	1	2	1	1	0	tesA; acyl-CoA thioesterase I [EC:3.1.2.- 3.1.2.2 3.1.1.2 3.1.1.5]
K10806	0	0	0	0	0	0		0	1	1	1	1	1	0	0	0	0	0		1	1	0	0	0	0	1	0	0	0	0	0		0	0	0	0	0	0	0	0	0	0	0	0	0	0	0	yciA; acyl-CoA thioesterase YciA [EC:3.1.2.-]
K01515	1	0	0	0	0	0		0	0	0	0	0	0	0	0	0	0	0		1	1	0	0	1	0	0	1	0	1	1	0		0	0	0	0	0	0	0	0	0	0	0	0	1	0	0	nudF; ADP-ribose pyrophosphatase [EC:3.6.1.13]
K18453	0	0	0	0	0	0		0	0	0	0	0	0	0	0	0	0	0		0	0	0	0	0	0	0	0	0	0	0	0		0	0	0	0	0	1	1	0	1	1	1	1	1	0	1	NUDT23; ADP-ribose/FAD diphosphatase [EC:3.6.1.13 3.6.1.18]
K00764	1	1	2	1	1	1		1	1	1	1	1	1	1	2	1	1	1		1	2	1	1	2	2	2	1	1	0	2	2		1	1	1	1	1	1	1	1	1	0	1	1	1	1	1	purF, PPAT; amidophosphoribosyltransferase [EC:2.4.2.14]
K01945	2	1	1	2	1	1		1	1	1	1	1	1	1	1	1	1	1		1	0	2	2	1	2	1	2	1	1	1	1		1	1	1	1	1	2	2	0	1	0	2	2	2	1	1	purD; phosphoribosylamine---glycine ligase [EC:6.3.4.13]
K11175	1	1	1	1	1	1		1	1	1	1	1	1	0	1	1	0	1		0	0	1	1	1	1	1	1	1	1	1	1		1	1	1	0	0	2	1	1	1	1	1	1	1	1	1	purN; phosphoribosylglycinamide formyltransferase 1 [EC:2.1.2.2]
K23269	1	1	1	0	1	0		1	1	1	0	1	1	1	0	1	1	1		0	0	0	0	0	0	0	0	0	0	0	0		1	1	1	1	1	1	1	0	1	1	0	1	1	0	1	purL; phosphoribosylformylglycinamidine synthase subunit PurL [EC:6.3.5.3]
K23264	0	1	1	1	1	1		1	1	1	1	1	1	1	0	1	1	1		0	0	0	0	0	0	0	0	0	0	0	0		1	1	1	1	1	1	1	1	0	1	1	2	1	1	2	purS; phosphoribosylformylglycinamidine synthase subunit PurS [EC:6.3.5.3]
K23265	1	1	1	1	1	1		1	1	1	1	1	1	1	0	1	1	1		1	1	1	1	1	1	1	2	1	1	1	1		1	1	1	1	1	1	1	1	0	1	1	1	1	1	1	purQ; phosphoribosylformylglycinamidine synthase subunit PurQ / glutaminase [EC:6.3.5.3 3.5.1.2]
K23270	0	0	0	0	0	0		0	0	0	0	0	0	0	0	0	0	0		0	1	0	0	1	1	1	2	0	1	1	1		0	0	0	0	0	0	0	0	0	0	0	0	0	0	0	purSL; phosphoribosylformylglycinamidine synthase subunit PurSL [EC:6.3.5.3]
K01933	1	1	1	1	1	1		1	0	1	1	1	1	0	1	1	1	1		1	1	0	1	1	1	1	1	1	1	1	1		1	1	1	0	0	1	1	1	1	1	2	1	1	1	1	purM; phosphoribosylformylglycinamidine cyclo-ligase [EC:6.3.3.1]
K01589	0	1	1	1	1	1		0	1	0	0	0	0	0	0	0	0	0		0	0	0	0	0	0	0	0	0	0	0	0		0	0	0	0	0	0	0	0	0	0	0	0	0	0	0	purK; 5-(carboxyamino)imidazole ribonucleotide synthase [EC:6.3.4.18]
K01588	1	1	1	1	1	0		0	1	1	1	1	0	0	0	0	0	0		0	0	0	1	1	1	1	1	0	1	1	1		1	1	1	0	0	1	1	1	1	1	1	1	1	1	1	purE; 5-(carboxyamino)imidazole ribonucleotide mutase [EC:5.4.99.18]
K01923	1	1	1	1	1	2		2	2	2	1	1	1	1	1	2	2	2		0	1	2	0	0	0	0	0	0	1	0	0		1	1	1	1	1	1	1	1	1	1	1	1	1	1	2	purC; phosphoribosylaminoimidazole-succinocarboxamide synthase [EC:6.3.2.6]
K01756	1	1	1	1	1	1		1	1	1	1	1	1	1	1	1	1	1		1	1	1	1	1	1	1	1	0	1	1	1		2	2	2	1	0	2	1	1	1	1	1	1	1	1	2	purB, ADSL; adenylosuccinate lyase [EC:4.3.2.2]
K00602	1	1	1	1	1	1		2	1	1	1	1	1	0	1	1	1	1		1	0	1	1	1	1	1	1	1	1	1	1		1	1	1	0	1	2	1	1	1	1	1	1	1	1	1	purH; phosphoribosylaminoimidazolecarboxamide formyltransferase / IMP cyclohydrolase [EC:2.1.2.3 3.5.4.10]
K00759	1	1	2	1	1	1		1	1	1	1	1	1	0	0	1	0	1		1	1	1	1	1	1	1	1	2	1	1	1		1	1	1	0	1	1	1	1	0	1	0	0	0	0	1	APRT, apt; adenine phosphoribosyltransferase [EC:2.4.2.7]
K01081	0	0	0	0	0	0		0	0	0	0	1	1	0	0	1	1	0		0	0	0	0	0	0	0	0	0	0	0	0		0	0	0	0	0	0	0	0	0	0	0	0	0	0	0	E3.1.3.5; 5'-nucleotidase [EC:3.1.3.5]
K03787	1	1	1	1	1	1		1	1	1	1	1	1	0	1	1	1	0		1	1	1	1	1	1	1	1	1	1	1	2		1	1	1	1	0	1	1	1	1	1	1	1	1	1	1	surE; 5'-nucleotidase [EC:3.1.3.5]
K03783	1	2	2	3	2	2		2	2	2	2	2	2	1	2	2	2	2		2	2	2	2	2	2	2	2	2	1	2	2		1	1	1	1	1	2	2	1	2	2	1	1	1	1	3	punA, PNP; purine-nucleoside phosphorylase [EC:2.4.2.1]
K03784	1	0	0	0	0	0		0	0	0	0	0	0	0	0	0	0	0		0	0	0	0	0	0	0	0	0	0	0	0		1	1	1	0	0	0	0	0	0	0	0	0	0	0	0	deoD; purine-nucleoside phosphorylase [EC:2.4.2.1]
K01239	0	1	1	2	0	0		0	0	0	0	0	0	0	0	0	0	0		0	0	1	1	0	1	1	0	0	1	1	1		0	0	0	0	0	0	0	0	0	0	0	0	0	0	0	iunH; purine nucleosidase [EC:3.2.2.1]
K00760	0	1	1	1	1	1		1	1	1	1	1	1	1	1	0	0	0		1	1	1	0	1	1	1	1	1	1	1	1		0	0	0	1	1	1	1	1	1	0	1	1	1	1	1	hprT, hpt, HPRT1; hypoxanthine phosphoribosyltransferase [EC:2.4.2.8]
K00088	1	1	1	1	1	1		1	1	1	1	1	1	1	1	1	1	1		1	1	0	1	1	1	1	1	1	1	1	1		1	1	1	1	2	1	1	1	1	0	1	1	1	2	1	IMPDH, guaB; IMP dehydrogenase [EC:1.1.1.205]
K00940	0	1	1	1	1	1		1	1	1	1	1	1	1	1	1	1	1		1	1	1	1	0	1	1	2	0	1	1	1		1	1	1	0	1	1	1	1	1	1	1	1	1	1	1	ndk, NME; nucleoside-diphosphate kinase [EC:2.7.4.6]
K02428	0	1	1	1	1	1		1	1	1	1	1	0	1	1	1	1	1		1	1	1	0	1	1	1	0	0	1	1	1		0	0	0	1	1	1	1	1	1	1	1	1	1	1	1	rdgB; XTP/dITP diphosphohydrolase [EC:3.6.1.66]
K13481	0	0	0	0	0	0		0	1	0	0	0	0	0	0	0	0	0		0	0	0	1	1	0	0	0	0	0	0	0		1	1	1	1	0	0	1	0	1	0	0	1	1	1	0	xdhA; xanthine dehydrogenase small subunit [EC:1.17.1.4]
K11177	1	1	0	0	0	0		1	1	1	0	0	0	0	0	0	0	0		0	0	0	1	0	0	0	1	0	0	0	0		1	1	1	0	0	0	0	1	0	0	0	0	0	0	0	yagR; xanthine dehydrogenase YagR molybdenum-binding subunit [EC:1.17.1.4]
K11178	1	1	0	0	0	0		1	1	1	0	0	0	0	0	0	0	0		0	0	1	1	0	0	1	1	0	0	0	0		1	1	1	0	0	0	0	1	0	0	0	0	0	0	0	yagS; xanthine dehydrogenase YagS FAD-binding subunit [EC:1.17.1.4]
K13483	0	0	0	0	0	0		1	0	0	0	0	0	0	0	0	0	0		0	0	0	0	0	0	1	1	0	0	0	0		1	1	1	0	0	0	0	1	0	0	0	1	0	0	0	yagT; xanthine dehydrogenase YagT iron-sulfur-binding subunit
K01518	0	0	0	0	0	0		0	0	0	0	0	0	0	0	0	0	0		0	0	0	0	0	0	0	0	0	0	0	0		0	0	0	1	0	0	0	0	0	0	0	0	0	0	0	NUDT2; bis(5'-nucleosidyl)-tetraphosphatase [EC:3.6.1.17]
K01951	1	1	1	1	1	1		2	1	1	1	1	1	0	1	1	1	1		1	2	1	2	2	1	1	1	2	1	2	2		2	2	2	1	1	1	1	1	2	2	1	1	1	1	1	guaA, GMPS; GMP synthase (glutamine-hydrolysing) [EC:6.3.5.2]
K00942	1	0	1	1	1	1		0	1	1	1	1	1	1	0	1	0	1		1	1	1	3	1	1	1	0	1	0	1	1		1	1	1	0	0	1	1	1	1	1	1	1	1	0	1	E2.7.4.8, gmk; guanylate kinase [EC:2.7.4.8]
K00525	1	1	1	1	1	1		2	1	1	2	1	1	0	1	2	1	1		0	1	2	1	1	1	1	1	1	1	1	1		0	0	0	0	1	1	1	0	0	1	0	1	0	1	0	E1.17.4.1A, nrdA, nrdE; ribonucleoside-diphosphate reductase alpha chain [EC:1.17.4.1]
K00526	1	0	0	0	0	0		0	0	0	0	0	0	0	0	0	0	0		0	0	0	0	0	0	0	0	0	0	0	0		1	1	1	0	0	0	0	0	0	0	0	0	0	0	0	E1.17.4.1B, nrdB, nrdF; ribonucleoside-diphosphate reductase beta chain [EC:1.17.4.1]
K21636	0	0	0	0	0	0		0	0	0	0	0	0	0	1	1	1	1		0	0	0	0	0	1	1	0	0	0	1	1		0	0	0	0	0	0	0	0	0	0	0	0	0	0	0	nrdD; ribonucleoside-triphosphate reductase (formate) [EC:1.1.98.6]
K15518	0	0	0	0	0	0		1	0	0	0	0	0	0	0	0	0	0		1	0	0	0	0	0	0	0	0	0	0	0		0	0	0	0	0	0	0	0	0	0	0	0	0	0	0	dgk; deoxyguanosine kinase [EC:2.7.1.113]
K01129	1	2	1	1	1	1		1	1	1	1	1	1	1	0	1	1	1		1	2	0	1	1	1	2	1	1	1	1	1		0	0	0	2	2	1	0	1	1	1	1	1	1	1	2	dgt; dGTPase [EC:3.1.5.1]
K01524	1	2	2	1	2	1		0	0	0	1	1	1	1	1	1	1	1		1	0	0	1	0	1	1	1	1	0	2	1		2	2	2	1	1	1	1	0	1	1	1	1	1	1	1	ppx-gppA; exopolyphosphatase / guanosine-5'-triphosphate,3'-diphosphate pyrophosphatase [EC:3.6.1.11 3.6.1.40]
K00951	1	2	1	1	1	1		1	1	1	1	1	1	1	1	0	1	1		1	1	4	1	1	1	1	0	1	1	1	1		1	1	1	1	1	1	1	1	1	1	2	1	1	2	1	relA; GTP pyrophosphokinase [EC:2.7.6.5]
K07816	0	0	0	0	0	0		0	0	0	0	0	0	0	0	0	0	0		0	0	0	1	0	0	0	0	0	0	0	0		0	0	0	0	0	0	0	0	0	0	0	0	0	0	0	E2.7.6.5X; putative GTP pyrophosphokinase [EC:2.7.6.5]
K01768	7	6	6	4	7	6		1	2	2	2	2	2	1	1	2	2	2		4	3	2	3	3	3	3	3	2	4	4	4		2	2	2	1	0	2	1	2	2	2	2	2	2	1	2	E4.6.1.1; adenylate cyclase [EC:4.6.1.1]
K05873	0	1	1	1	0	0		0	0	0	0	1	1	0	0	0	0	0		0	0	1	0	0	0	0	0	0	0	0	0		0	0	0	0	0	0	0	0	0	0	0	0	0	0	0	cyaB; adenylate cyclase, class 2 [EC:4.6.1.1]
K01939	1	1	1	1	1	1		1	1	1	1	1	1	0	1	2	1	1		1	0	0	0	1	1	1	2	1	1	1	1		1	1	1	2	1	1	1	1	1	1	1	1	2	1	0	purA, ADSS; adenylosuccinate synthase [EC:6.3.4.4]
K00856	0	0	0	0	0	0		0	0	0	0	0	0	0	0	0	0	0		0	0	0	0	0	0	0	0	0	0	0	0		0	0	0	0	0	0	0	0	0	0	0	0	0	0	0	E2.7.1.20, ADK; adenosine kinase [EC:2.7.1.20]
K15519	0	0	0	0	0	0		1	1	1	0	1	1	0	0	0	0	0		1	1	0	1	1	1	1	1	1	1	1	1		1	1	1	0	0	0	1	1	1	1	1	1	0	1	1	dck; deoxyadenosine/deoxycytidine kinase [EC:2.7.1.76 2.7.1.74]
K01488	0	1	1	1	1	1		0	3	3	0	1	1	0	0	0	0	0		1	1	0	0	1	1	1	0	0	1	1	1		1	1	1	1	0	1	1	0	1	1	1	1	0	1	0	add, ADA; adenosine deaminase [EC:3.5.4.4]
K01241	0	0	0	0	0	0		1	0	0	0	0	0	0	0	0	0	0		1	1	1	2	1	0	1	1	1	0	1	1		0	0	0	0	0	0	0	0	0	0	0	0	0	0	0	amn; AMP nucleosidase [EC:3.2.2.4]
K01486	0	0	0	0	0	0		1	0	0	0	0	0	0	0	0	0	0		1	0	1	2	1	1	1	1	2	1	1	1		0	0	0	0	0	0	0	0	0	0	0	0	0	0	0	ade; adenine deaminase [EC:3.5.4.2]
K01119	0	0	0	0	0	0		0	0	0	0	0	0	0	0	0	0	0		0	0	0	0	0	0	0	0	0	0	0	0		1	1	1	1	0	1	1	0	1	1	1	1	1	0	0	cpdB; 2',3'-cyclic-nucleotide 2'-phosphodiesterase / 3'-nucleotidase [EC:3.1.4.16 3.1.3.6]
K00939	0	1	1	1	1	1		0	1	1	1	1	0	1	1	1	1	1		1	1	1	1	1	1	1	1	0	1	1	1		1	1	1	1	0	2	0	0	1	0	2	1	0	2	1	adk, AK; adenylate kinase [EC:2.7.4.3]
K06928	0	0	0	0	0	0		1	0	0	1	0	0	0	0	1	1	1		0	0	1	0	0	0	1	1	0	0	0	0		1	1	1	0	0	0	0	0	0	0	0	0	0	0	0	NTPCR; nucleoside-triphosphatase [EC:3.6.1.15]
K03651	1	2	2	2	1	1		0	0	0	0	0	0	0	0	0	0	0		0	0	0	0	0	0	1	0	0	0	0	0		0	0	0	0	0	0	0	0	0	0	0	0	0	0	0	cpdA; 3',5'-cyclic-AMP phosphodiesterase [EC:3.1.4.53]
K19710	2	1	1	1	1	1		1	1	1	1	1	1	1	0	1	1	0		1	1	1	1	1	0	0	1	0	1	1	1		0	0	0	0	0	1	1	1	1	1	0	1	1	0	1	E2.7.7.53; ATP adenylyltransferase [EC:2.7.7.53]
K04765	0	0	0	0	0	0		0	0	0	0	0	0	0	0	0	1	0		0	0	0	0	1	0	1	0	0	0	1	0		0	0	0	1	1	0	0	0	0	0	0	0	0	0	0	mazG; nucleoside triphosphate diphosphatase [EC:3.6.1.9]
K00365	1	0	1	1	1	1		0	0	0	0	0	0	0	0	0	0	0		0	0	0	0	0	0	0	0	0	0	0	0		0	0	0	0	0	0	0	0	0	0	0	0	0	0	0	uaZ; urate oxidase [EC:1.7.3.3]
K07127	1	0	1	1	1	1		0	0	0	0	0	0	0	0	0	0	0		0	0	0	0	0	0	0	0	0	0	0	0		0	0	0	0	0	0	0	0	0	0	0	0	0	0	0	uraH, pucM, hiuH; 5-hydroxyisourate hydrolase [EC:3.5.2.17]
K13484	0	0	1	0	0	0		0	0	0	0	0	0	0	0	0	0	0		0	0	0	0	0	0	0	0	0	0	0	0		0	0	0	0	0	0	0	0	0	0	0	0	0	0	0	TTHL; 5-hydroxyisourate hydrolase / 2-oxo-4-hydroxy-4-carboxy-5-ureidoimidazoline decarboxylase [EC:3.5.2.17 4.1.1.97]
K16840	0	0	1	1	1	1		0	0	0	0	0	0	0	0	0	0	0		0	0	0	0	0	0	0	0	0	0	0	0		0	0	0	0	0	0	0	0	0	0	0	0	0	0	0	hpxQ; 2-oxo-4-hydroxy-4-carboxy-5-ureidoimidazoline decarboxylase [EC:4.1.1.97]
K16841	0	0	0	0	0	0		0	0	0	0	0	0	1	0	0	0	0		0	0	0	0	0	0	0	0	0	0	0	0		0	0	0	0	0	0	0	0	0	0	0	0	0	0	0	hpxA; allantoin racemase [EC:5.1.99.3]
K01466	1	0	0	1	1	1		0	0	0	0	0	0	0	0	0	0	0		0	0	0	0	0	0	0	0	0	0	0	0		0	0	0	0	0	0	0	0	0	0	0	0	0	0	0	allB; allantoinase [EC:3.5.2.5]
K01477	0	0	1	1	1	1		0	0	0	0	0	0	0	0	0	0	0		0	0	0	0	0	0	0	0	0	0	0	0		0	0	0	0	0	0	0	0	0	0	0	0	0	0	0	alc, ALLC; allantoicase [EC:3.5.3.4]
K02083	1	0	0	0	0	0		0	0	0	0	0	0	0	0	0	0	0		0	0	0	0	0	0	0	0	0	0	0	0		0	0	0	0	0	0	0	0	0	0	0	0	0	0	0	allC; allantoate deiminase [EC:3.5.3.9]
K14977	1	0	0	0	0	0		0	0	0	0	0	0	0	0	0	0	0		0	0	0	0	0	0	0	0	0	0	0	0		0	0	0	0	0	0	0	0	0	0	0	0	0	0	0	ylbA, UGHY; (S)-ureidoglycine aminohydrolase [EC:3.5.3.26]
K18151	1	0	0	0	0	0		0	0	0	0	0	0	0	0	0	0	0		0	0	0	0	0	0	0	0	0	0	0	0		0	0	0	0	0	0	0	0	0	0	0	0	0	0	0	UAH; ureidoglycolate amidohydrolase [EC:3.5.1.116]
K01483	0	1	1	1	0	0		0	0	0	0	0	0	0	0	0	0	0		0	0	0	1	0	1	0	0	1	0	0	0		0	0	0	0	0	0	0	0	0	0	0	0	0	0	0	allA; ureidoglycolate lyase [EC:4.3.2.3]
K01955	1	1	0	0	1	0		1	1	1	1	1	1	1	0	1	0	0		0	0	1	0	1	0	1	1	1	0	2	2		1	1	1	0	1	0	1	0	1	1	1	0	1	1	0	carB, CPA2; carbamoyl-phosphate synthase large subunit [EC:6.3.5.5]
K01956	1	0	1	0	1	1		1	1	2	0	1	0	1	0	1	0	1		0	0	1	1	1	1	1	1	0	1	1	0		1	1	1	0	1	0	1	1	1	1	0	1	1	1	0	carA, CPA1; carbamoyl-phosphate synthase small subunit [EC:6.3.5.5]
K00609	1	1	1	1	1	1		1	1	1	1	1	1	1	0	1	1	1		1	1	1	1	1	1	1	2	1	0	1	1		1	1	1	1	1	1	1	0	1	1	1	1	1	1	1	pyrB, PYR2; aspartate carbamoyltransferase catalytic subunit [EC:2.1.3.2]
K01465	2	1	0	2	2	2		1	2	2	1	1	0	1	1	1	1	1		1	0	1	1	1	1	1	1	1	0	1	1		1	1	1	1	1	1	1	0	1	1	2	1	2	2	2	URA4, pyrC; dihydroorotase [EC:3.5.2.3]
K17828	1	1	1	1	1	1		1	1	1	1	1	1	0	1	1	1	1		1	1	1	1	1	1	1	1	1	1	1	1		1	1	1	0	0	1	1	1	1	1	1	1	1	1	1	pyrDI; dihydroorotate dehydrogenase (NAD+) catalytic subunit [EC:1.3.1.14]
K02823	1	1	1	1	1	0		1	1	1	1	1	1	0	1	1	0	1		1	1	1	1	1	1	1	1	1	1	1	1		1	1	1	1	0	1	1	1	0	0	1	1	1	1	1	pyrDII; dihydroorotate dehydrogenase electron transfer subunit
K00226	0	1	1	1	1	0		1	0	0	1	0	0	0	0	2	2	2		0	0	1	0	1	2	1	1	0	0	1	1		1	1	1	0	0	0	0	0	0	0	0	0	0	0	0	pyrD; dihydroorotate dehydrogenase (fumarate) [EC:1.3.98.1]
K00254	0	0	0	0	0	0		0	0	0	0	0	0	0	0	0	0	0		0	0	0	0	0	0	0	0	0	0	0	0		0	0	0	0	0	0	0	0	0	0	0	0	0	0	0	DHODH, pyrD; dihydroorotate dehydrogenase [EC:1.3.5.2]
K00762	0	0	0	0	0	0		1	1	1	1	1	1	1	1	1	1	1		0	1	0	1	1	1	1	1	1	1	2	1		0	0	0	1	1	1	1	0	0	1	0	1	1	1	0	pyrE; orotate phosphoribosyltransferase [EC:2.4.2.10]
K01591	1	1	1	0	1	1		1	1	1	1	1	1	1	1	1	1	1		0	1	1	1	1	1	1	1	1	0	2	1		1	1	1	1	1	1	1	0	0	1	1	1	1	0	0	pyrF; orotidine-5'-phosphate decarboxylase [EC:4.1.1.23]
K09903	1	1	1	1	1	1		1	1	1	1	1	1	1	1	1	1	1		1	1	1	1	1	1	1	1	1	1	1	1		2	1	1	1	0	1	1	1	1	0	1	1	1	1	1	pyrH; uridylate kinase [EC:2.7.4.22]
K01937	1	1	1	2	1	1		1	1	1	2	1	1	0	2	1	1	1		0	1	1	2	1	1	1	2	1	1	1	1		1	1	1	0	2	2	1	1	1	1	0	1	1	0	1	pyrG, CTPS; CTP synthase [EC:6.3.4.2]
K00945	1	1	1	1	1	1		1	1	1	2	1	1	1	1	1	1	1		1	0	0	1	1	1	1	1	1	1	1	1		1	1	1	1	0	1	1	1	1	1	1	1	1	1	1	cmk; CMP/dCMP kinase [EC:2.7.4.25]
K01494	1	1	0	1	1	1		2	1	1	1	1	2	1	1	1	1	1		1	1	1	0	0	1	1	0	0	0	0	0		1	1	1	1	1	1	1	1	1	1	1	1	1	2	1	dcd; dCTP deaminase [EC:3.5.4.13]
K00876	0	1	1	2	1	1		1	1	1	1	1	1	0	0	1	0	1		1	1	1	1	1	1	1	1	1	1	1	1		1	1	1	1	1	1	1	0	1	1	1	1	1	0	1	udk, UCK; uridine kinase [EC:2.7.1.48]
K00757	0	0	0	0	0	0		0	0	0	0	0	0	0	0	0	0	0		0	0	0	0	0	0	0	0	0	0	0	0		0	0	0	0	0	0	0	0	0	0	0	0	0	0	0	udp, UPP; uridine phosphorylase [EC:2.4.2.3]
K00761	0	0	0	0	0	0		0	1	1	1	1	1	0	0	0	0	0		0	0	0	0	1	0	1	0	0	0	0	0		0	0	0	0	0	0	0	0	0	0	0	0	0	0	0	upp, UPRT; uracil phosphoribosyltransferase [EC:2.4.2.9]
K02825	1	1	1	1	1	1		1	1	1	1	1	1	1	0	1	1	1		1	0	1	1	1	1	1	1	1	0	1	1		1	1	1	1	1	0	0	0	0	0	0	0	0	0	0	pyrR; pyrimidine operon attenuation protein / uracil phosphoribosyltransferase [EC:2.4.2.9]
K17722	1	1	1	1	1	0		0	0	0	0	0	0	0	0	0	0	0		0	0	0	0	0	0	0	0	0	0	0	0		0	0	0	0	0	0	0	0	0	0	0	0	0	0	0	preT; dihydropyrimidine dehydrogenase (NAD+) subunit PreT [EC:1.3.1.1]
K17723	1	1	1	1	1	1		0	0	0	0	0	0	0	0	0	0	0		0	0	0	0	0	0	0	0	0	0	0	0		0	0	0	0	0	0	0	0	0	0	0	0	0	0	0	preA; dihydropyrimidine dehydrogenase (NAD+) subunit PreA [EC:1.3.1.1]
K01464	1	1	1	0	1	1		0	1	1	0	1	1	0	0	0	0	0		0	0	0	0	0	0	0	0	0	0	0	0		0	0	0	1	0	1	1	0	0	1	1	1	1	1	1	DPYS, dht, hydA; dihydropyrimidinase [EC:3.5.2.2]
K01431	0	1	1	1	1	1		0	0	0	0	0	0	0	0	0	0	0		0	0	0	0	0	0	0	0	0	0	0	0		0	0	0	0	0	0	0	0	0	0	0	0	0	0	0	UPB1, pydC; beta-ureidopropionase [EC:3.5.1.6]
K06016	0	0	0	0	0	0		0	0	0	0	0	0	0	0	0	0	0		0	0	0	0	0	0	0	0	0	0	0	0		0	0	0	0	0	1	1	0	1	1	1	0	1	1	0	pydC; beta-ureidopropionase / N-carbamoyl-L-amino-acid hydrolase [EC:3.5.1.6 3.5.1.87]
K09021	0	0	0	0	0	0		0	0	0	0	0	0	0	0	0	0	0		0	0	0	0	0	0	0	0	0	0	0	0		0	0	0	0	0	0	0	0	0	0	0	0	0	0	0	rutC; aminoacrylate peracid reductase
K16066	0	0	0	0	0	0		0	0	0	0	0	0	0	0	0	0	0		0	0	0	0	0	0	0	0	0	0	0	0		0	0	0	0	1	0	0	0	0	0	0	0	0	0	0	ydfG; 3-hydroxy acid dehydrogenase / malonic semialdehyde reductase [EC:1.1.1.381 1.1.1.-]
K00756	0	1	1	0	1	1		0	0	0	1	1	1	0	0	0	0	0		1	0	1	1	1	1	0	1	1	0	1	0		1	1	1	1	1	0	0	0	1	0	0	0	1	0	0	pdp; pyrimidine-nucleoside phosphorylase [EC:2.4.2.2]
K01485	0	0	0	0	0	0		0	0	0	0	0	0	0	0	0	0	0		0	0	0	0	0	0	0	0	0	0	0	0		0	0	0	0	0	0	0	0	0	0	0	0	0	0	0	codA; cytosine/creatinine deaminase [EC:3.5.4.1 3.5.4.21]
K03365	0	0	0	0	0	0		0	1	1	0	0	0	0	0	0	0	0		0	0	0	0	0	0	0	0	0	0	0	0		0	0	0	0	0	0	0	0	0	0	0	0	0	0	0	FCY1; cytosine/creatinine deaminase [EC:3.5.4.1 3.5.4.21]
K16904	0	0	0	0	0	0		0	0	0	0	0	0	0	0	0	0	0		0	0	0	0	0	1	0	0	0	0	0	0		0	0	0	0	0	0	0	0	0	0	0	0	0	0	0	DCTPP1; dCTP diphosphatase [EC:3.6.1.12]
K01520	0	1	1	1	1	1		0	0	0	1	1	1	0	0	0	0	0		0	0	0	0	0	2	0	0	0	0	0	0		1	1	1	0	1	1	1	0	1	1	1	0	1	0	0	dut, DUT; dUTP pyrophosphatase [EC:3.6.1.23]
K00560	0	0	0	0	0	1		0	0	0	0	0	0	1	1	1	1	1		0	0	1	1	0	1	0	0	0	0	1	1		1	1	1	1	1	1	0	0	1	0	1	1	1	1	2	thyA, TYMS; thymidylate synthase [EC:2.1.1.45]
K03465	2	1	1	1	1	1		0	1	1	1	1	1	0	1	1	1	1		1	1	1	1	1	1	1	2	1	1	1	1		0	0	0	0	0	0	0	0	0	0	0	0	0	0	0	thyX, thy1; thymidylate synthase (FAD) [EC:2.1.1.148]
K01489	0	1	1	2	1	1		1	1	1	1	1	1	0	0	0	0	0		1	0	1	1	1	1	1	1	1	1	1	1		0	0	0	1	1	1	1	0	1	2	2	2	1	0	1	cdd, CDA; cytidine deaminase [EC:3.5.4.5]
K01493	0	0	0	0	0	1		1	1	1	0	0	0	0	1	1	1	1		1	0	1	0	0	0	1	0	0	0	1	1		0	0	0	0	0	0	0	0	0	0	0	0	0	0	0	comEB; dCMP deaminase [EC:3.5.4.12]
K00857	0	1	1	2	1	1		1	1	1	1	1	1	0	0	0	0	0		1	1	1	1	1	1	1	1	1	0	1	1		1	1	1	1	1	1	1	0	1	1	1	1	1	1	1	tdk, TK; thymidine kinase [EC:2.7.1.21]
K00943	0	1	1	1	1	1		1	1	1	1	1	1	0	1	1	1	1		1	1	1	3	3	1	1	3	1	2	3	3		1	1	1	0	1	1	1	1	1	1	1	1	1	1	1	tmk, DTYMK; dTMP kinase [EC:2.7.4.9]
K16329	0	0	0	0	0	0		0	0	0	0	0	0	0	0	0	0	0		0	0	0	0	0	0	0	0	0	0	0	0		0	0	0	1	0	0	0	0	0	0	0	0	0	0	0	psuG; pseudouridylate synthase [EC:4.2.1.70]
K00812	1	1	0	0	1	1		1	1	1	1	1	1	2	2	2	2	2		0	0	1	1	1	1	1	1	0	0	1	1		0	0	0	0	0	0	1	1	1	1	1	1	1	1	1	aspB; aspartate aminotransferase [EC:2.6.1.1]
K11358	0	0	0	0	0	0		0	0	0	0	0	0	0	0	0	0	0		1	1	1	1	0	0	0	1	0	0	0	0		0	0	0	0	0	0	0	0	0	0	0	0	0	0	0	yhdR; aspartate aminotransferase [EC:2.6.1.1]
K00278	0	0	0	0	0	0		0	0	0	1	1	1	1	1	0	1	0		1	0	1	0	1	1	1	1	0	1	1	1		0	0	0	0	0	0	0	0	0	0	0	0	0	0	0	nadB; L-aspartate oxidase [EC:1.4.3.16]
K01779	0	0	0	0	0	0		1	2	2	0	0	0	0	0	0	0	0		0	0	0	0	1	1	0	1	1	0	0	1		1	1	1	0	0	2	1	1	1	1	1	1	1	1	1	racD; aspartate racemase [EC:5.1.1.13]
K01424	1	1	0	0	1	1		0	0	0	0	0	0	0	0	0	0	0		2	1	1	1	2	2	1	1	0	0	1	1		0	0	0	0	1	1	0	0	1	1	1	0	0	1	1	E3.5.1.1, ansA, ansB; L-asparaginase [EC:3.5.1.1]
K13051	0	0	0	0	0	0		0	1	1	0	0	0	0	0	0	0	0		0	0	0	0	0	0	0	0	0	0	0	0		0	0	0	1	1	1	1	1	1	1	0	1	1	0	1	ASRGL1, iaaA; L-asparaginase / beta-aspartyl-peptidase [EC:3.5.1.1 3.4.19.5]
K01914	0	0	0	0	0	0		0	0	0	0	0	0	0	0	0	0	0		0	0	1	0	0	0	1	1	1	0	0	0		0	0	0	0	0	0	0	0	0	0	0	0	0	0	0	asnA; aspartate--ammonia ligase [EC:6.3.1.1]
K01953	5	7	12	11	8	9		3	0	0	1	0	1	0	5	2	2	1		2	4	5	2	1	3	2	4	7	2	4	2		5	5	5	3	1	1	1	2	2	1	0	0	1	0	1	asnB, ASNS; asparagine synthase (glutamine-hydrolysing) [EC:6.3.5.4]
K00827	1	0	1	1	1	1		0	0	0	0	0	0	0	0	0	0	0		0	0	0	0	0	0	0	0	0	0	0	0		0	0	0	0	0	0	0	0	0	0	0	0	0	0	0	AGXT2; alanine-glyoxylate transaminase / (R)-3-amino-2-methylpropionate-pyruvate transaminase [EC:2.6.1.44 2.6.1.40]
K00259	2	3	3	3	3	3		2	1	1	2	2	2	2	1	1	2	2		2	0	1	1	0	1	0	0	0	0	0	0		2	2	2	1	1	1	1	0	1	1	1	1	1	1	1	ald; alanine dehydrogenase [EC:1.4.1.1]
K19244	0	0	0	1	0	0		0	0	0	0	0	0	0	0	0	0	0		0	0	0	0	0	0	0	0	0	0	0	0		0	0	0	0	1	1	1	0	0	1	0	0	1	0	0	ala; alanine dehydrogenase [EC:1.4.1.1]
K01744	0	0	0	0	0	0		0	0	0	0	0	0	0	0	0	0	0		1	0	0	0	0	2	1	0	0	0	0	0		0	0	0	0	0	0	0	0	0	0	0	0	0	0	0	aspA; aspartate ammonia-lyase [EC:4.3.1.1]
K01940	2	2	2	2	2	4		0	1	1	1	1	1	0	1	1	1	0		1	0	0	1	0	1	1	1	1	1	1	1		0	0	0	0	1	1	0	0	0	1	0	1	0	3	0	argG, ASS1; argininosuccinate synthase [EC:6.3.4.5]
K01755	1	1	1	1	1	1		1	1	1	1	1	1	1	1	1	1	1		1	0	1	0	0	1	1	1	1	1	1	1		0	0	0	0	1	0	0	0	0	1	0	0	0	1	0	argH, ASL; argininosuccinate lyase [EC:4.3.2.1]
K00294	0	0	1	0	1	0		1	1	1	1	1	1	0	1	1	1	0		1	0	1	0	1	0	1	0	0	0	1	1		1	1	1	1	1	1	0	0	0	1	0	1	1	0	0	E1.2.1.88; 1-pyrroline-5-carboxylate dehydrogenase [EC:1.2.1.88]
K01425	1	1	0	0	0	0		0	0	0	0	0	0	0	0	0	0	0		0	0	0	0	0	0	0	1	0	0	0	0		0	0	0	0	1	0	0	0	0	0	0	0	0	0	0	glsA, GLS; glutaminase [EC:3.5.1.2]
K00928	0	0	0	0	0	0		0	0	0	1	1	1	1	1	2	1	1		1	0	0	1	0	2	2	2	2	2	2	2		0	0	0	0	0	0	0	1	0	0	0	0	0	0	0	lysC; aspartate kinase [EC:2.7.2.4]
K12524	0	0	0	0	0	0		0	0	0	0	0	0	0	0	0	0	0		0	0	1	0	0	1	1	1	1	1	1	1		0	0	0	0	0	0	0	0	0	0	0	0	0	0	0	thrA; bifunctional aspartokinase / homoserine dehydrogenase 1 [EC:2.7.2.4 1.1.1.3]
K00133	1	0	0	0	0	0		0	0	0	1	1	1	1	1	2	1	0		0	0	1	1	1	1	1	1	1	0	1	1		0	0	0	1	0	1	1	2	0	0	1	0	0	1	1	asd; aspartate-semialdehyde dehydrogenase [EC:1.2.1.11]
K00003	0	0	0	0	0	0		0	0	0	1	1	1	0	0	1	1	1		0	0	0	0	0	0	0	0	0	0	0	0		0	0	0	0	0	0	0	0	0	0	0	0	0	0	0	hom; homoserine dehydrogenase [EC:1.1.1.3]
K00872	2	2	2	1	2	2		1	1	2	2	1	1	1	1	2	1	2		2	1	1	1	2	2	2	1	1	1	2	2		2	2	2	1	1	1	2	1	1	2	1	2	2	2	1	thrB1; homoserine kinase [EC:2.7.1.39]
K02204	0	0	0	0	0	0		0	0	0	0	0	0	0	0	0	0	0		0	1	0	0	0	0	0	0	0	0	0	0		0	0	0	0	0	0	0	1	0	1	0	0	0	0	0	thrB2; homoserine kinase type II [EC:2.7.1.39]
K01733	2	3	2	2	2	2		0	2	2	3	2	2	1	0	1	1	1		1	1	3	2	4	1	2	2	1	1	2	2		1	2	2	2	1	4	2	2	2	3	3	3	3	1	2	thrC; threonine synthase [EC:4.2.3.1]
K01620	1	1	1	1	1	1		1	0	0	1	1	1	0	0	0	0	0		1	0	1	1	1	1	1	1	0	1	2	1		1	1	1	1	1	0	0	0	0	0	0	0	0	0	0	ltaE; threonine aldolase [EC:4.1.2.48]
K00639	1	1	1	1	1	1		0	1	2	0	1	0	1	2	2	2	2		1	2	1	1	1	1	1	1	0	0	1	1		0	0	0	1	1	0	0	0	1	2	0	1	1	1	0	kbl, GCAT; glycine C-acetyltransferase [EC:2.3.1.29]
K00060	0	0	0	0	0	0		0	1	0	0	1	0	0	1	1	0	1		0	0	1	1	1	1	1	1	0	1	1	0		1	1	1	0	0	0	0	0	0	0	0	0	1	1	0	tdh; threonine 3-dehydrogenase [EC:1.1.1.103]
K15789	0	0	0	0	0	0		0	0	0	0	1	1	0	0	0	0	0		0	0	0	0	0	0	0	0	0	0	0	0		0	0	0	0	1	0	0	0	1	1	0	1	0	0	0	TDH; threonine 3-dehydrogenase [EC:1.1.1.103]
K00274	1	0	1	0	1	1		0	0	0	0	0	0	0	0	0	0	0		0	0	0	0	0	0	0	0	0	0	0	0		0	0	0	0	0	0	0	0	1	1	0	0	0	0	0	MAO, aofH; monoamine oxidase [EC:1.4.3.4]
K00499	0	0	0	0	0	0		0	0	0	0	0	0	0	0	0	0	0		0	0	0	0	0	0	0	0	0	0	0	0		0	0	0	0	0	0	0	0	0	0	0	0	0	0	0	CMO; choline monooxygenase [EC:1.14.15.7]
K00108	0	0	0	0	0	0		0	0	0	0	0	0	0	0	0	0	0		0	0	0	0	0	0	0	0	0	0	0	0		0	0	0	0	0	0	0	0	0	1	0	0	0	0	0	betA, CHDH; choline dehydrogenase [EC:1.1.99.1]
K00130	1	1	1	0	1	0		0	0	0	0	0	0	0	0	0	0	0		0	0	0	0	0	0	0	0	0	0	0	0		0	0	0	0	0	0	0	0	0	0	0	0	0	0	0	betB, gbsA; betaine-aldehyde dehydrogenase [EC:1.2.1.8]
K00315	0	0	0	0	0	0		0	0	0	0	0	0	0	0	0	0	0		0	0	0	0	0	0	0	0	0	0	0	0		0	0	0	1	0	0	0	0	0	0	0	0	0	0	0	DMGDH; dimethylglycine dehydrogenase [EC:1.5.8.4]
K00303	0	0	0	0	0	0		0	0	0	0	0	0	0	0	0	0	0		1	0	0	0	0	0	0	0	0	0	0	0		0	0	0	1	0	0	0	0	0	1	1	0	0	0	0	soxB; sarcosine oxidase, subunit beta [EC:1.5.3.1]
K00314	0	0	0	0	0	0		0	0	0	0	0	0	0	0	0	0	0		0	0	0	0	0	0	0	0	0	0	0	0		0	0	0	1	0	0	0	0	0	0	0	0	0	0	0	SARDH; sarcosine dehydrogenase [EC:1.5.8.3]
K01697	2	2	2	2	3	1		0	1	1	0	0	0	0	0	0	0	0		0	0	0	0	0	0	0	0	0	0	0	0		1	1	1	1	0	1	1	0	0	1	1	0	1	1	1	CBS; cystathionine beta-synthase [EC:4.2.1.22]
K01758	1	1	0	0	1	1		1	1	1	0	0	0	0	0	0	0	0		0	0	0	0	0	0	0	0	0	0	0	0		1	1	1	1	0	0	1	0	0	0	1	0	1	1	1	CTH; cystathionine gamma-lyase [EC:4.4.1.1]
K01752	1	0	1	1	1	2		0	0	0	0	0	0	0	0	0	0	0		0	0	0	0	0	0	0	0	0	0	1	0		0	0	0	0	0	0	0	0	0	0	0	0	0	0	0	E4.3.1.17, sdaA, sdaB, tdcG; L-serine dehydratase [EC:4.3.1.17]
K01754	4	4	4	4	4	4		1	4	3	0	0	0	0	0	0	0	0		2	1	1	0	0	1	1	1	0	0	0	0		2	2	2	2	2	5	4	2	4	3	5	2	4	2	1	E4.3.1.19, ilvA, tdcB; threonine dehydratase [EC:4.3.1.19]
K17989	0	0	0	0	0	0		0	0	0	0	0	0	0	0	0	0	0		0	0	0	0	0	0	0	0	0	0	0	0		0	0	0	0	0	0	0	0	0	0	1	0	0	0	0	SDS, SDH, CHA1; L-serine/L-threonine ammonia-lyase [EC:4.3.1.17 4.3.1.19]
K12235	0	1	0	2	1	1		0	1	1	0	0	0	0	0	0	0	0		1	0	1	0	0	0	0	0	0	0	0	0		0	0	0	0	0	0	0	0	0	0	0	0	0	0	0	SRR; serine racemase [EC:5.1.1.18]
K01695	1	1	1	1	1	1		1	1	0	0	1	0	1	1	1	1	1		0	0	0	0	0	1	1	1	0	1	0	0		1	1	1	0	1	1	1	1	0	1	2	1	2	1	0	trpA; tryptophan synthase alpha chain [EC:4.2.1.20]
K01696	1	1	1	1	0	0		1	1	0	0	0	0	1	1	1	1	1		0	0	0	0	0	1	1	1	0	0	0	0		1	1	1	0	1	1	1	1	0	1	1	1	1	0	0	trpB; tryptophan synthase beta chain [EC:4.2.1.20]
K06001	0	0	0	0	0	0		0	0	0	1	1	1	0	1	1	1	1		1	0	0	1	1	1	1	1	0	0	1	1		0	0	0	0	0	0	0	0	0	0	0	0	0	0	0	trpB; tryptophan synthase beta chain [EC:4.2.1.20]
K00836	0	0	0	0	0	0		0	0	0	0	0	0	0	0	0	0	0		0	0	0	0	0	0	0	0	0	0	0	0		0	0	0	0	0	0	0	0	0	0	0	0	0	0	0	ectB, dat; diaminobutyrate-2-oxoglutarate transaminase [EC:2.6.1.76]
K06720	0	0	0	0	0	0		0	0	0	0	0	0	0	0	0	0	0		0	0	0	0	0	0	0	0	0	0	0	0		0	0	0	0	0	0	0	1	0	0	0	0	0	0	0	ectC; L-ectoine synthase [EC:4.2.1.108]
K01760	1	3	1	0	2	2		1	1	1	1	1	1	0	1	0	1	1		0	0	1	0	1	0	0	0	0	0	0	0		1	1	1	1	0	0	1	0	0	0	1	0	1	1	1	metC; cysteine-S-conjugate beta-lyase [EC:4.4.1.13]
K14155	0	0	0	0	0	0		0	0	0	0	0	0	0	0	0	0	0		0	0	0	0	0	0	0	1	1	0	1	0		0	0	0	0	0	0	0	0	0	0	0	0	0	0	0	patB, malY; cysteine-S-conjugate beta-lyase [EC:4.4.1.13]
K00547	0	0	0	0	0	0		0	1	1	0	0	0	0	0	0	0	0		0	0	0	0	0	0	0	0	0	0	0	0		0	0	0	0	0	0	0	0	1	1	1	1	0	0	0	mmuM, BHMT2; homocysteine S-methyltransferase [EC:2.1.1.10]
K00548	1	2	1	2	1	1		1	2	2	2	1	1	1	0	1	1	1		1	0	2	1	2	0	1	0	0	1	1	1		1	1	1	1	1	1	1	0	1	1	1	1	1	1	1	metH, MTR; 5-methyltetrahydrofolate--homocysteine methyltransferase [EC:2.1.1.13]
K00549	1	1	1	1	2	1		0	2	0	0	0	0	0	0	0	0	1		1	0	0	0	0	1	0	0	1	0	0	1		3	3	3	0	0	0	0	0	0	1	0	1	0	0	0	metE; 5-methyltetrahydropteroyltriglutamate--homocysteine methyltransferase [EC:2.1.1.14]
K00789	1	1	1	1	1	1		1	1	1	1	1	1	1	1	1	1	1		0	1	2	1	1	1	1	1	2	1	1	1		1	1	1	1	1	1	1	1	1	2	1	1	1	1	1	metK; S-adenosylmethionine synthetase [EC:2.5.1.6]
K01611	0	1	1	1	1	1		1	0	0	0	0	0	0	0	0	0	0		1	0	0	0	0	0	1	1	0	0	0	0		1	1	1	0	0	0	0	0	0	0	0	0	0	0	0	speD, AMD1; S-adenosylmethionine decarboxylase [EC:4.1.1.50]
K00797	0	2	2	1	1	1		3	1	2	2	1	1	1	1	1	1	1		2	1	1	2	2	1	1	2	1	0	0	0		1	1	1	0	0	1	2	0	2	1	3	2	1	0	0	speE, SRM; spermidine synthase [EC:2.5.1.16]
K00772	0	0	0	0	0	0		0	0	0	0	0	0	0	0	0	0	0		0	0	0	1	1	1	1	1	1	1	1	1		0	0	0	0	0	0	0	0	0	0	0	0	0	0	0	mtaP, MTAP; 5'-methylthioadenosine phosphorylase [EC:2.4.2.28]
K12960	1	1	1	1	1	1		0	1	1	1	1	1	0	0	0	0	0		0	0	1	0	0	0	0	0	0	0	0	0		0	0	0	0	0	0	0	0	0	0	0	0	0	0	0	mtaD; 5-methylthioadenosine/S-adenosylhomocysteine deaminase [EC:3.5.4.31 3.5.4.28]
K08963	1	1	1	1	1	1		1	1	1	1	1	1	0	1	1	0	1		0	0	1	1	1	1	1	1	1	1	1	1		1	1	1	1	1	1	1	1	1	1	0	1	1	0	0	mtnA; methylthioribose-1-phosphate isomerase [EC:5.3.1.23]
K08965	0	0	0	0	0	0		0	0	0	0	1	1	0	0	0	0	0		0	0	0	0	0	0	0	0	0	0	0	0		0	0	0	0	0	0	0	0	0	0	0	0	0	0	0	mtnW; 2,3-diketo-5-methylthiopentyl-1-phosphate enolase [EC:5.3.2.5]
K08966	0	1	0	1	1	1		1	1	1	1	1	1	0	1	1	1	0		1	0	0	0	0	1	1	0	0	0	2	1		1	1	1	0	1	1	1	1	1	1	1	0	1	1	1	mtnX; 2-hydroxy-3-keto-5-methylthiopentenyl-1-phosphate phosphatase [EC:3.1.3.87]
K00558	1	0	1	1	0	1		0	0	0	0	0	0	0	0	0	0	0		0	0	0	1	0	0	1	0	0	0	1	0		0	0	0	0	0	0	0	0	0	0	0	0	0	0	0	DNMT1, dcm; DNA (cytosine-5)-methyltransferase 1 [EC:2.1.1.37]
K01251	2	1	1	1	1	1		1	1	1	1	1	1	1	1	0	1	1		0	0	2	1	1	1	1	1	2	1	1	1		1	1	1	1	1	1	1	1	1	1	1	1	1	1	1	E3.3.1.1, ahcY; adenosylhomocysteinase [EC:3.3.1.1]
K01505	0	1	1	1	1	1		1	0	0	1	0	0	0	0	0	0	0		0	0	0	0	0	0	0	0	0	0	0	0		0	0	0	0	0	0	0	0	0	0	0	0	0	0	0	E3.5.99.7; 1-aminocyclopropane-1-carboxylate deaminase [EC:3.5.99.7]
K01740	0	0	0	0	0	0		1	0	0	0	0	0	0	0	0	0	0		0	0	0	0	1	1	1	1	0	1	1	1		0	0	0	0	0	0	0	0	0	0	0	0	0	0	0	metY; O-acetylhomoserine (thiol)-lyase [EC:2.5.1.49]
K00826	1	1	1	1	1	1		0	1	1	1	1	1	1	1	1	1	1		0	0	1	0	1	1	1	1	0	1	1	1		1	1	1	1	1	1	1	0	1	2	1	1	1	1	1	E2.6.1.42, ilvE; branched-chain amino acid aminotransferase [EC:2.6.1.42]
K01919	0	0	0	0	0	0		0	0	0	0	0	0	0	0	0	0	0		0	0	0	0	0	0	0	0	0	0	0	0		0	0	0	0	0	0	0	0	0	0	0	0	0	0	0	gshA; glutamate--cysteine ligase [EC:6.3.2.2]
K01920	0	0	0	0	0	0		0	0	0	0	0	0	0	0	0	0	0		0	0	0	0	0	1	0	0	0	0	0	0		0	0	0	0	0	0	0	0	0	0	0	0	0	0	0	gshB; glutathione synthase [EC:6.3.2.3]
K05396	0	1	1	1	1	1		1	2	1	1	1	1	0	0	0	0	0		0	0	0	0	1	0	1	0	0	0	1	1		1	1	1	0	0	1	1	1	1	1	0	1	0	1	1	dcyD; D-cysteine desulfhydrase [EC:4.4.1.15]
K16843	0	0	0	0	0	0		0	0	0	1	0	0	0	0	0	0	0		0	0	0	0	0	0	0	0	0	0	0	0		0	0	0	0	0	0	0	0	0	0	0	0	0	0	0	slcC; (S)-sulfolactate dehydrogenase [EC:1.1.1.310]
K16845	0	0	0	0	0	0		1	0	0	0	0	0	0	0	0	0	0		0	0	0	0	0	0	0	0	0	0	0	0		0	0	0	0	0	0	0	0	0	0	0	0	0	0	0	suyA; (2R)-sulfolactate sulfo-lyase subunit alpha [EC:4.4.1.24]
K16846	0	0	0	0	0	0		1	0	0	0	0	0	0	0	0	0	0		0	0	0	0	0	0	0	0	0	0	0	0		0	0	0	0	0	0	0	0	0	0	0	0	0	0	0	suyB; (2R)-sulfolactate sulfo-lyase subunit beta [EC:4.4.1.24]
K12339	0	0	0	0	0	0		0	0	0	0	0	0	0	0	0	0	0		0	0	0	1	0	0	1	1	0	1	0	0		1	1	1	1	1	1	1	1	1	0	1	1	1	1	1	cysM; S-sulfo-L-cysteine synthase (O-acetyl-L-serine-dependent) [EC:2.5.1.144]
K08968	1	1	1	1	1	1		1	0	0	1	0	0	0	0	0	0	0		0	0	1	1	1	1	1	0	0	0	1	1		0	0	0	0	1	1	1	1	1	1	1	1	1	1	1	msrC; L-methionine (R)-S-oxide reductase [EC:1.8.4.14]
K01761	0	2	1	0	1	1		1	0	0	1	2	2	0	1	0	1	1		0	0	1	0	0	0	0	0	0	0	0	0		0	0	0	0	0	0	0	0	0	0	0	0	0	0	0	E4.4.1.11; methionine-gamma-lyase [EC:4.4.1.11]
K00263	1	2	4	2	4	3		0	0	0	0	0	0	0	0	0	0	0		0	0	0	0	0	0	0	0	0	0	0	0		0	0	0	0	0	1	0	0	1	1	1	0	1	1	1	E1.4.1.9; leucine dehydrogenase [EC:1.4.1.9]
K00186	0	0	0	0	0	0		0	0	0	0	0	0	0	0	0	0	0		0	1	1	0	0	0	0	0	0	0	0	0		1	1	1	0	0	0	0	0	0	0	0	0	0	0	0	vorA; 2-oxoisovalerate ferredoxin oxidoreductase, alpha subunit [EC:1.2.7.7]
K00187	1	1	1	1	1	1		0	0	0	0	0	0	0	1	1	1	1		1	1	1	1	1	1	1	1	0	1	1	0		1	1	1	0	0	0	0	0	0	0	0	0	0	0	0	vorB; 2-oxoisovalerate ferredoxin oxidoreductase, beta subunit [EC:1.2.7.7]
K00253	1	0	0	0	0	0		0	0	0	1	1	1	0	0	0	0	0		0	0	0	0	0	0	0	0	0	0	0	0		0	0	0	0	0	0	0	0	0	0	0	0	0	0	0	IVD, ivd; isovaleryl-CoA dehydrogenase [EC:1.3.8.4]
K08683	0	0	0	0	0	0		0	0	0	0	0	0	0	0	0	0	0		0	0	0	0	0	0	0	0	0	0	0	0		0	0	0	1	0	0	0	0	0	0	0	1	0	1	0	HSD17B10; 3-hydroxyacyl-CoA dehydrogenase / 3-hydroxy-2-methylbutyryl-CoA dehydrogenase [EC:1.1.1.35 1.1.1.178]
K00020	1	1	1	1	1	1		1	1	1	1	1	1	0	0	0	0	0		0	0	2	1	1	1	3	1	1	1	1	1		1	1	1	0	1	1	0	0	0	1	1	1	1	0	0	mmsB, HIBADH; 3-hydroxyisobutyrate dehydrogenase [EC:1.1.1.31]
K01969	0	0	0	0	0	0		0	0	0	0	0	0	0	0	0	0	0		0	0	1	0	0	0	0	1	0	0	0	0		0	0	0	0	0	0	0	0	0	0	0	0	0	0	0	E6.4.1.4B; 3-methylcrotonyl-CoA carboxylase beta subunit [EC:6.4.1.4]
K05607	0	0	0	0	0	0		0	0	0	1	1	0	0	0	0	0	0		0	0	0	0	0	0	0	0	0	0	0	0		0	0	0	0	0	0	1	1	1	1	0	1	0	0	0	AUH; methylglutaconyl-CoA hydratase [EC:4.2.1.18]
K13766	0	0	0	0	0	0		0	0	0	0	0	0	0	0	0	0	0		1	0	0	0	0	0	0	0	0	0	0	0		0	0	0	0	0	0	0	0	0	0	0	0	0	0	0	liuC; methylglutaconyl-CoA hydratase [EC:4.2.1.18]
K00053	0	0	0	0	0	0		1	0	0	1	1	1	1	1	1	1	1		0	0	0	2	1	1	1	1	1	1	1	1		0	0	0	0	0	0	0	0	0	0	1	0	0	0	0	ilvC; ketol-acid reductoisomerase [EC:1.1.1.86]
K01687	0	0	0	0	1	1		0	0	0	1	1	1	0	0	1	2	2		0	0	0	1	0	1	1	1	0	0	1	1		0	0	0	1	0	0	0	0	0	0	0	0	0	0	0	ilvD; dihydroxy-acid dehydratase [EC:4.2.1.9]
K00835	0	0	0	0	0	0		0	0	0	0	0	0	0	0	0	0	0		0	0	0	0	0	1	0	0	0	0	0	0		0	0	0	0	0	0	0	0	0	0	0	0	0	0	0	avtA; valine--pyruvate aminotransferase [EC:2.6.1.66]
K01714	1	1	0	0	0	0		0	0	0	1	1	1	1	0	1	1	1		0	0	0	1	0	1	1	1	1	1	1	2		0	0	0	0	1	1	0	0	0	0	1	1	1	1	1	dapA; 4-hydroxy-tetrahydrodipicolinate synthase [EC:4.3.3.7]
K00215	0	0	0	1	0	0		0	0	0	1	1	1	1	0	1	1	0		0	0	0	1	0	1	1	1	1	1	1	1		0	0	0	0	0	1	0	1	0	0	0	1	1	0	1	dapB; 4-hydroxy-tetrahydrodipicolinate reductase [EC:1.17.1.8]
K00674	0	0	0	0	0	0		1	0	0	1	1	1	1	1	0	1	1		0	0	0	0	0	1	1	0	0	0	1	1		0	0	0	0	0	1	0	1	0	0	0	1	1	1	1	dapD; 2,3,4,5-tetrahydropyridine-2,6-dicarboxylate N-succinyltransferase [EC:2.3.1.117]
K00821	0	0	0	0	0	0		0	0	0	1	1	1	0	1	1	1	0		0	0	0	0	0	1	1	1	0	0	1	1		0	0	0	1	1	0	0	0	0	0	0	0	0	0	0	argD; acetylornithine/N-succinyldiaminopimelate aminotransferase [EC:2.6.1.11 2.6.1.17]
K01439	0	1	1	2	2	2		0	0	0	0	0	0	1	0	1	1	1		0	0	0	0	0	0	0	0	0	0	0	0		0	0	0	0	0	0	0	0	0	0	0	0	0	0	0	dapE; succinyl-diaminopimelate desuccinylase [EC:3.5.1.18]
K01778	0	1	1	1	1	1		1	1	1	1	1	1	1	1	1	1	0		1	1	0	1	1	1	1	1	1	1	1	1		1	1	1	0	1	1	1	1	0	1	1	1	1	1	1	dapF; diaminopimelate epimerase [EC:5.1.1.7]
K10206	0	0	0	0	0	0		0	0	0	0	0	0	0	0	0	0	0		0	0	0	1	0	0	0	1	1	1	0	0		0	0	0	0	0	0	0	0	0	0	0	0	0	0	0	E2.6.1.83; LL-diaminopimelate aminotransferase [EC:2.6.1.83]
K01586	1	1	2	1	1	1		1	1	1	1	1	1	0	1	1	1	1		1	1	1	0	1	1	1	0	2	1	2	2		0	0	0	1	0	1	0	0	0	1	1	1	1	1	1	lysA; diaminopimelate decarboxylase [EC:4.1.1.20]
K01705	0	0	0	0	0	0		0	1	0	1	1	1	0	0	0	0	0		0	0	0	0	0	0	0	0	0	0	0	0		1	1	1	0	0	1	1	1	1	0	1	1	1	1	0	LYS4; homoaconitate hydratase [EC:4.2.1.36]
K05825	0	0	0	0	0	0		0	1	1	0	0	0	0	0	0	0	0		0	0	0	0	1	1	1	0	0	0	1	1		0	0	0	0	0	0	0	0	0	0	0	0	0	0	0	LYSN; 2-aminoadipate transaminase [EC:2.6.1.-]
K05826	0	0	0	0	0	0		0	0	0	0	0	0	0	0	0	0	0		0	0	0	0	0	0	0	0	0	0	0	0		0	0	0	0	0	0	0	0	0	0	0	0	0	0	0	lysW; alpha-aminoadipate/glutamate carrier protein LysW
K05827	0	0	0	0	0	0		0	0	0	0	0	0	0	0	0	0	0		0	0	0	0	0	0	0	0	0	0	0	0		0	0	0	2	0	0	0	0	0	0	0	0	0	0	0	lysX; [lysine-biosynthesis-protein LysW]---L-2-aminoadipate ligase [EC:6.3.2.43]
K05828	0	0	0	0	0	0		0	0	0	0	0	0	0	0	0	0	0		0	0	1	0	0	0	0	0	0	0	0	0		0	0	0	1	1	0	0	0	0	0	0	0	0	0	0	lysZ, argB; LysW-gamma-L-alpha-aminoadipate/LysW-L-glutamate kinase [EC:2.7.2.-]
K05829	0	0	0	0	0	0		0	0	0	0	0	0	0	0	0	0	0		0	0	0	0	0	0	0	0	0	0	0	0		0	0	0	1	0	0	0	0	0	0	0	0	0	0	0	lysY, argC; LysW-gamma-L-alpha-aminoadipyl-6-phosphate/LysW-L-glutamyl-5-phosphate reductase [EC:1.2.1.-]
K05830	0	0	0	0	0	0		0	0	0	0	0	0	0	0	0	0	0		0	0	1	0	0	0	0	0	0	0	0	0		0	0	0	1	1	1	1	1	1	0	1	1	1	1	1	lysJ, argD; LysW-gamma-L-lysine/LysW-L-ornithine aminotransferase [EC:2.6.1.-]
K01928	0	0	0	0	0	0		0	0	0	0	1	0	0	0	0	1	1		1	0	1	0	1	0	0	0	0	0	2	1		0	0	0	0	0	0	0	0	0	0	1	0	1	0	0	murE; UDP-N-acetylmuramoyl-L-alanyl-D-glutamate--2,6-diaminopimelate ligase [EC:6.3.2.13]
K01929	1	1	1	1	1	1		1	1	1	0	1	1	0	1	1	1	0		0	1	0	1	1	1	1	1	1	1	1	1		0	0	0	0	0	1	0	1	1	1	1	1	1	1	1	murF; UDP-N-acetylmuramoyl-tripeptide--D-alanyl-D-alanine ligase [EC:6.3.2.10]
K14157	0	0	0	0	0	0		0	0	0	0	0	0	0	0	0	0	0		0	0	0	0	1	0	0	0	0	0	0	0		0	0	0	0	0	0	0	0	0	0	0	0	0	0	0	AASS; alpha-aminoadipic semialdehyde synthase [EC:1.5.1.8 1.5.1.9]
K18201	0	0	0	0	0	0		0	1	0	0	0	0	0	0	0	0	0		1	0	0	0	0	0	0	0	0	0	0	0		0	0	0	0	0	1	1	1	1	1	1	1	1	1	0	AGPHD1; hydroxylysine kinase [EC:2.7.1.81]
K09251	1	1	1	1	2	2		0	0	0	0	0	0	0	0	0	0	0		0	0	0	0	0	0	0	0	0	0	0	0		0	0	0	0	0	0	0	0	0	0	0	0	0	0	0	patA; putrescine aminotransferase [EC:2.6.1.82]
K15736	0	0	0	0	0	0		1	1	1	0	0	0	0	0	0	0	0		0	0	0	0	0	0	1	0	0	1	1	1		0	0	0	0	0	0	0	0	0	0	0	0	0	0	0	lhgO; L-2-hydroxyglutarate oxidase [EC:1.1.5.-]
K01843	0	1	1	1	3	1		1	0	0	1	1	1	1	0	1	1	1		0	0	0	1	1	1	2	2	1	1	2	0		0	0	0	0	0	0	0	0	0	0	0	0	0	0	0	kamA; lysine 2,3-aminomutase [EC:5.4.3.2]
K18013	0	0	0	0	0	0		0	0	0	0	0	0	0	0	0	0	0		0	0	0	0	0	0	0	0	0	0	0	1		0	0	0	0	0	0	0	0	0	0	0	0	0	0	0	kce; 3-keto-5-aminohexanoate cleavage enzyme [EC:2.3.1.247]
K21672	0	1	1	0	1	1		1	0	0	1	1	1	1	0	1	0	0		0	0	0	0	0	0	0	0	0	0	0	0		0	0	0	0	0	1	1	1	1	1	1	1	1	0	1	ord; 2,4-diaminopentanoate dehydrogenase [EC:1.4.1.12 1.4.1.26]
K00824	0	1	1	1	1	1		1	0	0	0	0	0	0	1	1	1	1		0	0	0	0	0	0	0	0	0	0	0	0		0	0	0	0	0	0	0	0	0	0	0	0	0	0	0	dat; D-alanine transaminase [EC:2.6.1.21]
K00611	1	1	1	1	1	1		0	1	1	1	1	1	1	1	1	1	1		0	0	1	1	1	1	1	1	0	0	1	0		1	1	1	0	1	1	1	0	1	1	1	1	1	1	1	OTC, argF, argI; ornithine carbamoyltransferase [EC:2.1.3.3]
K09065	0	1	0	0	0	0		0	1	1	0	0	0	0	0	0	0	0		0	1	0	0	0	0	0	0	0	0	0	0		0	0	0	0	0	1	0	0	0	1	0	1	1	1	0	argF; N-acetylornithine carbamoyltransferase [EC:2.1.3.9]
K01476	2	1	2	2	1	1		0	0	0	0	0	0	0	0	0	0	0		0	0	0	0	0	0	0	0	0	0	0	0		1	1	1	1	1	2	2	1	0	2	1	2	2	2	1	E3.5.3.1, rocF, arg; arginase [EC:3.5.3.1]
K01478	0	0	0	0	0	0		0	1	1	0	0	0	0	0	0	0	0		0	0	0	0	0	0	0	0	0	0	0	0		0	0	0	0	0	0	0	0	0	0	0	0	0	0	0	arcA; arginine deiminase [EC:3.5.3.6]
K00619	0	0	0	0	0	0		0	0	0	1	1	0	0	1	1	1	1		0	0	0	0	1	1	0	1	0	0	1	1		0	0	0	0	0	0	0	0	0	0	0	0	0	0	0	argA; amino-acid N-acetyltransferase [EC:2.3.1.1]
K00620	0	0	0	0	0	0		0	0	0	0	0	0	0	1	1	1	1		0	0	0	0	1	1	1	1	0	1	2	1		0	0	0	0	0	0	0	0	0	0	0	0	0	0	0	argJ; glutamate N-acetyltransferase / amino-acid N-acetyltransferase [EC:2.3.1.35 2.3.1.1]
K00930	1	1	1	1	1	1		1	0	0	1	1	1	0	1	0	1	0		0	0	0	0	1	1	1	1	0	1	1	1		0	0	0	0	0	0	0	0	0	0	0	0	0	0	0	argB; acetylglutamate kinase [EC:2.7.2.8]
K00145	1	1	1	1	1	1		1	0	0	1	1	1	1	1	1	1	0		0	0	0	0	1	1	1	2	0	0	2	1		0	0	0	1	0	0	0	0	0	0	0	0	0	0	0	argC; N-acetyl-gamma-glutamyl-phosphate reductase [EC:1.2.1.38]
K00818	0	0	0	0	0	0		0	0	0	0	0	0	0	0	1	1	0		0	0	0	0	0	0	0	0	0	0	0	0		0	0	0	0	0	0	0	0	0	0	0	0	0	0	0	E2.6.1.11, argD; acetylornithine aminotransferase [EC:2.6.1.11]
K01438	1	2	2	2	2	2		0	0	0	0	0	0	0	0	0	0	0		0	0	0	0	0	0	0	0	0	0	0	0		0	0	0	0	0	1	0	0	0	1	0	1	1	0	0	argE; acetylornithine deacetylase [EC:3.5.1.16]
K01470	2	0	2	2	2	2		0	2	2	0	0	0	0	0	1	0	0		0	1	4	3	1	1	3	1	1	0	1	1		1	1	1	0	2	1	1	0	1	2	2	1	1	1	0	E3.5.2.10; creatinine amidohydrolase [EC:3.5.2.10]
K01473	0	0	0	0	0	0		0	0	0	0	0	0	0	0	0	0	0		0	0	0	0	0	0	0	0	0	0	0	0		0	0	0	0	0	0	0	0	0	0	0	0	0	0	0	hyuA; N-methylhydantoinase A [EC:3.5.2.14]
K01474	0	0	0	0	0	0		0	0	0	0	0	0	0	0	0	0	0		0	0	0	0	0	0	0	0	0	0	0	0		0	0	0	0	0	0	0	0	0	0	0	0	0	0	0	hyuB; N-methylhydantoinase B [EC:3.5.2.14]
K01585	1	1	1	1	1	1		0	0	0	0	0	0	0	0	0	0	0		0	0	0	0	1	0	1	0	0	0	0	0		0	0	0	0	0	0	0	0	0	0	0	0	0	0	0	speA; arginine decarboxylase [EC:4.1.1.19]
K02626	0	0	0	0	0	0		1	1	1	1	0	0	0	0	0	0	0		1	0	1	1	0	1	0	1	1	0	1	1		1	1	1	1	1	1	1	0	1	1	1	1	1	1	1	pdaD; arginine decarboxylase [EC:4.1.1.19]
K01480	2	0	0	0	0	0		0	3	2	2	0	0	0	0	0	0	0		1	0	0	1	1	1	1	1	1	0	1	1		1	1	1	1	1	3	2	1	2	2	2	2	2	2	1	speB; agmatinase [EC:3.5.3.11]
K10536	0	1	1	1	1	1		0	0	0	0	0	0	0	0	0	0	0		0	0	0	0	0	0	2	0	0	0	0	0		0	0	0	0	0	0	0	0	0	0	0	0	0	0	0	aguA; agmatine deiminase [EC:3.5.3.12]
K12251	0	1	1	1	1	1		0	0	0	0	0	0	0	0	0	0	0		0	0	0	0	0	0	0	0	0	0	0	0		0	0	0	0	0	0	0	0	0	0	0	0	0	0	0	aguB; N-carbamoylputrescine amidase [EC:3.5.1.53]
K13747	0	0	0	0	0	0		0	0	0	0	0	0	0	0	0	0	0		0	0	0	0	0	0	0	0	0	0	0	0		0	0	0	0	0	0	0	0	0	0	0	0	0	0	0	nspC; carboxynorspermidine decarboxylase [EC:4.1.1.96]
K00316	1	0	1	1	1	1		0	1	0	0	0	0	0	0	0	0	0		0	0	0	0	0	0	0	0	0	0	0	0		0	0	0	0	0	0	0	0	0	0	0	0	0	0	0	spdH; spermidine dehydrogenase [EC:1.5.99.6]
K00657	1	0	0	0	0	0		0	0	0	0	0	0	0	0	0	0	0		0	0	0	0	0	0	0	0	0	0	1	1		0	0	0	1	0	0	0	0	0	0	0	0	0	0	0	speG, SAT; diamine N-acetyltransferase [EC:2.3.1.57]
K01426	4	2	1	2	1	2		3	6	6	1	1	1	2	2	1	2	1		2	2	1	1	1	2	2	1	0	0	2	2		1	1	1	1	2	3	3	2	2	3	3	3	4	4	1	E3.5.1.4, amiE; amidase [EC:3.5.1.4]
K05526	0	0	0	0	0	0		0	1	1	0	0	0	0	0	0	0	0		0	0	0	0	0	0	0	0	0	0	0	0		0	0	0	0	0	0	0	0	0	0	0	0	0	0	0	astE; succinylglutamate desuccinylase [EC:3.5.1.96]
K09471	1	0	1	1	1	1		0	0	0	1	0	0	0	0	0	0	0		0	0	0	0	0	0	0	0	0	0	0	0		0	0	0	0	0	0	0	0	0	0	0	0	0	0	0	puuB, ordL; gamma-glutamylputrescine oxidase [EC:1.4.3.-]
K00819	1	1	1	1	1	1		1	1	1	0	0	0	0	0	0	0	0		1	0	1	1	1	1	1	1	1	1	1	1		1	1	1	1	0	1	1	0	0	1	0	1	1	0	0	rocD, OAT; ornithine--oxo-acid transaminase [EC:2.6.1.13]
K00286	1	1	1	1	1	1		1	0	0	1	1	1	1	1	1	1	1		1	0	1	0	0	1	2	2	0	1	1	2		1	1	1	1	0	1	1	1	1	1	1	1	1	1	0	proC; pyrroline-5-carboxylate reductase [EC:1.5.1.2]
K00318	0	1	1	1	1	1		0	0	0	1	1	1	0	0	0	0	0		0	0	0	0	0	0	1	1	0	0	1	0		0	0	0	1	0	0	0	0	1	0	1	1	0	1	1	PRODH, fadM, putB; proline dehydrogenase [EC:1.5.5.2]
K00931	0	0	0	0	0	0		0	0	0	0	0	0	0	0	0	0	0		0	0	1	1	0	0	1	1	1	1	1	1		0	0	0	0	0	0	0	0	0	0	0	0	0	0	0	proB; glutamate 5-kinase [EC:2.7.2.11]
K00147	1	0	0	0	0	0		0	0	0	0	0	0	0	0	0	0	0		0	0	1	1	0	0	1	1	0	0	2	2		0	0	0	0	0	0	0	0	0	0	0	0	0	0	0	proA; glutamate-5-semialdehyde dehydrogenase [EC:1.2.1.41]
K01259	1	0	0	0	0	0		0	0	0	0	0	0	0	0	0	0	0		0	0	1	0	0	0	0	0	1	0	0	0		1	1	1	0	0	1	1	0	1	0	1	1	1	1	1	pip; proline iminopeptidase [EC:3.4.11.5]
K23121	0	0	0	0	0	0		0	0	0	0	0	0	0	0	0	0	0		0	0	0	1	0	1	0	0	1	0	1	1		0	0	0	0	0	0	0	0	0	0	0	0	0	0	0	pflD; trans-4-hydroxy-L-proline dehydratase [EC:4.2.1.172]
K01777	0	0	1	1	1	1		1	1	1	0	0	0	0	0	0	0	0		0	0	0	0	1	0	0	0	0	0	0	0		0	0	0	1	1	0	0	0	0	1	0	0	0	0	0	prdF; proline racemase [EC:5.1.1.4]
K21624	0	0	0	0	0	0		0	0	0	0	0	0	0	0	0	0	0		0	0	0	0	0	0	0	0	0	0	0	0		1	1	1	0	0	0	1	1	1	0	0	0	0	0	0	c3lhypd; cis-L-3-hydroxyproline dehydratase [EC:4.2.1.171]
K09123	0	0	0	0	0	0		0	1	1	0	0	0	0	0	0	0	0		0	0	0	0	0	0	0	0	0	0	0	0		0	0	0	0	0	0	0	0	0	0	0	0	0	0	0	lhpI; cis-L-3-hydroxyproline dehydratase [EC:4.2.1.171]
K12658	1	0	0	0	0	0		0	0	0	0	0	0	0	0	0	0	0		0	0	0	0	0	0	0	0	0	0	0	0		0	0	0	1	1	0	0	0	0	0	0	0	0	0	0	lhpA; 4-hydroxyproline epimerase [EC:5.1.1.8]
K21062	1	0	0	0	0	0		0	0	0	0	0	0	0	0	0	0	0		0	0	0	0	0	0	0	0	0	0	0	0		0	0	0	1	1	0	0	0	0	0	0	0	0	0	0	lhpC; 1-pyrroline-4-hydroxy-2-carboxylate deaminase [EC:3.5.4.22]
K00765	2	1	1	1	1	1		1	0	0	1	1	1	1	1	1	2	2		0	0	2	1	1	1	1	1	1	1	1	1		1	1	1	1	0	0	0	0	0	1	1	0	0	0	0	hisG; ATP phosphoribosyltransferase [EC:2.4.2.17]
K02502	1	1	1	1	1	2		0	0	0	1	1	1	0	0	0	0	0		0	0	0	0	0	0	0	0	0	0	0	0		0	0	0	0	0	0	0	0	0	0	0	0	0	0	0	hisZ; ATP phosphoribosyltransferase regulatory subunit
K01496	1	0	0	0	0	0		0	0	0	0	1	1	1	0	1	1	1		0	0	0	0	0	0	0	0	0	0	0	0		1	2	2	0	0	0	1	2	1	1	0	0	1	0	0	hisI; phosphoribosyl-AMP cyclohydrolase [EC:3.5.4.19]
K11755	1	1	1	1	1	1		0	0	0	0	1	1	0	0	0	0	0		0	0	1	0	0	0	0	0	0	0	0	0		0	0	0	0	0	0	0	0	0	0	0	0	0	0	0	hisIE; phosphoribosyl-ATP pyrophosphohydrolase / phosphoribosyl-AMP cyclohydrolase [EC:3.6.1.31 3.5.4.19]
K01814	0	1	1	1	1	1		0	0	0	1	1	1	1	1	1	1	1		0	0	1	1	1	1	1	1	1	0	1	1		1	1	1	1	0	0	1	2	1	1	0	0	0	0	0	hisA; phosphoribosylformimino-5-aminoimidazole carboxamide ribotide isomerase [EC:5.3.1.16]
K02501	0	1	1	1	1	1		0	0	0	1	1	1	1	1	1	1	1		0	0	1	1	1	1	1	1	1	1	1	1		1	1	1	1	0	1	1	2	1	1	0	1	0	1	0	hisH; imidazole glycerol-phosphate synthase subunit HisH [EC:4.3.2.10]
K02500	1	1	0	0	1	1		0	0	0	1	1	1	1	1	1	1	1		0	0	0	1	1	1	1	2	1	1	1	1		1	1	1	0	0	1	1	2	1	1	0	1	1	1	0	hisF; imidazole glycerol-phosphate synthase subunit HisF [EC:4.3.2.10]
K01693	0	0	0	1	1	1		0	0	0	0	0	0	1	0	1	1	1		0	0	0	0	0	1	1	1	1	0	1	0		0	0	0	0	0	0	1	1	1	1	0	0	0	0	0	hisB; imidazoleglycerol-phosphate dehydratase [EC:4.2.1.19]
K00817	1	1	1	1	1	1		1	1	2	1	1	1	1	1	1	2	1		0	0	1	0	1	1	1	2	1	1	1	1		0	0	0	2	0	0	0	1	0	0	1	0	0	0	0	hisC; histidinol-phosphate aminotransferase [EC:2.6.1.9]
K05602	0	0	0	0	0	0		0	0	0	0	0	0	0	0	0	0	0		0	0	0	0	0	0	0	0	0	0	0	0		0	0	0	0	0	0	0	0	1	1	0	0	0	1	0	hisN; histidinol-phosphatase [EC:3.1.3.15]
K04486	0	0	0	0	0	0		0	0	0	0	0	0	0	0	0	0	0		1	1	0	1	1	1	1	1	1	0	0	0		0	0	0	0	0	0	0	0	0	0	0	0	0	0	0	E3.1.3.15B; histidinol-phosphatase (PHP family) [EC:3.1.3.15]
K00013	1	1	1	1	1	1		0	0	0	1	1	1	1	1	1	1	1		0	0	1	1	1	1	1	1	1	0	1	1		0	0	0	1	1	0	0	1	0	0	0	0	0	0	0	hisD; histidinol dehydrogenase [EC:1.1.1.23]
K01745	1	1	1	0	1	1		1	1	1	1	1	1	1	1	1	1	1		0	1	1	1	0	1	0	1	1	1	1	1		1	2	2	0	1	1	0	1	1	1	1	0	1	1	0	hutH, HAL; histidine ammonia-lyase [EC:4.3.1.3]
K01712	1	1	1	1	1	1		1	1	1	1	1	1	1	1	1	1	0		0	2	1	2	2	2	0	0	0	2	1	2		1	1	1	1	1	1	1	2	1	2	2	1	1	1	1	hutU, UROC1; urocanate hydratase [EC:4.2.1.49]
K01468	1	1	1	1	1	1		0	1	0	1	1	1	0	1	1	1	1		1	1	1	1	1	1	0	0	0	1	1	1		1	1	1	1	1	1	1	2	1	1	2	1	1	1	1	hutI, AMDHD1; imidazolonepropionase [EC:3.5.2.7]
K01479	0	0	0	0	0	0		0	0	0	0	0	0	0	0	0	0	0		0	0	0	0	0	1	0	0	0	0	0	0		0	0	0	0	0	0	0	0	0	0	0	0	0	0	0	hutG; formiminoglutamase [EC:3.5.3.8]
K00603	0	0	0	0	0	0		1	0	0	0	0	0	1	1	0	1	1		0	0	0	0	0	0	0	0	0	0	0	0		0	0	0	0	0	0	0	0	0	0	0	0	0	0	0	fctD; glutamate formiminotransferase / 5-formyltetrahydrofolate cyclo-ligase [EC:2.1.2.5 6.3.3.2]
K13990	1	1	1	1	1	1		1	1	1	1	1	1	1	1	0	1	1		1	0	1	1	1	1	0	0	0	1	1	1		0	0	0	0	1	0	0	0	0	0	0	0	0	0	0	FTCD; glutamate formiminotransferase / formiminotetrahydrofolate cyclodeaminase [EC:2.1.2.5 4.3.1.4]
K05603	0	0	0	0	0	0		0	0	0	0	0	0	0	0	0	0	0		0	0	0	0	0	0	0	0	0	0	0	0		0	0	0	0	0	0	0	0	0	1	1	0	0	0	0	hutF; formimidoylglutamate deiminase [EC:3.5.3.13]
K18911	0	0	0	0	0	0		0	1	1	0	0	0	0	0	0	0	0		0	0	0	0	0	0	0	0	0	0	0	0		1	1	1	0	1	1	0	0	1	1	1	0	1	1	1	egtD; L-histidine Nalpha-methyltransferase [EC:2.1.1.44]
K18912	0	0	0	2	0	0		0	1	1	0	0	0	0	0	0	0	0		0	0	0	0	0	0	0	0	0	0	0	0		0	0	0	0	0	1	0	0	1	1	1	1	1	1	0	egtB; gamma-glutamyl hercynylcysteine S-oxide synthase [EC:1.14.99.50]
K07008	1	0	0	0	0	0		0	0	0	0	0	0	0	0	0	0	0		0	0	0	0	0	0	0	0	0	0	0	0		0	0	0	0	0	0	0	0	0	0	0	0	0	0	0	egtC; gamma-glutamyl hercynylcysteine S-oxide hydrolase [EC:3.5.1.118]
K00457	0	0	0	0	0	0		0	1	1	0	0	0	0	0	0	0	0		0	0	0	0	0	0	0	0	0	0	0	0		0	0	0	0	0	0	0	0	0	0	0	0	0	0	0	HPD, hppD; 4-hydroxyphenylpyruvate dioxygenase [EC:1.13.11.27]
K00451	1	0	0	0	0	0		0	1	1	0	0	0	0	0	0	0	0		0	0	0	0	0	0	0	0	0	0	0	0		0	0	0	0	0	0	0	0	0	0	0	0	0	0	0	HGD, hmgA; homogentisate 1,2-dioxygenase [EC:1.13.11.5]
K16171	0	0	0	0	0	0		0	1	1	0	0	0	0	0	0	0	0		0	0	0	0	0	0	0	0	0	0	0	0		0	0	0	0	0	0	0	0	0	0	0	0	0	0	0	faaH; fumarylacetoacetate (FAA) hydrolase [EC:3.7.1.2]
K01826	0	0	0	0	0	0		0	1	1	0	0	0	0	0	0	0	0		0	0	0	0	0	0	0	0	0	0	0	0		0	0	0	0	0	0	0	0	0	0	0	0	0	0	0	hpaF, hpcD; 5-carboxymethyl-2-hydroxymuconate isomerase [EC:5.3.3.10]
K05921	0	0	0	0	0	0		0	0	0	1	0	0	0	0	0	0	0		0	0	0	0	0	0	0	0	0	0	0	0		0	0	0	0	0	0	0	0	0	0	0	0	0	0	0	hpaG; 5-oxopent-3-ene-1,2,5-tricarboxylate decarboxylase / 2-hydroxyhepta-2,4-diene-1,7-dioate isomerase [EC:4.1.1.68 5.3.3.-]
K02510	0	0	2	1	1	1		0	0	0	1	0	0	0	0	1	0	0		0	0	2	0	1	3	2	0	0	0	2	2		0	0	0	0	0	0	0	0	0	0	0	0	0	0	0	hpaI, hpcH; 4-hydroxy-2-oxoheptanedioate aldolase [EC:4.1.2.52]
K01668	0	0	0	0	0	0		0	0	0	0	0	0	0	0	0	0	0		0	0	0	0	0	0	0	0	0	0	1	1		0	0	0	0	0	0	0	0	0	0	0	0	0	0	0	E4.1.99.2; tyrosine phenol-lyase [EC:4.1.99.2]
K01557	0	0	0	0	0	0		0	0	0	0	0	0	0	0	0	0	0		0	0	0	1	1	0	1	0	1	0	1	1		0	0	0	0	0	0	0	0	0	0	0	0	0	0	0	FAHD1; acylpyruvate hydrolase [EC:3.7.1.5]
K07253	0	0	0	0	0	0		0	0	0	0	0	0	0	0	0	0	0		0	0	0	0	0	0	0	0	0	0	0	0		0	0	0	0	0	0	0	0	0	0	0	0	0	0	0	MIF; phenylpyruvate tautomerase [EC:5.3.2.1]
K01912	1	0	0	0	0	0		2	1	1	1	1	1	0	0	0	0	0		0	0	1	2	0	2	2	4	1	1	3	3		0	0	0	0	0	0	1	2	2	0	0	1	0	0	0	paaK; phenylacetate-CoA ligase [EC:6.2.1.30]
K02614	0	0	0	0	0	0		0	1	0	0	0	0	0	0	0	0	0		0	0	0	1	0	0	1	1	0	0	0	0		1	1	1	0	0	0	0	0	0	0	0	0	0	0	0	paaI; acyl-CoA thioesterase [EC:3.1.2.-]
K02609	1	1	1	1	1	1		0	1	0	0	0	0	0	0	0	0	0		0	0	0	0	0	0	0	0	0	0	0	0		2	2	2	0	0	1	1	0	0	1	1	1	1	1	0	paaA; ring-1,2-phenylacetyl-CoA epoxidase subunit PaaA [EC:1.14.13.149]
K02610	0	1	1	1	1	1		0	1	0	0	0	0	0	0	0	0	0		0	0	0	0	0	0	0	0	0	0	0	0		2	2	2	0	0	1	1	1	1	1	1	1	1	1	0	paaB; ring-1,2-phenylacetyl-CoA epoxidase subunit PaaB
K02611	0	0	0	0	0	0		0	1	0	0	0	0	0	0	0	0	0		0	0	0	0	0	0	0	0	0	0	0	0		1	1	1	0	0	0	0	0	0	0	0	0	0	0	0	paaC; ring-1,2-phenylacetyl-CoA epoxidase subunit PaaC [EC:1.14.13.149]
K02612	0	0	0	0	0	0		0	1	0	0	0	0	0	0	0	0	0		0	0	0	0	0	0	0	0	0	0	0	0		0	0	0	0	0	0	0	0	0	0	0	0	0	0	0	paaD; ring-1,2-phenylacetyl-CoA epoxidase subunit PaaD
K15866	0	0	1	1	0	0		0	1	0	1	1	1	0	0	0	0	0		0	0	0	0	0	0	0	0	0	0	0	0		1	1	1	0	0	0	0	0	0	0	0	0	0	0	0	paaG; 2-(1,2-epoxy-1,2-dihydrophenyl)acetyl-CoA isomerase [EC:5.3.3.18]
K02618	0	0	0	0	0	0		0	1	1	0	0	0	0	0	0	0	0		0	0	0	0	0	0	0	0	0	0	0	0		0	0	0	0	0	0	0	0	0	0	0	0	0	0	0	paaZ; oxepin-CoA hydrolase / 3-oxo-5,6-dehydrosuberyl-CoA semialdehyde dehydrogenase [EC:3.3.2.12 1.2.1.91]
K00285	0	0	0	0	0	0		0	0	0	0	0	0	0	0	0	0	0		0	0	0	0	0	0	0	0	0	0	0	0		1	1	1	1	1	0	0	0	0	0	0	0	0	0	0	dadA; D-amino-acid dehydrogenase [EC:1.4.5.1]
K03782	0	1	1	1	1	2		0	0	0	0	0	0	0	0	0	0	0		0	0	0	0	2	1	1	1	0	0	1	1		0	0	0	0	0	0	0	2	0	0	0	0	0	0	0	katG; catalase-peroxidase [EC:1.11.1.21]
K05710	1	0	1	1	1	1		1	1	1	0	0	0	0	0	0	0	0		0	0	0	1	0	0	1	2	1	1	1	1		0	0	0	1	0	0	0	0	1	1	2	1	1	0	1	hcaC; 3-phenylpropionate/trans-cinnamate dioxygenase ferredoxin component
K05712	0	0	0	0	0	0		0	0	0	0	0	0	0	0	0	0	0		0	0	0	0	0	0	0	0	0	0	0	0		0	0	0	0	0	0	0	0	1	1	0	1	0	0	0	mhpA; 3-(3-hydroxy-phenyl)propionate hydroxylase [EC:1.14.13.127]
K01666	0	0	0	0	0	0		0	0	0	0	0	0	0	0	0	0	0		0	0	0	1	0	0	0	0	1	0	0	0		0	0	0	0	0	0	0	0	0	0	0	0	0	0	0	mhpE; 4-hydroxy 2-oxovalerate aldolase [EC:4.1.3.39]
K00453	1	1	1	1	1	1		0	1	0	0	0	0	0	0	0	0	0		0	0	0	0	0	0	0	0	0	0	0	0		1	1	1	0	0	1	1	1	1	1	1	1	1	1	0	TDO2, kynA; tryptophan 2,3-dioxygenase [EC:1.13.11.11]
K00486	1	1	1	1	1	1		0	0	0	0	0	0	0	0	0	0	0		0	0	0	0	0	0	0	0	0	0	0	0		1	1	1	0	1	1	0	0	1	1	1	1	0	0	0	KMO; kynurenine 3-monooxygenase [EC:1.14.13.9]
K01556	1	1	1	1	1	1		1	1	1	0	0	0	0	0	0	0	0		0	0	1	0	1	1	2	0	0	0	0	0		1	1	1	0	1	1	0	0	1	1	1	2	0	0	0	KYNU, kynU; kynureninase [EC:3.7.1.3]
K00452	1	1	0	0	0	0		0	0	0	0	0	0	0	0	0	0	0		0	0	0	0	0	0	0	0	0	0	0	0		2	2	2	0	1	1	0	0	1	0	1	1	0	0	0	HAAO; 3-hydroxyanthranilate 3,4-dioxygenase [EC:1.13.11.6]
K03392	1	1	0	0	0	0		0	1	1	0	0	0	0	0	0	0	0		0	0	0	0	0	0	0	0	0	0	0	0		1	1	1	1	1	0	1	0	1	1	2	1	0	0	0	ACMSD; aminocarboxymuconate-semialdehyde decarboxylase [EC:4.1.1.45]
K10217	1	1	0	0	0	0		0	0	0	0	0	0	0	0	0	0	0		0	0	0	0	0	0	0	0	0	0	0	0		1	1	1	0	0	1	1	0	1	0	1	1	0	0	0	dmpC, xylG, praB; aminomuconate-semialdehyde/2-hydroxymuconate-6-semialdehyde dehydrogenase [EC:1.2.1.32 1.2.1.85]
K15067	1	1	0	0	0	0		0	0	0	0	0	0	0	0	0	0	0		0	0	0	0	0	0	0	0	0	0	0	0		1	1	1	0	1	1	0	0	1	0	1	2	0	0	0	amnD; 2-aminomuconate deaminase [EC:3.5.99.5]
K01667	0	1	1	1	1	1		0	0	0	1	1	1	0	0	0	0	0		1	1	1	0	1	1	1	0	0	1	3	3		0	0	0	0	0	0	0	0	1	0	0	0	0	0	0	tnaA; tryptophanase [EC:4.1.99.1]
K21801	0	0	0	0	0	0		0	0	0	0	0	0	0	1	0	0	0		0	0	0	0	0	0	0	0	0	0	0	0		0	0	0	0	0	0	0	0	0	0	0	0	0	0	0	iaaH; indoleacetamide hydrolase [EC:3.5.1.-]
K01626	1	1	1	1	1	1		0	1	1	0	0	0	0	0	0	0	0		0	0	0	0	0	0	2	0	0	0	0	0		0	0	0	0	0	0	0	0	0	0	0	0	0	0	0	E2.5.1.54, aroF, aroG, aroH; 3-deoxy-7-phosphoheptulonate synthase [EC:2.5.1.54]
K03856	1	0	0	0	0	0		0	1	1	1	1	1	2	1	2	2	2		1	0	1	1	1	1	1	1	1	0	1	1		1	1	1	1	2	1	1	1	0	0	1	1	1	1	0	AROA2, aroA; 3-deoxy-7-phosphoheptulonate synthase [EC:2.5.1.54]
K01735	1	1	1	1	1	0		0	1	1	1	1	1	0	0	1	1	0		1	0	0	1	1	1	1	1	1	1	1	1		1	1	1	1	0	1	0	1	1	1	1	1	1	1	0	aroB; 3-dehydroquinate synthase [EC:4.2.3.4]
K13829	0	0	0	0	0	0		0	1	1	1	1	1	0	0	0	0	0		0	0	0	0	0	0	0	0	0	0	0	0		0	0	0	0	0	0	0	0	0	0	0	0	0	0	0	aroKB; shikimate kinase / 3-dehydroquinate synthase [EC:2.7.1.71 4.2.3.4]
K03786	1	1	1	1	1	1		0	1	1	1	0	1	0	0	1	1	1		1	0	0	1	1	1	1	1	1	1	1	1		1	1	1	0	1	1	1	1	1	1	1	1	1	1	1	aroQ, qutE; 3-dehydroquinate dehydratase II [EC:4.2.1.10]
K15652	0	0	0	0	0	0		0	0	0	0	0	0	0	0	1	0	0		0	0	0	0	0	0	0	0	0	0	0	0		0	0	0	0	0	0	0	0	0	0	0	0	0	0	0	asbF; 3-dehydroshikimate dehydratase [EC:4.2.1.118]
K00014	1	1	1	0	1	1		1	1	1	1	1	1	0	0	1	1	1		1	0	0	1	1	1	1	1	1	0	1	1		1	1	1	0	0	1	1	1	1	1	1	1	1	1	1	aroE; shikimate dehydrogenase [EC:1.1.1.25]
K00891	1	1	1	1	1	1		0	1	1	2	1	1	1	1	1	3	0		0	0	0	1	1	1	1	1	1	1	1	1		1	1	1	0	1	1	1	1	1	1	0	1	0	1	1	E2.7.1.71, aroK, aroL; shikimate kinase [EC:2.7.1.71]
K00800	1	1	1	1	1	1		1	1	1	1	1	1	1	0	0	2	0		1	0	0	1	1	1	1	1	1	1	2	1		1	1	1	0	0	1	1	1	1	1	1	1	1	1	1	aroA; 3-phosphoshikimate 1-carboxyvinyltransferase [EC:2.5.1.19]
K01736	1	1	1	1	1	1		0	1	1	1	1	1	1	0	1	2	1		0	0	0	1	0	1	1	1	1	1	2	1		0	0	0	0	1	1	1	1	1	1	1	1	1	1	1	aroC; chorismate synthase [EC:4.2.3.5]
K01657	0	1	1	1	1	1		0	1	1	0	1	0	1	0	1	1	1		0	0	0	0	0	1	1	1	0	0	0	0		1	1	1	1	0	1	1	0	1	0	1	1	1	1	1	trpE; anthranilate synthase component I [EC:4.1.3.27]
K01658	1	1	1	1	1	1		0	1	1	0	1	0	1	1	1	1	1		0	0	0	0	0	1	1	1	0	0	0	0		1	1	1	1	0	1	1	1	1	0	1	1	1	1	1	trpG; anthranilate synthase component II [EC:4.1.3.27]
K00766	2	1	1	1	1	1		0	1	1	0	1	0	1	1	1	1	0		0	0	0	0	0	1	1	1	0	0	0	0		1	1	1	1	0	0	1	1	1	1	0	1	1	0	0	trpD; anthranilate phosphoribosyltransferase [EC:2.4.2.18]
K13497	0	1	1	1	1	1		0	0	0	0	0	0	0	0	0	0	0		0	0	0	0	0	0	0	0	0	0	0	0		0	0	0	0	0	0	0	0	0	0	0	0	0	0	0	trpGD; anthranilate synthase/phosphoribosyltransferase [EC:4.1.3.27 2.4.2.18]
K01817	1	2	1	2	1	1		1	0	0	0	0	0	0	1	1	1	1		0	0	0	0	0	1	1	1	0	1	0	0		1	1	1	0	1	1	1	1	1	1	1	1	1	0	0	trpF; phosphoribosylanthranilate isomerase [EC:5.3.1.24]
K01609	1	1	1	1	1	1		0	1	0	0	1	0	1	0	1	1	0		0	0	0	0	0	1	1	1	0	0	0	0		1	1	1	0	1	1	1	1	1	1	1	1	1	0	0	trpC; indole-3-glycerol phosphate synthase [EC:4.1.1.48]
K01850	0	0	0	0	0	0		0	0	0	0	0	0	0	0	0	0	0		0	0	0	0	0	0	0	0	0	0	0	0		0	0	0	0	0	0	0	0	0	0	0	0	0	0	0	E5.4.99.5; chorismate mutase [EC:5.4.99.5]
K04516	0	0	0	0	0	0		0	0	0	0	0	0	0	0	0	0	0		0	0	0	1	0	0	0	0	0	0	0	0		0	0	0	1	0	0	1	0	1	0	1	1	0	0	0	AROA1, aroA; chorismate mutase [EC:5.4.99.5]
K06208	0	0	0	0	0	0		0	1	1	1	1	1	0	0	0	0	0		0	0	0	0	0	0	0	0	0	0	0	0		0	0	0	0	0	0	0	0	0	0	0	0	0	0	0	aroH; chorismate mutase [EC:5.4.99.5]
K04517	1	0	0	0	0	0		1	0	0	1	0	0	0	0	0	1	0		1	0	1	1	1	1	1	1	1	0	1	1		1	1	1	0	1	1	1	1	0	1	1	0	1	1	0	tyrA2; prephenate dehydrogenase [EC:1.3.1.12]
K04518	1	0	1	1	1	1		1	1	1	1	1	1	1	0	0	1	1		1	0	0	1	1	1	1	0	1	1	1	1		1	1	1	1	0	0	1	0	1	1	1	1	0	0	0	pheA2; prephenate dehydratase [EC:4.2.1.51]
K01579	0	0	0	0	0	0		1	0	0	1	1	1	1	1	1	1	1		0	0	1	1	1	0	1	1	0	1	1	1		0	0	0	0	0	0	1	0	1	0	0	1	1	0	0	panD; aspartate 1-decarboxylase [EC:4.1.1.11]
K15372	0	0	0	0	0	0		0	1	1	0	0	0	0	0	0	0	0		0	0	0	0	0	0	0	0	0	0	0	0		0	0	0	0	0	0	0	0	0	0	0	0	0	0	0	toa; taurine---2-oxoglutarate transaminase [EC:2.6.1.55]
K01918	1	1	1	1	1	1		1	1	1	1	1	1	1	2	1	2	0		0	1	2	0	1	1	1	1	0	1	1	1		0	0	0	0	0	0	1	0	1	0	0	1	1	0	0	panC; pantoate--beta-alanine ligase [EC:6.3.2.1]
K00681	1	1	0	0	1	1		1	1	1	1	1	1	0	0	0	0	0		1	2	1	1	0	1	2	0	1	0	0	0		2	2	2	1	0	2	1	0	2	1	0	1	2	2	0	ggt; gamma-glutamyltranspeptidase / glutathione hydrolase [EC:2.3.2.2 3.4.19.13]
K01841	1	2	0	2	0	0		0	1	1	0	0	0	0	0	0	0	0		0	0	0	0	0	0	0	0	0	1	0	0		0	0	0	2	1	0	0	0	0	0	0	0	0	0	0	pepM; phosphoenolpyruvate phosphomutase [EC:5.4.2.9]
K09459	0	0	0	1	0	0		0	1	1	0	0	0	0	0	0	0	0		0	0	0	0	0	0	0	0	0	0	0	0		0	0	0	1	1	0	0	0	0	0	0	0	0	0	0	E4.1.1.82; phosphonopyruvate decarboxylase [EC:4.1.1.82]
K03430	0	0	0	0	0	0		0	1	1	0	0	0	0	0	0	0	0		0	0	0	0	0	0	0	0	0	0	0	0		0	0	0	0	0	0	1	0	0	0	0	0	1	0	0	phnW; 2-aminoethylphosphonate-pyruvate transaminase [EC:2.6.1.37]
K03823	0	1	1	1	1	1		0	1	1	0	0	0	0	0	0	0	0		0	0	0	1	0	0	0	0	0	0	1	1		0	0	0	1	0	0	0	1	0	0	0	0	0	0	0	pat; phosphinothricin acetyltransferase [EC:2.3.1.183]
K06167	0	0	0	0	0	0		0	0	0	0	0	0	0	0	0	0	0		0	0	0	0	0	0	0	0	0	0	0	0		0	0	0	0	1	0	0	0	1	2	0	1	1	1	0	phnP; phosphoribosyl 1,2-cyclic phosphate phosphodiesterase [EC:3.1.4.55]
K11717	1	1	1	1	1	1		1	1	1	1	1	1	0	0	0	0	0		0	0	0	1	0	0	1	2	1	1	1	1		1	1	1	0	0	1	1	0	1	1	1	1	1	0	0	sufS; cysteine desulfurase / selenocysteine lyase [EC:2.8.1.7 4.4.1.16]
K00384	1	1	1	1	1	1		0	1	1	2	2	2	1	1	1	1	0		2	0	1	1	1	1	1	1	1	0	1	1		1	1	1	1	0	1	0	0	1	1	1	1	1	1	0	trxB, TRR; thioredoxin reductase (NADPH) [EC:1.8.1.9]
K12527	0	0	0	0	0	0		0	0	0	1	1	1	0	0	0	0	0		0	0	0	0	0	0	0	0	0	0	0	0		0	0	0	0	0	0	0	0	0	0	0	0	0	0	0	ygfK; putative selenate reductase [EC:1.97.1.9]
K01008	1	1	1	1	1	1		0	1	1	1	1	1	0	0	0	0	0		1	1	2	0	2	3	0	2	2	2	2	2		1	2	2	2	1	2	1	0	1	1	2	2	1	2	0	selD, SEPHS; selenide, water dikinase [EC:2.7.9.3]
K01042	1	1	2	1	1	1		1	1	0	1	1	0	0	0	0	0	0		0	0	1	1	1	1	2	1	1	1	1	1		1	1	1	0	1	1	0	0	0	1	1	1	1	1	1	selA; L-seryl-tRNA(Ser) seleniumtransferase [EC:2.9.1.1]
K01874	2	1	1	1	1	1		1	1	1	1	1	1	0	1	1	1	0		1	1	1	1	1	1	1	0	1	1	1	1		1	1	1	1	0	1	1	1	1	1	1	1	2	1	2	MARS, metG; methionyl-tRNA synthetase [EC:6.1.1.10]
K22210	0	0	0	0	0	0		0	0	0	0	0	0	0	0	0	0	0		0	0	1	0	0	0	0	0	0	0	0	0		0	0	0	0	0	0	0	0	0	0	0	0	0	0	0	DGLUCY; D-glutamate cyclase [EC:4.2.1.48]
K01776	0	0	0	0	0	0		0	0	0	0	0	0	0	0	0	0	0		1	0	0	0	1	0	0	0	0	0	1	1		0	0	0	0	0	0	0	0	0	0	0	0	0	0	0	murI; glutamate racemase [EC:5.1.1.3]
K01924	1	1	1	1	1	1		1	0	0	1	2	1	1	0	1	1	2		0	0	1	1	1	0	0	1	1	1	1	1		1	1	1	1	1	1	1	1	1	1	1	1	0	1	1	murC; UDP-N-acetylmuramate--alanine ligase [EC:6.3.2.8]
K01925	0	0	0	0	0	0		0	0	0	0	1	0	1	0	0	1	1		0	0	0	0	0	0	0	0	0	1	0	0		1	1	1	0	0	0	0	0	0	0	1	0	0	0	0	murD; UDP-N-acetylmuramoylalanine--D-glutamate ligase [EC:6.3.2.9]
K21898	0	0	0	0	0	0		0	0	0	0	0	0	0	0	0	0	0		0	0	0	0	0	0	0	0	0	0	0	0		0	0	0	0	0	0	0	0	0	0	0	1	0	0	0	orr; ornithine racemase [EC:5.1.1.12]
K01775	2	2	3	2	2	2		3	2	2	1	1	1	1	1	1	1	1		0	1	2	2	2	1	1	3	2	0	2	1		2	2	2	3	1	3	2	3	2	2	3	2	2	2	1	alr; alanine racemase [EC:5.1.1.1]
K01921	4	4	4	4	4	4		1	1	1	1	1	1	1	1	1	1	0		0	0	1	2	2	1	2	3	1	2	3	1		1	1	1	0	1	1	0	0	1	1	1	1	1	1	1	ddl; D-alanine-D-alanine ligase [EC:6.3.2.4]
K14188	1	0	0	0	0	1		0	0	0	0	0	0	0	0	0	0	0		0	0	0	0	0	0	0	0	0	0	1	0		0	0	0	0	0	0	0	0	0	0	0	0	0	0	0	dltC; D-alanine--poly(phosphoribitol) ligase subunit 2 [EC:6.1.1.13]
K01469	0	0	0	0	0	0		0	1	0	0	0	0	0	0	0	0	0		0	0	0	0	0	0	0	0	0	0	0	0		0	0	0	0	0	0	0	0	0	0	0	0	0	0	0	OPLAH, OXP1, oplAH; 5-oxoprolinase (ATP-hydrolysing) [EC:3.5.2.9]
K07160	1	0	0	0	0	0		0	0	0	0	0	0	0	0	0	0	0		0	0	0	0	0	0	0	0	0	0	0	0		0	0	0	0	0	0	0	0	0	0	0	0	0	0	0	pxpA; 5-oxoprolinase (ATP-hydrolysing) subunit A [EC:3.5.2.9]
K06048	1	1	1	1	1	1		0	1	1	0	0	0	0	0	0	0	0		0	0	0	0	0	0	0	0	0	0	0	0		1	1	1	2	1	1	1	0	1	0	1	1	0	1	0	gshA, ybdK; glutamate---cysteine ligase / carboxylate-amine ligase [EC:6.3.2.2 6.3.-.-]
K01255	1	1	1	1	1	1		1	1	1	1	0	0	0	0	0	0	0		0	0	0	0	0	0	0	0	0	0	0	0		1	1	1	1	0	0	0	0	0	0	0	0	0	0	0	CARP, pepA; leucyl aminopeptidase [EC:3.4.11.1]
K01256	0	0	0	0	0	0		0	1	1	0	0	0	0	0	0	0	0		0	0	0	0	0	0	0	0	0	0	0	0		0	0	0	0	0	1	0	0	0	0	1	1	0	0	0	pepN; aminopeptidase N [EC:3.4.11.2]
K01270	1	1	1	1	1	1		1	1	1	1	1	1	0	0	0	0	0		1	0	1	1	1	1	1	1	0	0	1	1		1	1	1	1	1	1	0	0	1	1	1	1	1	1	1	pepD; dipeptidase D [EC:3.4.13.-]
K00799	0	0	0	0	0	0		0	0	0	0	0	0	0	0	0	0	0		0	0	0	0	0	0	0	0	0	0	0	0		0	0	0	0	0	0	0	0	0	0	0	0	0	0	0	GST, gst; glutathione S-transferase [EC:2.5.1.18]
K00721	1	1	1	1	1	0		2	1	1	1	1	1	1	1	1	1	1		0	2	1	1	1	2	2	1	1	1	2	2		1	1	1	0	0	1	1	1	1	1	1	1	2	1	1	DPM1; dolichol-phosphate mannosyltransferase [EC:2.4.1.83]
K01230	0	0	0	0	0	0		0	0	0	0	0	0	0	0	0	0	0		0	0	0	0	0	0	0	0	0	0	0	0		0	0	0	0	0	0	0	0	0	0	0	0	0	0	0	MAN1; mannosyl-oligosaccharide alpha-1,2-mannosidase [EC:3.2.1.113]
K14459	0	0	0	0	0	0		0	0	0	0	0	0	0	0	1	0	0		0	0	1	0	0	0	1	0	0	0	0	0		0	0	0	0	0	0	0	0	0	0	0	0	0	0	0	HEX; hexosaminidase [EC:3.2.1.52]
K09667	0	0	0	0	0	0		0	0	0	0	0	0	0	0	0	0	0		0	0	0	0	0	0	0	0	0	0	0	0		0	0	0	0	0	0	0	1	0	0	0	0	1	0	0	OGT; protein O-GlcNAc transferase [EC:2.4.1.255]
K00771	0	0	0	0	0	0		0	0	0	0	0	0	0	0	0	0	0		0	0	0	0	0	1	0	0	0	0	0	0		0	0	0	0	0	0	0	0	0	0	0	0	0	0	0	XYLT; protein xylosyltransferase [EC:2.4.2.26]
K01136	0	0	0	0	0	0		0	0	0	0	0	0	0	0	0	0	0		0	0	2	0	0	3	7	2	0	0	1	1		0	0	0	0	0	0	0	0	0	0	0	0	0	0	0	IDS; iduronate 2-sulfatase [EC:3.1.6.13]
K01565	0	0	0	0	0	0		0	0	0	0	0	0	0	0	0	0	0		0	0	1	0	0	0	0	0	0	0	0	0		0	0	0	0	0	0	0	0	0	0	0	0	0	0	0	SGSH; N-sulfoglucosamine sulfohydrolase [EC:3.10.1.1]
K10532	1	2	0	2	0	0		1	0	0	1	0	0	0	0	0	0	0		2	0	1	3	1	2	0	1	1	0	3	2		1	1	1	0	0	0	0	0	1	1	0	0	0	0	0	HGSNAT; heparan-alpha-glucosaminide N-acetyltransferase [EC:2.3.1.78]
K01205	0	0	0	0	0	0		0	0	0	0	0	0	0	0	0	0	0		0	0	0	0	0	0	0	0	0	0	0	0		0	0	0	0	0	0	0	0	0	0	0	0	0	0	0	NAGLU; alpha-N-acetylglucosaminidase [EC:3.2.1.50]
K00677	1	1	1	1	1	0		1	1	1	1	1	1	1	1	1	1	1		1	1	1	1	1	1	1	1	1	0	1	1		0	0	0	0	0	0	0	0	0	0	0	0	0	0	0	lpxA; UDP-N-acetylglucosamine acyltransferase [EC:2.3.1.129]
K02535	0	1	1	1	1	1		0	0	0	0	0	0	0	0	0	0	0		0	0	0	0	0	0	0	0	0	0	0	0		0	0	0	0	0	0	0	0	0	0	0	0	0	0	0	lpxC; UDP-3-O-[3-hydroxymyristoyl] N-acetylglucosamine deacetylase [EC:3.5.1.108]
K02536	1	2	1	1	1	1		1	1	1	1	1	1	1	1	1	1	1		1	1	1	1	1	1	1	1	1	0	1	1		0	0	0	0	0	0	0	0	0	0	0	0	0	0	0	lpxD; UDP-3-O-[3-hydroxymyristoyl] glucosamine N-acyltransferase [EC:2.3.1.191]
K03269	1	1	1	1	1	1		1	1	1	1	1	1	1	0	1	1	0		1	1	1	2	1	1	1	1	1	1	1	1		0	0	0	1	1	1	1	1	1	1	1	1	1	1	1	lpxH; UDP-2,3-diacylglucosamine hydrolase [EC:3.6.1.54]
K00748	1	1	1	1	1	1		0	1	1	1	1	1	1	0	1	0	1		1	0	1	1	1	1	1	1	1	1	1	1		0	0	0	0	0	0	0	0	0	0	0	0	1	0	0	lpxB; lipid-A-disaccharide synthase [EC:2.4.1.182]
K00912	1	1	2	1	1	1		1	1	1	1	1	1	1	0	1	1	1		1	1	1	1	1	1	1	1	1	1	1	1		0	0	0	0	0	0	0	0	0	0	0	0	1	0	0	lpxK; tetraacyldisaccharide 4'-kinase [EC:2.7.1.130]
K06041	0	1	1	1	1	1		0	1	1	1	1	1	1	1	1	1	1		0	1	0	1	1	1	1	3	1	1	0	0		0	0	0	0	0	0	0	0	0	0	0	0	0	0	0	kdsD, kpsF; arabinose-5-phosphate isomerase [EC:5.3.1.13]
K01627	0	1	1	1	1	0		1	1	1	1	1	1	0	1	1	1	1		0	1	1	1	1	1	2	2	1	1	0	0		0	0	0	0	0	0	0	0	0	0	0	0	0	0	0	kdsA; 2-dehydro-3-deoxyphosphooctonate aldolase (KDO 8-P synthase) [EC:2.5.1.55]
K03270	0	0	0	0	0	0		1	0	0	0	0	0	0	0	0	0	0		0	1	0	0	0	0	0	2	0	0	0	0		1	1	1	0	0	0	0	0	0	0	0	1	0	0	0	kdsC; 3-deoxy-D-manno-octulosonate 8-phosphate phosphatase (KDO 8-P phosphatase) [EC:3.1.3.45]
K00979	1	1	1	1	1	1		1	1	1	1	1	1	0	1	0	1	1		0	1	1	1	1	1	3	2	0	1	2	2		0	0	0	0	0	0	0	0	0	0	0	0	0	0	0	kdsB; 3-deoxy-manno-octulosonate cytidylyltransferase (CMP-KDO synthetase) [EC:2.7.7.38]
K02527	0	2	1	1	1	1		0	1	1	1	1	0	1	1	0	1	1		0	1	1	1	1	1	2	1	1	1	1	1		0	0	0	0	0	0	0	0	0	0	0	0	0	0	0	kdtA, waaA; 3-deoxy-D-manno-octulosonic-acid transferase [EC:2.4.99.12 2.4.99.13 2.4.99.14 2.4.99.15]
K02517	2	2	2	2	2	2		1	1	1	2	2	2	2	1	1	1	0		1	2	2	1	2	1	2	1	1	0	2	2		0	0	0	0	0	0	1	0	0	0	0	0	0	0	0	lpxL, htrB; Kdo2-lipid IVA lauroyltransferase/acyltransferase [EC:2.3.1.241 2.3.1.-]
K09778	0	1	1	1	1	1		0	1	1	1	1	1	1	0	1	1	1		1	0	1	2	1	2	1	1	1	1	1	1		0	0	0	0	0	0	0	0	0	0	0	0	1	0	0	lpxJ; Kdo2-lipid IVA 3' secondary acyltransferase [EC:2.3.1.-]
K03271	1	1	2	1	2	2		1	1	1	1	2	1	0	1	2	0	2		0	0	2	1	1	1	1	1	1	2	1	1		0	0	0	1	1	0	0	0	0	0	0	0	0	0	0	gmhA, lpcA; D-sedoheptulose 7-phosphate isomerase [EC:5.3.1.28]
K03272	0	0	0	0	0	0		0	0	0	0	0	0	0	0	0	0	0		0	0	0	0	0	0	1	0	0	0	1	1		0	0	0	0	0	0	0	0	0	0	0	0	0	0	0	gmhC, hldE, waaE, rfaE; D-beta-D-heptose 7-phosphate kinase / D-beta-D-heptose 1-phosphate adenosyltransferase [EC:2.7.1.167 2.7.7.70]
K03273	1	1	1	1	1	1		1	1	1	1	1	1	0	1	0	0	0		0	0	1	1	1	1	1	1	0	1	0	0		1	1	1	1	1	0	0	0	0	0	0	0	0	0	0	gmhB; D-glycero-D-manno-heptose 1,7-bisphosphate phosphatase [EC:3.1.3.82 3.1.3.83]
K03274	0	0	0	0	0	0		0	0	0	0	0	0	0	0	0	0	0		0	0	0	0	0	0	0	0	0	0	0	0		1	1	1	0	0	0	0	0	0	0	0	0	0	0	0	gmhD, rfaD; ADP-L-glycero-D-manno-heptose 6-epimerase [EC:5.1.3.20]
K07031	0	0	0	0	0	0		0	0	0	0	1	0	0	0	1	0	1		0	0	1	0	0	1	0	0	0	1	0	1		1	1	1	1	1	0	0	0	0	0	0	0	0	0	0	hddA; D-glycero-alpha-D-manno-heptose-7-phosphate kinase [EC:2.7.1.168]
K15669	0	0	0	0	0	0		0	0	0	0	0	0	0	0	0	0	0		0	0	0	0	0	1	0	0	0	0	0	0		1	1	1	1	1	0	0	0	0	0	0	0	0	0	0	hddC; D-glycero-alpha-D-manno-heptose 1-phosphate guanylyltransferase [EC:2.7.7.71]
K02841	0	1	1	1	1	1		0	0	0	1	1	1	1	2	3	2	0		0	0	0	0	1	1	1	0	0	1	1	1		0	0	0	0	0	0	0	0	0	0	0	0	0	0	0	waaC, rfaC; heptosyltransferase I [EC:2.4.-.-]
K02843	1	4	4	3	4	3		0	1	1	4	3	2	3	4	3	3	2		1	0	1	3	4	4	3	2	2	3	3	3		0	0	0	0	0	0	0	0	0	0	0	0	0	0	0	waaF, rfaF; heptosyltransferase II [EC:2.4.-.-]
K19353	0	0	0	0	0	0		0	0	0	0	0	0	0	0	0	0	0		0	0	0	0	0	0	0	0	0	0	0	0		0	0	0	0	0	0	0	1	0	0	1	0	0	0	0	eptC; heptose-I-phosphate ethanolaminephosphotransferase [EC:2.7.8.-]
K02847	1	0	0	0	0	0		0	0	0	1	0	0	1	1	1	1	1		0	0	0	0	0	1	0	0	0	1	0	1		0	0	0	0	0	0	0	0	1	1	0	0	0	0	0	waaL, rfaL; O-antigen ligase [EC:2.4.1.-]
K06153	0	1	1	1	1	1		1	1	1	1	1	1	0	1	1	1	0		0	0	0	1	1	1	1	1	1	0	1	1		1	1	1	0	0	1	1	0	1	1	0	0	1	1	0	bacA; undecaprenyl-diphosphatase [EC:3.6.1.27]
K19302	1	2	0	1	1	1		1	1	1	1	2	2	2	1	1	2	1		0	0	1	2	0	3	2	3	2	1	0	0		0	0	0	0	0	0	0	0	0	0	0	0	0	0	0	bcrC; undecaprenyl-diphosphatase [EC:3.6.1.27]
K01000	1	1	2	1	1	1		1	1	1	1	1	1	0	1	1	1	1		1	1	0	1	1	1	1	1	1	1	1	1		1	1	1	1	0	1	0	2	1	1	0	1	1	1	1	mraY; phospho-N-acetylmuramoyl-pentapeptide-transferase [EC:2.7.8.13]
K02563	1	1	1	1	1	1		1	1	1	1	1	1	0	0	1	1	1		0	0	1	1	1	1	1	1	1	1	1	1		1	1	1	1	0	1	0	1	1	1	1	2	1	1	1	murG; UDP-N-acetylglucosamine--N-acetylmuramyl-(pentapeptide) pyrophosphoryl-undecaprenol N-acetylglucosamine transferase [EC:2.4.1.227]
K03814	1	1	0	1	1	1		0	0	0	0	0	0	0	0	0	0	0		0	0	0	1	1	0	0	0	0	1	1	1		0	0	0	0	0	0	0	0	0	0	0	0	0	0	0	mtgA; monofunctional glycosyltransferase [EC:2.4.1.129]
K05366	2	1	2	2	2	2		1	1	1	1	1	1	1	0	0	1	1		2	1	2	2	2	2	2	2	2	2	2	2		0	0	0	1	1	1	1	0	1	1	1	0	1	0	1	mrcA; penicillin-binding protein 1A [EC:2.4.1.129 3.4.16.4]
K05367	1	0	0	0	0	0		0	1	0	1	0	0	0	0	0	0	0		0	0	0	1	1	1	1	0	0	2	1	1		0	0	0	1	0	0	0	0	0	0	0	0	0	0	0	pbpC; penicillin-binding protein 1C [EC:2.4.1.129]
K05515	1	1	1	1	1	1		1	1	1	1	1	1	1	0	1	1	1		1	1	1	0	1	1	1	0	0	1	1	1		1	1	1	0	1	1	1	1	1	1	1	1	1	1	1	mrdA; penicillin-binding protein 2 [EC:3.4.16.4]
K03587	1	1	1	1	1	1		1	1	1	1	1	1	0	1	1	1	0		0	1	0	0	1	1	1	1	0	1	1	1		1	1	1	0	1	1	0	1	1	0	0	1	1	1	1	ftsI; cell division protein FtsI (penicillin-binding protein 3) [EC:3.4.16.4]
K05364	0	0	0	0	0	0		0	0	0	0	0	0	0	0	0	0	0		0	0	0	0	0	0	0	0	0	0	0	0		0	0	0	0	0	0	0	0	0	0	0	0	0	0	0	pbpA; penicillin-binding protein A
K07259	2	2	1	0	1	1		3	1	1	2	2	2	0	0	0	0	0		1	0	2	1	1	1	1	0	0	0	1	1		1	1	1	1	0	1	1	0	1	1	1	1	1	1	1	dacB; serine-type D-Ala-D-Ala carboxypeptidase/endopeptidase (penicillin-binding protein 4) [EC:3.4.16.4 3.4.21.-]
K21469	0	1	1	1	1	1		1	1	1	1	1	1	0	0	0	0	0		0	0	1	0	1	1	1	0	0	0	1	1		1	1	1	0	0	0	0	0	1	1	0	0	0	0	0	pbp4b; serine-type D-Ala-D-Ala carboxypeptidase [EC:3.4.16.4]
K07260	0	0	0	0	0	0		0	0	0	0	0	0	0	0	0	0	0		0	0	0	0	0	0	0	0	0	0	0	0		1	1	1	0	0	0	0	0	0	0	1	0	0	0	0	vanY; zinc D-Ala-D-Ala carboxypeptidase [EC:3.4.17.14]
K01191	1	1	1	1	1	0		1	0	0	2	1	1	0	3	2	0	1		1	0	0	1	1	2	3	0	0	1	9	9		0	0	0	0	0	0	0	0	0	0	0	0	0	0	0	MAN2C1; alpha-mannosidase [EC:3.2.1.24]
K01192	1	2	1	2	1	1		1	1	1	0	1	1	0	0	0	0	0		0	1	1	1	0	0	0	0	0	0	2	2		0	0	0	0	0	0	0	0	0	0	0	0	0	0	0	E3.2.1.25, MANBA, manB; beta-mannosidase [EC:3.2.1.25]
K01206	2	0	1	1	1	1		1	1	0	2	0	0	0	0	1	0	0		1	0	2	11	1	0	8	13	5	1	6	7		0	0	0	0	0	0	0	0	0	0	0	0	0	0	0	FUCA; alpha-L-fucosidase [EC:3.2.1.51]
K15923	0	0	0	0	0	0		0	1	0	0	0	0	0	0	0	0	0		0	0	0	2	0	0	3	1	1	1	2	2		0	0	0	0	0	0	0	0	0	0	0	0	0	0	0	AXY8, FUC95A, afcA; alpha-L-fucosidase 2 [EC:3.2.1.51]
K01444	1	1	1	1	1	1		0	1	1	0	0	0	0	0	0	0	0		0	0	1	0	0	2	0	1	0	0	1	1		1	1	1	0	0	1	1	1	1	1	1	1	1	0	1	AGA, aspG; N4-(beta-N-acetylglucosaminyl)-L-asparaginase [EC:3.5.1.26]
K08256	0	0	0	0	0	0		0	0	0	0	0	0	0	0	1	1	1		0	0	0	0	0	0	0	0	0	0	0	0		0	0	0	0	0	0	0	0	0	0	0	0	0	0	0	pimA; phosphatidyl-myo-inositol alpha-mannosyltransferase [EC:2.4.1.345]
K13668	0	0	0	0	0	0		1	1	0	0	0	0	0	0	0	0	0		0	0	0	0	0	0	0	0	0	0	0	0		0	0	0	0	0	0	0	0	0	0	0	0	0	0	0	pimB; phosphatidyl-myo-inositol dimannoside synthase [EC:2.4.1.346]
K14335	0	0	0	0	0	0		0	0	0	0	0	0	0	0	0	0	0		0	0	1	1	0	1	1	0	0	0	0	0		0	0	0	0	0	0	0	0	0	0	0	0	0	0	0	pimC; alpha-1,6-mannosyltransferase [EC:2.4.1.-]
K13687	0	0	0	0	0	0		0	0	0	0	0	0	0	0	0	0	0		0	0	0	0	0	1	0	0	0	0	0	0		0	0	0	0	0	0	0	0	0	0	0	0	0	0	0	aftB; arabinofuranosyltransferase [EC:2.4.2.-]
K02851	1	1	1	1	1	1		0	1	0	1	1	1	1	1	2	2	2		0	0	0	1	2	2	3	3	1	0	1	1		2	2	2	0	0	1	0	0	0	1	0	0	0	1	0	wecA, tagO, rfe; UDP-GlcNAc:undecaprenyl-phosphate/decaprenyl-phosphate GlcNAc-1-phosphate transferase [EC:2.7.8.33 2.7.8.35]
K16870	1	2	1	1	1	1		0	0	0	0	0	0	0	0	0	0	0		0	0	0	0	0	0	0	0	0	0	0	0		0	0	0	0	0	0	0	0	0	0	0	0	0	0	0	wbbL; N-acetylglucosaminyl-diphospho-decaprenol L-rhamnosyltransferase [EC:2.4.1.289]
K03147	0	0	0	0	0	0		1	0	0	0	0	0	0	0	0	1	0		0	0	0	0	0	0	0	0	0	0	0	0		0	0	0	2	0	1	1	0	0	1	1	1	1	0	0	thiC; phosphomethylpyrimidine synthase [EC:4.1.99.17]
K00941	0	0	0	0	0	0		1	0	0	0	0	0	0	0	1	1	0		0	0	1	0	0	0	0	1	1	0	0	0		1	1	1	1	1	0	1	0	1	1	1	1	1	1	1	thiD; hydroxymethylpyrimidine/phosphomethylpyrimidine kinase [EC:2.7.1.49 2.7.4.7]
K04487	1	1	2	2	2	2		0	2	2	0	1	1	0	0	0	1	0		1	1	2	1	2	2	1	2	2	2	2	2		3	3	3	1	1	2	1	1	1	1	2	2	1	2	1	iscS, NFS1; cysteine desulfurase [EC:2.8.1.7]
K03151	0	1	1	1	1	1		1	1	1	0	0	0	0	0	0	0	0		0	1	0	1	0	0	0	1	1	0	0	0		1	1	1	0	0	1	1	1	0	1	1	1	1	1	1	thiI; tRNA uracil 4-sulfurtransferase [EC:2.8.1.4]
K03150	0	0	0	0	0	0		1	0	0	0	0	0	0	0	0	0	0		0	0	0	0	0	1	0	0	0	0	0	0		0	0	0	0	0	0	0	0	0	0	0	0	0	0	0	thiH; 2-iminoacetate synthase [EC:4.1.99.19]
K03153	0	0	0	0	0	0		0	0	0	0	0	0	0	0	0	0	0		0	0	0	0	0	0	0	0	0	0	0	0		0	0	0	1	1	0	0	0	0	0	0	0	0	0	0	thiO; glycine oxidase [EC:1.4.3.19]
K01662	0	0	0	0	0	0		0	0	0	1	1	1	1	1	1	1	1		1	0	0	1	1	1	2	0	1	1	1	1		0	0	0	1	1	0	0	0	0	0	0	0	0	0	0	dxs; 1-deoxy-D-xylulose-5-phosphate synthase [EC:2.2.1.7]
K03149	0	0	0	0	0	0		1	0	0	0	0	0	0	0	0	0	0		0	0	0	0	0	0	0	0	0	0	0	0		0	0	0	1	0	1	1	0	0	1	1	1	1	1	0	thiG; thiazole synthase [EC:2.8.1.10]
K22699	0	0	0	0	0	0		0	0	0	0	0	0	0	0	0	0	0		0	0	0	0	0	0	0	0	0	0	0	0		0	0	0	0	0	0	0	0	0	0	0	0	0	0	0	thi4; sulfide-dependent adenosine diphosphate thiazole synthase [EC:2.4.2.59]
K00878	0	0	0	0	0	0		0	0	0	0	0	0	0	0	0	0	0		0	0	0	1	0	0	0	1	1	0	0	0		0	0	0	0	0	0	0	0	0	0	0	0	0	0	0	thiM; hydroxyethylthiazole kinase [EC:2.7.1.50]
K00788	0	0	0	0	0	0		0	0	0	0	0	0	0	0	1	1	0		0	0	1	1	0	0	0	1	1	0	0	0		1	1	1	2	1	2	2	0	2	1	1	3	2	1	1	thiE; thiamine-phosphate pyrophosphorylase [EC:2.5.1.3]
K00946	0	0	0	0	0	0		0	0	0	1	1	1	1	1	1	1	1		1	1	1	0	0	1	0	1	1	0	0	0		1	1	1	1	0	1	1	0	1	0	0	1	0	0	0	thiL; thiamine-monophosphate kinase [EC:2.7.4.16]
K06949	2	2	3	3	2	1		0	1	1	0	0	0	0	0	0	0	0		0	0	0	2	1	2	2	1	1	1	1	1		1	1	1	0	1	1	1	1	1	1	1	1	1	1	0	rsgA, engC; ribosome biogenesis GTPase / thiamine phosphate phosphatase [EC:3.6.1.- 3.1.3.100]
K01077	0	1	1	1	1	1		1	1	1	0	0	0	0	0	0	0	0		0	0	1	1	2	2	2	1	0	1	1	2		1	1	1	0	0	1	0	1	0	0	1	1	1	1	1	E3.1.3.1, phoA, phoB; alkaline phosphatase [EC:3.1.3.1]
K00949	1	1	2	0	1	1		1	1	1	1	1	2	0	0	0	0	0		0	0	0	0	1	0	1	0	0	1	1	1		0	0	0	0	0	0	0	0	0	0	0	0	0	0	0	thiN, TPK1, THI80; thiamine pyrophosphokinase [EC:2.7.6.2]
K03707	0	0	0	0	0	0		0	0	0	0	0	0	0	0	0	0	0		0	0	1	0	0	0	0	1	1	0	0	0		1	1	1	0	0	0	0	0	0	0	0	0	0	0	0	tenA; thiaminase (transcriptional activator TenA) [EC:3.5.99.2]
K20896	0	0	0	0	0	0		0	0	0	0	0	0	0	0	0	0	0		0	0	0	0	0	0	0	0	0	0	0	0		2	2	2	0	0	0	0	0	0	0	0	0	0	0	0	TENA_E; formylaminopyrimidine deformylase / aminopyrimidine aminohydrolase [EC:3.5.1.- 3.5.99.-]
K01497	1	0	1	1	1	1		1	0	0	1	0	0	0	0	0	0	0		0	0	1	0	0	0	0	1	0	1	0	0		1	1	1	0	0	0	1	1	1	1	0	0	0	0	0	ribA, RIB1; GTP cyclohydrolase II [EC:3.5.4.25]
K14652	1	1	1	1	1	1		1	1	1	1	1	1	0	1	1	2	0		1	0	1	1	1	1	1	1	1	1	1	1		1	1	1	0	0	1	1	1	1	1	1	1	0	0	0	ribBA; 3,4-dihydroxy 2-butanone 4-phosphate synthase / GTP cyclohydrolase II [EC:4.1.99.12 3.5.4.25]
K11752	1	1	1	1	1	1		1	1	1	1	1	1	1	0	1	1	0		1	1	0	1	1	1	1	1	1	1	1	1		1	1	1	0	1	1	1	0	1	1	1	1	0	1	0	ribD; diaminohydroxyphosphoribosylaminopyrimidine deaminase / 5-amino-6-(5-phosphoribosylamino)uracil reductase [EC:3.5.4.26 1.1.1.193]
K02858	0	0	0	0	0	0		0	0	0	0	0	0	0	0	0	1	0		0	0	0	0	0	0	0	0	0	0	0	0		0	0	0	0	0	0	0	0	0	0	0	0	0	0	0	ribB, RIB3; 3,4-dihydroxy 2-butanone 4-phosphate synthase [EC:4.1.99.12]
K00794	1	1	1	1	1	1		1	1	1	1	1	1	0	1	1	1	0		1	0	1	1	1	1	1	1	1	1	1	1		1	1	1	0	0	1	1	1	1	1	1	1	0	0	0	ribH, RIB4; 6,7-dimethyl-8-ribityllumazine synthase [EC:2.5.1.78]
K00793	1	1	1	1	1	1		2	1	1	1	1	1	0	1	1	1	0		1	1	0	1	1	1	1	1	1	1	1	1		1	1	1	0	1	1	1	1	1	1	1	1	0	0	0	ribE, RIB5; riboflavin synthase [EC:2.5.1.9]
K11753	1	1	1	1	1	1		1	1	1	1	1	1	1	1	1	1	1		1	0	0	1	1	1	1	1	1	1	1	1		1	1	1	1	1	1	1	1	1	1	1	1	1	0	1	ribF; riboflavin kinase / FMN adenylyltransferase [EC:2.7.1.26 2.7.7.2]
K03788	0	0	0	0	0	0		0	0	0	0	0	0	0	0	0	0	0		0	0	0	0	0	0	0	0	0	0	0	0		0	0	0	0	0	0	0	0	0	0	0	0	0	0	0	aphA; acid phosphatase (class B) [EC:3.1.3.2]
K14379	2	2	3	2	3	3		0	1	1	0	0	0	0	0	0	0	0		0	0	1	0	1	0	0	0	0	0	0	0		1	1	1	1	0	0	1	0	1	1	1	0	0	1	1	ACP5; tartrate-resistant acid phosphatase type 5 [EC:3.1.3.2]
K00275	1	1	1	1	1	1		1	1	1	0	0	0	0	0	0	0	0		0	0	1	0	0	0	0	0	0	0	0	0		1	1	1	1	1	1	1	0	1	1	1	1	1	1	0	pdxH, PNPO; pyridoxamine 5'-phosphate oxidase [EC:1.4.3.5]
K05275	2	0	0	1	0	0		1	1	1	2	1	2	0	1	1	0	0		0	0	0	0	0	0	0	0	0	0	1	1		0	0	0	0	0	0	0	0	0	0	0	0	0	0	0	E1.1.1.65; pyridoxine 4-dehydrogenase [EC:1.1.1.65]
K03473	0	1	1	1	1	1		1	1	0	1	1	1	1	1	1	1	0		0	0	0	0	0	0	0	0	0	0	0	0		1	1	1	1	0	0	0	0	0	0	0	0	0	0	0	pdxB; erythronate-4-phosphate dehydrogenase [EC:1.1.1.290]
K00097	1	1	0	1	1	1		0	1	1	1	0	0	0	1	1	1	1		0	0	0	0	0	0	0	0	0	0	0	0		1	1	1	0	0	1	1	0	1	1	1	1	0	1	1	pdxA; 4-hydroxythreonine-4-phosphate dehydrogenase [EC:1.1.1.262]
K03474	1	1	1	1	1	1		1	1	1	1	1	1	1	1	1	1	1		1	0	1	1	1	1	1	0	1	1	1	1		2	2	2	1	2	1	0	1	1	1	1	1	1	1	0	pdxJ; pyridoxine 5-phosphate synthase [EC:2.6.99.2]
K06215	0	0	0	0	0	0		0	0	0	0	0	0	0	0	0	0	0		0	0	0	1	1	1	1	1	1	0	1	1		0	0	0	0	0	0	0	0	0	0	0	0	0	0	0	pdxS, pdx1; pyridoxal 5'-phosphate synthase pdxS subunit [EC:4.3.3.6]
K08681	0	0	0	0	0	0		0	0	0	0	0	0	0	0	0	0	0		0	0	0	2	1	1	1	1	1	1	1	1		0	0	0	0	0	0	0	0	0	0	0	0	0	0	0	pdxT, pdx2; 5'-phosphate synthase pdxT subunit [EC:4.3.3.6]
K03517	0	0	0	0	0	0		1	1	1	1	1	1	2	1	1	0	1		1	0	1	0	1	1	1	2	1	1	2	2		2	3	3	0	0	0	0	0	1	1	0	0	1	0	0	nadA; quinolinate synthase [EC:2.5.1.72]
K00767	1	1	0	0	0	0		1	1	1	1	1	1	1	0	1	1	1		0	0	1	1	1	1	1	2	0	1	1	1		0	0	0	1	1	1	1	1	1	1	0	1	1	0	1	nadC, QPRT; nicotinate-nucleotide pyrophosphorylase (carboxylating) [EC:2.4.2.19]
K00763	0	1	1	1	1	1		1	1	1	1	1	1	1	1	1	1	1		0	0	1	1	0	1	1	1	1	0	0	0		1	1	1	1	1	0	0	0	0	1	1	1	0	0	0	pncB, NAPRT1; nicotinate phosphoribosyltransferase [EC:6.3.4.21]
K00969	1	1	1	1	1	1		1	1	1	1	1	1	0	1	1	1	1		1	1	1	1	1	1	1	0	1	1	1	1		1	1	1	1	1	1	1	1	1	1	1	1	1	0	1	nadD; nicotinate-nucleotide adenylyltransferase [EC:2.7.7.18]
K03426	0	0	1	1	1	1		0	1	1	0	0	0	0	0	0	0	0		0	0	0	0	0	0	0	0	0	0	0	0		0	0	0	0	0	0	0	0	0	0	0	0	0	0	0	E3.6.1.22, NUDT12, nudC; NAD+ diphosphatase [EC:3.6.1.22]
K01916	0	0	0	0	0	0		0	0	0	0	0	0	0	0	0	0	0		0	0	0	0	0	0	0	0	0	0	0	0		1	1	1	0	0	0	0	0	0	0	0	0	0	0	0	nadE; NAD+ synthase [EC:6.3.1.5]
K01950	1	1	1	0	1	0		0	0	0	1	1	1	0	0	0	0	0		1	0	0	0	1	1	1	1	1	0	1	1		1	1	1	1	0	1	1	0	1	0	1	0	0	1	1	E6.3.5.1, NADSYN1, QNS1, nadE; NAD+ synthase (glutamine-hydrolysing) [EC:6.3.5.1]
K03742	1	1	1	1	1	1		2	1	1	1	1	1	1	1	1	0	1		1	0	1	1	1	1	1	1	0	1	1	1		1	1	1	1	1	1	1	1	1	1	1	1	1	1	1	pncC; nicotinamide-nucleotide amidase [EC:3.5.1.42]
K03743	0	0	1	1	1	1		1	0	0	1	1	1	1	1	1	0	0		0	0	0	1	1	1	0	1	0	1	1	1		1	1	1	1	1	1	1	1	1	1	1	1	1	1	1	pncC; nicotinamide-nucleotide amidase [EC:3.5.1.42]
K08281	0	0	0	0	0	0		0	0	0	1	1	1	1	1	0	1	1		0	0	0	0	0	0	0	0	0	0	0	0		0	0	0	0	0	0	0	0	0	0	0	0	0	0	0	pncA; nicotinamidase/pyrazinamidase [EC:3.5.1.19 3.5.1.-]
K00858	2	1	1	1	1	1		1	1	0	1	1	1	1	0	2	1	1		1	0	1	1	2	1	1	0	1	1	1	1		1	1	1	0	0	1	1	1	1	1	1	1	1	1	1	ppnK, NADK; NAD+ kinase [EC:2.7.1.23]
K00322	1	0	0	0	0	0		0	0	0	0	0	0	0	0	0	0	0		0	0	0	0	0	0	1	0	0	0	0	0		1	1	1	0	0	1	1	0	1	1	0	1	1	1	0	sthA, udhA; NAD(P) transhydrogenase [EC:1.6.1.1]
K00324	1	1	1	1	1	1		1	1	1	1	1	1	0	0	0	0	0		0	0	1	1	0	1	1	2	1	0	1	0		1	1	1	0	0	1	1	1	1	1	1	1	1	1	1	pntA; H+-translocating NAD(P) transhydrogenase subunit alpha [EC:1.6.1.2 7.1.1.1]
K00325	1	1	1	1	1	1		1	1	1	1	1	1	0	0	0	0	0		0	0	1	1	1	1	1	1	1	0	0	0		0	0	0	0	0	2	1	1	1	2	1	1	1	1	0	pntB; H+-translocating NAD(P) transhydrogenase subunit beta [EC:1.6.1.2 7.1.1.1]
K13995	0	0	0	0	0	0		0	0	0	0	0	0	0	0	0	0	0		0	0	0	0	0	0	0	0	0	0	0	0		0	0	0	0	1	0	0	0	0	0	0	0	0	0	0	nicF; maleamate amidohydrolase [EC:3.5.1.107]
K00606	1	1	1	1	1	1		0	1	1	1	1	1	1	1	1	1	0		0	1	1	0	1	1	1	1	0	1	1	1		0	0	0	0	0	0	1	0	1	1	0	1	2	0	0	panB; 3-methyl-2-oxobutanoate hydroxymethyltransferase [EC:2.1.2.11]
K00077	1	1	1	1	1	1		1	1	1	0	0	0	0	0	0	0	0		0	0	1	0	0	0	0	0	0	0	0	0		0	0	0	0	0	0	1	1	1	1	1	1	1	0	0	panE, apbA; 2-dehydropantoate 2-reductase [EC:1.1.1.169]
K09680	0	0	0	0	0	0		0	0	0	0	0	0	0	0	0	0	0		0	0	0	0	0	0	0	0	0	0	0	0		1	1	1	0	0	0	0	0	0	0	0	0	0	0	0	coaW; type II pantothenate kinase [EC:2.7.1.33]
K03525	0	1	2	1	1	1		1	1	1	1	1	1	0	1	0	1	0		0	1	0	0	1	1	1	1	1	1	1	1		0	0	0	1	1	2	1	1	1	1	1	1	1	0	2	coaX; type III pantothenate kinase [EC:2.7.1.33]
K13038	1	1	1	1	1	1		0	1	1	1	1	1	1	0	1	1	1		1	1	1	1	1	1	1	0	1	1	1	1		1	1	1	1	0	1	1	1	1	1	1	1	1	1	1	coaBC, dfp; phosphopantothenoylcysteine decarboxylase / phosphopantothenate---cysteine ligase [EC:4.1.1.36 6.3.2.5]
K00954	1	1	1	1	1	1		1	1	1	1	1	1	1	1	2	1	1		1	1	1	1	2	1	1	1	1	0	1	1		1	1	1	0	1	1	1	1	1	1	1	1	1	1	1	E2.7.7.3A, coaD, kdtB; pantetheine-phosphate adenylyltransferase [EC:2.7.7.3]
K00859	1	1	1	1	1	1		1	1	1	1	1	1	0	1	1	2	1		1	0	0	1	1	1	1	1	1	1	1	1		1	1	1	1	2	1	0	0	1	1	0	1	1	1	1	coaE; dephospho-CoA kinase [EC:2.7.1.24]
K00997	1	1	1	1	1	1		1	0	1	1	1	1	1	1	0	1	0		1	0	2	1	1	1	1	0	1	1	1	1		1	1	1	0	0	0	0	0	0	0	0	0	0	0	0	acpS; holo-[acyl-carrier protein] synthase [EC:2.7.8.7]
K06133	1	2	0	0	0	0		0	0	1	0	0	0	0	0	0	0	0		0	0	0	2	0	1	1	2	0	0	0	0		2	2	2	0	1	0	0	0	1	1	0	0	0	0	0	LYS5, acpT; 4'-phosphopantetheinyl transferase [EC:2.7.8.-]
K00652	2	2	2	2	2	2		0	1	2	1	2	1	1	2	2	2	2		0	0	1	1	1	1	1	0	1	1	1	1		0	0	0	2	1	1	0	0	1	2	1	2	2	1	1	bioF; 8-amino-7-oxononanoate synthase [EC:2.3.1.47]
K01935	0	0	0	0	0	0		0	0	0	0	0	0	0	0	0	0	0		0	0	0	0	0	0	0	0	0	0	0	0		0	0	0	0	0	0	0	0	0	0	0	0	0	0	0	bioD; dethiobiotin synthetase [EC:6.3.3.3]
K01012	0	0	0	0	0	0		0	0	0	0	0	0	0	0	0	0	0		0	0	0	0	0	1	0	0	0	0	0	0		0	0	0	0	0	0	0	0	0	0	0	0	0	0	0	bioB; biotin synthase [EC:2.8.1.6]
K03524	0	1	1	1	1	1		1	1	1	1	1	1	0	1	0	1	0		0	1	0	0	1	1	1	1	1	1	1	1		1	1	1	0	1	1	1	1	1	1	1	1	1	0	1	birA; BirA family transcriptional regulator, biotin operon repressor / biotin---[acetyl-CoA-carboxylase] ligase [EC:6.3.4.15]
K03801	1	0	0	0	0	0		1	1	1	0	0	0	0	0	0	0	0		0	0	1	0	0	0	0	1	1	0	0	0		1	1	1	0	0	0	1	0	1	1	0	1	1	0	0	lipB; lipoyl(octanoyl) transferase [EC:2.3.1.181]
K03644	1	1	1	1	1	2		0	1	1	1	1	1	1	1	2	1	1		0	1	1	2	1	1	1	1	1	2	1	1		2	2	2	1	1	1	1	1	1	1	1	1	1	1	1	lipA, LIAS, LIP1, LIP5; lipoyl synthase [EC:2.8.1.8]
K03800	1	1	1	1	1	1		1	1	1	1	1	1	1	1	1	1	1		1	1	1	1	2	2	2	1	1	1	2	2		1	1	1	0	0	1	1	1	1	1	1	1	1	0	1	lplA, lplJ, lipL1; lipoate---protein ligase [EC:6.3.1.20]
K01495	1	1	1	1	1	1		1	1	1	1	1	1	0	1	0	1	0		0	0	0	1	1	1	1	2	1	1	1	1		1	1	1	1	1	1	1	0	1	1	1	1	1	1	1	GCH1, folE; GTP cyclohydrolase IA [EC:3.5.4.16]
K09007	0	0	0	0	0	0		0	0	0	0	0	0	0	0	0	0	0		1	1	1	0	0	0	0	0	0	0	0	0		0	0	0	0	0	0	0	0	0	0	0	0	0	0	0	folE2; GTP cyclohydrolase IB [EC:3.5.4.16]
K01113	2	2	2	3	2	2		0	2	1	1	0	0	0	0	0	0	0		1	0	0	0	1	2	4	2	0	0	1	1		0	0	0	0	0	1	2	2	2	3	0	2	1	1	1	phoD; alkaline phosphatase D [EC:3.1.3.1]
K08310	0	0	0	0	0	0		0	0	0	0	0	0	0	1	0	0	0		0	0	0	0	0	0	0	0	0	0	0	0		0	0	0	0	0	0	0	0	0	0	0	0	0	0	0	nudB, ntpA; dihydroneopterin triphosphate diphosphatase [EC:3.6.1.67]
K01633	1	1	1	1	1	1		1	1	1	1	1	1	0	1	1	1	1		0	0	1	1	1	1	1	1	1	1	1	1		1	1	1	0	1	1	0	1	1	1	1	1	1	0	1	folB; 7,8-dihydroneopterin aldolase/epimerase/oxygenase [EC:4.1.2.25 5.1.99.8 1.13.11.81]
K00950	1	1	1	1	1	1		1	1	1	1	1	1	0	1	1	1	1		1	1	2	1	1	1	1	1	1	1	1	1		1	1	1	1	1	1	0	1	1	1	1	1	1	1	1	folK; 2-amino-4-hydroxy-6-hydroxymethyldihydropteridine diphosphokinase [EC:2.7.6.3]
K00796	0	1	1	1	1	1		0	1	1	1	1	1	1	0	0	0	1		1	1	1	1	1	1	1	2	1	1	1	1		0	0	0	0	1	1	1	0	1	1	1	1	1	1	1	folP; dihydropteroate synthase [EC:2.5.1.15]
K00287	0	0	0	0	0	0		0	0	0	0	0	0	0	0	0	0	0		0	0	0	2	0	0	0	1	1	0	0	0		1	1	1	1	0	1	0	0	1	1	1	1	1	1	1	DHFR, folA; dihydrofolate reductase [EC:1.5.1.3]
K11754	1	1	0	1	1	1		0	1	0	1	1	1	0	0	1	1	1		1	0	1	0	1	1	1	1	1	1	1	1		1	1	1	1	0	1	1	1	1	1	1	1	1	1	1	folC; dihydrofolate synthase / folylpolyglutamate synthase [EC:6.3.2.12 6.3.2.17]
K01665	0	0	1	1	0	0		0	0	0	0	0	0	1	0	1	1	1		0	0	0	0	0	0	0	0	0	0	0	0		0	0	0	0	0	0	0	0	0	0	0	0	0	0	0	pabB; para-aminobenzoate synthetase component I [EC:2.6.1.85]
K03342	0	1	0	0	1	1		0	1	1	0	0	0	0	0	0	0	0		0	0	0	0	0	0	1	0	0	0	0	0		0	0	0	1	0	0	0	0	0	0	0	0	0	0	0	pabBC; para-aminobenzoate synthetase / 4-amino-4-deoxychorismate lyase [EC:2.6.1.85 4.1.3.38]
K07589	0	0	0	0	0	0		0	0	0	0	0	0	0	0	0	0	0		0	0	1	0	0	0	0	0	0	0	0	0		0	0	0	0	0	0	0	0	0	0	0	0	0	0	0	folX; D-erythro-7,8-dihydroneopterin triphosphate epimerase [EC:5.1.99.7]
K01737	0	1	1	1	1	1		1	1	1	1	1	1	0	0	0	0	0		0	0	1	2	2	1	2	3	2	2	2	2		1	1	1	0	0	1	0	0	0	0	1	0	1	1	0	queD, ptpS, PTS; 6-pyruvoyltetrahydropterin/6-carboxytetrahydropterin synthase [EC:4.2.3.12 4.1.2.50]
K01724	0	1	1	1	1	1		0	2	2	0	0	0	0	0	0	0	0		0	0	2	0	0	1	1	1	0	0	0	0		1	1	1	2	0	1	1	0	1	2	2	2	2	2	0	PCBD, phhB; 4a-hydroxytetrahydrobiopterin dehydratase [EC:4.2.1.96]
K10026	1	1	1	1	1	1		0	1	1	0	0	0	0	0	0	0	0		0	0	1	0	1	0	0	0	0	0	0	0		0	0	0	1	1	1	1	0	0	1	0	1	1	1	1	queE; 7-carboxy-7-deazaguanine synthase [EC:4.3.99.3]
K06920	0	0	0	0	0	0		0	1	2	0	0	0	0	0	0	0	0		0	0	1	0	1	0	0	0	0	0	1	1		0	0	0	0	0	1	1	1	1	1	1	1	1	1	0	queC; 7-cyano-7-deazaguanine synthase [EC:6.3.4.20]
K09457	0	0	0	0	0	0		0	1	1	0	0	0	0	0	0	0	0		0	0	0	0	1	0	0	0	0	0	1	1		1	1	1	0	0	1	1	1	1	0	1	1	1	1	0	queF; 7-cyano-7-deazaguanine reductase [EC:1.7.1.13]
K06897	0	0	0	0	0	0		0	0	0	2	1	1	1	2	1	1	1		0	0	1	1	1	2	1	2	1	0	1	1		2	2	2	0	0	1	0	0	0	0	0	2	1	1	0	K06897; 7,8-dihydropterin-6-yl-methyl-4-(beta-D-ribofuranosyl)aminobenzene 5'-phosphate synthase [EC:2.5.1.105]
K03639	1	1	1	1	1	1		1	1	1	0	1	1	0	0	0	0	0		0	0	0	0	0	0	0	0	1	0	0	0		1	1	1	0	0	1	1	0	1	1	1	1	1	1	1	moaA, CNX2; GTP 3',8-cyclase [EC:4.1.99.22]
K03637	1	1	1	1	1	1		0	1	1	0	1	1	0	0	0	0	0		0	0	0	0	0	0	0	0	1	0	0	0		1	1	1	1	0	1	1	0	1	0	1	1	0	1	1	moaC, CNX3; cyclic pyranopterin monophosphate synthase [EC:4.6.1.17]
K03635	2	1	2	2	2	2		0	1	1	0	0	1	0	0	0	0	0		0	0	0	0	0	0	0	0	0	0	0	0		2	2	2	1	1	1	1	0	1	2	2	1	1	0	0	MOCS2B, moaE; molybdopterin synthase catalytic subunit [EC:2.8.1.12]
K03831	1	1	1	1	1	1		0	0	0	0	0	0	0	0	0	0	0		0	0	0	0	0	0	0	0	0	0	0	0		1	1	1	0	0	0	0	0	0	1	1	0	0	0	0	mogA; molybdopterin adenylyltransferase [EC:2.7.7.75]
K03638	0	0	0	0	0	0		0	0	0	0	0	0	0	0	0	0	0		0	0	0	0	0	0	0	0	0	0	0	0		1	1	1	0	0	0	0	0	0	0	0	0	0	0	0	moaB; molybdopterin adenylyltransferase [EC:2.7.7.75]
K03750	1	1	1	1	1	1		0	1	1	0	1	1	0	0	0	0	0		0	0	0	0	0	0	0	0	0	0	0	0		1	1	1	1	1	1	0	1	1	1	1	1	1	1	1	moeA; molybdopterin molybdotransferase [EC:2.10.1.1]
K07141	1	1	1	1	1	1		0	1	1	1	1	1	0	0	0	0	0		1	0	0	1	1	0	1	1	0	0	0	0		2	2	2	0	0	2	0	2	2	2	1	2	3	2	2	mocA; molybdenum cofactor cytidylyltransferase [EC:2.7.7.76]
K03752	1	1	0	1	1	1		0	1	1	1	1	0	0	0	0	0	0		1	0	0	1	0	0	0	0	0	1	1	1		1	1	1	1	1	1	1	1	1	1	1	1	1	0	1	mobA; molybdenum cofactor guanylyltransferase [EC:2.7.7.77]
K00604	1	1	1	0	1	1		1	1	1	1	1	1	1	1	1	1	1		1	1	1	1	1	1	1	1	1	1	1	1		0	0	0	0	0	2	1	1	1	0	1	1	1	1	1	MTFMT, fmt; methionyl-tRNA formyltransferase [EC:2.1.2.9]
K01934	1	1	1	1	1	1		0	0	0	0	0	0	0	0	0	0	0		0	0	0	0	1	0	0	0	0	0	0	0		2	2	2	1	0	1	1	0	1	1	1	1	1	0	1	MTHFS; 5-formyltetrahydrofolate cyclo-ligase [EC:6.3.3.2]
K15734	0	0	0	0	0	0		0	1	0	0	0	0	0	0	0	0	0		0	0	0	0	0	0	0	0	0	0	0	0		0	0	0	0	0	0	0	0	0	0	0	0	0	0	0	SDR16C5; all-trans-retinol dehydrogenase (NAD+) [EC:1.1.1.105]
K09516	0	0	0	0	0	0		0	0	0	1	0	0	0	0	0	0	0		0	0	0	0	0	0	0	0	0	0	0	0		0	0	0	0	0	0	0	0	0	0	0	0	0	0	0	RETSAT; all-trans-retinol 13,14-reductase [EC:1.3.99.23]
K01885	1	2	2	2	2	2		1	2	2	2	2	2	2	1	1	1	2		2	1	2	1	1	1	1	1	0	1	1	1		2	2	2	2	2	2	2	1	2	2	1	0	2	1	1	EARS, gltX; glutamyl-tRNA synthetase [EC:6.1.1.17]
K02492	0	1	3	2	2	2		1	1	1	1	2	2	0	1	0	0	1		0	0	1	0	0	0	2	0	0	0	0	0		0	1	1	1	0	2	1	0	1	1	1	2	2	0	0	hemA; glutamyl-tRNA reductase [EC:1.2.1.70]
K01845	0	1	3	1	2	2		0	2	2	2	1	1	0	2	0	1	0		1	0	1	0	0	1	2	0	0	0	1	1		1	1	1	1	0	1	1	1	1	1	1	1	1	0	0	hemL; glutamate-1-semialdehyde 2,1-aminomutase [EC:5.4.3.8]
K01698	0	0	1	1	1	1		0	1	1	1	1	1	0	2	0	0	0		0	0	0	0	0	0	1	0	0	0	0	0		1	1	1	2	0	1	1	1	1	1	1	1	1	0	0	hemB, ALAD; porphobilinogen synthase [EC:4.2.1.24]
K01749	0	0	1	1	1	1		1	1	1	1	1	1	0	1	0	0	0		0	0	0	0	0	0	1	0	0	0	0	0		0	0	0	1	0	1	1	0	1	1	1	1	1	0	0	hemC, HMBS; hydroxymethylbilane synthase [EC:2.5.1.61]
K01719	0	0	1	1	1	1		0	1	1	1	1	1	0	1	0	0	0		0	0	0	0	0	0	1	0	0	0	0	0		0	0	0	1	0	1	1	0	1	1	1	1	1	0	0	hemD, UROS; uroporphyrinogen-III synthase [EC:4.2.1.75]
K01599	0	0	1	1	1	1		1	1	1	0	0	0	1	0	0	1	0		0	1	1	1	0	1	1	1	0	0	1	1		0	0	0	1	0	1	1	0	1	1	0	1	1	0	0	hemE, UROD; uroporphyrinogen decarboxylase [EC:4.1.1.37]
K00228	0	0	0	0	0	0		0	0	0	0	0	0	0	0	0	0	0		0	0	0	0	0	0	0	0	0	0	0	0		0	0	0	0	0	0	0	0	0	1	0	0	0	0	0	CPOX, hemF; coproporphyrinogen III oxidase [EC:1.3.3.3]
K02495	2	0	1	3	3	3		1	2	2	1	0	1	0	1	0	0	1		0	0	0	0	0	0	0	0	0	0	0	0		2	2	2	2	0	2	2	0	2	2	1	2	3	1	0	hemN, hemZ; oxygen-independent coproporphyrinogen III oxidase [EC:1.3.98.3]
K00230	0	0	0	0	0	0		0	0	0	0	0	0	0	1	1	0	0		0	0	1	1	1	1	2	2	3	2	1	1		0	0	0	0	0	0	0	0	0	0	0	0	0	0	0	hemG; menaquinone-dependent protoporphyrinogen oxidase [EC:1.3.5.3]
K00231	0	0	1	1	1	1		1	1	1	0	0	0	0	0	0	0	0		0	0	0	0	0	0	0	0	0	0	0	0		1	1	1	1	0	1	1	1	1	1	1	1	1	0	0	PPOX, hemY; protoporphyrinogen/coproporphyrinogen III oxidase [EC:1.3.3.4 1.3.3.15]
K01772	0	0	1	0	1	1		1	1	1	0	0	0	0	0	0	0	0		0	0	0	0	0	0	0	0	0	0	0	0		1	2	2	1	0	1	1	1	1	0	1	1	1	0	0	hemH, FECH; protoporphyrin/coproporphyrin ferrochelatase [EC:4.99.1.1 4.99.1.9]
K13542	0	0	0	0	0	0		0	0	0	1	1	1	0	1	0	0	0		0	0	0	0	0	0	1	0	0	0	0	0		0	0	0	0	0	0	0	0	0	0	0	0	0	0	0	cobA-hemD; uroporphyrinogen III methyltransferase / synthase [EC:2.1.1.107 4.2.1.75]
K02303	0	0	0	0	0	0		0	0	0	1	1	1	0	1	0	0	0		0	0	0	0	0	0	1	0	0	0	0	0		0	0	0	0	0	0	0	0	0	0	0	0	0	0	0	cobA; uroporphyrin-III C-methyltransferase [EC:2.1.1.107]
K02304	0	0	0	0	0	0		0	0	0	1	1	1	0	1	1	0	1		0	0	1	0	0	0	1	0	0	0	0	0		0	0	0	0	0	0	0	0	0	0	0	0	0	0	0	MET8; precorrin-2 dehydrogenase / sirohydrochlorin ferrochelatase [EC:1.3.1.76 4.99.1.4]
K22225	0	0	0	0	0	0		0	0	0	1	1	1	0	2	0	0	0		0	0	1	0	0	0	0	0	0	0	0	0		0	0	0	0	0	0	0	0	0	0	0	0	0	0	0	ahbAB; siroheme decarboxylase [EC:4.1.1.111]
K22226	0	0	0	0	0	0		0	0	0	1	1	1	0	1	0	0	0		0	0	0	0	0	0	1	0	0	0	0	0		0	0	0	0	0	0	0	0	0	0	0	0	0	0	0	ahbC; Fe-coproporphyrin III synthase
K22227	0	0	0	0	0	0		0	1	1	0	0	0	0	1	0	0	0		0	0	0	0	0	0	1	0	0	0	0	0		0	0	0	0	0	0	0	0	0	0	0	0	0	0	0	ahbD; AdoMet-dependent heme synthase [EC:1.3.98.6]
K02224	0	0	0	0	0	0		0	0	0	0	0	0	0	0	0	0	0		0	0	0	0	0	0	0	0	0	0	0	0		0	0	0	0	0	0	0	0	0	0	0	0	0	0	0	cobB-cbiA; cobyrinic acid a,c-diamide synthase [EC:6.3.5.9 6.3.5.11]
K00798	0	0	0	0	0	0		0	1	1	0	0	0	0	0	0	0	0		0	0	1	1	1	0	1	1	1	1	1	1		1	1	1	0	1	1	1	0	0	1	1	1	1	1	1	MMAB, pduO; cob(I)alamin adenosyltransferase [EC:2.5.1.17]
K19221	1	1	1	1	1	1		1	0	0	0	1	1	0	1	1	1	1		0	0	1	0	0	1	0	0	0	0	0	0		1	1	1	0	0	0	0	0	0	0	0	0	0	0	0	cobA, btuR; cob(I)alamin adenosyltransferase [EC:2.5.1.17]
K02232	0	0	0	0	0	0		0	0	0	0	0	0	0	0	0	0	0		0	0	0	0	0	0	0	0	0	0	0	0		1	1	1	0	0	0	0	0	0	0	0	0	0	0	0	cobQ, cbiP; adenosylcobyric acid synthase [EC:6.3.5.10]
K02227	0	0	0	0	0	0		0	0	0	0	0	0	0	0	1	1	0		0	0	0	0	0	0	0	0	0	0	0	0		1	1	1	0	0	0	0	0	0	0	0	0	0	0	0	cbiB, cobD; adenosylcobinamide-phosphate synthase [EC:6.3.1.10]
K02231	0	0	0	0	0	0		0	0	0	0	0	0	0	1	1	0	1		0	0	0	0	0	0	0	0	0	0	0	0		0	0	0	0	0	0	0	0	0	0	0	0	0	0	0	cobP, cobU; adenosylcobinamide kinase / adenosylcobinamide-phosphate guanylyltransferase [EC:2.7.1.156 2.7.7.62]
K02233	0	0	0	0	0	0		0	0	0	0	0	0	0	1	1	1	1		0	0	0	0	0	0	0	0	0	0	0	0		1	1	1	0	0	0	0	0	0	0	0	0	0	0	0	E2.7.8.26, cobS, cobV; adenosylcobinamide-GDP ribazoletransferase [EC:2.7.8.26]
K00768	1	0	0	0	0	0		0	0	0	0	0	0	0	1	1	0	1		0	0	0	0	0	0	0	0	0	0	0	0		1	1	1	0	0	0	0	0	0	0	0	0	0	0	0	E2.4.2.21, cobU, cobT; nicotinate-nucleotide--dimethylbenzimidazole phosphoribosyltransferase [EC:2.4.2.21]
K04720	0	0	0	0	0	0		0	0	0	0	0	0	0	0	0	1	0		0	0	0	0	0	0	0	0	0	0	0	0		1	1	1	0	0	0	0	0	0	0	0	0	0	0	0	cobD; threonine-phosphate decarboxylase [EC:4.1.1.81]
K04034	2	1	2	2	2	1		0	2	1	0	1	1	0	0	1	0	1		0	0	0	1	0	0	0	0	0	0	2	1		4	4	4	0	0	0	0	0	0	0	0	0	0	0	0	bchE; anaerobic magnesium-protoporphyrin IX monomethyl ester cyclase [EC:1.21.98.3]
K07215	0	0	0	0	0	0		0	0	0	0	0	0	0	0	0	0	0		0	0	0	0	0	0	0	0	0	0	0	0		1	1	1	0	0	0	0	0	0	0	0	0	0	0	0	pigA, hemO; heme oxygenase (biliverdin-IX-beta and delta-forming) [EC:1.14.99.58]
K03594	1	1	3	1	3	3		0	0	0	0	1	1	0	1	1	1	1		0	0	0	0	1	0	1	2	1	0	1	1		2	2	2	0	0	1	0	0	0	1	0	0	0	0	0	bfr; bacterioferritin [EC:1.16.3.1]
K03179	1	1	1	1	1	1		0	0	0	0	0	0	0	0	0	0	0		0	0	0	0	0	0	0	0	0	0	0	0		0	0	0	0	0	0	0	0	0	0	0	0	0	0	0	ubiA; 4-hydroxybenzoate polyprenyltransferase [EC:2.5.1.39]
K03182	1	0	1	0	1	1		0	0	0	0	0	0	0	0	0	0	0		0	0	0	0	0	0	0	0	0	0	0	0		0	0	0	0	0	0	0	0	0	0	0	0	0	0	0	ubiD; 4-hydroxy-3-polyprenylbenzoate decarboxylase [EC:4.1.1.98]
K03186	0	1	1	1	1	1		0	0	0	0	0	0	0	0	0	0	0		0	0	1	0	0	0	0	0	0	0	0	0		0	0	0	0	0	0	0	0	0	0	0	0	0	0	0	ubiX, bsdB, PAD1; flavin prenyltransferase [EC:2.5.1.129]
K03183	1	1	1	1	1	1		0	1	1	1	1	1	0	0	0	0	0		0	0	0	1	0	0	0	1	1	1	0	0		0	0	0	0	0	1	1	0	1	1	0	1	1	1	0	ubiE; demethylmenaquinone methyltransferase / 2-methoxy-6-polyprenyl-1,4-benzoquinol methylase [EC:2.1.1.163 2.1.1.201]
K06134	0	0	0	0	0	0		0	0	0	0	0	0	0	0	0	0	0		0	0	0	0	0	0	0	0	0	0	0	0		0	0	0	0	0	0	0	0	0	0	0	0	0	0	0	COQ7; 3-demethoxyubiquinol 3-hydroxylase [EC:1.14.99.60]
K02552	0	0	0	0	0	0		0	1	1	0	1	1	0	0	0	0	0		0	0	0	1	0	0	1	1	1	1	0	0		0	0	0	0	0	0	0	0	0	0	0	0	0	0	0	menF; menaquinone-specific isochorismate synthase [EC:5.4.4.2]
K02551	0	0	0	0	0	0		0	1	1	0	1	1	0	0	0	0	0		0	0	0	2	0	0	1	1	1	0	0	0		2	2	2	1	1	1	1	1	1	1	1	1	1	1	1	menD; 2-succinyl-5-enolpyruvyl-6-hydroxy-3-cyclohexene-1-carboxylate synthase [EC:2.2.1.9]
K08680	0	0	0	0	0	0		0	1	1	0	1	1	0	0	0	0	0		0	0	0	1	0	0	1	1	0	0	0	0		0	0	0	0	0	0	0	0	0	0	0	0	0	0	0	menH; 2-succinyl-6-hydroxy-2,4-cyclohexadiene-1-carboxylate synthase [EC:4.2.99.20]
K02549	1	1	0	0	1	1		0	1	1	0	1	1	0	0	0	0	0		0	0	0	1	0	0	0	1	0	0	1	0		0	0	0	0	1	1	1	0	0	1	1	1	0	1	1	menC; O-succinylbenzoate synthase [EC:4.2.1.113]
K01911	0	0	0	0	0	0		0	1	1	0	1	1	0	0	0	0	0		0	0	0	1	0	0	0	1	0	0	0	0		0	0	0	0	0	0	0	0	0	0	0	0	0	0	0	menE; O-succinylbenzoic acid---CoA ligase [EC:6.2.1.26]
K01661	0	0	0	0	0	0		0	1	1	0	1	1	0	0	0	0	0		0	0	0	1	0	0	1	1	0	0	0	0		0	0	0	1	1	1	1	0	1	1	0	1	1	1	1	menB; naphthoate synthase [EC:4.1.3.36]
K12073	0	0	0	0	0	0		0	0	0	0	0	0	0	0	0	0	0		0	0	0	0	0	0	1	0	0	0	0	0		0	0	0	0	0	0	0	0	0	0	0	0	0	0	0	E3.1.2.28; 1,4-dihydroxy-2-naphthoyl-CoA hydrolase [EC:3.1.2.28]
K02548	0	0	0	0	0	0		1	1	1	1	2	2	0	1	1	1	1		1	1	2	1	1	1	1	1	0	0	1	1		1	1	1	1	1	1	1	0	1	1	1	1	1	1	1	menA; 1,4-dihydroxy-2-naphthoate polyprenyltransferase [EC:2.5.1.74]
K11782	1	0	1	1	1	0		0	0	0	0	0	0	0	0	0	0	0		0	0	0	0	0	0	0	0	0	0	0	0		0	0	0	0	0	0	0	0	0	0	0	0	0	0	0	mqnA; chorismate dehydratase [EC:4.2.1.151]
K18285	0	0	0	1	1	1		0	0	0	0	0	0	0	0	0	0	0		0	0	0	0	0	0	0	0	0	0	0	0		0	0	0	0	0	0	0	0	0	0	0	0	0	0	0	mqnE; aminodeoxyfutalosine synthase [EC:2.5.1.120]
K11784	0	1	1	1	1	1		0	0	0	0	0	0	0	0	0	0	0		0	0	0	0	0	0	0	0	0	0	0	0		0	0	0	0	0	0	0	0	0	0	0	0	0	0	0	mqnC; cyclic dehypoxanthinyl futalosine synthase [EC:1.21.98.1]
K11785	1	1	1	1	1	1		0	0	0	0	0	0	0	0	0	0	0		0	0	0	0	0	0	0	0	0	0	0	0		0	0	0	0	0	0	0	0	0	0	0	0	0	0	0	mqnD; 1,4-dihydroxy-6-naphthoate synthase [EC:1.14.-.-]
K00355	0	0	0	0	0	0		0	0	0	0	0	0	0	0	0	0	0		0	0	0	1	0	0	0	0	0	0	0	0		0	0	0	0	0	0	0	0	0	0	0	0	0	0	0	NQO1; NAD(P)H dehydrogenase (quinone) [EC:1.6.5.2]
K03809	0	1	1	1	1	1		0	0	0	0	0	0	0	0	0	0	0		0	0	0	0	0	0	0	0	0	0	0	0		1	1	1	1	0	0	0	0	0	0	0	0	0	0	0	wrbA; NAD(P)H dehydrogenase (quinone) [EC:1.6.5.2]
K19267	0	0	0	0	0	0		0	0	0	0	0	0	0	0	0	0	0		0	0	0	0	0	0	0	0	0	0	0	0		0	0	0	0	0	1	0	0	0	0	0	2	0	0	0	qorB; NAD(P)H dehydrogenase (quinone) [EC:1.6.5.2]
K00099	1	1	1	1	1	1		0	1	1	1	1	1	1	1	1	1	1		1	1	0	1	0	1	1	1	1	0	1	1		1	1	1	1	1	1	1	1	1	1	1	1	1	1	1	dxr; 1-deoxy-D-xylulose-5-phosphate reductoisomerase [EC:1.1.1.267]
K00991	0	1	0	0	1	1		0	1	1	1	1	1	1	0	0	1	1		1	1	0	0	1	1	1	1	1	1	1	1		1	1	1	1	1	1	1	1	1	1	1	1	1	1	1	ispD; 2-C-methyl-D-erythritol 4-phosphate cytidylyltransferase [EC:2.7.7.60]
K00919	1	1	1	1	1	1		1	1	1	1	1	1	1	0	1	1	0		1	1	0	1	1	1	1	1	1	1	1	1		1	1	1	1	1	1	1	1	1	1	2	1	1	1	1	ispE; 4-diphosphocytidyl-2-C-methyl-D-erythritol kinase [EC:2.7.1.148]
K01770	0	0	0	0	0	0		0	0	0	0	0	0	0	0	0	0	0		0	0	0	1	0	0	1	1	1	1	1	1		0	0	0	0	0	0	0	0	0	0	0	0	0	0	0	ispF; 2-C-methyl-D-erythritol 2,4-cyclodiphosphate synthase [EC:4.6.1.12]
K03526	2	2	1	1	1	1		1	1	1	1	1	1	0	1	0	1	2		1	1	0	1	1	1	1	1	0	1	1	1		0	1	1	1	0	1	1	1	1	1	0	1	1	1	1	gcpE, ispG; (E)-4-hydroxy-3-methylbut-2-enyl-diphosphate synthase [EC:1.17.7.1 1.17.7.3]
K03527	1	1	1	1	1	1		1	1	1	1	1	1	0	1	1	0	0		1	0	0	1	1	1	1	1	1	1	1	1		0	0	0	1	0	1	1	0	1	1	1	1	2	1	1	ispH, lytB; 4-hydroxy-3-methylbut-2-en-1-yl diphosphate reductase [EC:1.17.7.4]
K00021	0	0	1	1	1	1		0	0	0	0	0	0	0	0	0	0	0		0	0	0	1	0	1	1	1	1	1	0	0		0	0	0	0	0	1	1	0	1	1	1	1	1	1	1	HMGCR; hydroxymethylglutaryl-CoA reductase (NADPH) [EC:1.1.1.34]
K00054	0	0	0	0	0	0		1	0	0	1	0	0	0	0	0	0	0		1	0	1	0	0	0	0	0	0	0	0	0		0	0	0	0	0	0	0	0	0	0	0	0	0	0	0	mvaA; hydroxymethylglutaryl-CoA reductase [EC:1.1.1.88]
K00869	1	0	0	0	0	0		1	0	0	1	0	0	1	0	1	1	1		1	0	1	3	0	2	2	3	3	2	0	0		0	0	0	0	0	0	0	0	1	0	0	0	0	0	0	E2.7.1.36, MVK, mvaK1; mevalonate kinase [EC:2.7.1.36]
K00938	0	0	0	0	0	0		0	0	0	1	0	0	0	0	0	0	0		1	0	0	0	0	0	0	0	1	0	0	0		0	0	0	0	0	0	0	0	0	0	0	0	0	0	0	E2.7.4.2, mvaK2; phosphomevalonate kinase [EC:2.7.4.2]
K01597	0	0	0	0	0	0		1	0	0	1	0	0	0	0	0	0	0		1	0	1	1	0	1	1	1	1	1	0	0		0	0	0	0	0	0	0	0	0	0	0	0	0	0	0	MVD, mvaD; diphosphomevalonate decarboxylase [EC:4.1.1.33]
K06981	0	0	0	0	0	0		0	0	0	0	0	0	0	0	0	0	0		0	0	1	0	0	0	1	0	0	0	1	1		0	0	0	0	0	0	0	0	0	0	0	0	0	0	0	ipk; isopentenyl phosphate kinase [EC:2.7.4.26]
K01823	0	1	1	1	1	1		1	0	0	1	1	1	0	0	0	0	0		0	0	0	1	0	1	1	1	1	0	0	0		1	2	2	0	0	0	0	0	0	0	0	0	0	0	0	idi, IDI; isopentenyl-diphosphate Delta-isomerase [EC:5.3.3.2]
K13787	1	1	0	0	0	0		1	0	1	1	1	1	1	1	0	1	1		0	0	0	1	0	0	0	0	0	0	0	0		1	1	1	1	1	0	0	0	0	0	0	0	0	0	0	idsA; geranylgeranyl diphosphate synthase, type I [EC:2.5.1.1 2.5.1.10 2.5.1.29]
K02523	1	1	1	1	1	1		1	1	1	1	1	1	0	1	0	1	0		1	1	0	1	1	1	1	1	0	0	1	1		0	0	0	1	1	1	1	1	1	1	1	1	1	1	1	ispB; octaprenyl-diphosphate synthase [EC:2.5.1.90]
K00806	1	1	1	1	1	1		1	1	1	1	1	1	1	1	1	1	1		0	1	1	0	1	1	1	1	1	1	1	1		1	1	1	1	1	1	0	1	1	1	1	1	1	1	1	uppS; undecaprenyl diphosphate synthase [EC:2.5.1.31]
K06013	0	1	1	1	1	1		1	0	1	1	1	1	1	0	1	1	1		1	1	1	1	1	1	1	1	1	0	1	1		0	0	0	0	0	1	1	1	0	1	1	1	1	1	1	STE24; STE24 endopeptidase [EC:3.4.24.84]
K00587	0	0	0	0	0	0		0	0	0	0	0	0	0	0	0	0	0		1	0	0	1	0	0	0	0	0	0	0	0		0	0	0	0	0	0	0	0	0	0	0	0	0	0	0	ICMT, STE14; protein-S-isoprenylcysteine O-methyltransferase [EC:2.1.1.100]
K02291	1	1	1	1	1	1		2	1	1	0	2	2	0	0	0	2	2		0	0	1	1	0	1	1	1	1	0	1	1		0	0	0	0	0	0	0	0	0	0	0	0	0	0	0	crtB; 15-cis-phytoene synthase [EC:2.5.1.32]
K09835	0	1	1	1	0	0		0	0	0	0	0	0	0	0	0	0	0		0	0	0	0	1	0	0	0	1	0	1	1		0	0	0	0	0	0	0	0	0	0	0	0	0	0	0	crtISO, crtH; prolycopene isomerase [EC:5.2.1.13]
K10027	0	1	1	0	1	1		0	0	0	0	0	0	0	0	0	0	0		0	0	1	1	0	1	2	1	1	0	1	1		1	1	1	0	0	0	0	0	0	0	0	0	0	0	0	crtI; phytoene desaturase [EC:1.3.99.26 1.3.99.28 1.3.99.29 1.3.99.31]
K09836	1	1	1	0	1	0		0	0	0	0	0	0	0	0	0	0	0		0	0	0	0	1	1	1	1	0	0	1	1		0	0	0	0	0	0	0	0	0	0	0	0	0	0	0	crtW, BKT; beta-carotene/zeaxanthin 4-ketolase [EC:1.14.99.63 1.14.99.64]
K15746	0	0	0	0	0	0		0	0	0	0	0	0	0	0	0	0	0		0	0	0	0	0	0	0	0	0	0	0	0		1	1	1	0	0	0	0	0	0	0	0	0	0	0	0	crtZ; beta-carotene 3-hydroxylase [EC:1.14.15.24]
K14597	1	1	1	1	1	1		0	0	0	0	0	0	0	0	0	0	0		0	0	0	0	1	1	1	1	0	0	1	1		0	0	0	0	0	0	0	0	0	0	0	0	0	0	0	cruC; chlorobactene glucosyltransferase
K10718	0	0	0	0	0	0		0	0	0	0	0	0	0	0	0	0	0		0	0	0	0	0	0	0	0	0	0	0	0		0	0	0	0	0	0	0	0	0	0	0	0	0	0	0	JHAMT; juvenile hormone-III synthase [EC:2.1.1.325]
K00791	0	1	1	1	1	1		1	1	1	1	1	1	0	0	1	2	1		1	1	1	1	1	1	1	1	1	1	1	1		1	1	1	1	1	1	0	0	1	1	1	1	1	0	1	miaA, TRIT1; tRNA dimethylallyltransferase [EC:2.5.1.75]
K14731	0	1	1	1	1	1		0	0	0	0	0	0	0	0	0	0	0		0	0	0	1	1	1	1	0	0	0	1	0		0	0	0	1	0	0	0	0	0	0	1	0	0	0	0	mlhB, chnC; epsilon-lactone hydrolase [EC:3.1.1.83]
K13775	0	0	0	0	0	0		0	0	0	0	0	0	0	0	0	0	0		0	0	0	0	0	0	0	0	0	0	0	0		0	0	0	1	0	1	0	0	1	1	1	1	0	1	0	atuG; citronellol/citronellal dehydrogenase
K21159	1	0	0	0	0	0		0	0	0	0	0	0	0	0	0	0	0		0	0	0	0	0	0	0	0	0	0	0	0		0	0	0	0	0	0	0	0	0	0	0	0	0	0	0	sgcF, ncsF2, kedF; epoxide hydrolase
K21164	1	0	0	0	0	0		0	0	0	0	0	0	0	0	0	0	0		0	0	0	0	0	0	0	0	0	0	0	0		0	0	0	1	1	0	0	0	0	0	0	0	0	0	0	sgcE7, ncsE7, kedE7; enediyne biosynthesis protein E7
K21210	0	0	0	0	0	0		0	0	0	0	0	0	0	0	0	0	0		0	0	0	0	0	0	0	0	0	0	0	0		0	0	0	0	0	0	0	0	0	0	0	0	0	0	0	ncsC; NDP-mannose synthase
K14257	0	0	0	0	0	0		0	0	0	0	0	0	0	0	0	0	0		0	0	0	0	0	0	0	0	0	0	0	0		0	0	0	0	0	0	0	0	0	0	0	0	0	0	0	ctcP, cts4, prnC; tetracycline 7-halogenase / FADH2 O2-dependent halogenase [EC:1.14.19.49 1.14.19.-]
K00973	1	1	1	0	1	1		1	1	1	1	1	1	0	0	1	0	0		1	1	1	1	1	1	1	1	1	1	1	1		0	0	0	1	1	1	0	0	1	1	1	1	1	1	1	E2.7.7.24, rfbA, rffH; glucose-1-phosphate thymidylyltransferase [EC:2.7.7.24]
K23144	0	0	0	0	0	0		0	0	0	0	0	0	0	1	1	0	0		0	1	0	1	1	1	1	1	1	0	1	1		0	0	0	0	0	0	0	0	0	0	0	0	0	0	0	K23144; UDP-N-acetylglucosamine diphosphorylase / glucose-1-phosphate thymidylyltransferase / UDP-N-acetylgalactosamine diphosphorylase / glucosamine-1-phosphate N-acetyltransferase / galactosamine-1-phosphate N-acetyltransferase [EC:2.7.7.23 2.7.7.24 2.7.7.83 2.3.1.157 2.3.1.276]
K01710	1	1	1	1	1	0		1	1	0	1	1	1	0	1	1	1	1		1	1	0	1	0	1	1	1	1	0	1	1		1	1	1	0	0	1	1	1	1	1	0	1	1	0	1	E4.2.1.46, rfbB, rffG; dTDP-glucose 4,6-dehydratase [EC:4.2.1.46]
K01790	2	1	2	1	1	1		0	1	2	1	1	1	0	1	1	1	1		1	1	2	1	1	1	1	1	2	0	1	1		1	1	1	0	0	1	1	0	1	1	1	1	1	1	1	rfbC, rmlC; dTDP-4-dehydrorhamnose 3,5-epimerase [EC:5.1.3.13]
K00067	2	2	2	2	2	2		2	3	3	2	2	2	2	1	2	2	2		0	1	2	1	2	2	2	2	1	2	2	2		1	1	1	0	0	1	1	1	1	1	1	1	1	1	1	rfbD, rmlD; dTDP-4-dehydrorhamnose reductase [EC:1.1.1.133]
K17947	0	0	0	0	0	0		0	0	0	0	1	0	0	0	1	1	1		0	0	0	0	0	0	0	0	0	0	0	0		0	0	0	0	0	0	0	0	0	0	0	0	0	0	0	wbiB; dTDP-L-rhamnose 4-epimerase [EC:5.1.3.25]
K00588	0	1	1	1	1	1		0	1	1	1	0	0	0	0	0	0	0		0	0	0	0	0	0	0	0	0	1	0	0		1	1	1	0	0	0	1	0	1	1	1	1	1	0	1	E2.1.1.104; caffeoyl-CoA O-methyltransferase [EC:2.1.1.104]
K08081	0	0	0	0	0	0		0	0	0	0	0	0	0	0	0	0	0		0	0	0	1	0	0	0	1	1	0	0	0		0	0	0	0	0	0	0	0	0	0	0	0	0	0	0	TR1; tropinone reductase I [EC:1.1.1.206]
K19064	0	0	0	0	0	0		1	0	0	0	0	0	0	0	0	0	0		0	1	1	0	1	1	1	0	0	0	0	0		0	0	0	0	0	0	0	0	0	0	0	0	0	0	0	lysDH; lysine 6-dehydrogenase [EC:1.4.1.18]
K15777	0	0	0	0	0	0		0	0	0	0	0	0	0	0	0	0	0		0	0	0	1	0	0	0	0	0	0	1	0		0	0	0	0	0	0	0	1	0	0	0	0	0	0	0	DOPA; 4,5-DOPA dioxygenase extradiol [EC:1.13.11.-]
K04127	0	0	0	0	0	0		0	1	1	0	0	0	0	0	0	0	0		0	0	0	0	0	0	0	0	0	0	0	0		0	0	0	0	0	0	0	0	0	0	0	0	0	0	0	cefD; isopenicillin-N epimerase [EC:5.1.1.17]
K01060	0	1	0	0	0	0		0	0	0	0	0	0	0	0	0	0	0		0	0	0	1	0	1	0	0	1	0	1	1		0	0	0	0	0	0	0	0	0	0	0	0	0	0	0	cah; cephalosporin-C deacetylase [EC:3.1.1.41]
K19200	0	0	0	0	0	0		0	0	0	0	0	0	0	2	0	0	0		0	0	0	0	0	0	1	0	0	0	0	0		0	0	0	0	0	0	0	0	0	0	0	0	0	0	0	IAL; isopenicillin-N N-acyltransferase like protein
K01434	3	3	3	2	3	2		1	2	2	3	2	2	1	1	1	1	0		1	1	1	0	2	0	0	0	0	0	1	1		1	1	1	0	0	2	2	0	2	1	2	2	2	1	3	E3.5.1.11; penicillin amidase [EC:3.5.1.11]
K17836	2	2	3	3	3	3		1	0	0	0	0	0	0	0	0	0	0		1	1	1	0	3	0	0	1	0	0	1	1		0	0	0	0	0	0	0	0	0	0	0	0	0	0	0	penP; beta-lactamase class A [EC:3.5.2.6]
K05375	1	1	0	0	0	0		0	0	0	0	0	0	0	0	0	0	0		0	0	0	1	0	0	0	1	0	0	0	0		1	1	1	0	0	0	0	0	1	1	0	0	0	0	1	mbtH, nocI; MbtH protein
K19978	0	0	0	0	0	0		0	0	0	0	0	0	0	0	0	0	0		0	0	0	0	0	0	0	1	0	0	0	0		0	0	0	0	0	0	0	0	0	0	0	0	0	0	0	acbK; acarbose 7IV-phosphotransferase [EC:2.7.1.187]
K14266	1	0	0	0	0	0		0	0	0	0	0	0	0	0	0	0	0		0	0	0	0	0	0	0	0	0	0	0	0		0	0	0	1	0	0	0	0	0	0	0	0	0	0	0	prnA, rebH, ktzQ; tryptophan 7-halogenase [EC:1.14.19.9]
K06998	0	0	0	0	0	0		0	0	0	0	0	0	0	0	0	0	0		0	0	1	0	0	0	0	0	0	0	0	0		2	2	2	1	0	1	0	0	0	0	1	0	0	0	0	phzF; trans-2,3-dihydro-3-hydroxyanthranilate isomerase [EC:5.3.3.17]
K20257	0	0	0	0	0	0		1	1	1	1	1	1	0	0	0	0	0		0	0	0	0	0	0	0	1	0	0	0	0		0	0	0	0	0	0	0	0	0	0	0	0	0	0	0	pqsE; 2-aminobenzoylacetyl-CoA thioesterase [EC:3.1.2.32]
K03464	0	0	0	0	0	0		0	0	0	0	0	0	0	0	0	0	0		0	0	0	0	0	0	0	0	0	2	0	0		0	0	0	0	0	0	0	0	0	0	0	0	0	0	0	catC; muconolactone D-isomerase [EC:5.3.3.4]
K14333	0	0	0	0	0	0		0	0	0	0	0	0	0	0	0	0	0		0	0	0	0	0	0	0	0	0	0	0	0		0	0	0	0	0	0	0	0	0	0	0	0	0	0	0	DHBD; 2,3-dihydroxybenzoate decarboxylase [EC:4.1.1.46]
K07104	0	1	1	1	1	0		0	0	0	0	0	0	0	0	0	0	0		0	0	0	0	0	0	0	0	0	0	0	0		0	0	0	0	0	0	1	0	0	1	0	0	0	0	0	catE; catechol 2,3-dioxygenase [EC:1.13.11.2]
K01821	1	0	0	0	0	0		0	0	0	0	0	0	0	0	0	0	0		0	0	0	0	0	0	0	0	0	0	0	0		0	0	0	0	0	0	0	0	0	2	1	1	0	1	0	praC, xylH; 4-oxalocrotonate tautomerase [EC:5.3.2.6]
K20941	0	0	0	0	0	0		0	0	0	0	0	0	0	0	0	0	0		0	0	0	0	0	0	0	0	0	0	0	0		0	0	0	0	0	0	0	0	0	0	0	0	0	0	0	graF; gamma-resorcylate decarboxylase [EC:4.1.1.103]
K01607	3	1	1	1	1	1		0	0	0	0	1	1	0	0	0	0	0		0	0	1	1	0	0	0	0	0	1	0	0		1	1	1	0	0	0	0	0	0	0	0	0	0	0	0	pcaC; 4-carboxymuconolactone decarboxylase [EC:4.1.1.44]
K22553	0	0	0	0	0	0		0	0	0	0	0	0	0	0	0	0	0		0	0	0	0	0	0	0	0	0	0	0	0		0	0	0	0	0	0	0	0	0	0	0	0	0	0	0	CYP199A2; 4-methoxybenzoate monooxygenase (O-demethylating) [EC:1.14.99.15]
K04108	1	1	1	0	0	1		0	0	0	0	0	0	0	0	0	0	0		0	0	0	0	0	0	0	0	0	0	0	0		1	1	1	1	0	0	1	0	1	0	1	0	1	0	0	hcrA, hbaC; 4-hydroxybenzoyl-CoA reductase subunit alpha [EC:1.3.7.9]
K04112	1	0	0	0	0	0		0	0	0	0	0	0	0	0	0	0	0		0	0	0	0	0	0	0	0	0	0	0	0		1	1	1	0	0	0	0	0	0	0	0	0	0	0	0	bcrC, badD; benzoyl-CoA reductase subunit C [EC:1.3.7.8]
K04113	1	0	0	0	0	0		1	0	0	0	0	0	0	0	0	0	0		0	0	0	0	0	0	0	0	0	0	0	0		1	1	1	0	0	0	0	0	0	0	0	0	0	0	0	bcrB, badE; benzoyl-CoA reductase subunit B [EC:1.3.7.8]
K04114	0	0	0	0	0	0		0	0	0	0	0	0	0	0	0	0	0		0	0	0	0	0	0	0	0	0	0	0	0		0	0	0	0	0	0	0	0	0	0	0	0	0	0	0	bcrA, badF; benzoyl-CoA reductase subunit A [EC:1.3.7.8]
K04115	0	0	0	0	0	0		0	0	0	0	0	0	0	0	0	0	0		0	0	0	0	0	0	0	0	0	0	0	0		0	0	0	0	0	0	0	0	0	0	0	0	0	0	0	bcrD, badG; benzoyl-CoA reductase subunit D [EC:1.3.7.8]
K07537	0	0	0	0	0	0		0	0	0	0	0	0	0	0	0	0	0		0	0	0	0	0	0	0	0	0	0	0	0		1	1	1	1	0	1	0	0	0	0	1	0	1	1	1	dch; cyclohexa-1,5-dienecarbonyl-CoA hydratase [EC:4.2.1.100]
K07538	0	0	0	0	0	0		0	0	0	0	0	0	0	0	0	0	0		0	0	0	0	0	0	0	0	0	0	0	0		0	0	0	0	0	0	0	0	0	0	1	0	0	0	0	had; 6-hydroxycyclohex-1-ene-1-carbonyl-CoA dehydrogenase [EC:1.1.1.368]
K07539	1	0	0	0	0	0		0	0	0	0	0	0	0	0	0	0	0		0	0	0	0	0	0	0	0	0	0	0	0		0	0	0	0	0	0	0	0	0	0	0	0	0	0	0	oah; 6-oxocyclohex-1-ene-carbonyl-CoA hydrolase [EC:3.7.1.21]
K01576	0	0	0	0	0	0		0	0	0	0	0	0	0	0	0	0	0		0	0	0	0	0	0	0	0	0	0	0	0		0	0	0	0	0	0	0	0	0	0	0	0	0	0	0	mdlC; benzoylformate decarboxylase [EC:4.1.1.7]
K09461	0	0	0	0	0	0		0	2	1	0	0	0	0	0	0	0	0		0	0	0	0	0	0	0	0	0	0	0	0		0	0	0	0	0	0	0	0	0	0	0	0	0	0	0	E1.14.13.40; anthraniloyl-CoA monooxygenase [EC:1.14.13.40]
K01061	1	2	3	3	3	3		0	1	1	0	0	0	0	0	0	0	0		0	0	0	1	0	0	1	1	0	0	0	0		2	3	3	2	1	1	1	0	1	1	1	1	1	1	1	E3.1.1.45; carboxymethylenebutenolidase [EC:3.1.1.45]
K01563	0	0	0	0	0	0		0	1	1	0	0	0	0	0	0	0	0		0	0	0	0	0	0	0	0	0	0	0	0		0	0	0	0	0	1	0	0	1	1	0	1	1	0	0	dhaA; haloalkane dehalogenase [EC:3.8.1.5]
K01561	0	0	0	0	0	0		0	0	0	0	0	0	0	0	0	0	0		0	0	0	0	0	0	0	0	0	0	0	0		0	0	0	0	0	0	0	0	0	0	0	0	0	0	1	dehH; haloacetate dehalogenase [EC:3.8.1.3]
K01560	0	0	0	0	0	0		0	1	1	0	0	0	0	0	0	0	0		0	0	0	0	0	0	0	0	0	0	0	0		0	0	0	0	0	0	1	0	1	0	1	1	1	1	0	E3.8.1.2; 2-haloacid dehalogenase [EC:3.8.1.2]
K05797	0	0	0	0	0	0		0	0	0	0	0	0	0	0	0	0	0		0	0	0	0	0	0	0	0	0	0	0	0		0	0	0	0	0	0	0	0	1	1	0	1	0	0	0	pchF; 4-cresol dehydrogenase (hydroxylating) flavoprotein subunit [EC:1.17.9.1]
K10680	0	0	0	0	0	0		0	0	0	0	0	0	0	0	0	0	0		0	0	0	0	0	0	0	0	0	0	0	0		0	0	0	0	0	0	0	0	0	0	0	0	0	0	0	nemA; N-ethylmaleimide reductase [EC:1.-.-.-]
K06281	0	1	0	0	0	0		0	0	0	0	1	1	0	0	0	0	0		1	0	1	0	0	0	0	0	0	0	0	0		0	0	0	0	0	0	0	0	0	0	0	0	0	0	0	hyaB, hybC; hydrogenase large subunit [EC:1.12.99.6]
K06282	1	1	0	0	0	0		0	0	0	0	1	1	0	0	0	0	0		1	0	1	0	0	0	0	0	0	0	0	0		1	1	1	0	0	0	0	0	0	0	0	0	0	0	0	hyaA, hybO; hydrogenase small subunit [EC:1.12.99.6]
K10701	0	0	0	0	0	0		0	0	0	0	0	0	0	0	0	0	0		0	0	0	0	0	0	0	0	0	0	0	0		0	0	0	0	0	0	0	0	0	0	0	0	0	0	0	apc; acetophenone carboxylase [EC:6.4.1.8]
K18199	1	0	0	0	0	0		0	1	1	0	0	0	0	0	0	0	0		0	0	0	0	0	0	0	0	0	0	0	0		1	1	1	0	0	0	1	0	1	0	0	0	0	0	0	inhA; cyclohexyl-isocyanide hydratase [EC:4.2.1.103]
K03333	1	1	1	1	1	1		1	0	0	1	1	1	0	0	0	0	0		1	1	0	1	1	0	1	1	1	0	0	0		0	0	0	0	0	0	0	1	2	2	0	2	0	0	0	choD; cholesterol oxidase [EC:1.1.3.6]
K00485	0	1	1	2	2	2		0	0	0	0	0	0	0	0	0	0	0		0	0	0	0	0	0	0	0	0	0	0	0		1	1	1	0	0	0	0	0	0	0	0	0	0	0	0	FMO; dimethylaniline monooxygenase (N-oxide forming) [EC:1.14.13.8]
K03040	1	1	1	1	1	1		1	1	1	1	1	1	0	1	1	1	0		1	1	1	1	1	1	1	1	1	1	1	0		1	3	3	0	1	1	1	1	1	1	1	1	1	1	1	rpoA; DNA-directed RNA polymerase subunit alpha [EC:2.7.7.6]
K03043	1	1	1	1	1	1		1	0	1	1	1	1	1	1	2	1	1		1	0	1	0	0	1	1	1	0	1	1	1		2	2	2	1	1	1	1	1	1	1	1	1	1	1	1	rpoB; DNA-directed RNA polymerase subunit beta [EC:2.7.7.6]
K03046	1	1	1	1	1	1		2	0	1	1	1	1	1	2	2	1	1		1	2	2	1	0	1	1	1	0	1	1	1		2	2	2	1	1	1	1	1	1	2	1	1	1	0	1	rpoC; DNA-directed RNA polymerase subunit beta' [EC:2.7.7.6]
K03060	1	1	1	1	1	1		0	1	1	1	1	1	1	0	1	1	1		1	1	1	2	1	1	1	0	1	1	1	1		1	1	1	1	0	1	1	1	1	1	1	1	1	1	1	rpoZ; DNA-directed RNA polymerase subunit omega [EC:2.7.7.6]
K03050	0	0	0	0	0	0		0	1	0	0	0	0	0	0	0	0	0		0	0	0	0	0	0	0	0	0	0	0	0		0	0	0	0	0	0	0	0	0	0	0	0	0	0	0	rpoE2; DNA-directed RNA polymerase subunit E\\\
K10843	0	0	0	0	0	0		0	0	0	0	1	1	0	0	0	1	1		0	0	1	0	0	0	0	1	0	0	0	0		0	0	0	1	0	0	0	0	0	0	0	0	0	0	0	ERCC3, XPB; DNA excision repair protein ERCC-3 [EC:3.6.4.12]
K02945	0	1	2	2	1	1		2	2	1	1	0	1	1	1	1	1	1		1	0	1	1	1	1	1	1	1	0	1	0		1	1	1	0	0	1	1	1	1	1	1	1	1	2	1	RP-S1, rpsA; small subunit ribosomal protein S1
K02967	1	1	1	1	1	1		1	1	1	1	1	1	1	1	1	1	1		1	1	2	1	1	1	1	1	1	1	1	1		1	1	1	1	1	1	1	1	1	1	1	1	1	1	1	RP-S2, MRPS2, rpsB; small subunit ribosomal protein S2
K02982	1	1	1	1	1	1		1	1	1	1	1	1	1	1	1	1	1		1	0	1	1	1	1	1	1	1	1	1	1		1	1	1	0	1	1	1	1	1	1	1	1	1	0	1	RP-S3, rpsC; small subunit ribosomal protein S3
K02986	1	1	1	1	1	1		1	1	1	1	1	1	0	1	1	1	0		1	1	2	1	1	1	1	1	1	1	1	0		1	1	1	0	1	1	1	1	1	1	1	1	1	1	1	RP-S4, rpsD; small subunit ribosomal protein S4
K02988	1	1	1	1	1	1		1	1	1	1	1	0	1	1	1	1	1		1	0	1	1	1	1	1	1	1	1	1	1		1	1	1	0	1	1	1	1	1	1	1	1	1	1	1	RP-S5, MRPS5, rpsE; small subunit ribosomal protein S5
K02990	0	1	1	1	1	1		1	1	1	1	1	1	0	0	1	1	0		1	1	1	1	1	1	1	1	1	1	1	1		1	1	1	1	0	1	1	0	1	1	1	1	1	1	1	RP-S6, MRPS6, rpsF; small subunit ribosomal protein S6
K02992	0	1	1	1	1	1		0	0	1	1	1	1	1	0	1	1	1		1	1	1	1	0	1	1	1	0	1	1	1		2	1	1	1	0	1	1	1	1	1	1	2	1	0	1	RP-S7, MRPS7, rpsG; small subunit ribosomal protein S7
K02994	1	1	1	1	1	1		1	1	1	1	1	0	1	1	1	1	1		1	0	1	1	1	1	1	1	1	1	1	0		1	1	1	0	1	1	1	1	1	1	1	1	1	1	1	RP-S8, rpsH; small subunit ribosomal protein S8
K02996	0	1	1	1	1	1		1	1	1	1	1	1	1	1	0	1	1		1	1	1	1	1	1	1	1	1	1	1	1		1	1	1	1	1	1	1	1	1	1	1	0	1	1	2	RP-S9, MRPS9, rpsI; small subunit ribosomal protein S9
K02946	0	1	1	1	1	0		0	1	1	1	1	0	1	1	1	1	1		1	0	1	1	1	1	1	1	1	1	1	1		1	1	1	0	1	1	1	1	1	1	1	1	1	0	1	RP-S10, MRPS10, rpsJ; small subunit ribosomal protein S10
K02948	1	1	1	1	1	1		0	1	1	1	1	1	0	1	1	1	0		1	1	1	0	1	1	1	1	1	1	0	0		1	1	1	0	1	1	1	1	1	1	1	1	1	1	1	RP-S11, MRPS11, rpsK; small subunit ribosomal protein S11
K02950	0	1	1	1	1	1		1	0	1	1	1	1	1	1	1	1	1		1	1	1	0	0	1	1	1	0	1	1	1		2	1	1	1	0	1	1	1	1	1	1	1	1	0	1	RP-S12, MRPS12, rpsL; small subunit ribosomal protein S12
K02952	1	1	1	1	1	1		0	1	1	1	1	1	0	1	1	1	1		1	1	1	0	1	1	1	1	1	1	0	0		1	1	1	0	1	1	1	1	1	1	1	1	1	1	1	RP-S13, rpsM; small subunit ribosomal protein S13
K02954	0	0	0	0	0	0		0	1	0	0	1	0	1	1	0	0	1		1	0	1	0	0	1	0	0	0	0	1	1		0	0	0	0	0	0	0	0	0	0	0	0	0	0	0	RP-S14, MRPS14, rpsN; small subunit ribosomal protein S14
K02956	1	1	1	1	1	1		1	1	1	1	1	1	1	1	1	1	1		1	0	1	1	1	1	1	1	1	1	1	1		1	1	1	1	2	1	1	1	1	1	1	1	1	0	1	RP-S15, MRPS15, rpsO; small subunit ribosomal protein S15
K02959	1	1	2	1	1	1		1	1	1	1	1	1	1	1	1	1	1		1	1	1	1	1	1	1	1	0	1	1	1		0	0	0	1	1	1	1	1	1	1	1	1	1	1	1	RP-S16, MRPS16, rpsP; small subunit ribosomal protein S16
K02961	1	1	1	1	1	1		1	1	1	1	1	1	1	1	1	1	1		1	0	1	1	1	1	1	1	1	1	2	1		1	1	1	0	1	1	1	1	1	1	1	1	1	1	2	RP-S17, MRPS17, rpsQ; small subunit ribosomal protein S17
K02963	1	1	1	1	1	1		1	0	0	1	1	1	1	1	1	1	0		1	1	1	1	1	1	1	1	1	1	1	1		1	1	1	1	0	2	1	0	1	1	1	1	1	0	1	RP-S18, MRPS18, rpsR; small subunit ribosomal protein S18
K02965	1	1	1	1	1	1		1	1	1	1	1	1	0	1	1	1	1		1	0	1	1	1	1	1	1	1	1	1	1		1	1	1	0	1	1	1	1	1	1	1	1	1	0	1	RP-S19, rpsS; small subunit ribosomal protein S19
K02968	1	1	1	1	1	1		1	1	1	1	1	1	1	1	1	1	1		1	1	1	1	1	1	1	1	1	1	1	1		1	1	1	1	1	1	1	1	1	1	1	1	1	1	1	RP-S20, rpsT; small subunit ribosomal protein S20
K02970	1	1	2	2	2	2		1	1	1	1	1	1	1	0	1	1	0		1	2	1	1	1	1	1	1	1	1	2	2		1	1	1	0	0	1	1	0	0	1	1	1	1	0	1	RP-S21, MRPS21, rpsU; small subunit ribosomal protein S21
K02979	0	0	0	0	0	0		0	0	0	0	0	0	0	0	0	0	0		0	0	0	0	0	0	0	0	0	0	0	0		0	0	0	0	0	0	0	0	0	0	0	0	0	0	0	RP-S28e, RPS28; small subunit ribosomal protein S28e
K02863	0	1	1	1	1	1		1	0	1	1	1	1	1	1	1	1	1		1	0	1	1	0	1	1	1	0	1	1	0		1	1	1	0	0	1	1	1	1	2	0	1	1	1	1	RP-L1, MRPL1, rplA; large subunit ribosomal protein L1
K02886	1	1	1	1	1	1		1	1	1	1	1	0	1	1	1	1	1		1	0	1	1	1	1	1	1	1	1	1	1		1	1	1	0	1	1	1	1	1	1	1	1	1	0	1	RP-L2, MRPL2, rplB; large subunit ribosomal protein L2
K02906	0	1	1	1	1	1		1	1	1	1	1	0	1	1	1	1	1		1	0	1	1	1	1	1	1	1	1	1	1		1	1	1	0	1	1	1	1	1	1	1	1	1	0	1	RP-L3, MRPL3, rplC; large subunit ribosomal protein L3
K02926	0	1	1	1	1	1		1	1	1	1	1	0	1	1	1	1	1		1	0	1	1	1	1	1	1	1	1	1	1		1	1	1	0	1	1	1	1	1	1	1	1	1	0	1	RP-L4, MRPL4, rplD; large subunit ribosomal protein L4
K02931	1	1	1	1	1	1		1	1	1	1	1	1	1	0	1	1	1		1	0	1	1	1	1	1	1	1	1	1	1		2	1	1	0	1	1	1	1	1	1	1	1	1	1	1	RP-L5, MRPL5, rplE; large subunit ribosomal protein L5
K02933	1	1	1	1	1	1		1	1	1	1	1	0	1	1	1	1	1		1	0	1	1	1	1	1	1	1	1	1	0		2	1	1	0	1	1	1	1	1	0	1	1	1	1	1	RP-L6, MRPL6, rplF; large subunit ribosomal protein L6
K02935	0	1	1	1	1	1		1	0	1	1	1	1	0	1	1	1	1		1	0	1	2	0	1	1	1	0	1	1	0		1	1	1	0	0	1	1	1	1	1	0	1	1	1	1	RP-L7, MRPL12, rplL; large subunit ribosomal protein L7/L12
K02939	1	1	1	1	1	1		1	1	1	1	1	1	1	1	1	1	0		1	1	1	1	1	1	1	1	1	1	1	1		1	1	1	1	0	2	1	0	1	1	1	1	1	0	1	RP-L9, MRPL9, rplI; large subunit ribosomal protein L9
K02864	0	1	1	1	1	1		1	0	1	1	1	1	0	1	1	1	1		1	0	1	1	0	1	1	1	0	1	1	0		1	1	1	0	0	1	1	1	1	1	0	1	1	1	1	RP-L10, MRPL10, rplJ; large subunit ribosomal protein L10
K02867	0	1	1	1	1	1		1	0	1	1	1	1	1	1	1	1	1		1	0	1	1	0	1	1	1	0	1	1	0		1	1	1	0	0	1	1	0	1	1	0	1	1	1	1	RP-L11, MRPL11, rplK; large subunit ribosomal protein L11
K02871	0	1	1	1	1	1		1	1	1	1	1	1	1	1	1	1	1		1	1	1	1	1	1	1	1	1	1	1	1		1	1	1	1	1	1	1	1	1	1	1	1	1	1	3	RP-L13, MRPL13, rplM; large subunit ribosomal protein L13
K02874	1	1	1	1	1	1		1	1	1	1	1	1	1	1	1	1	1		1	0	1	1	1	1	1	1	1	1	2	1		1	1	1	0	1	1	1	1	1	1	1	1	1	1	2	RP-L14, MRPL14, rplN; large subunit ribosomal protein L14
K02876	1	1	1	1	1	1		1	1	1	1	1	0	1	1	1	1	1		1	0	1	1	1	1	1	1	1	1	1	1		1	1	1	0	1	1	1	1	1	1	1	1	1	1	1	RP-L15, MRPL15, rplO; large subunit ribosomal protein L15
K02878	1	1	1	1	1	1		1	1	1	1	1	1	1	1	1	1	1		1	0	1	1	1	1	1	1	1	1	2	1		1	1	1	0	1	1	1	1	1	1	1	1	1	1	1	RP-L16, MRPL16, rplP; large subunit ribosomal protein L16
K02879	1	1	1	1	1	1		1	1	1	1	1	1	0	1	1	1	0		1	1	1	1	1	1	1	1	1	1	1	1		1	1	1	1	1	1	1	1	1	1	1	1	1	1	1	RP-L17, MRPL17, rplQ; large subunit ribosomal protein L17
K02881	1	1	1	1	1	1		1	1	1	1	1	0	1	1	1	1	1		1	0	1	2	1	1	1	1	1	1	1	0		2	1	1	0	1	1	1	1	1	1	1	1	1	1	1	RP-L18, MRPL18, rplR; large subunit ribosomal protein L18
K02884	1	1	1	1	1	1		1	1	1	1	1	1	1	0	1	1	1		0	1	1	1	1	1	1	1	0	1	1	1		0	0	0	1	1	1	1	0	1	1	1	1	1	1	1	RP-L19, MRPL19, rplS; large subunit ribosomal protein L19
K02887	1	1	1	0	1	1		1	0	0	1	1	1	1	1	1	1	1		0	1	1	1	1	1	1	1	2	1	1	1		1	1	1	2	1	1	1	1	1	1	1	1	1	1	1	RP-L20, MRPL20, rplT; large subunit ribosomal protein L20
K02888	0	1	1	1	1	1		1	1	1	1	1	1	0	0	1	1	1		1	1	1	1	1	1	1	1	1	1	1	1		1	1	1	1	1	1	1	2	1	1	1	1	1	1	1	RP-L21, MRPL21, rplU; large subunit ribosomal protein L21
K02890	1	1	1	1	1	1		1	1	1	1	1	1	1	1	1	1	1		1	0	1	1	1	1	1	1	1	1	1	1		1	1	1	0	1	1	1	1	1	1	1	1	1	0	1	RP-L22, MRPL22, rplV; large subunit ribosomal protein L22
K02892	1	1	1	1	1	1		1	1	1	1	1	0	1	1	1	1	1		1	0	1	1	1	1	1	1	1	1	1	1		1	1	1	0	1	1	1	1	1	1	1	1	1	0	1	RP-L23, MRPL23, rplW; large subunit ribosomal protein L23
K02895	1	1	1	1	1	1		1	2	2	1	1	1	1	1	1	1	1		2	0	1	1	1	1	1	1	1	1	1	1		1	1	1	1	1	1	1	1	1	1	1	1	1	1	1	RP-L24, MRPL24, rplX; large subunit ribosomal protein L24
K02897	0	1	1	1	1	1		1	1	1	1	1	1	1	0	1	1	0		1	1	1	1	1	1	1	1	1	1	1	1		1	1	1	1	1	1	1	1	1	1	1	1	1	1	1	RP-L25, rplY; large subunit ribosomal protein L25
K02899	0	1	1	1	1	1		1	1	1	1	1	1	0	0	1	1	1		1	1	1	1	0	1	1	1	1	1	1	1		1	1	1	0	1	1	1	1	1	1	1	1	1	1	1	RP-L27, MRPL27, rpmA; large subunit ribosomal protein L27
K02902	0	1	1	1	1	1		1	1	1	1	1	1	1	1	1	1	1		1	1	0	0	1	1	1	1	1	1	1	0		1	1	1	1	0	1	1	1	1	1	1	1	1	1	0	RP-L28, MRPL28, rpmB; large subunit ribosomal protein L28
K02904	1	1	1	1	1	1		1	1	1	1	1	1	1	1	1	1	1		1	0	1	1	1	1	1	1	1	1	2	1		1	1	1	0	1	1	1	1	1	1	1	1	1	1	2	RP-L29, rpmC; large subunit ribosomal protein L29
K02907	1	1	1	1	1	1		1	1	1	1	1	0	1	1	1	1	1		1	0	1	1	1	1	1	1	1	1	1	1		0	0	0	0	1	1	1	1	1	1	1	1	1	1	1	RP-L30, MRPL30, rpmD; large subunit ribosomal protein L30
K02909	1	1	1	1	1	1		1	0	1	0	1	1	0	0	1	1	1		1	1	1	1	1	1	1	1	1	1	1	1		1	1	1	1	1	1	1	1	1	1	1	1	1	1	1	RP-L31, rpmE; large subunit ribosomal protein L31
K02911	0	0	0	0	0	0		0	0	0	0	0	0	1	1	1	1	0		0	0	0	1	0	1	0	0	0	0	0	0		0	0	0	0	0	0	0	0	0	0	0	0	0	0	0	RP-L32, MRPL32, rpmF; large subunit ribosomal protein L32
K02913	0	1	0	0	0	0		0	0	1	0	0	0	0	0	0	0	0		0	0	0	0	0	0	0	0	0	0	1	0		0	0	0	0	0	0	0	0	0	0	0	0	0	0	0	RP-L33, MRPL33, rpmG; large subunit ribosomal protein L33
K02914	1	1	0	1	0	0		1	0	0	0	1	1	0	0	1	1	0		1	0	0	1	0	1	1	1	1	0	0	0		0	0	0	0	0	0	0	0	0	0	0	0	0	0	0	RP-L34, MRPL34, rpmH; large subunit ribosomal protein L34
K02916	1	1	1	0	1	1		1	1	1	1	1	1	0	1	0	1	1		0	1	0	1	1	1	1	1	2	1	1	0		1	1	1	1	0	1	1	1	1	1	1	1	1	1	1	RP-L35, MRPL35, rpmI; large subunit ribosomal protein L35
K02919	1	1	1	1	1	1		0	0	0	0	1	1	0	0	0	0	0		0	0	0	0	1	1	1	0	1	0	0	1		0	0	0	0	0	0	1	0	1	1	0	0	0	0	0	RP-L36, MRPL36, rpmJ; large subunit ribosomal protein L36
K02877	0	0	0	0	0	0		0	0	0	0	0	0	0	0	0	0	0		0	0	0	0	0	0	0	0	0	0	0	0		0	0	0	0	0	0	0	0	0	1	0	0	0	1	0	RP-L15e, RPL15; large subunit ribosomal protein L15e
K02896	0	0	0	0	0	0		0	0	0	0	0	0	0	0	0	0	0		0	0	0	0	0	0	0	0	0	0	0	0		0	0	0	0	0	0	0	0	0	0	0	0	0	0	0	RP-L24e, RPL24; large subunit ribosomal protein L24e
K02912	0	0	0	0	0	0		0	0	0	0	0	0	0	0	0	0	0		0	0	0	0	0	0	0	0	0	0	0	0		0	0	0	0	0	0	0	0	0	0	0	0	0	0	1	RP-L32e, RPL32; large subunit ribosomal protein L32e
K09698	1	1	0	1	1	1		0	0	0	1	1	1	1	0	1	0	1		1	1	1	0	0	0	0	0	0	0	0	0		0	0	0	0	0	0	0	0	0	0	0	0	0	0	0	gltX; nondiscriminating glutamyl-tRNA synthetase [EC:6.1.1.24]
K02433	2	1	1	1	1	1		0	1	1	1	1	1	2	2	1	1	1		1	1	1	1	1	1	1	1	0	0	1	1		1	1	1	0	0	1	1	1	0	1	1	1	1	1	1	gatA, QRSL1; aspartyl-tRNA(Asn)/glutamyl-tRNA(Gln) amidotransferase subunit A [EC:6.3.5.6 6.3.5.7]
K02434	1	1	1	1	1	1		1	1	1	1	1	1	0	0	1	0	0		1	0	1	1	1	1	1	1	0	1	1	1		1	1	1	0	0	1	1	1	1	1	1	1	1	1	1	gatB, PET112; aspartyl-tRNA(Asn)/glutamyl-tRNA(Gln) amidotransferase subunit B [EC:6.3.5.6 6.3.5.7]
K02435	1	1	1	1	1	1		1	1	1	1	1	1	1	1	1	1	1		0	1	1	1	1	1	1	1	1	1	1	1		1	1	1	0	1	1	1	1	1	1	1	1	1	0	1	gatC, GATC; aspartyl-tRNA(Asn)/glutamyl-tRNA(Gln) amidotransferase subunit C [EC:6.3.5.6 6.3.5.7]
K09482	0	0	0	0	0	0		0	0	0	0	0	0	0	0	0	0	0		1	0	0	0	1	0	0	0	0	0	0	0		0	0	0	0	0	0	0	0	0	0	0	0	0	0	0	gatD; glutamyl-tRNA(Gln) amidotransferase subunit D [EC:6.3.5.7]
K03330	0	0	0	0	0	0		0	0	0	0	0	0	0	0	0	0	0		1	1	0	0	1	0	0	0	0	0	0	0		0	0	0	0	0	0	0	0	0	0	0	0	0	0	0	gatE; glutamyl-tRNA(Gln) amidotransferase subunit E [EC:6.3.5.7]
K01886	1	1	1	1	1	1		0	1	1	1	0	0	1	1	1	1	1		1	1	1	1	1	1	1	1	0	1	1	1		1	1	1	1	1	0	0	0	0	1	1	1	1	1	1	QARS, glnS; glutaminyl-tRNA synthetase [EC:6.1.1.18]
K01872	1	1	3	1	1	1		2	1	1	2	1	1	2	1	2	2	1		1	0	1	1	3	1	2	1	1	1	2	2		1	1	1	1	0	1	1	1	1	1	1	2	0	0	1	AARS, alaS; alanyl-tRNA synthetase [EC:6.1.1.7]
K01876	1	1	1	1	1	1		0	1	1	1	1	1	1	1	1	1	0		1	0	0	1	1	1	1	1	1	1	1	1		0	0	0	1	1	1	1	1	1	1	0	1	1	1	1	aspS; aspartyl-tRNA synthetase [EC:6.1.1.12]
K01893	1	1	1	1	1	0		1	1	1	1	1	1	1	0	1	0	0		1	1	0	1	1	1	1	1	1	0	1	0		1	1	1	0	1	1	1	1	1	1	1	1	1	1	1	NARS, asnS; asparaginyl-tRNA synthetase [EC:6.1.1.22]
K01880	1	1	1	1	1	2		1	1	1	1	1	1	1	0	1	1	1		0	0	1	1	1	1	2	2	0	0	1	1		2	2	2	1	1	1	1	1	1	1	1	1	1	0	1	GARS, glyS1; glycyl-tRNA synthetase [EC:6.1.1.14]
K01878	0	0	0	0	0	0		0	0	0	0	0	0	0	0	0	0	0		0	0	0	0	0	0	0	0	0	0	0	0		0	0	0	0	0	0	0	0	0	0	0	0	0	0	0	glyQ; glycyl-tRNA synthetase alpha chain [EC:6.1.1.14]
K01868	0	1	1	1	1	1		2	1	1	2	1	1	2	1	0	2	0		0	2	1	1	2	1	1	1	1	1	1	1		1	1	1	2	1	1	1	1	1	1	1	1	1	1	1	TARS, thrS; threonyl-tRNA synthetase [EC:6.1.1.3]
K01875	1	1	1	2	1	1		1	1	1	1	1	1	1	1	0	1	0		2	1	0	1	3	1	1	1	1	1	1	1		1	1	1	0	1	1	1	0	1	1	1	1	1	1	1	SARS, serS; seryl-tRNA synthetase [EC:6.1.1.11]
K01883	1	1	1	1	1	1		1	1	1	1	1	1	1	0	1	1	1		1	1	1	1	1	0	1	1	1	1	1	0		1	1	1	1	1	1	1	1	1	0	1	1	1	1	1	CARS, cysS; cysteinyl-tRNA synthetase [EC:6.1.1.16]
K01884	0	0	0	0	0	0		1	1	1	2	0	0	0	0	0	0	0		0	2	0	1	0	0	0	0	0	0	0	0		0	0	0	1	0	1	1	1	1	1	1	1	1	1	1	cysS1; cysteinyl-tRNA synthetase, unknown class [EC:6.1.1.16]
K01873	1	1	1	1	1	1		1	1	1	1	1	1	1	1	1	0	1		0	1	1	1	1	1	1	1	1	0	1	1		1	1	1	1	0	1	1	1	1	1	1	1	1	1	1	VARS, valS; valyl-tRNA synthetase [EC:6.1.1.9]
K01869	1	1	1	1	1	1		1	1	1	1	1	1	0	1	1	0	0		1	0	1	1	1	1	2	1	1	1	1	1		0	0	0	1	0	1	1	0	1	1	1	1	1	1	1	LARS, leuS; leucyl-tRNA synthetase [EC:6.1.1.4]
K01870	1	1	1	1	1	1		1	1	1	1	1	1	1	1	1	1	1		1	1	0	1	1	1	1	1	1	1	1	1		1	1	1	1	1	1	1	1	1	1	1	1	1	1	1	IARS, ileS; isoleucyl-tRNA synthetase [EC:6.1.1.5]
K04567	1	1	1	1	1	1		1	1	1	1	1	1	1	1	1	0	1		0	1	1	1	1	1	1	1	0	0	1	1		1	1	1	0	0	1	1	1	1	1	1	1	1	1	1	KARS, lysS; lysyl-tRNA synthetase, class II [EC:6.1.1.6]
K04566	0	0	0	0	0	0		0	0	0	0	0	0	0	0	0	0	0		0	0	0	0	0	0	0	0	0	0	0	0		0	0	0	1	0	0	0	0	0	0	0	0	0	0	0	lysK; lysyl-tRNA synthetase, class I [EC:6.1.1.6]
K01887	1	1	1	1	1	1		1	1	1	1	1	1	1	1	1	1	1		1	1	1	2	1	1	1	1	0	1	1	2		1	1	1	1	1	1	1	1	1	1	1	1	1	1	1	RARS, argS; arginyl-tRNA synthetase [EC:6.1.1.19]
K01881	0	1	1	1	1	1		1	1	1	1	1	1	1	1	1	1	1		0	0	0	1	1	1	1	1	0	0	1	1		1	1	1	1	1	1	1	1	1	1	1	1	1	1	0	PARS, proS; prolyl-tRNA synthetase [EC:6.1.1.15]
K01892	1	1	1	1	1	1		0	1	1	1	1	1	0	0	1	1	0		1	0	0	0	0	1	1	1	0	1	1	1		1	1	1	1	1	1	1	1	1	1	0	1	1	1	1	HARS, hisS; histidyl-tRNA synthetase [EC:6.1.1.21]
K01889	1	1	1	1	1	1		1	1	1	1	1	1	1	1	1	2	1		0	1	1	1	1	1	1	1	0	1	1	2		0	0	0	1	1	1	1	1	1	1	2	1	1	2	1	FARSA, pheS; phenylalanyl-tRNA synthetase alpha chain [EC:6.1.1.20]
K01890	1	2	1	1	1	1		1	1	1	1	1	1	1	1	1	1	1		0	1	1	1	1	1	1	1	1	1	1	1		0	0	0	1	1	1	1	2	1	1	1	1	3	2	1	FARSB, pheT; phenylalanyl-tRNA synthetase beta chain [EC:6.1.1.20]
K01866	1	1	1	1	1	1		1	1	1	1	1	1	0	1	1	1	0		0	0	0	1	1	1	1	1	1	1	1	1		1	1	1	1	1	1	0	0	0	1	1	1	1	2	1	YARS, tyrS; tyrosyl-tRNA synthetase [EC:6.1.1.1]
K01867	1	1	1	1	1	1		1	1	1	1	1	1	1	1	1	1	1		0	1	1	1	1	1	1	2	1	1	1	1		1	1	1	1	1	1	0	0	1	1	1	1	1	0	1	WARS, trpS; tryptophanyl-tRNA synthetase [EC:6.1.1.2]
K03539	0	0	0	0	0	0		0	0	0	0	0	0	0	0	0	0	0		0	0	0	0	0	0	0	0	0	0	0	0		0	0	0	0	0	0	0	0	0	0	0	0	0	0	0	RPP1, RPP30; ribonuclease P/MRP protein subunit RPP1 [EC:3.1.26.5]
K00784	1	3	4	3	4	4		2	1	1	1	0	0	1	2	1	1	1		3	2	2	1	0	3	2	1	0	2	1	1		3	3	3	3	2	3	2	1	4	3	3	3	3	3	3	rnz; ribonuclease Z [EC:3.1.26.11]
K00974	0	0	0	0	0	0		0	0	0	0	1	1	0	0	0	0	0		0	0	0	0	0	0	0	0	0	0	1	0		0	0	0	0	0	0	0	0	0	0	0	0	0	0	0	cca; tRNA nucleotidyltransferase (CCA-adding enzyme) [EC:2.7.7.72 3.1.3.- 3.1.4.-]
K14298	0	0	0	0	1	1		0	0	0	0	0	0	0	0	0	0	0		0	0	0	0	0	0	0	0	0	0	0	0		0	0	0	0	0	0	0	0	0	0	0	0	0	0	0	RAE1, GLE2; mRNA export factor
K14004	0	0	0	0	1	1		0	0	0	0	0	0	0	0	0	0	0		0	0	0	0	0	0	0	0	0	0	0	0		0	0	0	0	0	0	0	0	0	0	0	0	0	0	0	SEC13; protein transport protein SEC13
K14309	0	0	0	0	0	0		0	0	0	0	0	0	0	0	0	0	0		0	0	1	0	0	0	0	0	0	0	0	0		0	0	0	0	0	0	0	0	0	0	0	0	0	0	0	NUP93, NIC96; nuclear pore complex protein Nup93
K03113	0	0	0	0	0	0		0	0	0	0	0	0	0	0	0	0	0		1	1	1	0	1	1	0	0	1	0	0	1		0	0	0	1	0	1	0	1	1	1	1	1	1	1	1	EIF1, SUI1; translation initiation factor 1
K03265	0	0	0	0	0	0		1	0	0	1	1	1	1	1	1	0	1		0	0	0	0	0	0	0	0	0	0	0	0		0	0	0	0	0	0	0	0	0	0	0	0	0	0	0	ETF1, ERF1; peptide chain release factor subunit 1
K03685	1	1	2	0	1	1		0	1	1	1	1	1	1	1	1	1	1		1	1	1	1	1	1	1	1	1	1	1	1		0	0	0	1	1	1	1	0	1	1	1	1	1	1	0	rnc, DROSHA, RNT1; ribonuclease III [EC:3.1.26.3]
K14568	0	0	0	0	0	0		0	0	0	0	0	0	0	0	0	0	0		0	0	0	0	0	0	0	0	0	0	0	0		0	0	0	0	0	0	0	0	0	0	0	0	0	0	0	EMG1, NEP1; rRNA small subunit pseudouridine methyltransferase Nep1 [EC:2.1.1.260]
K03076	0	1	1	1	1	1		0	1	1	1	1	0	1	1	1	1	1		1	1	1	1	1	1	1	1	1	1	1	1		1	1	1	0	1	1	1	1	1	1	1	1	1	0	1	secY; preprotein translocase subunit SecY
K03073	0	1	1	1	1	1		1	0	1	1	1	1	1	0	1	0	1		2	0	0	0	0	0	0	0	0	0	1	0		0	0	0	0	0	0	0	0	0	0	0	2	0	1	0	secE; preprotein translocase subunit SecE
K03075	0	1	1	1	1	1		1	1	1	1	1	1	1	1	1	1	0		1	1	1	1	1	1	1	1	1	0	1	1		1	1	1	0	1	1	1	0	1	1	1	1	1	1	1	secG; preprotein translocase subunit SecG
K03072	1	1	1	1	1	1		0	1	1	1	1	1	0	1	1	1	1		1	1	1	0	1	1	1	1	1	1	1	1		0	0	0	1	1	0	1	1	1	0	1	1	1	0	0	secD; preprotein translocase subunit SecD
K03074	1	1	1	1	1	1		0	1	1	1	1	1	0	1	1	1	1		1	0	1	0	1	1	1	1	1	1	1	1		0	0	0	1	1	1	1	1	1	1	1	1	1	1	0	secF; preprotein translocase subunit SecF
K03210	1	1	1	0	1	1		1	1	1	1	1	1	1	1	1	1	1		1	1	1	1	1	1	1	1	1	0	1	1		1	1	1	0	0	2	1	1	1	0	1	1	1	1	1	yajC; preprotein translocase subunit YajC
K03217	1	1	1	1	1	1		0	1	1	1	1	1	0	1	1	1	1		1	0	1	1	1	1	1	1	1	1	1	1		1	1	1	1	0	1	0	1	1	1	0	1	1	0	1	yidC, spoIIIJ, OXA1, ccfA; YidC/Oxa1 family membrane protein insertase
K03070	2	1	2	1	1	1		1	1	1	1	1	1	0	1	1	1	1		0	0	2	1	1	1	1	1	1	1	1	1		1	2	2	1	1	1	1	1	1	2	1	1	1	1	1	secA; preprotein translocase subunit SecA [EC:7.4.2.8]
K03071	0	0	0	0	0	0		1	0	0	0	1	0	0	1	0	0	0		0	0	0	0	0	1	1	0	0	0	0	0		0	0	0	0	0	0	0	0	0	0	0	0	0	0	0	secB; preprotein translocase subunit SecB
K03106	1	1	1	1	1	1		1	1	1	1	1	1	1	1	1	1	1		1	1	2	1	1	1	1	1	0	1	1	1		0	0	0	1	1	1	1	1	1	1	1	1	1	1	1	SRP54, ffh; signal recognition particle subunit SRP54 [EC:3.6.5.4]
K03110	1	1	1	1	1	1		1	1	1	1	1	1	1	1	1	1	1		1	1	1	1	0	1	1	2	1	0	1	1		1	1	1	1	0	1	1	1	1	1	1	1	1	1	1	ftsY; fused signal recognition particle receptor
K03116	3	2	2	2	2	2		2	2	2	2	2	2	2	1	2	2	2		2	2	2	2	2	2	2	2	0	1	2	2		2	2	2	2	2	2	2	2	0	2	0	2	2	2	2	tatA; sec-independent protein translocase protein TatA
K03117	0	0	0	0	0	0		0	0	0	0	0	0	0	0	0	0	0		0	0	0	0	0	0	0	0	0	0	0	0		0	0	0	0	0	0	0	0	0	0	0	0	0	0	0	tatB; sec-independent protein translocase protein TatB
K03118	1	1	0	1	1	1		2	1	1	1	1	1	1	1	1	1	1		1	0	1	1	1	1	1	1	1	1	1	1		1	1	1	1	1	1	1	1	1	1	1	2	1	1	1	tatC; sec-independent protein translocase protein TatC
K03100	1	2	2	1	1	1		1	1	1	1	1	1	0	1	1	1	1		1	1	0	1	1	1	1	2	0	2	1	1		1	1	1	1	0	2	0	0	0	1	1	1	1	1	1	lepB; signal peptidase I [EC:3.4.21.89]
K03101	2	3	2	2	2	2		1	1	1	1	1	1	1	1	1	1	1		2	2	3	1	1	1	1	2	1	1	3	2		1	1	1	2	2	2	2	0	2	2	2	2	2	2	2	lspA; signal peptidase II [EC:3.4.23.36]
K13280	0	0	0	0	0	0		0	0	0	0	0	0	0	0	0	0	0		0	0	0	0	1	2	0	0	1	0	0	0		0	0	0	0	0	0	0	0	0	0	0	0	0	0	0	SEC11, sipW; signal peptidase I [EC:3.4.21.89]
K13525	0	0	0	0	0	0		0	0	0	0	0	0	0	0	0	0	0		0	0	0	0	0	0	0	0	0	0	0	0		0	0	0	0	0	0	0	0	0	0	0	0	0	0	0	VCP, CDC48; transitional endoplasmic reticulum ATPase
K04079	2	1	1	1	1	1		0	3	1	0	0	0	0	0	0	0	0		0	0	1	1	0	2	1	1	1	1	1	1		1	1	1	1	0	0	0	1	1	0	1	1	1	1	1	HSP90A, htpG; molecular chaperone HtpG
K13993	2	2	2	2	2	2		3	4	3	3	3	2	3	3	3	3	3		2	0	2	4	2	5	5	4	3	0	3	3		3	3	3	1	0	1	0	0	1	1	1	0	2	0	0	HSP20; HSP20 family protein
K11996	0	0	0	1	1	1		0	0	0	0	0	0	0	0	0	0	0		0	0	0	0	0	0	0	0	0	1	0	0		0	0	0	0	0	1	0	1	1	0	1	1	1	1	1	MOCS3, UBA4; adenylyltransferase and sulfurtransferase [EC:2.7.7.80 2.8.1.11]
K04085	1	0	1	0	1	1		0	1	1	0	0	0	0	0	0	0	0		0	0	1	0	0	0	0	0	0	0	0	0		0	0	0	0	0	0	0	0	0	0	0	0	0	0	0	tusA, sirA; tRNA 2-thiouridine synthesizing protein A [EC:2.8.1.-]
K00566	1	1	1	1	1	1		1	1	1	1	1	1	1	1	1	1	0		0	1	1	0	1	1	1	0	0	0	1	1		1	1	1	0	0	1	1	0	1	1	1	1	1	1	1	mnmA, trmU; tRNA-uridine 2-sulfurtransferase [EC:2.8.1.13]
K21232	0	0	0	0	0	0		0	0	0	0	0	0	0	0	0	0	0		0	0	0	0	0	0	0	0	0	0	0	0		0	0	0	0	0	0	0	0	0	0	0	0	0	0	0	MOCS2A, CNXG; molybdopterin synthase sulfur carrier subunit
K03636	2	2	1	2	2	2		0	3	3	0	1	1	0	0	0	0	0		0	0	0	0	0	0	0	0	0	1	0	0		2	2	2	2	2	3	2	1	2	1	2	3	3	1	2	moaD, cysO; sulfur-carrier protein
K21028	0	0	0	0	0	0		0	0	0	0	0	0	0	0	0	0	0		0	0	0	0	0	1	1	0	0	0	0	0		0	0	0	0	0	0	0	0	0	0	0	0	0	0	0	ynjE; molybdopterin synthase sulfurtransferase [EC:2.8.1.11]
K21029	1	1	0	1	1	1		0	1	1	0	1	1	0	0	0	0	0		0	0	0	0	0	0	0	0	0	1	0	0		0	0	0	0	1	1	1	1	1	0	1	1	1	1	1	moeB; molybdopterin-synthase adenylyltransferase [EC:2.7.7.80]
K21147	1	1	0	1	1	1		0	1	1	0	0	0	0	0	0	0	0		0	0	0	0	0	0	0	0	0	1	0	0		0	0	0	0	1	1	1	1	1	0	1	1	1	1	1	moeZR, moeBR; sulfur-carrier protein adenylyltransferase/sulfurtransferase [EC:2.7.7.80 2.7.7.- 2.8.1.11 2.8.1.-]
K03154	0	0	0	0	0	0		1	0	0	0	0	0	0	0	0	0	0		0	0	0	0	0	0	0	1	0	0	0	0		0	0	0	1	0	0	1	0	0	0	1	1	1	1	0	thiS; sulfur carrier protein
K12600	0	0	0	0	0	0		0	0	0	0	0	0	1	1	0	1	1		0	0	0	0	0	0	0	0	0	0	0	0		1	1	1	0	1	1	0	0	0	0	1	1	0	0	1	SKI3, TTC37; superkiller protein 3
K12615	0	0	0	0	0	0		0	0	0	0	0	0	0	0	0	0	0		0	0	0	0	0	0	0	0	0	0	0	0		0	0	0	0	0	1	0	0	0	0	1	1	1	0	0	EDC3; enhancer of mRNA-decapping protein 3
K08311	0	0	0	0	0	0		0	0	0	0	0	0	0	0	0	0	0		0	0	0	0	0	0	0	0	0	0	0	0		0	0	0	0	0	1	0	0	0	0	0	0	0	0	0	nudH; putative (di)nucleoside polyphosphate hydrolase [EC:3.6.1.-]
K03732	0	0	0	0	0	0		0	0	0	0	0	0	0	0	0	0	0		0	0	0	0	0	0	0	0	0	0	0	0		0	0	0	0	0	0	0	0	0	0	0	0	0	0	0	rhlB; ATP-dependent RNA helicase RhlB [EC:3.6.4.13]
K00962	1	1	1	1	1	1		1	1	1	1	1	1	0	1	1	1	1		1	0	1	0	1	1	1	1	0	0	2	1		1	1	1	1	1	1	1	1	1	2	1	1	1	1	2	pnp, PNPT1; polyribonucleotide nucleotidyltransferase [EC:2.7.7.8]
K11927	0	1	1	1	1	1		0	0	0	0	0	0	0	0	0	0	0		0	0	0	1	0	0	0	0	0	0	1	1		0	0	0	0	0	0	0	0	0	0	1	0	0	0	0	rhlE; ATP-dependent RNA helicase RhlE [EC:3.6.4.13]
K12573	1	1	1	1	1	1		1	1	1	1	1	1	1	1	1	1	1		1	0	1	1	1	1	1	1	1	0	1	1		1	1	1	1	1	1	1	1	0	1	1	1	1	1	1	rnr, vacB; ribonuclease R [EC:3.1.13.1]
K05592	0	0	0	0	0	0		0	1	1	1	1	1	0	0	0	0	0		0	1	1	1	2	1	2	2	0	0	0	0		0	0	0	0	0	0	0	1	2	2	0	1	1	1	0	deaD, cshA; ATP-dependent RNA helicase DeaD [EC:3.6.4.13]
K03654	1	1	1	0	0	0		0	0	0	0	0	0	0	0	0	0	0		0	0	1	1	0	1	2	1	0	1	0	0		1	1	1	1	0	1	1	0	1	1	1	1	1	1	0	recQ; ATP-dependent DNA helicase RecQ [EC:3.6.4.12]
K03628	2	2	2	2	2	1		1	3	1	2	1	1	0	0	1	1	0		1	1	1	1	1	1	2	2	2	1	1	1		2	2	2	1	1	2	1	1	2	3	2	2	2	2	2	rho; transcription termination factor Rho
K18682	3	2	2	2	2	3		2	2	2	2	2	2	1	1	2	2	2		0	1	2	1	1	1	1	1	1	1	1	1		1	2	2	2	1	2	2	0	2	2	1	2	2	2	2	rny; ribonucrease Y [EC:3.1.-.-]
K12574	0	0	0	0	0	0		0	0	0	0	0	0	0	0	0	0	0		0	0	0	0	0	0	0	0	0	0	0	0		0	0	0	0	0	0	0	0	0	0	0	0	0	0	0	rnj; ribonuclease J [EC:3.1.-.-]
K04043	0	1	1	0	1	1		0	1	1	1	1	1	1	1	1	1	1		0	0	0	1	1	1	1	1	1	0	1	0		1	1	1	1	1	1	1	0	1	1	1	1	1	1	1	dnaK, HSPA9; molecular chaperone DnaK
K04077	1	1	1	1	1	1		2	2	1	1	1	1	2	1	2	1	1		1	1	1	1	2	1	1	1	1	0	1	1		2	2	2	0	1	1	0	1	1	2	2	1	1	1	1	groEL, HSPD1; chaperonin GroEL
K02342	0	0	0	0	0	0		2	1	1	2	1	1	1	1	1	1	0		1	0	0	1	1	1	1	1	1	0	1	1		0	0	0	0	0	0	0	0	0	0	0	0	0	0	0	dnaQ; DNA polymerase III subunit epsilon [EC:2.7.7.7]
K02337	1	0	1	1	1	1		1	1	1	2	2	2	1	1	1	1	1		1	0	1	0	1	1	1	1	1	1	1	1		2	2	2	2	1	2	2	1	2	2	2	2	2	1	2	dnaE; DNA polymerase III subunit alpha [EC:2.7.7.7]
K03763	0	0	0	0	0	0		0	0	0	0	0	0	0	0	0	0	0		0	0	0	0	0	0	0	0	0	0	0	0		0	0	0	0	0	0	0	0	0	0	0	0	0	0	0	polC; DNA polymerase III subunit alpha, Gram-positive type [EC:2.7.7.7]
K02343	0	1	1	1	1	1		0	1	1	1	1	1	1	1	1	1	1		1	0	1	1	1	1	1	1	0	1	1	1		1	1	1	1	1	1	1	1	1	0	1	1	1	1	1	dnaX; DNA polymerase III subunit gamma/tau [EC:2.7.7.7]
K02341	0	1	1	1	1	1		1	1	1	1	1	1	1	2	1	2	0		1	1	1	1	1	1	1	0	1	0	1	1		0	0	0	1	0	1	1	1	1	1	1	1	1	1	1	holB; DNA polymerase III subunit delta' [EC:2.7.7.7]
K02340	1	1	1	1	1	1		1	1	1	1	1	1	1	1	1	1	1		0	1	1	1	1	1	1	1	1	0	1	1		1	1	1	1	1	1	1	1	1	1	1	1	1	1	0	holA; DNA polymerase III subunit delta [EC:2.7.7.7]
K02338	1	1	1	1	1	1		1	1	1	1	1	1	0	1	0	1	0		1	0	1	1	1	1	1	2	1	1	1	1		1	1	1	1	0	1	2	1	1	1	1	1	1	0	1	dnaN; DNA polymerase III subunit beta [EC:2.7.7.7]
K02314	0	1	1	1	1	2		1	1	1	1	1	1	1	1	1	1	1		1	1	1	0	1	1	1	0	1	1	1	1		2	2	2	1	1	1	1	1	1	1	1	1	2	1	1	dnaB; replicative DNA helicase [EC:3.6.4.12]
K02316	1	1	1	1	1	2		1	1	1	1	1	1	0	1	1	2	1		1	1	1	0	1	1	1	2	1	1	1	1		1	1	1	1	1	1	1	1	1	1	1	1	1	1	1	dnaG; DNA primase [EC:2.7.7.101]
K03111	0	2	3	3	2	2		2	2	1	1	1	1	2	2	1	2	0		2	2	3	3	3	3	3	4	2	3	3	2		3	4	4	1	1	3	2	0	2	3	4	2	4	0	2	ssb; single-strand DNA-binding protein
K03469	1	1	1	1	1	1		0	1	1	0	0	0	0	0	0	0	0		0	0	0	1	0	0	0	0	0	0	0	0		1	1	1	1	1	1	1	1	1	1	1	0	1	0	1	rnhA, RNASEH1; ribonuclease HI [EC:3.1.26.4]
K03470	1	1	1	1	1	1		0	1	1	1	1	1	1	0	0	1	1		0	0	0	1	1	1	1	1	1	1	1	1		1	1	1	1	1	1	0	0	1	1	1	1	1	1	1	rnhB; ribonuclease HII [EC:3.1.26.4]
K03471	0	0	0	0	0	0		0	0	0	0	0	0	0	0	0	0	0		1	1	1	0	0	1	1	0	0	0	0	0		0	0	0	0	0	0	0	0	0	0	0	0	0	0	0	rnhC; ribonuclease HIII [EC:3.1.26.4]
K02335	1	1	1	1	1	1		1	1	1	1	1	1	0	1	1	1	1		1	0	1	1	1	1	1	1	1	0	1	1		0	0	0	1	1	1	1	1	1	1	1	1	1	1	1	polA; DNA polymerase I [EC:2.7.7.7]
K01972	1	1	1	2	1	1		1	1	1	1	1	1	1	1	2	2	1		1	0	3	1	1	2	2	1	1	1	1	1		1	1	1	1	1	1	1	1	1	1	1	1	1	1	2	E6.5.1.2, ligA, ligB; DNA ligase (NAD+) [EC:6.5.1.2]
K04802	0	0	0	0	0	0		0	0	0	0	0	0	0	0	0	0	0		0	0	0	0	0	0	0	0	0	0	0	0		0	0	0	0	0	0	0	0	0	0	1	0	0	0	0	PCNA; proliferating cell nuclear antigen
K10747	0	0	1	1	1	1		0	0	0	0	0	0	1	1	0	1	1		0	0	0	0	0	0	0	0	0	0	0	0		0	0	0	0	0	0	0	0	0	0	0	0	0	0	0	LIG1; DNA ligase 1 [EC:6.5.1.1 6.5.1.6 6.5.1.7]
K10563	2	2	2	1	2	1		0	1	1	0	0	0	0	1	2	2	2		1	0	1	1	1	2	2	1	1	0	1	1		2	1	1	1	1	2	2	0	2	1	2	2	1	1	0	mutM, fpg; formamidopyrimidine-DNA glycosylase [EC:3.2.2.23 4.2.99.18]
K10773	1	1	1	1	1	1		1	1	1	2	1	1	1	1	1	1	0		1	1	0	2	1	1	1	1	1	0	2	2		2	2	2	2	1	1	1	0	2	2	2	2	2	1	2	NTH; endonuclease III [EC:4.2.99.18]
K01247	2	2	1	1	2	2		0	1	1	0	0	0	0	0	0	0	0		0	0	1	0	0	0	0	0	0	0	0	0		0	0	0	1	1	1	1	1	1	1	1	1	1	1	1	alkA; DNA-3-methyladenine glycosylase II [EC:3.2.2.21]
K01246	2	1	1	2	1	1		0	1	1	0	1	1	0	0	0	0	0		0	0	1	1	1	0	1	0	0	0	0	0		1	1	1	1	1	1	1	0	1	1	1	1	1	1	1	tag; DNA-3-methyladenine glycosylase I [EC:3.2.2.20]
K21929	1	1	1	2	1	1		1	1	1	1	2	2	1	1	1	1	1		1	1	1	1	1	1	1	0	1	1	2	1		2	2	2	2	1	3	2	2	2	3	2	2	2	2	2	udg; uracil-DNA glycosylase [EC:3.2.2.27]
K03648	0	0	0	0	0	0		0	0	0	0	0	0	0	0	0	0	0		0	0	0	0	0	0	0	0	0	0	0	0		0	0	0	0	0	0	1	0	0	0	0	0	0	0	0	UNG, UDG; uracil-DNA glycosylase [EC:3.2.2.27]
K03575	1	1	1	1	1	1		1	1	1	1	1	1	0	0	0	0	0		1	0	1	1	1	1	1	0	0	0	1	1		1	1	1	0	0	1	1	1	1	1	1	1	1	1	1	mutY; A/G-specific adenine glycosylase [EC:3.2.2.31]
K03652	0	0	0	0	0	0		0	0	0	0	0	0	0	0	0	0	0		0	0	0	0	0	0	1	0	0	0	0	0		1	1	1	1	0	1	0	1	1	1	1	1	1	1	1	MPG; DNA-3-methyladenine glycosylase [EC:3.2.2.21]
K01142	1	1	1	1	1	1		0	0	0	1	0	0	0	0	0	0	0		1	1	1	0	0	0	0	0	0	0	0	0		0	0	0	0	0	0	0	0	0	0	0	0	0	0	0	E3.1.11.2, xthA; exodeoxyribonuclease III [EC:3.1.11.2]
K01151	0	0	0	0	0	0		1	1	1	1	1	1	1	1	1	1	1		1	1	1	0	1	1	1	1	1	1	1	1		1	1	1	1	0	1	1	0	1	1	1	1	1	1	0	nfo; deoxyribonuclease IV [EC:3.1.21.2]
K07462	1	1	3	1	1	2		2	1	1	2	1	1	1	1	1	1	1		0	0	1	1	1	1	1	1	0	1	1	1		1	1	1	1	1	1	1	1	1	1	1	0	1	3	0	recJ; single-stranded-DNA-specific exonuclease [EC:3.1.-.-]
K03723	1	1	2	0	1	1		0	1	1	1	1	1	0	1	1	1	1		1	1	1	1	1	1	1	2	1	1	1	1		1	1	1	1	1	1	1	0	1	0	1	1	1	0	0	mfd; transcription-repair coupling factor (superfamily II helicase) [EC:3.6.4.-]
K03701	1	1	2	1	1	1		2	1	1	2	1	1	2	2	3	2	3		1	1	1	1	2	1	2	3	1	1	1	2		3	3	3	2	0	2	1	0	1	1	1	1	0	1	1	uvrA; excinuclease ABC subunit A
K03702	1	1	1	1	1	1		1	1	1	1	1	1	0	1	1	1	1		0	0	1	1	1	1	1	1	1	1	1	1		0	0	0	1	1	1	1	0	1	1	2	3	1	1	1	uvrB; excinuclease ABC subunit B
K03703	1	1	1	1	1	1		1	1	1	1	1	0	1	1	1	1	1		0	1	1	1	1	1	1	1	1	0	1	1		1	1	1	1	1	1	1	0	1	1	2	1	0	1	1	uvrC; excinuclease ABC subunit C
K03657	5	4	3	4	4	4		1	2	2	3	3	3	2	2	2	2	2		2	1	2	2	3	2	2	1	2	2	3	3		2	2	2	1	2	3	2	2	3	3	3	3	2	1	2	uvrD, pcrA; DNA helicase II / ATP-dependent DNA helicase PcrA [EC:3.6.4.12]
K03555	1	1	1	0	1	1		0	1	1	1	1	1	1	0	1	1	1		0	0	1	0	1	1	1	0	1	1	1	1		1	1	1	0	0	1	1	1	1	1	1	1	1	1	1	mutS; DNA mismatch repair protein MutS
K07456	1	1	1	1	1	1		1	1	1	1	1	1	1	0	0	0	0		1	1	0	1	1	1	1	1	1	1	3	1		1	1	1	0	0	1	1	0	0	1	1	1	1	1	1	mutS2; DNA mismatch repair protein MutS2
K03572	1	1	1	1	1	1		0	1	1	1	1	1	0	0	0	1	0		1	0	1	1	0	1	1	1	0	1	1	1		1	1	1	0	0	1	1	1	1	0	1	1	1	1	1	mutL; DNA mismatch repair protein MutL
K01141	0	0	0	0	0	0		0	0	0	0	0	0	0	0	0	0	0		0	0	0	0	0	0	0	0	0	0	0	0		1	1	1	0	1	0	0	0	0	0	0	0	0	0	0	sbcB, exoI; exodeoxyribonuclease I [EC:3.1.11.1]
K03601	1	1	1	1	1	1		1	1	0	1	1	1	1	1	1	1	1		1	1	1	1	1	1	1	0	1	1	1	1		1	2	2	0	0	1	1	1	1	1	1	1	1	1	1	xseA; exodeoxyribonuclease VII large subunit [EC:3.1.11.6]
K03602	1	1	1	1	1	1		0	1	0	1	1	1	1	1	1	1	1		1	1	1	1	1	1	1	0	1	1	1	1		1	1	1	0	0	1	1	1	1	1	1	1	1	1	1	xseB; exodeoxyribonuclease VII small subunit [EC:3.1.11.6]
K06223	0	0	0	3	0	0		0	0	0	0	0	0	0	0	0	0	0		0	0	0	0	0	0	0	0	1	2	2	0		1	1	1	0	1	2	0	1	0	0	1	1	2	1	1	dam; DNA adenine methylase [EC:2.1.1.72]
K03629	1	1	1	0	1	1		1	1	1	1	1	1	0	1	0	1	0		1	0	1	1	1	1	1	2	1	1	1	1		1	1	1	1	0	1	1	1	1	1	1	1	1	0	1	recF; DNA replication and repair protein RecF
K03584	2	1	1	1	1	1		1	1	1	1	1	1	1	0	1	1	1		1	0	1	1	1	1	1	0	1	1	1	1		1	1	1	1	0	1	1	1	1	0	1	1	1	1	1	recO; DNA repair protein RecO (recombination protein O)
K06187	1	1	1	1	1	1		1	1	1	1	1	1	1	1	1	1	1		1	0	1	1	1	1	1	1	0	1	1	1		1	1	1	1	1	1	1	1	1	1	1	1	1	1	1	recR; recombination protein RecR
K03553	0	1	1	1	1	1		1	1	1	1	1	1	1	1	1	1	0		1	0	1	2	1	1	1	1	1	1	1	1		1	1	1	1	1	1	0	1	1	1	1	1	1	1	1	recA; recombination protein RecA
K03550	1	1	1	1	1	1		1	2	1	1	1	1	1	1	2	1	1		1	1	1	1	1	1	1	1	1	1	1	1		1	1	1	0	1	1	1	0	1	1	1	1	1	1	1	ruvA; holliday junction DNA helicase RuvA [EC:3.6.4.12]
K03551	1	1	1	1	1	1		0	1	1	1	1	1	1	1	1	1	2		1	2	1	2	1	1	1	1	1	2	1	1		1	1	1	0	1	1	1	1	1	1	1	1	1	1	1	ruvB; holliday junction DNA helicase RuvB [EC:3.6.4.12]
K01159	1	1	2	1	1	1		1	2	1	1	1	1	1	1	1	1	1		1	1	1	1	1	1	1	1	1	1	1	1		1	1	1	1	1	1	1	0	1	1	1	1	1	1	1	ruvC; crossover junction endodeoxyribonuclease RuvC [EC:3.1.22.4]
K03655	0	1	1	1	1	1		1	1	1	1	1	1	1	1	0	1	1		1	1	0	1	1	1	1	1	1	1	1	1		1	1	1	1	1	1	1	1	1	0	0	1	1	1	1	recG; ATP-dependent DNA helicase RecG [EC:3.6.4.12]
K03582	0	0	0	0	0	0		0	1	1	0	0	0	0	0	0	0	0		0	0	0	0	0	0	0	0	0	0	0	0		1	1	1	1	1	0	0	0	0	0	0	0	0	0	0	recB; exodeoxyribonuclease V beta subunit [EC:3.1.11.5]
K03583	0	0	0	0	0	0		0	1	1	0	0	0	0	0	0	0	0		0	0	0	0	0	0	0	0	0	0	0	0		1	1	1	1	1	0	0	0	0	0	0	0	0	0	0	recC; exodeoxyribonuclease V gamma subunit [EC:3.1.11.5]
K03581	0	0	0	0	0	0		0	2	2	1	1	1	1	1	0	1	1		0	0	0	0	0	0	0	0	0	0	0	0		1	1	1	1	1	0	0	0	0	0	0	1	0	0	0	recD; exodeoxyribonuclease V alpha subunit [EC:3.1.11.5]
K04066	1	1	1	1	1	1		1	1	1	1	1	1	1	1	1	2	1		1	1	1	1	1	1	1	0	0	0	1	1		1	1	1	1	0	1	1	1	1	1	1	1	1	1	1	priA; primosomal protein N' (replication factor Y) (superfamily II helicase) [EC:3.6.4.-]
K10979	1	1	1	1	1	1		0	1	2	0	0	0	0	0	0	0	0		0	0	0	0	0	0	0	0	0	0	0	0		1	1	1	0	1	1	1	0	1	1	1	1	1	1	1	ku; DNA end-binding protein Ku
K01971	0	0	0	0	0	0		0	1	1	0	0	0	0	0	0	0	0		0	0	0	0	0	0	1	0	0	0	0	0		1	1	1	0	1	1	1	0	1	1	1	1	1	1	1	ligD; bifunctional non-homologous end joining protein LigD [EC:6.5.1.1]
K05772	0	0	0	0	0	0		0	0	0	0	0	0	0	0	0	0	0		0	0	0	0	0	0	0	0	0	0	1	0		0	0	0	0	0	0	0	0	0	0	0	0	0	0	0	tupA, vupA; tungstate transport system substrate-binding protein
K05773	0	0	0	0	0	0		0	0	0	0	0	0	0	0	0	0	0		0	0	0	0	0	0	0	0	0	0	1	0		0	0	0	0	0	0	0	0	0	0	0	0	0	0	0	tupB, vupB; tungstate transport system permease protein
K02020	0	1	1	1	1	0		0	1	1	0	0	0	0	0	0	0	0		0	0	0	0	0	0	0	0	0	0	0	0		1	1	1	0	1	1	1	1	1	1	1	1	1	1	1	modA; molybdate transport system substrate-binding protein
K02018	0	1	1	0	1	1		0	1	0	0	0	0	0	0	0	0	0		0	0	0	0	0	0	0	0	0	0	0	0		1	1	1	0	1	1	1	1	1	1	1	1	1	1	1	modB; molybdate transport system permease protein
K02017	0	1	0	1	1	0		0	0	0	0	0	0	0	0	0	0	0		0	0	0	0	0	0	0	0	0	0	0	0		1	1	1	0	1	0	0	0	0	0	0	0	0	0	0	modC; molybdate transport system ATP-binding protein [EC:7.3.2.5]
K02012	1	1	1	1	1	1		0	1	1	0	1	1	0	0	0	0	0		0	1	0	0	0	0	0	0	0	0	0	0		2	2	2	1	0	0	0	0	0	0	0	0	0	0	0	afuA, fbpA; iron(III) transport system substrate-binding protein
K02011	0	1	1	1	1	1		0	1	1	0	1	1	0	0	0	0	0		0	1	0	0	0	0	0	0	0	0	0	0		1	1	1	0	0	0	0	0	0	0	0	0	0	0	0	afuB, fbpB; iron(III) transport system permease protein
K02010	0	1	0	0	1	1		0	0	0	0	0	0	0	0	0	0	0		0	0	0	0	0	0	0	0	0	0	0	0		0	0	0	1	0	0	0	0	0	0	0	0	0	0	0	afuC, fbpC; iron(III) transport system ATP-binding protein [EC:7.2.2.7]
K11069	0	0	0	0	0	0		0	0	0	0	0	0	0	0	0	0	0		0	0	0	0	0	0	0	0	0	0	1	0		0	0	0	0	0	0	0	0	0	0	0	0	0	0	0	potD; spermidine/putrescine transport system substrate-binding protein
K11070	0	0	0	0	0	0		0	0	0	0	0	0	0	0	0	0	0		0	0	0	0	0	0	0	1	0	0	2	0		0	0	0	0	0	0	0	0	0	0	0	0	0	0	0	potC; spermidine/putrescine transport system permease protein
K11071	0	0	0	0	0	0		0	0	0	0	0	0	0	0	0	0	0		0	0	0	1	0	0	0	1	0	0	2	0		0	0	0	0	0	0	0	0	0	0	0	0	0	0	0	potB; spermidine/putrescine transport system permease protein
K11072	0	0	0	0	0	0		0	0	0	0	0	0	0	0	0	0	0		0	0	0	1	0	0	0	1	0	0	2	0		0	0	0	0	0	0	0	0	0	0	0	0	0	0	0	potA; spermidine/putrescine transport system ATP-binding protein [EC:7.6.2.11]
K02002	0	0	0	0	0	0		0	0	0	0	0	0	0	0	0	0	0		0	0	0	0	0	1	0	0	0	0	0	0		0	0	0	0	0	0	0	0	0	0	0	0	0	0	0	proX; glycine betaine/proline transport system substrate-binding protein
K02001	0	0	0	0	0	0		0	0	0	0	0	0	0	0	0	0	0		0	0	0	0	0	1	0	0	0	0	0	0		0	0	0	0	0	0	0	0	0	0	0	0	0	0	0	proW; glycine betaine/proline transport system permease protein
K02000	0	0	0	0	0	0		0	0	0	0	0	0	0	0	0	0	0		0	0	0	0	0	1	0	0	0	0	0	0		0	0	0	0	0	0	0	0	0	0	0	0	0	0	0	proV; glycine betaine/proline transport system ATP-binding protein [EC:7.6.2.9]
K05845	0	0	0	0	0	0		0	1	1	0	0	0	0	0	0	0	0		0	0	0	0	0	1	1	0	0	0	0	0		1	1	1	1	1	1	1	0	1	1	1	1	1	1	0	opuC; osmoprotectant transport system substrate-binding protein
K05846	0	0	0	0	0	0		0	1	1	0	0	0	0	0	0	0	0		0	0	0	0	0	2	1	0	0	0	0	0		1	1	1	1	1	1	1	0	1	1	1	1	1	1	0	opuBD; osmoprotectant transport system permease protein
K10111	0	0	0	0	0	0		0	0	0	0	0	0	0	0	0	0	0		0	0	0	0	0	0	0	1	1	0	0	0		0	0	0	0	0	0	0	0	0	0	0	0	0	0	0	malK, mtlK, thuK; multiple sugar transport system ATP-binding protein [EC:3.6.3.-]
K10112	1	1	1	1	1	1		1	1	1	1	1	1	0	1	1	0	0		1	1	1	1	1	1	0	1	1	1	1	1		0	0	0	0	0	0	1	1	1	0	1	0	0	0	0	msmX, msmK, malK, sugC, ggtA, msiK; multiple sugar transport system ATP-binding protein
K15770	1	2	2	1	1	1		1	0	0	2	1	1	0	0	2	2	2		1	0	1	0	1	0	0	1	1	0	1	1		0	0	0	0	0	0	0	0	0	0	0	0	0	0	0	cycB, ganO; arabinogalactan oligomer / maltooligosaccharide transport system substrate-binding protein
K15772	1	0	1	1	1	1		1	0	0	1	1	1	0	0	1	1	1		1	0	1	1	1	0	0	1	0	0	1	1		0	0	0	0	0	0	0	0	0	0	0	0	0	0	0	ganQ; arabinogalactan oligomer / maltooligosaccharide transport system permease protein
K10117	0	0	0	0	0	0		0	0	0	0	0	0	0	0	0	0	0		0	0	0	0	0	0	0	0	0	0	0	0		0	0	0	0	0	0	0	0	0	0	0	0	0	0	0	msmE; raffinose/stachyose/melibiose transport system substrate-binding protein
K10118	0	4	3	5	2	1		0	0	0	1	0	0	1	1	2	2	1		0	0	0	1	2	1	0	0	1	0	0	0		0	0	0	0	0	0	0	0	0	0	0	0	0	0	0	msmF; raffinose/stachyose/melibiose transport system permease protein
K10119	0	0	0	0	0	0		0	0	0	0	0	0	0	0	0	0	0		0	0	0	0	0	0	0	0	0	0	0	0		0	0	0	0	0	0	0	0	0	0	0	0	0	0	0	msmG; raffinose/stachyose/melibiose transport system permease protein
K07323	0	0	0	0	0	0		0	0	0	0	0	0	0	0	0	0	0		0	0	0	0	0	0	0	0	0	0	0	0		2	2	2	1	1	2	0	0	1	2	2	3	3	1	2	mlaC; phospholipid transport system substrate-binding protein
K02067	2	3	3	3	3	3		1	1	1	3	3	3	1	1	2	2	1		3	1	2	2	1	2	3	3	3	3	3	3		4	4	4	2	1	2	2	3	2	2	2	2	2	2	2	mlaD, linM; phospholipid/cholesterol/gamma-HCH transport system substrate-binding protein
K02066	1	3	3	3	3	3		1	1	1	3	3	3	0	0	2	2	1		2	1	2	2	2	2	3	2	4	3	3	4		4	4	4	2	1	2	2	2	2	2	2	2	2	2	2	mlaE, linK; phospholipid/cholesterol/gamma-HCH transport system permease protein
K07122	0	0	0	0	0	0		1	0	0	1	0	0	0	0	1	0	0		0	0	0	0	0	0	0	0	0	0	0	0		0	0	0	0	0	0	0	0	0	0	0	0	0	0	0	mlaB; phospholipid transport system transporter-binding protein
K02065	2	3	3	3	3	3		1	1	1	3	3	3	1	0	2	2	1		2	1	1	2	1	2	3	2	3	3	3	2		4	4	4	2	1	2	2	2	2	2	2	2	2	2	2	mlaF, linL, mkl; phospholipid/cholesterol/gamma-HCH transport system ATP-binding protein
K07335	0	1	1	0	1	1		0	0	0	0	0	0	0	0	0	0	0		0	0	0	0	0	0	0	0	0	0	0	0		0	0	0	0	0	0	0	0	0	0	0	0	0	0	0	bmpA, bmpB, tmpC; basic membrane protein A and related proteins
K10439	2	2	1	2	2	2		0	0	0	1	0	0	0	0	0	0	0		1	0	3	2	1	2	4	2	2	1	7	4		1	1	1	1	0	0	0	0	0	0	1	1	1	1	0	rbsB; ribose transport system substrate-binding protein
K10440	2	1	2	2	2	2		0	0	0	0	0	0	0	0	0	0	0		1	0	3	2	0	2	4	2	0	0	7	3		1	1	1	1	0	0	0	0	0	1	1	1	1	1	0	rbsC; ribose transport system permease protein
K10441	0	1	2	2	2	2		0	0	0	1	0	0	0	0	0	0	0		1	0	2	0	1	0	1	1	0	0	1	1		0	0	0	1	0	0	0	0	0	1	1	1	1	1	0	rbsA; ribose transport system ATP-binding protein [EC:7.5.2.7]
K06726	0	1	1	1	0	0		0	0	0	0	0	0	0	0	0	0	0		0	0	0	0	0	1	0	0	1	0	0	0		0	0	0	0	0	0	0	0	0	0	0	0	0	0	0	rbsD; D-ribose pyranase [EC:5.4.99.62]
K10543	2	0	0	0	0	0		0	1	1	0	0	0	0	0	0	0	0		0	0	0	0	0	0	0	0	0	0	0	0		0	0	0	0	0	0	0	0	0	0	0	0	0	0	0	xylF; D-xylose transport system substrate-binding protein
K10544	0	0	1	1	1	1		0	0	0	0	0	0	0	0	0	0	0		0	0	0	0	0	0	0	0	0	0	0	0		0	0	0	0	0	0	0	0	0	0	0	0	0	0	0	xylH; D-xylose transport system permease protein
K17237	0	0	0	0	0	0		0	0	0	0	0	0	0	0	0	0	0		0	0	0	0	0	0	0	0	0	0	0	0		0	0	0	0	0	0	0	0	0	0	0	0	0	0	0	inoE; inositol-phosphate transport system substrate-binding protein
K17238	0	0	0	0	0	0		0	0	0	0	0	0	0	0	0	0	0		0	0	0	0	0	0	0	0	0	0	0	0		0	0	0	0	0	0	0	0	0	0	0	0	0	0	0	inoF; inositol-phosphate transport system permease protein
K17239	0	0	0	0	0	0		0	0	0	0	0	0	0	0	0	0	0		0	0	0	0	0	0	0	0	0	0	0	0		0	0	0	0	0	0	0	0	0	0	0	0	0	0	0	inoG; inositol-phosphate transport system permease protein
K17240	0	0	0	0	0	0		0	0	0	0	0	0	0	0	0	0	0		0	0	0	0	0	0	0	0	0	0	0	0		0	0	0	0	0	0	0	0	0	0	0	0	0	0	0	inoK; inositol-phosphate transport system ATP-binding protein
K05813	0	0	0	0	0	0		0	0	0	0	0	0	0	0	0	0	0		0	0	0	0	0	0	0	1	0	0	0	0		0	0	0	0	0	0	0	0	0	0	0	0	0	0	0	ugpB; sn-glycerol 3-phosphate transport system substrate-binding protein
K05814	0	1	1	1	0	0		0	0	0	0	0	0	0	1	1	1	1		0	0	0	1	0	1	0	1	1	0	0	0		0	0	0	0	0	0	0	0	0	0	0	0	0	0	0	ugpA; sn-glycerol 3-phosphate transport system permease protein
K05815	1	1	1	1	0	0		0	0	0	0	0	0	0	1	1	1	1		0	0	0	1	0	1	0	1	1	0	0	0		0	0	0	0	0	0	0	0	0	0	0	0	0	0	0	ugpE; sn-glycerol 3-phosphate transport system permease protein
K05816	1	1	1	1	1	1		1	0	0	1	0	0	0	1	1	0	0		1	1	0	1	1	0	0	1	1	1	1	1		0	0	0	0	0	0	1	0	1	0	1	0	0	0	0	ugpC; sn-glycerol 3-phosphate transport system ATP-binding protein [EC:7.6.2.10]
K02040	4	3	4	3	3	3		1	0	0	0	2	1	0	2	0	0	0		0	0	1	1	2	1	1	2	0	1	3	3		2	2	2	0	0	0	0	0	0	0	0	0	0	0	0	pstS; phosphate transport system substrate-binding protein
K02037	0	1	1	1	1	1		1	0	0	0	2	1	0	1	1	1	0		0	0	0	1	1	0	0	0	0	1	2	2		2	2	2	0	0	0	0	0	0	0	0	0	0	0	0	pstC; phosphate transport system permease protein
K02038	0	1	1	0	1	1		1	0	0	0	2	1	0	0	1	1	0		0	0	0	2	2	0	0	0	0	1	1	1		2	2	2	0	0	0	0	0	0	0	0	0	0	0	0	pstA; phosphate transport system permease protein
K02036	0	2	2	2	2	2		1	0	0	0	2	1	0	1	1	1	1		0	0	0	3	2	0	0	0	0	1	3	2		2	2	2	0	0	0	0	0	0	0	0	0	0	0	0	pstB; phosphate transport system ATP-binding protein [EC:7.3.2.1]
K02044	0	2	0	0	0	0		0	1	1	0	1	1	0	0	0	0	0		0	1	0	0	1	0	0	0	0	0	0	0		1	1	1	0	0	1	1	0	1	1	0	1	1	1	0	phnD; phosphonate transport system substrate-binding protein
K02042	0	0	0	0	0	0		0	0	1	0	0	0	0	0	0	0	0		0	0	0	0	0	0	0	0	0	0	0	0		0	0	0	0	0	1	1	0	1	1	1	1	1	1	0	phnE; phosphonate transport system permease protein
K10003	0	0	0	0	0	0		0	0	0	0	0	0	0	0	1	0	0		0	0	0	0	0	0	0	0	0	0	0	0		0	0	0	0	0	0	0	0	0	0	0	0	0	0	0	gltJ, aatQ; glutamate/aspartate transport system permease protein
K10004	0	0	0	0	0	0		0	0	0	0	0	0	0	0	1	0	0		0	0	0	0	0	0	0	0	0	0	0	0		0	0	0	0	0	0	0	0	0	0	0	0	0	0	0	gltL, aatP; glutamate/aspartate transport system ATP-binding protein [EC:7.4.2.1]
K01999	1	1	1	0	1	1		0	0	0	1	1	1	2	2	0	2	2		0	0	0	0	0	0	0	0	0	0	0	0		0	0	0	0	0	0	1	0	1	0	1	0	1	0	0	livK; branched-chain amino acid transport system substrate-binding protein
K01997	1	0	1	0	1	1		0	0	0	1	1	1	0	0	0	0	0		0	0	0	0	0	0	0	0	0	0	0	0		0	0	0	0	0	0	0	0	0	0	0	0	0	0	0	livH; branched-chain amino acid transport system permease protein
K01998	1	0	1	0	0	0		0	0	0	1	1	1	0	0	0	0	0		0	0	0	0	0	0	0	0	0	0	0	0		0	0	0	0	0	0	0	0	0	0	0	0	0	0	0	livM; branched-chain amino acid transport system permease protein
K01995	0	0	1	0	1	1		0	0	0	1	1	1	0	0	0	0	0		0	0	0	0	0	0	0	0	0	0	0	0		0	0	0	0	0	0	0	0	0	0	0	0	0	0	0	livG; branched-chain amino acid transport system ATP-binding protein
K01996	0	0	1	0	1	1		0	0	0	1	1	1	0	0	0	0	0		0	0	0	0	0	0	0	0	0	0	0	0		1	1	1	0	0	0	0	0	0	0	0	0	0	0	0	livF; branched-chain amino acid transport system ATP-binding protein
K15581	0	0	0	0	0	0		0	0	1	0	0	0	0	0	0	0	0		0	0	0	0	0	0	0	0	0	0	0	0		0	0	0	0	0	0	0	0	0	0	0	0	0	0	0	oppB; oligopeptide transport system permease protein
K15583	0	0	0	0	0	0		0	0	0	0	0	0	0	0	0	0	0		1	0	0	0	0	0	0	0	0	0	0	0		0	0	0	0	0	0	0	0	0	0	0	0	0	0	0	oppD; oligopeptide transport system ATP-binding protein
K09815	0	0	0	0	0	0		0	0	0	0	0	0	0	0	0	0	0		0	1	0	1	1	1	1	1	0	0	1	1		0	0	0	0	0	0	0	0	0	0	0	0	0	0	0	znuA; zinc transport system substrate-binding protein
K09816	0	0	0	0	0	0		0	0	0	0	0	0	0	0	0	0	0		0	0	1	1	1	1	1	1	0	1	1	1		0	0	0	0	0	0	0	0	0	0	0	0	0	0	0	znuB; zinc transport system permease protein
K09817	0	0	0	0	0	0		0	0	0	0	0	0	0	0	0	0	0		0	1	0	1	1	1	1	1	0	1	1	1		0	0	0	0	0	0	0	0	0	0	0	0	0	0	0	znuC; zinc transport system ATP-binding protein [EC:7.2.2.-]
K11707	0	0	0	0	0	0		0	0	0	0	0	0	0	0	0	0	0		0	0	0	0	0	0	1	0	0	1	0	0		0	0	0	0	0	0	0	0	0	0	0	0	0	0	0	troA, mntA, znuA; manganese/zinc/iron transport system substrate-binding protein
K11708	0	0	0	0	0	0		0	0	0	0	0	0	0	0	0	0	0		0	0	0	0	0	0	2	0	0	0	0	0		0	0	0	0	0	0	0	0	0	0	0	0	0	0	0	troC, mntC, znuB; manganese/zinc/iron transport system permease protein
K11709	0	0	0	0	0	0		0	0	0	0	0	0	0	0	0	0	0		0	0	0	0	0	0	2	0	0	0	0	0		0	0	0	0	0	0	0	0	0	0	0	0	0	0	0	troD, mntD, znuB; manganese/zinc/iron transport system permease protein
K11710	0	0	0	0	0	0		0	0	0	0	0	0	0	0	0	0	0		0	0	0	0	0	0	1	0	0	0	0	0		0	0	0	0	0	0	0	0	0	0	0	0	0	0	0	troB, mntB, znuC; manganese/zinc/iron transport system ATP- binding protein [EC:7.2.2.5]
K02009	0	0	0	0	0	0		0	0	0	0	0	0	0	0	0	0	0		0	0	0	0	0	0	0	0	0	0	0	0		0	0	0	0	0	0	0	0	0	0	0	0	0	0	0	cbiN; cobalt/nickel transport protein
K02007	0	0	0	0	0	0		0	0	0	0	1	1	0	0	0	0	0		0	0	0	0	0	0	0	0	0	0	0	0		0	0	0	0	0	0	0	0	0	0	0	0	0	0	0	cbiM; cobalt/nickel transport system permease protein
K02008	0	0	0	0	0	0		0	0	0	0	0	0	0	0	0	0	0		0	0	0	0	0	0	0	0	0	0	0	0		0	0	0	0	0	0	0	0	0	0	0	0	0	0	0	cbiQ; cobalt/nickel transport system permease protein
K02006	0	0	0	0	0	0		0	0	0	0	0	0	0	0	0	0	0		0	0	0	0	0	0	0	0	0	0	0	0		0	0	0	1	1	0	0	0	0	0	0	0	0	0	0	cbiO; cobalt/nickel transport system ATP-binding protein
K16915	1	0	0	0	0	0		0	0	0	0	0	0	0	0	0	0	0		0	0	0	0	0	0	0	0	0	0	0	0		0	0	0	0	0	0	0	0	0	0	0	0	0	0	0	cbiL; nickel transport protein
K03523	1	1	1	1	1	1		1	1	1	1	0	1	0	1	1	1	1		1	1	0	0	1	1	1	1	1	1	1	1		1	1	1	1	1	1	0	1	1	1	1	1	1	1	0	bioY; biotin transport system substrate-specific component
K16783	0	0	0	0	0	0		0	0	0	0	0	0	0	0	0	0	0		0	0	0	0	0	0	0	0	0	0	0	0		0	0	0	0	0	0	0	0	0	0	0	0	0	0	0	bioN; biotin transport system permease protein
K16785	1	1	1	1	1	1		1	1	1	1	1	1	1	2	1	1	2		1	1	1	1	1	1	1	1	0	1	1	1		1	1	1	1	1	1	1	1	1	1	1	1	1	1	1	ecfT; energy-coupling factor transport system permease protein
K16786	1	1	1	1	1	1		0	0	0	0	1	1	0	1	0	0	1		0	0	1	2	0	1	0	1	0	1	1	1		0	0	0	1	1	0	0	0	0	0	0	0	0	0	0	ecfA1; energy-coupling factor transport system ATP-binding protein [EC:3.6.3.-]
K16787	0	0	0	0	0	0		0	0	0	0	0	0	0	1	0	0	1		0	0	0	0	0	0	0	0	0	0	0	0		0	0	0	0	0	0	0	0	0	0	0	0	0	0	0	ecfA2; energy-coupling factor transport system ATP-binding protein [EC:3.6.3.-]
K10555	0	0	0	0	0	0		0	0	0	0	0	0	0	0	0	0	0		0	0	0	0	0	0	0	0	0	0	0	0		0	0	0	0	1	0	0	0	0	0	0	0	0	0	0	lsrB; AI-2 transport system substrate-binding protein
K10556	0	0	0	0	0	0		0	0	0	0	0	0	0	0	0	0	0		0	0	0	0	0	0	0	0	0	0	0	0		0	0	0	0	1	0	0	0	0	0	0	0	0	0	0	lsrC; AI-2 transport system permease protein
K10557	0	0	0	0	0	0		0	0	0	0	0	0	0	0	0	0	0		0	0	0	0	0	0	0	0	0	0	0	0		0	0	0	0	1	0	0	0	0	0	0	0	0	0	0	lsrD; AI-2 transport system permease protein
K09690	0	0	0	0	1	1		0	0	0	0	0	0	0	0	0	0	0		0	0	0	0	0	1	1	0	0	0	0	0		0	0	0	0	0	0	0	1	0	1	0	0	0	0	0	ABC-2.LPSE.P; lipopolysaccharide transport system permease protein
K09691	0	0	2	0	1	1		0	0	0	0	0	0	0	0	0	0	0		0	0	0	0	0	1	2	0	0	0	0	0		0	0	0	0	0	0	0	0	0	1	0	0	0	0	0	ABC-2.LPSE.A; lipopolysaccharide transport system ATP-binding protein
K09694	0	0	0	0	0	0		0	0	0	0	0	0	0	0	0	0	0		0	0	0	0	0	0	0	0	0	0	0	0		0	0	0	0	0	0	0	0	0	0	0	0	0	0	0	nodJ; lipooligosaccharide transport system permease protein
K09695	0	0	0	0	0	0		0	0	0	0	0	0	0	0	0	0	0		0	0	0	0	0	0	0	0	0	0	0	0		0	0	0	0	0	0	0	0	0	0	0	0	0	0	0	nodI; lipooligosaccharide transport system ATP-binding protein
K09696	0	0	0	0	0	0		0	1	1	0	0	0	0	0	0	0	0		0	0	0	0	0	0	0	0	0	0	0	0		1	1	1	0	0	1	0	0	1	1	0	1	1	0	1	natB; sodium transport system permease protein
K09697	0	0	0	0	0	0		0	2	2	1	0	0	0	0	0	0	0		0	0	0	0	0	0	0	0	0	0	0	0		1	1	1	0	0	1	0	0	1	1	1	1	1	1	1	natA; sodium transport system ATP-binding protein [EC:7.2.2.4]
K20461	1	0	0	0	0	0		0	0	0	0	0	0	0	0	0	0	0		0	0	0	0	0	0	0	0	0	0	0	0		0	0	0	0	0	0	0	0	0	0	0	0	0	0	0	nukG, mcdG, sboG; lantibiotic transport system permease protein
K20459	1	0	0	0	0	0		0	0	0	0	0	0	0	0	0	0	0		0	0	0	0	0	0	0	0	0	0	0	0		0	0	0	0	0	0	0	0	0	0	0	0	0	0	0	nukF, mcdF, sboF; lantibiotic transport system ATP-binding protein
K09808	1	2	2	2	2	2		2	2	2	1	1	1	0	1	1	0	1		0	1	2	1	1	4	4	2	0	1	2	2		1	1	1	0	1	1	1	1	1	1	1	1	1	1	1	lolC_E; lipoprotein-releasing system permease protein
K09810	1	2	1	1	1	1		1	1	1	1	1	1	0	1	0	0	1		0	1	1	1	1	1	1	1	0	1	1	1		1	1	1	0	2	1	1	1	1	2	1	2	1	2	1	lolD; lipoprotein-releasing system ATP-binding protein [EC:3.6.3.-]
K02195	1	1	1	1	1	1		1	1	1	0	1	1	0	0	1	1	1		1	0	1	1	1	1	1	1	0	1	1	1		1	1	1	1	1	1	1	0	1	1	1	1	1	1	1	ccmC; heme exporter protein C
K02194	1	1	1	1	1	1		1	1	1	0	1	1	0	0	1	1	0		1	0	1	1	1	1	1	1	1	1	1	1		1	1	1	0	1	1	1	0	1	1	1	1	1	1	1	ccmB; heme exporter protein B
K02193	1	1	1	1	1	1		0	0	0	0	0	0	0	0	0	0	0		1	0	1	1	1	0	1	1	1	1	1	1		1	1	1	1	1	1	1	1	1	1	1	1	1	0	1	ccmA; heme exporter protein A [EC:7.6.2.5]
K07091	1	2	2	2	2	2		1	2	2	1	1	1	1	1	1	1	1		1	1	2	1	1	1	1	1	1	1	1	1		1	1	1	1	1	1	1	1	1	1	1	1	1	0	1	lptF; lipopolysaccharide export system permease protein
K11720	1	1	0	1	1	1		0	1	1	1	1	1	1	1	1	1	1		1	0	1	1	1	1	1	1	1	0	1	1		1	1	1	0	0	1	1	1	1	1	1	1	1	1	1	lptG; lipopolysaccharide export system permease protein
K06861	1	1	1	1	1	1		0	2	1	1	1	1	1	1	1	1	0		1	1	1	0	1	1	1	1	1	1	1	1		1	1	1	0	1	1	1	1	1	1	1	1	1	0	1	lptB; lipopolysaccharide export system ATP-binding protein [EC:3.6.3.-]
K16905	0	0	0	0	0	0		0	0	0	0	0	0	0	0	0	0	0		0	0	0	0	0	0	0	0	0	0	0	0		1	1	1	0	0	1	0	0	1	1	1	1	1	1	1	K16905; fluoroquinolone transport system permease protein
K16906	0	0	0	0	0	0		0	0	0	0	0	0	0	0	0	0	0		0	0	0	0	0	0	0	0	0	0	0	0		1	1	1	0	0	1	0	0	1	1	1	1	1	1	0	K16906; fluoroquinolone transport system permease protein
K16907	0	0	0	0	0	0		0	0	0	0	0	0	0	0	0	0	0		0	0	0	0	0	0	0	0	1	0	0	0		1	1	1	0	0	1	0	0	1	1	0	1	1	1	0	K16907; fluoroquinolone transport system ATP-binding protein [EC:3.6.3.-]
K19341	1	1	1	1	1	1		0	0	0	0	0	0	0	0	0	0	0		0	0	0	0	0	0	0	0	0	0	0	0		1	1	1	0	0	0	0	0	0	0	0	0	0	0	0	nosY; Cu-processing system permease protein
K09811	1	1	1	1	1	1		1	1	1	1	1	1	1	1	1	1	1		1	1	1	1	1	1	1	1	1	1	1	1		1	1	1	1	0	1	1	1	1	1	1	1	0	1	2	ftsX; cell division transport system permease protein
K09812	1	1	1	1	1	1		1	1	1	1	1	1	0	1	1	1	1		1	1	1	0	1	1	1	1	1	1	1	1		1	1	1	1	0	1	1	1	1	1	0	1	0	1	2	ftsE; cell division transport system ATP-binding protein
K11085	1	1	0	1	1	0		0	1	1	1	1	1	1	2	1	4	2		0	0	1	1	1	1	1	1	1	0	1	1		0	0	0	0	0	0	0	0	0	0	0	0	0	0	0	msbA; ATP-binding cassette, subfamily B, bacterial MsbA [EC:3.6.3.-]
K18889	1	1	1	1	1	1		0	0	1	1	1	1	0	0	0	0	0		0	0	0	1	1	1	1	1	1	1	1	1		1	1	1	1	0	1	1	0	1	0	0	1	0	1	0	mdlA, smdA; ATP-binding cassette, subfamily B, multidrug efflux pump
K18890	1	1	1	1	1	1		1	0	1	1	1	1	0	0	0	0	0		0	0	0	0	1	1	1	1	1	1	1	1		0	0	0	1	0	1	1	0	1	0	0	1	1	1	0	mdlB, smdB; ATP-binding cassette, subfamily B, multidrug efflux pump
K16012	0	0	0	0	0	0		0	0	0	1	0	0	0	0	0	0	0		0	0	0	1	1	0	0	1	0	0	0	0		0	0	0	0	0	0	0	0	0	0	0	0	0	0	0	cydC; ATP-binding cassette, subfamily C, bacterial CydC
K16013	0	0	0	0	0	0		0	0	0	1	0	0	0	0	0	0	0		0	0	0	1	1	0	0	1	0	0	0	0		0	0	0	0	0	0	0	0	0	0	0	0	0	0	0	cydD; ATP-binding cassette, subfamily C, bacterial CydD
K08483	0	1	1	1	1	0		1	1	1	2	2	2	0	0	0	1	1		0	1	2	1	1	2	1	1	0	1	1	1		1	1	1	1	1	1	1	1	1	1	1	1	1	1	1	PTS-EI.PTSI, ptsI; phosphotransferase system, enzyme I, PtsI [EC:2.7.3.9]
K12340	0	1	2	2	2	0		0	0	0	1	1	1	1	1	1	0	1		1	1	1	0	0	0	0	0	0	0	0	0		1	1	1	0	1	1	0	1	1	1	1	1	1	1	1	tolC; outer membrane protein
K03229	0	0	0	0	0	0		0	0	0	0	1	1	0	0	0	0	0		0	0	0	0	0	0	0	0	0	0	0	0		0	0	0	0	0	0	0	0	0	0	0	0	0	0	0	yscU, sctU, hrcU, ssaU; type III secretion protein U
K02453	0	0	0	0	0	0		0	0	0	0	0	0	0	0	0	0	0		0	0	0	0	0	0	0	0	0	0	0	0		0	0	0	0	0	1	1	0	0	1	0	1	1	0	0	gspD; general secretion pathway protein D
K02455	0	0	0	0	0	0		0	0	0	0	0	0	1	0	1	1	1		0	0	0	0	0	0	0	0	0	0	0	0		0	0	0	0	0	0	0	0	0	0	0	0	0	0	0	gspF; general secretion pathway protein F
K02456	0	0	0	0	0	0		1	0	0	1	2	2	1	1	0	1	1		0	0	2	0	0	0	0	0	0	0	0	0		0	0	0	0	0	0	0	0	0	0	0	0	0	0	0	gspG; general secretion pathway protein G
K02459	0	0	0	0	0	0		1	0	0	0	0	0	0	0	0	0	0		0	0	0	0	0	0	0	0	0	0	0	0		0	0	0	0	0	0	0	0	0	0	0	0	0	1	0	gspJ; general secretion pathway protein J
K02460	0	0	0	0	0	0		0	0	0	0	0	0	0	0	0	0	0		0	0	0	0	0	0	0	0	0	0	0	0		0	0	0	0	0	0	0	0	0	0	0	0	0	0	0	gspK; general secretion pathway protein K
K02454	0	0	0	0	0	0		1	2	1	3	3	2	1	2	4	3	3		0	0	2	0	0	0	0	0	0	0	0	0		0	0	0	0	0	1	1	1	1	0	1	1	1	1	2	gspE; general secretion pathway protein E [EC:7.4.2.8]
K03205	0	0	0	0	0	0		0	0	0	0	0	0	0	0	0	0	0		0	0	0	0	0	0	0	0	0	0	0	0		0	0	0	0	0	0	0	1	0	0	0	0	1	0	0	virD4, lvhD4; type IV secretion system protein VirD4 [EC:7.4.2.8]
K11904	3	1	1	3	2	2		0	0	0	0	0	0	0	0	0	0	0		0	0	0	0	0	0	0	1	0	0	0	0		0	0	0	0	0	0	0	1	0	0	0	0	0	0	0	vgrG; type VI secretion system secreted protein VgrG
K11891	1	0	1	1	1	1		0	0	0	0	0	0	0	0	0	0	0		0	0	0	2	0	0	0	0	0	0	0	0		0	0	0	0	0	0	0	1	0	0	0	0	0	0	0	impL, vasK, icmF; type VI secretion system protein ImpL
K11892	1	0	1	1	1	1		0	0	0	0	0	0	0	0	0	0	0		0	0	0	1	0	0	0	0	0	0	0	0		0	0	0	0	0	0	0	1	0	0	0	0	0	0	0	impK, ompA, vasF, dotU; type VI secretion system protein ImpK
K11907	0	0	0	1	1	1		0	0	0	0	0	0	0	0	0	0	0		0	0	0	0	0	0	0	0	0	0	0	0		0	0	0	0	0	0	0	1	0	0	0	0	0	0	0	vasG, clpV; type VI secretion system protein VasG
K07636	0	0	0	0	0	0		1	0	0	1	1	1	0	0	1	0	0		0	1	1	0	1	1	0	0	0	1	1	1		2	2	2	0	0	0	0	0	0	0	0	0	0	0	0	phoR; two-component system, OmpR family, phosphate regulon sensor histidine kinase PhoR [EC:2.7.13.3]
K07657	0	0	0	0	0	0		0	0	0	0	0	0	0	0	1	0	0		0	0	0	0	0	0	0	0	0	0	0	0		0	0	0	0	0	0	0	0	0	0	0	0	0	0	0	phoB; two-component system, OmpR family, phosphate regulon response regulator PhoB
K07658	0	0	0	0	0	0		0	0	0	0	0	0	0	0	1	0	0		0	0	0	0	0	0	1	1	0	1	0	0		0	0	0	0	0	0	0	0	0	0	0	0	0	0	0	phoB1, phoP; two-component system, OmpR family, alkaline phosphatase synthesis response regulator PhoP
K07659	1	0	0	0	0	0		0	0	0	0	0	0	0	0	0	0	0		0	0	0	0	0	0	0	0	0	0	0	0		0	0	0	0	0	0	0	0	0	0	0	0	0	0	0	ompR; two-component system, OmpR family, phosphate regulon response regulator OmpR
K07662	0	0	0	0	0	0		0	0	0	0	0	0	0	0	0	0	0		0	0	0	0	0	0	0	0	0	0	0	0		0	0	0	0	0	0	0	0	0	0	0	0	0	0	0	cpxR; two-component system, OmpR family, response regulator CpxR
K04771	2	3	2	3	3	3		2	1	2	1	2	2	1	2	2	2	2		0	0	2	1	1	2	1	1	1	1	1	0		3	3	3	1	1	1	2	1	2	1	1	2	2	1	2	degP, htrA; serine protease Do [EC:3.4.21.107]
K07664	0	0	0	0	0	0		0	0	0	0	0	0	0	0	0	0	0		0	0	0	0	0	0	0	0	0	0	0	0		0	0	0	0	0	0	0	0	0	0	0	0	0	0	0	baeR, smeR; two-component system, OmpR family, response regulator BaeR
K07798	0	2	2	4	1	1		0	1	1	1	1	1	0	0	0	0	0		1	0	0	0	0	1	1	1	1	1	0	0		2	2	2	0	0	0	0	0	1	1	1	0	1	0	1	cusB, silB; membrane fusion protein, Cu(I)/Ag(I) efflux system
K07787	0	1	1	2	1	1		1	1	1	1	1	1	0	0	0	0	0		1	0	0	0	0	1	1	1	1	0	0	0		2	2	2	0	0	0	0	0	1	1	0	0	0	0	1	cusA, silA; Cu(I)/Ag(I) efflux system membrane protein CusA/SilA
K02406	0	0	0	0	0	0		1	1	1	0	1	2	0	1	0	1	0		0	0	0	0	0	0	0	0	0	1	0	0		0	0	0	2	0	1	0	0	3	3	1	2	1	1	1	fliC; flagellin
K02405	0	0	0	0	0	0		1	1	1	1	1	1	1	1	2	1	1		0	0	1	0	0	0	0	0	0	0	0	0		0	0	0	1	2	2	2	2	2	1	2	2	2	1	2	fliA; RNA polymerase sigma factor for flagellar operon FliA
K02556	0	0	0	0	0	0		1	1	1	1	1	1	1	1	1	1	0		1	0	1	0	0	0	0	0	0	1	0	0		0	0	0	2	1	2	2	2	1	1	1	2	2	1	2	motA; chemotaxis protein MotA
K07646	1	1	2	1	2	1		0	0	0	0	0	0	0	0	0	0	0		0	0	0	1	0	0	0	0	0	0	1	0		0	0	0	0	0	0	0	0	0	0	0	0	0	0	0	kdpD; two-component system, OmpR family, sensor histidine kinase KdpD [EC:2.7.13.3]
K07667	1	1	1	0	0	0		0	0	0	0	0	0	0	0	0	0	0		0	0	0	1	0	0	0	0	0	0	1	0		0	0	0	0	0	0	0	0	0	0	0	0	0	0	0	kdpE; two-component system, OmpR family, KDP operon response regulator KdpE
K01546	1	2	1	1	0	0		0	0	0	0	0	0	0	0	0	0	0		0	0	0	0	0	0	0	0	0	0	1	0		0	0	0	0	0	0	0	0	0	0	0	0	0	0	0	kdpA; potassium-transporting ATPase potassium-binding subunit
K01547	1	1	1	1	0	0		0	0	0	0	0	0	0	0	0	0	0		0	0	0	0	0	0	0	0	0	0	1	0		0	0	0	0	0	0	0	0	0	0	0	0	0	0	0	kdpB; potassium-transporting ATPase ATP-binding subunit [EC:7.2.2.6]
K01548	1	1	1	0	0	0		0	0	0	0	0	0	0	0	0	0	0		0	0	0	0	0	0	0	0	0	0	1	0		0	0	0	0	0	0	0	0	0	0	0	0	0	0	0	kdpC; potassium-transporting ATPase KdpC subunit
K01545	1	0	1	0	0	0		0	0	0	0	0	0	0	0	0	0	0		0	0	0	0	0	0	0	0	0	0	1	0		0	0	0	0	0	0	0	0	0	0	0	0	0	0	0	kdpF; potassium-transporting ATPase KdpF subunit
K07647	0	0	0	0	0	0		0	0	0	0	0	0	1	0	1	1	1		0	1	0	0	0	0	0	0	0	1	0	0		0	0	0	0	0	0	0	0	0	0	0	0	0	0	0	torS; two-component system, OmpR family, sensor histidine kinase TorS [EC:2.7.13.3]
K07793	0	0	0	0	0	0		0	0	0	1	0	0	0	0	0	0	0		1	2	1	0	0	0	1	0	0	0	0	0		0	0	0	0	1	0	0	1	0	0	0	0	0	0	0	tctA; putative tricarboxylic transport membrane protein
K07794	0	0	0	0	0	0		0	0	0	1	0	0	0	0	0	0	0		1	1	0	0	0	0	0	0	0	0	0	0		0	0	0	0	0	0	0	0	0	0	0	0	0	0	0	tctB; putative tricarboxylic transport membrane protein
K07795	0	0	0	0	0	0		0	0	0	1	0	0	0	0	0	0	0		1	1	0	0	0	0	0	0	0	0	0	0		0	0	0	0	0	0	0	0	0	0	0	0	0	0	0	tctC; putative tricarboxylic transport membrane protein
K07652	0	0	0	0	0	0		0	0	0	0	0	0	0	0	0	0	0		1	1	0	0	0	0	0	0	0	0	0	0		0	0	0	0	0	0	0	0	0	0	0	0	0	0	0	vicK; two-component system, OmpR family, sensor histidine kinase VicK [EC:2.7.13.3]
K08372	0	0	0	0	0	0		0	0	0	0	0	0	0	0	0	0	0		0	0	0	1	0	1	0	0	0	0	0	0		0	0	0	0	0	0	0	0	0	0	0	0	0	0	0	pepD; putative serine protease PepD [EC:3.4.21.-]
K02313	1	1	1	1	1	1		1	1	1	1	1	1	0	1	0	1	1		1	0	1	2	1	1	1	2	1	0	1	0		1	1	1	1	0	1	2	0	1	1	1	1	1	0	1	dnaA; chromosomal replication initiator protein
K14205	0	1	0	0	0	0		0	0	0	0	0	0	0	0	0	0	0		0	0	0	0	0	0	0	0	0	0	0	0		0	0	0	0	0	0	0	0	0	0	0	0	0	0	0	mprF, fmtC; phosphatidylglycerol lysyltransferase [EC:2.3.2.3]
K14980	0	0	0	0	0	1		0	0	0	0	0	0	0	0	0	0	0		0	0	0	0	0	0	0	0	0	0	0	0		0	0	0	0	0	0	0	0	0	0	0	0	0	0	0	chvG; two-component system, OmpR family, sensor histidine kinase ChvG [EC:2.7.13.3]
K14981	0	0	0	0	0	0		0	0	0	0	0	0	0	0	0	0	0		0	0	0	0	0	0	0	0	0	0	0	0		0	0	0	0	0	0	0	0	0	0	0	0	0	0	0	chvI; two-component system, OmpR family, response regulator ChvI
K08641	0	1	2	1	1	1		1	1	1	1	1	1	0	0	0	0	0		1	0	1	0	1	1	1	1	0	0	0	0		0	0	0	0	0	1	0	0	0	0	1	1	1	0	0	vanX; zinc D-Ala-D-Ala dipeptidase [EC:3.4.13.22]
K20488	0	0	0	0	0	0		0	0	0	0	0	0	0	0	0	0	0		0	0	0	0	0	0	0	0	0	0	0	0		0	0	0	0	0	0	0	0	0	0	0	0	0	0	0	nisR, spaR; two-component system, OmpR family, lantibiotic biosynthesis response regulator NisR/SpaR
K20483	0	0	0	0	0	0		0	0	0	0	0	0	0	0	0	0	0		0	0	0	0	0	0	0	0	0	0	0	0		0	0	0	0	0	1	0	0	0	0	0	0	0	0	0	nisB, spaB, epiB; lantibiotic biosynthesis protein
K20484	0	0	0	0	0	0		0	0	0	0	0	0	0	0	0	0	0		0	0	0	0	0	0	0	0	0	0	0	0		0	0	0	0	0	0	0	0	0	0	0	0	0	0	0	nisC, spaC, epiC; lantibiotic biosynthesis protein
K01646	0	0	1	0	0	0		0	0	0	0	0	0	0	0	0	0	0		0	0	0	0	0	1	0	0	0	0	0	0		0	0	0	0	0	0	0	0	0	0	0	0	0	0	0	citD; citrate lyase subunit gamma (acyl carrier protein)
K01644	1	1	1	1	1	1		0	0	0	0	0	0	0	0	0	0	0		1	1	1	0	0	1	1	1	0	0	1	1		0	0	0	0	0	0	0	0	0	0	0	0	0	0	0	citE; citrate lyase subunit beta / citryl-CoA lyase [EC:4.1.3.34]
K01643	1	1	1	1	1	1		0	0	0	0	0	0	0	0	0	0	0		1	1	2	0	0	1	1	1	0	1	1	1		0	0	0	0	0	0	0	0	0	0	0	0	0	0	0	citF; citrate lyase subunit alpha / citrate CoA-transferase [EC:2.8.3.10]
K08082	3	0	1	2	2	2		0	0	0	0	0	0	1	1	1	0	0		0	0	0	0	0	0	0	0	0	0	0	0		1	1	1	0	0	1	1	0	1	0	1	1	1	1	1	algZ; two-component system, LytTR family, sensor histidine kinase AlgZ [EC:2.7.13.3]
K08083	0	0	0	1	1	1		0	0	0	0	0	0	0	0	0	0	0		0	0	0	0	0	0	0	0	0	0	0	0		0	0	0	0	0	0	0	0	0	0	0	0	0	0	0	algR; two-component system, LytTR family, response regulator AlgR
K00373	0	0	0	0	0	0		0	0	0	0	0	0	0	0	0	0	0		0	0	0	0	0	0	0	0	0	0	0	0		0	0	0	0	0	0	0	0	0	0	0	0	0	0	0	narJ, narW; nitrate reductase molybdenum cofactor assembly chaperone NarJ/NarW
K07783	0	0	0	0	0	0		0	0	0	0	0	0	0	0	0	0	0		0	0	0	0	1	0	0	0	0	0	2	1		0	0	0	0	0	0	0	0	0	0	0	0	0	0	0	uhpC; MFS transporter, OPA family, sugar phosphate sensor protein UhpC
K07678	0	0	0	0	0	0		0	0	0	0	0	0	0	0	0	0	0		0	1	1	0	0	0	0	0	0	0	0	0		0	0	0	0	0	0	0	0	0	0	0	0	0	0	0	barA, gacS, varS; two-component system, NarL family, sensor histidine kinase BarA [EC:2.7.13.3]
K07689	1	0	0	0	0	0		0	0	0	0	0	0	0	0	0	0	0		0	1	1	0	0	0	1	0	0	1	0	0		0	0	0	1	1	0	0	0	1	0	0	0	0	0	0	uvrY, gacA, varA; two-component system, NarL family, invasion response regulator UvrY
K03563	0	1	1	1	1	1		1	1	1	1	1	0	1	0	1	1	0		0	0	0	0	0	0	0	0	0	1	0	0		1	1	1	0	1	1	1	1	1	1	0	1	1	0	1	csrA; carbon storage regulator
K07679	0	0	0	0	0	0		0	0	1	0	0	0	1	0	1	1	1		1	1	0	0	0	0	0	0	0	1	0	0		0	0	0	0	0	1	1	0	1	0	1	1	1	1	1	evgS, bvgS; two-component system, NarL family, sensor histidine kinase EvgS [EC:2.7.13.3]
K01467	3	3	4	3	4	4		0	0	0	0	1	1	0	0	0	0	0		0	0	0	1	1	0	0	0	0	0	1	1		1	1	1	0	0	1	1	1	1	1	1	2	3	1	0	ampC; beta-lactamase class C [EC:3.5.2.6]
K10255	0	1	0	0	0	0		0	1	1	0	0	0	0	0	0	0	0		0	0	0	1	0	0	0	1	0	1	0	0		1	1	1	0	0	1	0	0	0	0	0	1	0	1	0	FAD6, desA; acyl-lipid omega-6 desaturase (Delta-12 desaturase) [EC:1.14.19.23 1.14.19.45]
K11622	0	1	1	1	1	1		0	0	0	0	0	0	0	0	0	0	0		1	0	1	1	1	0	0	0	1	0	0	0		1	1	1	0	0	1	1	0	1	1	1	1	1	1	2	liaF; lia operon protein LiaF
K07683	0	0	0	1	0	0		0	0	0	0	0	0	0	0	0	0	0		0	0	0	0	0	0	0	0	0	0	0	0		0	0	0	0	0	0	0	0	0	0	0	0	0	0	0	nreB; two-component system, NarL family, sensor histidine kinase NreB [EC:2.7.13.3]
K07696	0	0	0	0	0	0		0	0	0	0	0	0	0	0	0	0	0		0	0	0	0	1	0	0	0	0	0	0	1		0	0	0	0	0	0	0	0	0	0	0	0	0	0	0	nreC; two-component system, NarL family, response regulator NreC
K00990	0	0	0	0	0	0		0	0	0	1	1	1	1	1	1	1	1		0	0	0	0	0	0	0	0	0	0	0	0		0	0	0	0	0	0	0	0	0	0	0	0	0	0	0	glnD; [protein-PII] uridylyltransferase [EC:2.7.7.59]
K04751	0	0	0	1	0	1		0	0	0	1	1	1	0	0	1	0	0		0	0	0	1	0	1	1	1	0	2	1	1		0	0	0	0	0	0	0	0	0	0	0	0	0	1	0	glnB; nitrogen regulatory protein P-II 1
K07712	0	1	0	1	0	0		0	0	0	0	0	0	0	0	0	0	0		0	0	0	0	0	0	0	0	0	1	0	0		0	0	0	0	0	0	0	0	0	0	0	0	0	0	0	glnG, ntrC; two-component system, NtrC family, nitrogen regulation response regulator GlnG
K13598	2	2	1	2	2	2		0	0	0	0	0	0	0	0	0	0	0		1	1	1	1	1	1	1	1	1	1	0	0		1	1	1	0	1	1	1	1	1	1	1	0	1	1	1	ntrY; two-component system, NtrC family, nitrogen regulation sensor histidine kinase NtrY [EC:2.7.13.3]
K13599	1	2	1	2	2	1		0	0	0	2	1	1	1	0	1	1	2		1	0	2	0	1	1	1	0	1	0	1	1		1	1	1	0	0	1	1	0	1	0	1	1	1	0	1	ntrX; two-component system, NtrC family, nitrogen regulation response regulator NtrX
K02584	1	4	3	3	3	2		2	1	1	2	2	2	0	0	0	0	0		0	0	0	1	1	1	1	2	1	1	1	1		3	3	3	1	1	1	1	0	1	1	0	1	0	1	2	nifA; Nif-specific regulatory protein
K07709	0	1	1	0	0	0		0	0	0	0	1	1	0	0	0	0	0		0	0	1	0	0	1	1	1	1	0	0	0		0	0	0	0	0	0	0	0	0	0	0	0	0	0	0	zraS, hydH; two-component system, NtrC family, sensor histidine kinase HydH [EC:2.7.13.3]
K07713	0	0	0	0	0	0		1	0	0	1	2	1	1	1	2	2	2		0	0	0	0	1	1	0	0	0	0	0	0		1	1	1	0	0	0	0	0	0	0	0	0	0	0	0	zraR, hydG; two-component system, NtrC family, response regulator HydG
K07803	0	0	0	1	0	0		0	0	0	0	0	0	0	0	0	0	0		1	0	0	0	0	0	0	0	0	0	0	0		0	1	1	0	0	0	0	0	0	0	0	0	0	0	0	zraP; zinc resistance-associated protein
K07710	0	0	0	0	0	0		0	0	0	0	0	0	0	0	0	0	0		0	0	0	0	0	0	0	0	0	0	0	0		0	0	0	0	0	0	0	0	0	0	0	0	0	0	0	atoS; two-component system, NtrC family, sensor histidine kinase AtoS [EC:2.7.13.3]
K07714	1	0	1	0	0	0		2	0	0	3	4	3	2	3	3	3	3		0	0	1	0	1	1	1	0	1	0	1	1		1	1	1	0	0	0	0	0	0	0	0	0	0	0	0	atoC; two-component system, NtrC family, response regulator AtoC
K02106	0	0	0	0	0	0		0	0	0	0	0	0	0	0	0	0	0		0	0	0	0	0	0	0	0	0	0	0	0		0	0	0	0	0	0	0	0	0	0	1	0	0	0	0	atoE; short-chain fatty acids transporter
K03092	1	1	1	1	1	1		1	1	1	1	1	1	2	1	1	1	0		1	1	1	1	1	1	1	1	1	1	1	1		1	1	1	0	1	1	1	1	1	1	1	1	1	0	1	rpoN; RNA polymerase sigma-54 factor
K19641	0	0	0	0	0	0		0	0	0	0	0	0	0	0	0	0	0		0	0	0	0	0	0	0	0	0	0	0	0		0	0	0	0	0	0	0	0	0	0	0	0	0	0	0	hupR, hoxA; two-component system, NtrC family, response regulator HupR/HoxA
K03620	0	1	0	0	0	0		0	0	0	0	1	1	0	0	0	0	0		0	0	0	0	0	0	1	0	0	0	0	0		1	1	1	0	0	0	0	0	0	0	0	0	0	0	0	hyaC; Ni/Fe-hydrogenase 1 B-type cytochrome subunit
K00575	0	0	0	0	0	0		1	1	1	2	1	1	0	0	0	0	0		1	0	0	0	0	0	1	0	0	1	0	0		0	0	0	0	0	1	1	1	0	3	2	1	0	1	0	cheR; chemotaxis protein methyltransferase CheR [EC:2.1.1.80]
K13924	0	0	0	0	0	0		0	0	0	0	0	0	0	0	0	0	0		0	0	0	0	0	0	1	0	0	0	0	0		1	1	1	0	0	0	0	0	0	0	0	0	0	0	0	cheBR; two-component system, chemotaxis family, CheB/CheR fusion protein [EC:2.1.1.80 3.1.1.61]
K03406	1	0	0	0	0	0		1	1	2	3	1	1	1	1	0	1	1		1	0	0	0	0	0	0	2	1	3	0	0		1	0	0	0	0	2	1	2	1	4	2	3	1	3	1	mcp; methyl-accepting chemotaxis protein
K03408	0	0	0	0	0	0		1	1	1	1	0	0	0	0	0	1	0		1	0	0	0	0	0	0	0	0	2	0	0		0	0	0	0	0	1	0	0	0	2	0	1	0	1	0	cheW; purine-binding chemotaxis protein CheW
K03407	0	0	0	0	0	0		1	1	1	2	1	1	0	0	0	0	0		1	0	0	0	0	0	0	0	0	1	0	0		0	0	0	0	0	1	0	0	1	2	1	1	0	1	0	cheA; two-component system, chemotaxis family, sensor kinase CheA [EC:2.7.13.3]
K03413	0	0	0	0	0	0		2	1	1	2	0	0	2	2	0	1	2		2	0	0	0	0	0	1	0	0	0	0	0		0	0	0	2	1	1	0	0	1	3	1	1	0	2	0	cheY; two-component system, chemotaxis family, chemotaxis protein CheY
K03412	0	0	0	0	0	0		1	1	1	2	1	1	0	0	0	0	0		1	1	0	0	0	0	0	0	0	1	0	0		0	0	0	0	0	1	1	1	0	3	1	1	0	1	0	cheB; two-component system, chemotaxis family, protein-glutamate methylesterase/glutaminase [EC:3.1.1.61 3.5.1.44]
K13486	0	0	0	0	0	0		0	0	0	0	0	0	0	0	0	0	0		0	0	0	0	0	0	0	0	0	0	0	0		0	0	0	0	0	0	0	0	0	0	0	0	0	0	0	wspC; chemotaxis protein methyltransferase WspC
K13487	0	0	0	0	0	0		0	0	0	0	0	0	0	0	0	0	0		0	0	0	0	0	0	0	0	0	0	0	0		0	0	0	0	0	0	0	0	0	0	0	0	0	0	0	wspA; methyl-accepting chemotaxis protein WspA
K13488	0	0	0	0	0	0		0	0	0	0	0	0	0	0	0	0	0		0	0	0	0	0	0	0	0	0	0	0	0		0	0	0	0	0	0	0	0	0	0	0	0	0	0	0	wspB; chemotaxis-related protein WspB
K13489	0	0	0	0	0	0		0	0	0	0	0	0	0	0	0	0	0		0	0	0	0	0	0	0	0	0	0	0	0		0	0	0	0	0	0	0	0	0	0	0	0	0	0	0	wspD; chemotaxis-related protein WspD
K13490	0	0	0	0	0	0		0	0	0	0	0	0	0	0	0	0	0		0	0	0	0	0	0	0	0	0	0	0	0		0	0	0	0	0	0	0	0	0	0	0	0	0	0	0	wspE; two-component system, chemotaxis family, sensor histidine kinase and response regulator WspE
K13491	0	0	0	0	0	0		0	0	0	0	0	0	0	0	0	0	0		0	0	0	0	0	0	0	0	0	0	0	0		0	0	0	0	0	0	0	0	0	0	0	0	0	0	0	wspF; two-component system, chemotaxis family, response regulator WspF [EC:3.1.1.61]
K11443	2	0	2	2	1	1		3	1	1	0	0	0	2	2	2	2	2		0	1	0	0	0	0	0	0	0	0	0	0		1	1	1	2	1	2	1	0	2	3	2	1	1	1	2	divK; two-component system, cell cycle response regulator DivK
K13587	0	0	0	0	0	0		1	0	0	3	3	1	1	2	3	4	4		0	0	2	0	1	1	1	0	0	1	0	0		0	0	0	0	0	1	1	1	1	1	1	1	1	1	0	cckA; two-component system, cell cycle sensor histidine kinase and response regulator CckA [EC:2.7.13.3]
K13589	0	0	0	0	0	0		0	0	0	0	0	0	0	0	0	0	0		0	0	0	0	0	0	0	0	0	1	0	0		0	0	0	0	0	1	1	0	1	1	1	1	1	1	1	cpdR; two-component system, cell cycle response regulator CpdR
K11690	0	0	1	1	1	1		0	0	0	0	0	0	0	0	0	0	0		0	0	0	1	0	1	1	1	0	0	0	0		0	0	0	0	0	0	0	0	0	0	0	0	0	0	0	dctM; C4-dicarboxylate transporter, DctM subunit
K14978	0	0	0	0	0	0		0	0	0	0	0	0	1	0	1	1	1		0	0	0	0	0	0	0	0	0	0	0	0		0	0	0	0	0	0	0	0	0	0	1	0	0	0	1	ssrA; two-component system, LuxR family, secretion system sensor histidine kinase SsrA
K10941	1	0	1	0	0	0		0	0	0	0	0	0	0	0	0	0	0		0	0	0	0	0	0	0	0	0	0	0	0		0	0	0	0	0	0	0	0	0	0	0	0	0	0	0	fleQ, flrA; sigma-54 dependent transcriptional regulator, flagellar regulatory protein
K10943	0	0	0	0	0	0		0	0	0	1	0	0	0	0	0	0	0		0	0	0	0	0	0	0	0	0	0	0	0		0	0	0	0	0	0	0	0	0	0	0	0	0	0	0	flrC, fleR; two-component system, response regulator FlrC
K19691	0	0	0	0	0	0		2	1	1	0	0	0	1	0	1	1	1		0	0	0	0	0	0	0	0	0	0	0	0		0	0	0	1	0	1	1	0	1	0	1	1	1	1	1	NIK1, TCSC; osomolarity two-component system, sensor histidine kinase NIK1 [EC:2.7.13.3]
K10914	0	1	0	0	0	0		0	0	0	1	1	0	0	0	0	0	0		1	1	2	0	1	1	1	0	0	1	1	1		1	1	1	0	0	0	0	0	0	0	0	0	0	0	0	crp; CRP/FNR family transcriptional regulator, cyclic AMP receptor protein
K07720	0	1	0	1	0	0		0	0	0	0	0	0	0	0	0	0	0		0	0	0	0	0	0	0	0	0	1	0	0		0	0	0	0	0	1	0	0	1	1	1	1	1	1	1	yesN; two-component system, response regulator YesN
K15011	0	0	0	0	0	0		0	0	0	0	0	0	0	0	0	0	0		0	0	0	0	0	0	0	0	0	0	0	0		0	0	0	0	0	0	0	0	0	0	0	0	0	0	0	regB, regS, actS; two-component system, sensor histidine kinase RegB [EC:2.7.13.3]
K08738	0	0	0	0	0	0		0	0	0	0	0	0	0	0	0	0	0		0	0	0	0	0	0	0	0	0	0	0	0		0	0	0	0	0	0	0	0	0	0	0	0	0	0	0	CYC; cytochrome c
K01991	8	6	7	9	6	7		3	5	4	4	4	3	1	3	4	4	4		3	2	4	4	4	5	4	6	4	2	6	6		5	5	5	2	1	4	4	5	5	5	4	6	5	3	6	wza, gfcE; polysaccharide biosynthesis/export protein
K01104	1	1	1	1	1	1		0	1	1	1	1	1	1	1	0	0	1		1	1	0	0	1	0	1	0	0	0	0	0		1	1	1	1	0	1	1	0	0	0	0	0	1	1	1	E3.1.3.48; protein-tyrosine phosphatase [EC:3.1.3.48]
K07165	2	3	2	1	2	1		2	1	0	0	1	1	0	0	0	0	0		0	0	3	0	0	0	5	0	0	0	1	1		2	2	2	1	2	1	0	0	0	0	1	0	2	0	0	fecR; transmembrane sensor
K20974	0	0	0	0	0	0		0	0	0	0	0	0	0	0	0	0	0		0	0	0	0	0	0	0	0	0	0	0	0		0	0	0	0	0	0	0	0	2	1	0	0	0	0	0	K20974; two-component system, sensor histidine kinase [EC:2.7.13.3]
K20975	0	0	0	0	0	0		0	0	0	0	0	0	0	0	0	0	0		1	1	0	0	0	0	0	0	0	0	0	0		0	0	0	0	0	0	0	0	0	0	0	0	0	0	0	K20975; two-component system, sensor histidine kinase [EC:2.7.13.3]
K20976	0	0	0	0	0	0		1	1	1	0	0	0	0	0	0	0	0		1	4	0	0	0	0	0	0	0	1	0	0		0	0	0	0	0	1	1	0	1	1	1	1	1	1	0	hptB; histidine phosphotransfer protein HptB
K20978	0	0	0	0	0	0		1	1	1	1	1	1	1	1	1	1	1		0	0	0	0	0	0	0	0	0	0	0	0		0	0	0	0	0	0	0	0	0	0	0	0	0	0	0	hsbA; HptB-dependent secretion and biofilm anti anti-sigma factor
K02398	0	0	0	0	0	0		1	1	1	0	0	1	1	0	1	0	0		0	0	0	0	0	0	0	0	0	0	0	0		0	0	0	0	0	0	0	0	0	0	0	0	0	0	0	flgM; negative regulator of flagellin synthesis FlgM
K04564	2	2	2	2	2	4		1	1	1	0	0	0	0	0	0	0	0		1	0	1	1	2	1	1	0	1	0	1	0		1	1	1	0	0	1	1	1	1	1	1	1	1	1	1	SOD2; superoxide dismutase, Fe-Mn family [EC:1.15.1.1]
K17686	0	0	1	1	1	1		0	1	1	0	2	1	0	1	0	0	0		0	0	1	0	1	0	1	0	1	1	1	1		2	2	2	0	0	1	0	0	0	0	1	1	0	1	1	copA, ctpA, ATP7; P-type Cu+ transporter [EC:7.2.2.8]
K15637	0	0	0	0	0	0		0	0	0	0	0	0	0	0	0	0	0		0	0	0	0	0	0	0	0	0	0	0	0		0	0	0	0	0	0	0	0	0	0	0	1	0	0	0	PGAM5; serine/threonine-protein phosphatase PGAM5 [EC:3.1.3.16]
K14491	0	0	0	0	0	0		0	0	0	0	0	0	0	0	0	0	0		0	1	0	0	0	0	0	0	0	0	0	0		0	0	0	0	0	1	0	0	0	1	0	0	0	0	0	ARR-B; two-component response regulator ARR-B family
K05770	1	1	1	3	0	0		0	0	0	0	0	0	0	0	0	0	0		0	0	0	0	0	0	0	0	0	0	0	0		1	1	1	0	0	0	0	0	0	0	0	0	0	0	0	TSPO, BZRP; translocator protein
K13444	8	2	1	1	1	1		0	0	0	0	0	0	1	0	1	1	1		0	1	1	0	1	0	3	1	0	0	4	3		0	0	0	0	1	2	0	1	1	0	0	1	0	0	0	SUMF1, FGE; formylglycine-generating enzyme [EC:1.8.3.7]
K00477	1	2	3	3	4	4		0	1	1	0	0	0	0	0	0	0	0		0	0	0	0	0	0	0	0	0	0	0	0		2	2	2	1	0	0	0	0	0	0	0	0	0	0	0	PHYH; phytanoyl-CoA hydroxylase [EC:1.14.11.18]
K04565	1	0	1	0	1	1		0	0	0	0	0	0	0	0	0	0	0		0	0	1	0	0	1	1	0	0	0	0	0		0	0	0	1	0	1	1	1	0	1	1	1	1	1	2	SOD1; superoxide dismutase, Cu-Zn family [EC:1.15.1.1]
K06902	1	2	1	1	1	1		1	0	1	1	1	1	1	0	1	2	1		0	1	1	3	1	1	1	1	1	1	1	1		1	1	1	1	1	1	1	1	1	1	1	1	1	1	1	UMF1; MFS transporter, UMF1 family
K17987	0	0	0	0	0	0		0	0	0	0	0	0	1	0	0	0	0		0	0	0	0	0	0	0	0	0	0	0	0		0	0	0	0	0	0	0	0	0	0	0	0	0	0	0	NBR1; next to BRCA1 gene 1 protein
K01338	1	2	2	2	2	0		2	1	2	2	2	2	2	2	2	2	1		2	1	2	1	1	1	1	1	1	0	1	1		2	2	2	0	2	2	2	1	2	2	2	2	2	2	2	lon; ATP-dependent Lon protease [EC:3.4.21.53]
K03531	1	2	2	2	2	2		1	2	2	2	2	2	0	2	1	2	2		2	2	1	1	1	1	1	1	1	1	1	1		1	2	2	2	1	2	2	2	2	2	2	2	2	2	1	ftsZ; cell division protein FtsZ
K03589	1	1	1	1	1	1		1	1	1	1	1	1	0	1	1	1	1		1	0	1	1	0	0	0	1	0	0	0	0		1	1	1	1	0	1	0	1	1	0	1	1	1	1	1	ftsQ; cell division protein FtsQ
K03590	1	1	1	1	2	2		1	1	1	0	1	1	0	1	0	1	1		1	2	1	1	1	1	1	1	1	1	1	1		1	1	1	2	0	1	1	1	1	0	1	1	1	1	0	ftsA; cell division protein FtsA
K03588	1	1	1	1	1	0		1	1	1	1	0	0	0	0	1	0	1		1	0	0	1	1	1	1	1	1	1	1	1		1	1	1	1	0	1	0	1	1	1	0	1	1	1	1	ftsW, spoVE; cell division protein FtsW
K06985	0	0	0	0	0	0		0	0	0	0	0	0	0	0	0	0	0		0	0	0	0	0	0	0	0	0	0	0	0		0	0	0	0	0	0	0	0	0	0	1	0	0	0	0	K06985; aspartyl protease family protein
K11749	1	1	1	1	1	1		1	1	1	1	1	1	1	1	1	1	1		0	1	1	1	1	1	1	1	1	0	1	1		1	2	2	1	1	1	1	1	1	1	2	1	1	1	1	rseP; regulator of sigma E protease [EC:3.4.24.-]
K03544	2	1	1	1	1	1		1	1	1	1	1	1	1	1	1	1	1		2	1	1	2	2	2	2	2	1	2	3	2		2	2	2	0	1	1	1	0	1	1	1	1	1	1	2	clpX, CLPX; ATP-dependent Clp protease ATP-binding subunit ClpX
K01358	1	1	1	1	1	1		1	2	2	1	1	1	1	1	1	1	1		1	3	1	1	1	1	2	3	1	2	2	1		2	2	2	1	1	1	1	0	1	1	1	1	1	1	1	clpP, CLPP; ATP-dependent Clp protease, protease subunit [EC:3.4.21.92]
K13590	0	0	1	0	1	1		0	0	0	0	0	0	0	0	0	0	0		0	0	0	0	1	0	0	0	0	0	0	0		0	0	0	0	0	0	0	0	0	0	0	0	0	0	0	dgcB; diguanylate cyclase [EC:2.7.7.65]
K02651	0	0	0	0	0	0		0	0	0	0	0	0	0	0	0	0	0		0	0	0	0	1	1	1	0	0	0	1	4		0	0	0	0	0	0	0	0	0	0	0	0	0	0	0	flp, pilA; pilus assembly protein Flp/PilA
K01173	0	0	0	0	0	0		0	0	0	0	0	0	0	0	0	0	0		0	1	0	0	0	0	1	1	0	0	0	0		1	1	1	0	0	0	0	0	0	0	0	0	0	0	0	ENDOG; endonuclease G, mitochondrial
K03386	0	0	0	0	0	0		1	0	1	2	1	1	0	1	1	1	0		0	0	0	1	0	2	0	0	0	0	1	1		0	0	0	1	1	1	1	0	1	0	2	1	1	1	0	PRDX2_4, ahpC; peroxiredoxin (alkyl hydroperoxide reductase subunit C) [EC:1.11.1.15]
K03767	1	1	1	1	1	1		0	0	0	0	0	0	0	0	0	0	0		0	0	0	0	1	0	0	0	0	0	1	1		0	0	0	0	0	0	0	0	0	0	0	0	0	0	0	PPIA; peptidyl-prolyl cis-trans isomerase A (cyclophilin A) [EC:5.2.1.8]
K10133	1	1	1	0	1	1		0	0	0	0	0	0	0	0	0	0	0		0	0	0	0	0	0	0	0	0	0	0	0		1	1	1	0	0	1	0	0	0	0	0	1	1	1	0	TP53I3; tumor protein p53-inducible protein 3 [EC:1.-.-.-]
K22745	0	0	0	0	0	0		0	0	0	0	0	0	0	0	0	0	0		0	0	0	0	0	0	0	0	0	0	0	0		0	0	0	0	0	0	0	0	0	0	0	1	0	0	0	AIFM2; apoptosis-inducing factor 2
K10917	0	0	0	0	0	0		0	0	0	0	0	0	0	0	0	0	0		0	0	0	0	0	0	0	1	0	0	0	0		0	0	0	0	0	0	0	0	0	0	0	0	0	0	0	aphA; PadR family transcriptional regulator, regulatory protein AphA
K12990	0	0	0	1	1	1		0	0	0	0	0	0	0	0	0	0	0		0	0	0	0	0	0	0	0	0	0	0	0		0	0	0	0	0	0	0	0	0	0	0	0	0	0	0	rfbF, rhlC; rhamnosyltransferase [EC:2.4.1.-]
K20265	0	0	0	0	0	0		0	0	0	0	0	0	0	0	0	0	0		0	0	0	0	0	0	0	0	0	0	0	0		0	0	0	0	0	0	0	0	0	0	0	0	0	0	0	gadC; glutamate:GABA antiporter
K08321	0	0	0	0	0	0		0	0	0	0	0	0	0	0	0	0	0		0	0	0	0	0	0	0	0	0	0	0	0		0	0	0	0	1	0	0	0	0	0	0	0	0	0	0	lsrF; 3-hydroxy-5-phosphonooxypentane-2,4-dione thiolase [EC:2.3.1.245]
K11530	0	0	0	0	0	0		0	0	0	0	0	0	1	1	1	1	1		0	0	0	1	1	1	1	0	0	0	1	1		0	0	0	0	1	0	0	0	0	0	0	0	0	0	0	lsrG; (4S)-4-hydroxy-5-phosphonooxypentane-2,3-dione isomerase [EC:5.3.1.32]
K20527	0	0	0	0	0	1		0	0	0	0	0	0	0	0	0	0	0		0	0	0	0	0	0	0	0	0	0	0	0		0	0	0	0	0	0	0	0	0	0	0	0	0	0	0	trbB; type IV secretion system protein TrbB [EC:7.4.2.8]
K20528	1	0	0	0	0	1		0	0	0	0	0	0	0	0	0	0	0		0	0	0	0	0	0	0	0	0	0	0	0		0	0	0	0	0	0	0	0	0	0	0	0	0	0	0	trbC; type IV secretion system protein TrbC
K20529	0	0	0	0	0	1		0	0	0	0	0	0	0	0	0	0	0		0	0	0	0	0	0	0	0	0	0	0	0		0	0	0	0	0	0	0	0	0	0	0	0	0	0	0	trbD; type IV secretion system protein TrbD
K20530	0	0	0	0	0	1		0	0	0	0	0	0	0	0	0	0	0		0	0	0	0	0	0	0	0	0	0	0	0		0	0	0	0	0	0	0	0	0	0	0	0	0	0	0	trbE; type IV secretion system protein TrbE [EC:7.4.2.8]
K20266	0	0	0	0	0	1		0	0	0	0	0	0	0	0	0	0	0		0	0	0	0	0	0	0	0	0	0	0	0		0	0	0	0	0	0	0	0	0	0	0	0	0	0	0	trbJ; type IV secretion system protein TrbJ
K07344	0	0	0	0	0	1		0	0	0	0	0	0	0	0	0	0	0		0	0	0	0	0	0	0	0	0	0	0	0		0	0	0	0	0	0	0	0	0	0	0	0	0	0	0	trbL; type IV secretion system protein TrbL
K20531	0	0	0	0	0	1		0	0	0	0	0	0	0	0	0	0	0		0	0	0	0	0	0	0	0	0	0	0	0		0	0	0	0	0	0	0	0	0	0	0	0	0	0	0	trbF; type IV secretion system protein TrbF
K20532	0	0	0	0	0	1		0	0	0	0	0	0	0	0	0	0	0		0	0	0	0	0	0	0	0	0	0	0	0		0	0	0	0	0	0	0	0	0	0	0	0	0	0	0	trbG; type IV secretion system protein TrbG
K20533	0	0	0	0	0	1		0	0	0	0	0	0	0	0	0	0	0		0	0	0	0	0	0	0	0	0	0	0	0		0	0	0	0	0	0	0	0	0	0	0	0	0	0	0	trbI; type IV secretion system protein TrbI
K02053	0	0	0	0	0	0		0	0	0	0	0	0	0	0	0	0	0		0	0	0	0	0	0	0	1	0	0	0	0		0	0	0	0	0	0	0	0	0	0	0	0	0	0	0	ABC.SP.P; putative spermidine/putrescine transport system permease protein
K02054	0	0	0	0	0	0		0	0	0	0	0	0	0	0	0	0	0		0	0	0	1	0	0	0	1	0	0	0	0		0	0	0	0	0	0	0	0	0	0	0	0	0	0	0	ABC.SP.P1; putative spermidine/putrescine transport system permease protein
K02052	0	0	0	0	1	1		0	0	0	0	0	0	0	0	0	0	0		0	0	0	0	0	0	0	1	0	0	0	0		0	0	0	1	0	0	0	0	0	0	0	0	0	0	0	ABC.SP.A; putative spermidine/putrescine transport system ATP-binding protein
K13075	0	1	1	0	1	0		1	1	1	0	0	0	0	0	0	0	0		0	0	0	0	0	0	0	0	0	0	0	0		1	1	1	1	0	0	1	0	1	1	1	1	1	1	0	ahlD, aiiA, attM, blcC; N-acyl homoserine lactone hydrolase [EC:3.1.1.81]
K20276	0	0	0	0	0	0		0	0	0	0	0	0	0	0	0	0	0		0	0	0	0	0	0	0	0	0	0	0	0		0	0	0	0	0	0	0	0	0	0	0	0	0	0	0	bapA; large repetitive protein
K20326	1	1	1	0	1	1		0	2	2	0	0	0	0	0	0	0	0		0	0	0	0	0	0	0	0	0	0	0	0		1	1	1	1	0	2	2	1	2	2	1	2	0	0	0	xagA; protein XagA
K02035	1	1	0	1	1	1		1	1	0	2	1	1	0	0	1	0	0		1	0	0	0	0	0	0	1	0	1	1	1		0	0	0	1	1	1	0	1	0	0	1	1	1	1	1	ABC.PE.S; peptide/nickel transport system substrate-binding protein
K02033	1	1	1	1	1	1		1	1	2	1	1	1	0	0	0	0	0		1	0	0	0	0	0	0	2	0	1	0	0		0	0	0	1	1	1	0	2	0	1	1	1	1	1	1	ABC.PE.P; peptide/nickel transport system permease protein
K02034	1	1	1	1	1	1		1	1	2	1	1	1	1	0	0	0	0		1	0	0	1	0	0	0	2	0	1	0	0		0	0	0	0	1	1	0	2	0	0	1	1	1	1	1	ABC.PE.P1; peptide/nickel transport system permease protein
K02031	0	0	0	0	0	0		0	0	1	0	0	0	1	0	0	0	0		1	0	0	1	0	0	0	1	0	0	0	0		0	0	0	0	0	1	0	1	0	0	1	1	1	1	1	ABC.PE.A; peptide/nickel transport system ATP-binding protein
K02032	0	0	0	0	0	0		1	0	1	0	1	1	1	0	0	0	0		0	0	0	0	0	0	0	0	0	0	0	0		0	0	0	0	0	1	0	1	0	0	1	1	1	1	1	ABC.PE.A1; peptide/nickel transport system ATP-binding protein
K14645	0	2	2	1	2	2		1	1	0	0	1	1	0	0	0	0	0		1	0	1	0	0	0	0	2	0	1	0	0		3	3	3	0	0	0	0	0	0	0	0	1	0	1	0	K14645; serine protease [EC:3.4.21.-]
K05946	1	1	1	1	1	1		0	1	1	0	0	0	0	0	0	0	0		0	0	0	1	0	0	2	1	0	1	1	1		0	0	0	0	0	0	0	0	0	0	0	0	0	0	0	tagA, tarA; N-acetylglucosaminyldiphosphoundecaprenol N-acetyl-beta-D-mannosaminyltransferase [EC:2.4.1.187]
K03606	2	2	1	1	2	1		1	0	0	1	0	0	1	0	1	1	0		1	1	0	1	1	0	1	2	1	1	2	2		1	1	1	0	0	1	1	0	1	1	1	1	1	1	1	wcaJ; putative colanic acid biosysnthesis UDP-glucose lipid carrier transferase
K16554	1	2	1	2	2	2		1	1	1	2	1	1	0	1	1	1	1		0	1	1	3	1	2	3	4	3	2	2	2		2	2	2	1	0	2	0	1	0	1	1	1	2	0	2	exoP, vpsO; polysaccharide biosynthesis transport protein
K10926	0	0	0	0	0	0		0	1	0	1	0	0	0	0	0	0	0		0	0	0	0	0	0	0	0	0	0	0	0		0	0	0	0	0	0	0	0	0	0	0	0	0	0	0	mshC; MSHA pilin protein MshC
K20968	0	0	1	1	1	1		0	0	0	0	0	0	0	0	0	0	0		0	0	0	0	0	0	0	0	0	0	0	0		0	1	1	0	0	0	0	0	0	0	0	0	0	0	0	exsA; AraC family transcriptional regulator, exoenzyme S synthesis regulatory protein ExsA
K11890	1	0	1	0	1	1		0	0	0	0	0	0	0	0	0	0	0		0	0	0	1	0	0	0	0	0	0	0	0		0	0	0	0	0	0	0	1	0	0	0	0	0	0	0	impM; type VI secretion system protein ImpM
K11893	1	0	1	1	1	1		0	0	0	0	0	0	0	0	0	0	0		0	0	0	1	0	0	0	0	0	0	0	0		0	0	0	0	0	0	0	0	0	0	0	0	0	0	0	impJ, vasE; type VI secretion system protein ImpJ
K11895	1	0	1	1	1	1		0	0	0	0	0	0	0	0	0	0	0		0	0	0	0	0	0	0	0	0	0	0	0		0	0	0	0	0	0	0	1	0	0	0	0	0	0	0	impH, vasB; type VI secretion system protein ImpH
K21023	0	0	0	0	0	0		0	0	0	0	0	0	0	0	0	0	0		0	0	0	0	0	0	0	0	0	0	0	0		0	0	0	1	0	1	1	0	1	1	1	1	1	1	1	mucR; diguanylate cyclase [EC:2.7.7.65]
K20998	1	1	0	0	0	0		0	1	1	0	0	0	0	0	0	0	0		0	0	0	0	0	0	1	0	0	1	0	0		2	2	2	0	0	0	0	0	0	0	0	0	0	0	0	pslE; polysaccharide biosynthesis protein PslE
K21001	1	0	0	1	1	0		0	0	0	0	0	0	0	0	0	0	0		0	0	0	0	0	0	0	0	0	0	0	0		1	1	1	0	0	0	0	0	0	0	0	0	0	0	0	pslH; polysaccharide biosynthesis protein PslH
K21005	0	0	0	0	0	0		0	0	0	0	0	0	0	0	0	0	0		0	0	0	0	0	0	0	0	0	1	1	1		0	0	0	0	0	0	0	0	0	0	0	0	0	0	0	pslL; polysaccharide biosynthesis protein PslL
K21006	0	0	0	0	0	0		3	1	1	2	0	0	1	1	0	1	0		0	0	0	0	0	0	0	0	0	0	0	0		0	0	0	2	0	2	2	2	2	3	2	2	2	2	2	pelA; polysaccharide biosynthesis protein PelA
K21009	0	0	0	0	0	0		1	1	1	2	0	0	1	1	1	1	1		0	0	0	0	0	0	0	0	0	0	0	0		0	0	0	0	0	1	1	1	1	1	1	1	0	1	1	pelD; polysaccharide biosynthesis protein PelD
K21010	0	0	0	0	0	0		1	1	1	1	0	0	1	1	1	1	1		0	0	0	0	0	0	0	0	0	0	0	0		0	0	0	0	0	1	1	1	1	1	1	1	1	1	1	pelE; polysaccharide biosynthesis protein PelE
K21011	0	0	0	0	0	0		1	1	1	1	0	0	1	0	1	1	0		1	0	0	0	0	0	0	0	0	0	0	0		0	0	0	0	0	1	1	1	1	1	0	1	1	1	1	pelF; polysaccharide biosynthesis protein PelF
K21012	0	0	0	0	0	0		1	1	1	1	0	0	1	1	1	1	0		0	0	0	0	0	0	0	0	0	0	0	0		0	0	0	0	0	1	0	1	1	1	1	1	1	1	1	pelG; polysaccharide biosynthesis protein PelG
K06204	1	2	2	2	2	2		2	2	2	3	3	3	2	2	1	2	2		2	1	3	3	2	2	2	2	2	4	1	1		0	0	0	1	1	1	1	0	1	1	1	1	1	1	1	dksA; DnaK suppressor protein
K11936	0	0	0	0	0	0		0	0	0	0	0	0	0	0	0	0	0		0	0	1	0	0	0	0	0	0	0	0	0		0	0	0	0	0	0	0	0	0	0	0	0	0	0	0	pgaC, icaA; poly-beta-1,6-N-acetyl-D-glucosamine synthase [EC:2.4.1.-]
K04761	0	0	1	1	1	1		0	0	0	0	0	0	0	0	0	0	0		0	0	0	0	0	0	0	0	0	0	0	0		0	0	0	0	0	0	0	0	0	0	0	0	0	0	0	oxyR; LysR family transcriptional regulator, hydrogen peroxide-inducible genes activator
K03566	0	0	0	0	0	0		0	0	0	0	0	0	0	0	0	0	0		0	0	0	0	0	0	0	0	0	0	0	0		0	0	0	1	0	0	0	1	0	0	0	0	0	0	0	gcvA; LysR family transcriptional regulator, glycine cleavage system transcriptional activator
K03567	0	0	0	0	0	0		0	0	0	0	0	0	0	0	0	0	0		0	0	0	0	0	0	1	0	0	0	0	0		0	0	0	0	0	0	0	0	0	0	0	0	0	0	0	gcvR; glycine cleavage system transcriptional repressor
K03410	0	0	0	0	0	0		0	0	0	0	0	0	0	0	0	0	0		0	0	0	0	0	0	0	0	0	0	0	0		0	0	0	0	0	0	0	0	1	2	0	0	0	0	0	cheC; chemotaxis protein CheC
K03414	0	0	0	0	0	0		0	0	0	0	0	0	0	0	0	0	0		0	0	0	0	0	0	0	0	0	0	0	0		0	0	0	0	0	0	0	0	0	0	0	0	0	0	0	cheZ; chemotaxis protein CheZ
K03409	0	0	0	0	0	0		1	1	1	1	0	0	0	0	0	0	0		0	0	0	0	0	0	0	0	0	0	0	0		0	0	0	1	0	1	2	0	2	2	1	1	1	1	0	cheX; chemotaxis protein CheX
K03411	0	0	0	0	0	0		0	1	1	0	0	0	0	0	0	0	0		1	0	0	0	0	0	0	0	0	0	0	0		0	1	1	1	0	1	1	1	0	1	1	1	0	1	0	cheD; chemotaxis protein CheD [EC:3.5.1.44]
K02410	0	0	0	0	0	0		1	1	1	1	1	1	0	1	0	1	1		1	0	1	0	0	0	0	0	0	1	0	0		0	0	0	2	0	2	2	2	1	1	2	2	2	1	2	fliG; flagellar motor switch protein FliG
K02416	0	0	0	0	0	0		1	1	1	1	1	1	1	1	1	0	0		0	0	0	0	0	0	0	0	0	1	0	0		0	0	0	1	0	1	1	0	1	1	1	1	1	1	0	fliM; flagellar motor switch protein FliM
K02417	0	0	0	0	0	0		1	1	1	1	1	1	1	1	1	1	1		0	0	0	0	0	0	0	0	0	1	0	0		0	0	0	1	1	1	1	1	1	1	0	1	1	1	1	fliNY, fliN; flagellar motor switch protein FliN/FliY
K02557	0	1	1	1	1	1		0	1	1	0	1	1	1	1	1	0	0		1	0	1	0	0	0	0	0	0	1	0	0		0	0	0	1	2	3	3	3	2	2	2	3	3	3	3	motB; chemotaxis protein MotB
K02407	0	0	0	0	0	0		1	2	3	0	1	1	1	2	1	1	1		0	0	0	0	0	0	0	0	0	1	0	0		0	0	0	1	1	1	1	0	0	1	1	1	1	1	1	fliD; flagellar hook-associated protein 2
K02397	0	0	0	0	0	0		1	1	1	1	1	1	0	0	0	1	0		0	0	0	0	0	0	0	0	0	1	0	0		0	0	0	1	0	1	1	1	1	1	1	1	1	1	1	flgL; flagellar hook-associated protein 3 FlgL
K02396	0	0	0	0	0	0		1	1	1	1	1	1	1	1	0	2	0		0	0	0	0	0	0	0	0	0	1	0	0		0	0	0	1	0	0	1	1	1	1	1	1	1	1	0	flgK; flagellar hook-associated protein 1 FlgK
K02414	0	0	0	0	0	0		0	0	0	0	1	1	0	0	0	0	0		0	0	0	0	0	0	0	0	0	0	0	0		0	0	0	0	0	0	0	0	0	0	1	0	0	0	0	fliK; flagellar hook-length control protein FliK
K02389	0	0	1	1	0	2		1	1	1	1	1	1	0	1	1	0	1		1	0	1	0	0	0	0	0	1	1	0	0		1	1	1	1	1	1	1	2	2	1	0	1	1	0	1	flgD; flagellar basal-body rod modification protein FlgD
K02390	0	0	0	0	0	0		1	0	1	1	1	1	0	1	1	0	1		0	0	0	0	0	0	0	0	0	1	0	0		0	0	0	1	1	2	1	1	1	1	0	2	1	0	0	flgE; flagellar hook protein FlgE
K02391	0	0	0	0	0	0		0	0	0	0	0	0	0	0	0	0	0		0	0	0	0	0	0	0	0	0	0	0	0		0	0	0	0	0	0	0	0	0	0	0	0	0	0	0	flgF; flagellar basal-body rod protein FlgF
K02392	0	0	0	0	0	0		2	2	2	2	2	2	1	1	2	1	0		0	0	0	0	0	0	0	0	0	2	0	0		0	0	0	1	0	2	2	2	2	1	2	2	2	1	0	flgG; flagellar basal-body rod protein FlgG
K02393	0	0	0	0	0	0		1	1	1	1	1	1	1	1	0	0	1		0	0	0	0	0	0	0	0	0	1	0	0		0	0	0	1	0	1	1	2	1	0	1	1	1	0	0	flgH; flagellar L-ring protein precursor FlgH
K02394	0	0	0	0	0	0		2	1	1	1	1	1	1	1	0	1	1		0	0	0	0	0	0	0	0	0	1	0	0		0	0	0	1	0	1	1	1	1	0	0	1	1	1	0	flgI; flagellar P-ring protein precursor FlgI
K02387	0	0	0	0	0	0		1	1	1	1	1	1	0	0	1	1	1		0	0	0	0	0	0	0	0	0	1	0	0		0	0	0	1	0	1	1	1	1	1	1	1	1	0	1	flgB; flagellar basal-body rod protein FlgB
K02388	0	0	0	0	0	0		1	1	1	1	1	1	0	0	1	1	1		0	0	0	0	0	0	0	0	0	1	0	0		0	0	0	1	0	1	1	1	1	1	1	1	1	1	1	flgC; flagellar basal-body rod protein FlgC
K02408	0	0	0	0	0	0		1	1	1	1	1	1	0	0	1	1	1		0	0	0	0	0	0	0	0	0	1	0	0		0	0	0	1	0	1	1	1	1	1	1	1	1	1	1	fliE; flagellar hook-basal body complex protein FliE
K02409	0	0	0	0	0	0		1	1	1	1	1	1	0	0	1	1	1		0	0	0	0	0	0	0	0	0	1	0	0		0	0	0	1	0	1	1	1	1	1	1	1	1	2	1	fliF; flagellar M-ring protein FliF
K02400	0	0	0	0	0	0		0	1	1	1	1	1	1	1	1	1	0		0	0	0	0	0	0	0	0	0	1	0	0		1	1	1	1	1	1	1	1	1	0	1	1	1	1	1	flhA; flagellar biosynthesis protein FlhA
K02401	0	0	0	0	0	0		0	1	1	1	1	1	1	1	1	1	1		0	0	0	0	0	0	0	0	0	1	0	0		0	0	0	0	1	1	1	1	1	1	1	1	1	1	1	flhB; flagellar biosynthetic protein FlhB
K02411	0	0	0	0	0	0		1	1	1	1	1	1	0	1	0	1	0		0	0	0	0	0	0	0	0	0	1	0	0		0	0	0	1	0	1	1	1	1	0	1	1	1	1	1	fliH; flagellar assembly protein FliH
K02412	0	0	0	0	0	0		1	1	1	1	1	1	0	1	0	1	1		0	0	0	0	0	0	0	0	0	1	0	0		0	0	0	1	0	1	1	1	1	1	0	1	1	1	1	fliI; flagellum-specific ATP synthase [EC:7.4.2.8]
K02418	0	0	0	0	0	0		1	1	1	1	1	1	1	1	2	1	1		0	0	0	0	0	0	0	0	0	1	0	0		0	0	0	1	1	1	1	1	1	1	0	1	1	1	1	fliOZ, fliO; flagellar protein FliO/FliZ
K02419	0	0	0	0	0	0		1	1	1	1	1	1	1	1	1	1	1		0	0	0	0	0	0	0	0	0	1	0	0		0	0	0	1	1	1	1	1	1	0	0	1	1	1	1	fliP; flagellar biosynthetic protein FliP
K02420	0	0	0	0	0	0		1	1	1	1	1	1	1	1	1	1	1		0	0	0	0	0	0	0	0	0	1	0	0		0	0	0	1	1	1	1	1	1	0	1	1	1	1	1	fliQ; flagellar biosynthetic protein FliQ
K02421	0	0	0	0	0	0		1	1	1	1	1	1	1	0	1	1	1		0	0	0	0	0	0	0	0	0	1	0	0		0	0	0	1	1	1	1	1	1	0	1	1	1	1	1	fliR; flagellar biosynthetic protein FliR
K02399	0	0	0	0	0	0		1	0	0	0	0	0	1	1	0	1	0		0	0	0	0	0	0	0	0	0	0	0	0		0	0	0	1	0	1	1	1	1	1	1	1	1	1	0	flgN; flagella synthesis protein FlgN
K02413	0	0	0	0	0	0		1	1	1	1	1	1	0	1	0	1	1		0	0	0	0	0	0	0	0	0	1	0	0		0	0	0	1	0	1	1	1	1	1	1	1	1	1	2	fliJ; flagellar FliJ protein
K02422	0	0	0	0	0	0		1	1	1	0	1	1	1	0	1	0	1		0	0	0	0	0	0	0	0	0	1	0	0		0	0	0	1	1	2	2	0	0	2	2	2	2	2	2	fliS; flagellar protein FliS
K02386	0	0	0	0	0	0		1	1	1	0	1	1	1	1	1	0	0		0	0	0	0	0	0	0	0	0	1	0	0		0	0	0	1	0	1	1	1	1	0	1	1	1	0	0	flgA; flagella basal body P-ring formation protein FlgA
K03671	3	3	3	2	3	3		2	2	2	1	1	1	0	1	1	0	1		1	1	2	2	2	3	3	1	2	2	3	3		2	2	2	0	0	2	1	1	4	2	2	4	3	2	2	trxA; thioredoxin 1
K07192	0	0	0	0	0	0		0	1	1	0	0	0	0	0	0	0	0		0	0	1	0	0	0	1	1	0	0	0	0		0	0	0	0	0	0	0	0	0	0	1	0	0	0	0	FLOT; flotillin
K17231	1	1	1	0	1	1		0	1	1	0	0	0	0	0	0	0	0		0	0	0	0	0	0	0	0	0	0	0	0		1	1	1	1	0	1	1	0	0	1	1	1	1	1	1	IYD, DEHAL1; iodotyrosine deiodinase [EC:1.21.1.1]
K14683	0	0	0	0	0	0		0	0	0	0	0	0	0	0	0	0	0		0	1	1	1	0	0	0	0	0	1	0	0		0	0	0	1	1	0	0	0	0	0	0	0	0	0	0	SLC34A, NPT, nptA; solute carrier family 34 (sodium-dependent phosphate cotransporter)
K01283	1	1	1	3	1	1		0	0	0	1	1	1	0	0	1	1	1		1	1	1	1	1	0	1	0	1	2	1	1		1	1	1	0	0	0	1	0	1	1	0	0	0	0	0	ACE, CD143; peptidyl-dipeptidase A [EC:3.4.15.1]
K01322	0	1	0	0	0	0		0	0	0	0	0	0	0	1	1	1	1		0	0	0	0	0	0	0	0	1	0	1	2		0	0	0	0	0	1	0	1	0	1	2	0	1	0	0	PREP; prolyl oligopeptidase [EC:3.4.21.26]
K01278	0	1	1	1	2	1		1	1	2	1	1	1	1	0	1	0	1		1	0	1	0	2	1	0	0	0	0	0	1		1	1	1	1	0	1	1	0	1	2	0	1	2	2	1	DPP4, CD26; dipeptidyl-peptidase 4 [EC:3.4.14.5]
K07213	0	0	0	0	0	0		0	0	0	0	0	0	0	0	0	0	0		0	0	0	0	0	0	1	0	0	1	0	0		0	0	0	0	0	1	0	0	0	0	0	1	2	0	0	ATOX1, ATX1, copZ, golB; copper chaperone
K13985	0	0	0	0	0	0		0	1	0	1	1	1	0	0	0	0	0		0	1	0	0	0	0	0	0	1	1	0	0		1	1	1	0	0	0	0	0	0	0	0	0	0	0	0	NAPEPLD; N-acyl-phosphatidylethanolamine-hydrolysing phospholipase D [EC:3.1.4.54]
K15528	0	0	0	0	0	0		1	0	0	0	0	0	0	0	0	0	0		0	0	0	0	0	0	0	0	0	0	0	0		0	0	0	0	0	0	0	0	0	0	0	0	0	0	0	FAAH; fatty acid amide hydrolase [EC:3.5.1.99]
K03695	0	0	1	0	1	0		0	1	1	1	1	1	1	1	1	1	0		0	1	0	0	0	1	1	1	1	0	1	1		1	1	1	0	0	1	0	0	1	0	1	0	1	0	0	clpB; ATP-dependent Clp protease ATP-binding subunit ClpB
K18159	0	0	0	0	0	0		0	0	0	0	0	0	0	0	0	0	0		0	0	0	0	0	0	1	0	0	0	0	0		0	0	0	0	0	0	0	0	0	0	0	0	0	0	0	NDUFAF1, CIA30; NADH dehydrogenase [ubiquinone] 1 alpha subcomplex assembly factor 1
K11418	1	1	0	1	1	1		0	0	0	0	0	0	0	0	0	0	0		0	0	0	0	0	0	0	0	0	0	0	0		1	1	1	1	1	1	1	0	0	1	0	1	1	1	1	HDAC11; histone deacetylase 11 [EC:3.5.1.98]
K08303	0	0	0	0	0	0		0	0	0	0	0	0	0	0	0	0	0		0	2	1	1	2	1	1	0	0	0	1	1		0	0	0	0	0	0	0	0	0	0	0	0	0	0	0	K08303; putative protease [EC:3.4.-.-]
K10407	0	0	1	0	0	0		0	0	0	0	0	0	0	0	0	0	0		0	0	0	0	0	1	0	0	0	0	0	0		0	0	0	0	0	0	0	0	0	0	0	0	0	0	0	KLC; kinesin light chain
K13771	1	0	0	0	0	0		0	0	0	1	1	1	1	1	1	1	1		0	0	0	0	0	0	0	0	0	0	0	0		0	0	0	0	0	0	0	0	0	0	0	0	0	0	0	nsrR; Rrf2 family transcriptional regulator, nitric oxide-sensitive transcriptional repressor
K05916	0	0	0	0	0	0		0	0	0	0	0	0	0	0	0	0	0		0	0	0	0	0	0	0	0	0	0	0	0		0	0	0	0	0	0	1	0	0	0	0	0	0	0	0	hmp, YHB1; nitric oxide dioxygenase [EC:1.14.12.17]
K13735	2	4	1	2	4	3		3	2	1	1	1	0	0	0	2	1	2		1	0	0	3	5	7	7	4	4	3	6	7		1	1	1	0	0	1	0	0	0	0	1	0	1	0	1	yeeJ; adhesin/invasin
K03596	0	1	1	1	1	1		1	1	1	1	1	1	0	1	1	1	1		0	1	1	0	1	1	1	1	0	0	1	1		0	0	0	0	0	1	0	0	0	1	1	1	1	0	1	lepA; GTP-binding protein LepA
K01354	1	1	1	1	1	1		0	1	1	0	0	0	0	0	0	0	0		0	1	0	1	1	0	0	1	0	0	0	0		1	1	1	0	0	1	1	0	1	1	2	1	1	1	1	ptrB; oligopeptidase B [EC:3.4.21.83]
K14475	0	0	0	0	0	0		0	0	0	0	0	0	0	0	0	0	0		0	0	0	1	1	0	0	0	0	0	1	1		0	0	0	0	0	0	0	0	0	0	0	0	0	0	0	ICP; inhibitor of cysteine peptidase
K08218	0	1	1	1	1	1		0	0	0	1	1	1	0	0	0	0	0		0	0	0	0	1	1	1	1	0	1	1	1		0	0	0	0	0	1	1	0	0	1	1	1	1	1	1	ampG; MFS transporter, PAT family, beta-lactamase induction signal transducer AmpG
K02172	0	0	1	1	1	1		0	1	1	0	0	0	0	0	0	0	0		0	0	0	0	0	1	1	0	1	0	0	0		3	3	3	0	0	0	0	0	3	1	3	2	2	0	1	blaR1; bla regulator protein blaR1
K02171	1	1	2	2	2	2		1	2	2	0	0	0	0	0	0	0	0		0	0	0	1	0	1	2	0	2	1	0	0		3	3	3	0	0	2	0	0	3	2	4	2	2	0	1	blaI; BlaI family transcriptional regulator, penicillinase repressor
K17838	0	0	1	1	1	1		0	0	0	0	0	0	0	0	0	0	0		0	0	0	0	0	0	0	0	0	0	0	0		0	0	0	0	0	0	0	0	0	0	0	0	0	0	0	oxa; beta-lactamase class D [EC:3.5.2.6]
K01448	5	6	5	7	6	6		3	4	3	1	1	1	1	1	2	3	0		4	2	6	3	5	4	5	4	4	1	4	4		4	4	4	2	4	4	3	3	3	2	3	3	4	3	4	amiABC; N-acetylmuramoyl-L-alanine amidase [EC:3.5.1.28]
K13632	0	0	0	0	0	0		0	0	0	0	0	0	0	0	0	0	0		0	0	0	0	0	0	0	0	0	0	0	0		0	0	0	0	1	0	0	0	0	0	0	0	0	0	0	marA; AraC family transcriptional regulator, mar-sox-rob regulon activator
K08869	0	0	0	0	0	0		1	0	0	0	0	0	0	1	0	0	0		0	0	0	0	0	1	0	0	1	0	0	0		0	0	0	0	0	0	0	0	0	0	0	0	0	0	0	ADCK, ABC1; aarF domain-containing kinase
K12132	19	20	19	21	21	21		3	21	11	1	1	1	0	0	0	0	0		0	0	3	4	2	4	2	10	6	1	4	2		13	16	16	6	4	13	11	10	18	17	19	17	22	7	15	prkC, stkP; eukaryotic-like serine/threonine-protein kinase [EC:2.7.11.1]
K07154	0	0	0	0	0	0		0	3	1	0	0	0	0	0	0	0	0		0	0	0	0	0	0	2	0	0	0	0	0		0	0	0	0	0	0	1	4	1	1	1	0	1	0	0	hipA; serine/threonine-protein kinase HipA [EC:2.7.11.1]
K17752	0	0	0	0	0	0		0	0	0	0	0	0	0	0	0	0	0		0	0	0	0	0	0	0	0	0	0	0	0		0	0	0	0	0	0	0	0	1	0	0	0	0	0	0	rsbT; serine/threonine-protein kinase RsbT [EC:2.7.11.1]
K04757	7	8	11	10	11	11		6	6	8	6	6	6	4	5	5	5	4		5	4	7	6	5	5	5	6	5	4	5	4		9	9	9	4	5	10	8	5	8	10	10	9	8	8	9	rsbW; serine/threonine-protein kinase RsbW [EC:2.7.11.1]
K08884	19	18	17	19	19	20		2	19	11	1	1	1	0	0	0	0	0		0	0	4	4	2	4	2	10	6	2	4	2		13	16	16	6	4	12	11	10	18	17	19	17	22	7	14	K08884; serine/threonine protein kinase, bacterial [EC:2.7.11.1]
K02484	1	0	0	0	0	0		1	0	0	1	0	0	0	0	0	0	0		0	0	0	0	0	0	1	0	0	0	0	0		0	0	0	0	0	0	0	0	0	0	0	0	0	0	0	K02484; two-component system, OmpR family, sensor kinase [EC:2.7.13.3]
K02480	0	0	0	0	0	0		0	0	0	0	0	0	0	0	0	0	0		0	0	0	0	1	0	0	0	0	0	0	1		0	0	0	0	0	0	0	0	0	0	0	0	0	0	0	K02480; two-component system, NarL family, sensor kinase [EC:2.7.13.3]
K02482	2	3	3	3	3	2		4	1	0	3	3	3	0	2	2	2	1		2	2	2	1	3	2	3	1	1	1	2	2		2	2	2	1	2	4	1	1	0	1	2	4	4	0	2	K02482; two-component system, NtrC family, sensor kinase [EC:2.7.13.3]
K19694	1	0	1	0	1	1		0	0	0	0	0	0	0	0	0	0	0		0	0	0	0	0	0	0	0	0	0	0	0		0	0	0	0	0	0	0	0	0	0	0	0	0	0	0	chiS; two-component system, sensor histidine kinase ChiS
K11527	0	0	0	0	0	0		1	0	1	0	0	0	1	1	1	1	1		1	3	2	0	0	0	0	0	0	1	0	0		0	0	0	0	0	1	1	0	2	1	1	1	1	1	1	K11527; two-component system, sensor histidine kinase and response regulator [EC:2.7.13.3]
K17570	0	0	0	0	0	0		0	0	0	0	0	0	0	0	0	0	0		0	0	1	0	0	0	0	0	0	0	0	0		0	0	0	0	0	0	0	0	0	0	0	0	0	0	0	HYDIN; hydrocephalus-inducing protein
K16725	0	0	0	0	0	0		0	0	0	0	0	0	0	0	0	0	0		0	0	1	0	0	0	0	0	0	0	0	0		0	0	0	0	0	0	0	0	0	0	0	0	0	0	0	CEP192; centrosomal protein CEP192
K17592	0	0	0	0	0	0		0	0	0	0	0	0	0	0	0	0	0		0	0	0	0	0	0	0	0	0	0	0	0		0	0	0	0	0	0	0	0	0	0	0	0	0	0	0	SACS; sacsin
K17609	1	0	0	0	1	1		0	1	0	0	0	0	0	0	0	0	0		0	0	0	0	0	0	0	0	0	0	0	0		1	1	1	0	0	1	0	0	0	1	1	1	1	0	1	NXN; nucleoredoxin [EC:1.8.1.8]
K21814	0	0	0	0	0	0		0	0	0	0	0	0	0	0	0	0	0		0	0	0	0	0	0	0	0	0	0	1	1		0	0	0	0	0	0	0	0	0	0	0	0	0	0	0	CPPED1; serine/threonine-protein phosphatase CPPED1 [EC:3.1.3.16]
K20074	0	2	1	3	2	2		0	1	0	0	0	0	0	0	0	0	0		1	0	2	1	0	0	0	0	1	0	0	0		3	3	3	2	0	4	1	1	1	3	4	3	4	4	2	prpC, phpP; PPM family protein phosphatase [EC:3.1.3.16]
K17509	0	0	0	0	0	0		0	0	0	0	0	0	0	0	0	0	0		0	0	0	0	0	0	0	0	0	0	0	0		0	0	0	1	0	0	0	0	0	0	0	0	0	0	0	PDPR; pyruvate dehydrogenase phosphatase regulatory subunit
K02654	0	0	0	0	0	0		1	1	1	1	1	1	0	0	1	1	1		0	0	2	0	0	0	0	0	0	0	0	0		0	0	0	0	0	1	2	0	1	1	1	1	1	1	2	pilD, pppA; leader peptidase (prepilin peptidase) / N-methyltransferase [EC:3.4.23.43 2.1.1.-]
K02278	0	0	0	0	0	0		0	0	0	0	0	0	0	0	0	0	0		0	0	0	0	1	1	1	0	0	0	1	2		0	0	0	0	0	0	0	0	0	0	0	0	0	0	0	cpaA, tadV; prepilin peptidase CpaA [EC:3.4.23.43]
K03605	1	1	1	1	1	1		0	0	0	0	1	1	0	0	0	0	0		1	0	1	0	0	0	0	0	0	0	0	0		2	2	2	0	0	0	0	0	0	0	0	0	0	0	0	hyaD, hybD; hydrogenase maturation protease [EC:3.4.23.-]
K08315	0	0	0	0	0	0		0	0	0	0	0	0	0	1	0	1	0		0	0	0	0	1	1	1	1	1	0	1	1		0	0	0	0	0	0	0	0	0	0	0	0	0	0	0	hycI; hydrogenase 3 maturation protease [EC:3.4.23.51]
K01372	0	0	0	0	0	0		1	0	0	1	1	2	2	0	1	2	1		3	0	1	0	1	1	1	1	1	2	1	1		0	0	0	0	0	1	0	2	1	1	1	1	1	1	1	BLMH, pepC; bleomycin hydrolase [EC:3.4.22.40]
K22684	1	3	2	1	2	2		0	0	0	0	0	0	0	0	0	0	1		0	0	0	1	0	0	0	0	1	0	1	1		0	0	0	0	0	0	0	0	0	0	0	0	0	0	0	MCA1; metacaspase-1 [EC:3.4.22.-]
K07010	0	1	1	2	1	1		0	1	1	0	0	0	0	0	0	0	0		0	0	0	1	1	0	0	1	0	0	1	1		0	1	1	0	0	0	0	0	0	1	0	1	1	1	0	K07010; putative glutamine amidotransferase
K20742	0	0	0	0	0	0		0	0	0	1	0	0	0	0	0	0	0		1	1	2	0	0	1	1	0	0	0	1	1		0	0	0	0	0	0	0	0	0	0	0	0	0	0	0	ykfC; gamma-D-glutamyl-L-lysine dipeptidyl-peptidase [EC:3.4.14.13]
K05520	0	1	1	1	1	1		1	0	0	2	1	1	0	0	0	0	0		0	0	1	1	1	1	2	2	1	0	1	1		1	1	1	0	0	0	0	0	0	0	0	0	0	0	0	pfpI; protease I [EC:3.5.1.124]
K08659	0	1	1	1	0	0		0	0	0	2	2	2	1	2	2	2	1		3	1	1	1	1	4	0	1	0	0	2	2		0	0	0	0	0	0	0	0	0	0	0	0	0	0	0	pepDA, pepDB; dipeptidase [EC:3.4.-.-]
K14358	0	0	0	0	0	0		0	0	0	1	1	1	0	0	0	0	0		0	0	0	0	0	0	0	1	1	0	0	0		0	0	0	0	0	0	0	0	0	0	0	0	0	0	0	SCRN; secernin
K21470	0	1	0	0	0	0		0	0	0	0	0	0	0	0	0	0	0		0	0	2	0	1	0	0	0	0	0	1	1		0	0	0	0	0	0	0	0	0	0	0	0	0	0	0	ycbB; L,D-transpeptidase YcbB
K01284	0	0	0	0	0	0		0	0	0	0	0	0	0	0	0	0	0		0	0	0	1	1	1	1	0	1	0	1	1		0	0	0	0	2	1	1	0	1	1	0	1	1	0	0	dcp; peptidyl-dipeptidase Dcp [EC:3.4.15.5]
K08602	1	1	2	1	1	1		0	0	0	1	1	1	0	0	0	0	0		0	0	1	2	1	1	2	1	1	0	1	1		1	1	1	1	0	1	1	0	1	1	1	1	1	1	0	pepF, pepB; oligoendopeptidase F [EC:3.4.24.-]
K09607	0	1	0	0	0	0		1	1	1	0	0	0	0	0	0	0	0		1	0	1	0	0	0	0	0	0	1	0	0		1	1	1	0	0	1	0	0	1	0	1	1	1	0	1	ina; immune inhibitor A [EC:3.4.24.-]
K07386	0	0	0	0	0	0		0	0	0	0	0	0	0	0	0	0	0		0	0	0	0	0	1	0	0	0	0	0	0		0	0	0	0	0	0	0	0	0	0	0	0	0	0	0	pepO; putative endopeptidase [EC:3.4.24.-]
K05996	2	2	1	3	3	3		0	0	0	1	1	1	0	0	0	0	0		0	0	1	1	0	0	0	2	0	0	0	0		0	0	0	0	0	0	0	0	1	1	0	0	0	0	0	cpt; carboxypeptidase T [EC:3.4.17.18]
K01308	1	0	1	1	1	1		0	1	1	1	0	0	0	0	0	0	0		1	0	2	0	0	0	0	1	0	0	0	0		1	1	1	1	1	1	0	1	1	1	0	1	1	1	1	yqgT; g-D-glutamyl-meso-diaminopimelate peptidase [EC:3.4.19.11]
K17733	0	0	0	0	0	0		0	0	0	0	0	0	0	0	0	0	0		0	0	0	0	0	0	0	1	0	0	0	0		0	0	0	0	0	0	0	0	0	0	0	0	0	0	0	cwlK; peptidoglycan LD-endopeptidase CwlK [EC:3.4.-.-]
K06972	1	1	1	1	1	2		0	0	0	0	0	0	0	0	0	0	0		0	0	0	1	1	1	1	0	1	0	0	0		0	0	0	0	0	0	0	0	0	0	0	0	0	0	0	PITRM1, PreP, CYM1; presequence protease [EC:3.4.24.-]
K07263	7	5	6	6	6	7		1	8	6	4	3	3	0	2	3	3	3		3	1	1	1	4	3	7	0	0	5	7	4		5	5	5	2	2	5	4	2	3	5	7	5	6	5	5	pqqL; zinc protease [EC:3.4.24.-]
K01273	3	3	6	5	5	5		2	4	5	0	0	0	0	0	0	0	0		2	1	3	0	3	2	2	1	1	0	2	2		4	4	4	1	1	4	3	1	3	5	2	3	2	5	4	DPEP; membrane dipeptidase [EC:3.4.13.19]
K01295	0	0	0	0	0	0		0	1	0	0	0	0	0	0	0	0	0		0	0	0	0	0	0	0	0	0	0	0	0		0	0	0	0	0	1	0	0	0	0	1	1	0	0	0	cpg; glutamate carboxypeptidase [EC:3.4.17.11]
K01258	0	1	0	0	0	0		2	0	0	1	1	1	1	0	1	1	0		1	1	2	1	2	1	2	2	0	0	2	1		0	0	0	0	0	0	0	0	0	0	0	0	0	0	0	pepT; tripeptide aminopeptidase [EC:3.4.11.4]
K12941	0	0	0	0	0	0		1	1	1	0	0	0	0	0	0	0	0		0	0	0	0	0	0	0	0	0	0	0	0		0	0	0	0	0	0	1	1	1	1	1	1	1	2	0	abgB; aminobenzoyl-glutamate utilization protein B
K01436	0	0	0	0	0	0		0	2	2	1	1	1	0	0	1	1	1		0	1	0	0	0	0	0	0	0	0	0	0		0	0	0	0	0	0	1	0	1	0	1	1	0	0	0	K01436; amidohydrolase [EC:3.5.1.-]
K21472	1	1	0	1	1	1		1	1	1	0	0	0	0	0	0	0	0		0	0	1	0	0	0	0	0	0	0	0	0		0	0	0	0	0	0	0	0	0	0	0	0	0	0	0	lytH; peptidoglycan LD-endopeptidase LytH [EC:3.4.-.-]
K19304	1	1	0	1	1	1		1	2	1	0	0	0	0	0	0	0	0		0	0	1	0	1	1	1	0	0	1	1	1		0	0	0	0	0	0	0	0	0	0	0	0	0	0	0	mepM; murein DD-endopeptidase [EC:3.4.24.-]
K08259	0	0	0	0	0	0		0	0	0	0	0	0	0	0	0	0	0		0	0	0	0	0	0	0	0	0	0	0	0		0	0	0	0	0	0	0	0	0	0	0	0	0	0	0	lytM; lysostaphin [EC:3.4.24.75]
K01265	1	1	1	1	1	1		0	1	1	1	1	1	0	2	1	1	1		1	1	1	1	1	1	1	1	1	1	1	1		1	1	1	0	1	1	1	1	1	1	1	1	1	1	1	map; methionyl aminopeptidase [EC:3.4.11.18]
K01271	0	0	0	0	0	0		1	0	0	0	0	0	0	0	0	0	0		0	0	0	0	0	0	0	0	0	0	0	0		0	0	0	0	0	0	0	0	0	0	0	0	0	0	0	pepQ; Xaa-Pro dipeptidase [EC:3.4.13.9]
K01262	1	1	1	1	1	1		1	0	0	1	1	0	0	0	0	0	0		1	0	0	0	1	0	1	0	0	0	1	0		1	1	1	0	1	2	2	3	1	2	2	3	3	2	2	pepP; Xaa-Pro aminopeptidase [EC:3.4.11.9]
K05994	0	1	1	0	1	1		0	0	0	0	0	0	0	0	0	0	0		0	0	0	1	0	0	0	0	0	0	0	0		0	0	0	0	0	0	0	0	0	0	0	0	0	0	0	E3.4.11.10; bacterial leucyl aminopeptidase [EC:3.4.11.10]
K19701	0	0	0	0	0	0		0	0	0	0	0	0	0	0	0	0	0		0	0	0	0	0	0	0	0	0	0	0	0		0	0	0	0	0	0	0	0	0	0	0	0	0	0	0	ywaD; aminopeptidase YwaD [EC:3.4.11.6 3.4.11.10]
K01301	1	0	1	1	1	1		0	1	1	0	0	0	0	0	0	0	0		0	0	0	0	0	0	0	0	0	0	0	0		0	0	0	1	0	0	1	0	0	0	1	1	0	0	0	NAALAD; N-acetylated-alpha-linked acidic dipeptidase [EC:3.4.17.21]
K01302	1	1	1	1	1	1		1	2	2	0	0	0	0	0	0	0	0		0	0	0	0	0	0	1	0	0	0	0	0		2	2	2	0	0	1	0	0	0	1	1	1	1	1	0	CPQ; carboxypeptidase Q [EC:3.4.17.-]
K19689	2	3	3	3	3	3		1	2	2	2	1	1	1	1	2	1	0		1	0	2	0	2	2	1	2	0	2	2	2		0	0	0	3	2	2	0	1	2	1	2	3	2	1	1	ampS, pepS, ampT; aminopeptidase [EC:3.4.11.-]
K01305	0	0	0	0	0	0		0	0	0	0	0	0	0	0	0	0	0		1	0	0	0	0	0	0	0	0	0	0	0		0	0	0	0	0	0	0	0	0	1	0	0	0	0	0	iadA; beta-aspartyl-dipeptidase (metallo-type) [EC:3.4.19.-]
K03798	1	2	2	1	2	2		1	1	1	2	2	2	1	1	0	1	0		2	0	1	0	0	2	2	1	1	1	2	2		2	2	2	0	0	1	1	1	1	1	1	1	1	1	1	ftsH, hflB; cell division protease FtsH [EC:3.4.24.-]
K03799	2	1	1	1	1	1		0	0	0	0	0	0	0	0	0	0	0		0	0	0	0	0	0	0	1	1	0	0	0		1	1	1	1	0	1	1	0	1	1	1	1	1	1	1	htpX; heat shock protein HtpX [EC:3.4.24.-]
K23010	2	2	2	1	2	2		0	0	0	1	0	0	1	0	1	1	1		0	0	1	1	0	0	1	1	0	0	1	1		0	0	0	0	0	0	0	0	0	0	0	0	0	0	0	OMA1; metalloendopeptidase OMA1, mitochondrial [EC:3.4.24.-]
K07387	0	0	0	0	0	0		0	0	0	0	0	0	0	0	0	0	0		0	0	0	0	0	0	0	0	1	0	1	1		0	0	0	0	0	0	0	0	0	0	0	0	0	0	0	K07387; metalloprotease [EC:3.4.24.-]
K01423	0	0	2	1	2	2		0	1	1	1	1	1	1	0	1	1	1		0	0	0	0	1	1	1	0	1	0	1	1		0	0	0	1	1	1	0	0	1	1	1	1	0	0	1	bepA; beta-barrel assembly-enhancing protease [EC:3.4.-.-]
K01277	0	0	0	0	0	0		0	1	1	0	0	0	0	0	0	0	0		0	0	0	0	0	0	0	0	0	0	0	0		0	0	0	2	1	0	0	0	0	0	0	0	0	0	0	DPP3; dipeptidyl-peptidase III [EC:3.4.14.4]
K06402	2	3	4	4	3	3		0	0	0	0	0	0	0	0	0	0	0		0	0	1	1	0	1	0	1	0	0	0	0		2	2	2	0	0	0	0	0	0	0	0	0	0	0	0	spoIVFB; stage IV sporulation protein FB [EC:3.4.24.-]
K16922	0	0	0	0	0	0		0	0	0	0	0	0	0	0	0	0	0		0	0	0	0	0	0	1	0	0	1	0	0		0	0	0	0	0	0	0	0	0	0	0	0	0	0	0	yydH; putative peptide zinc metalloprotease protein
K06974	1	1	1	1	1	0		1	0	0	2	1	1	0	0	0	1	0		0	1	1	0	1	0	1	0	0	1	0	0		0	0	0	0	0	0	0	0	0	0	0	0	0	0	0	amzA, AMZ2, AMZ1; archaemetzincin [EC:3.4.-.-]
K16203	1	1	1	1	1	1		2	2	2	0	0	0	1	1	1	0	0		1	1	1	0	1	1	0	0	0	0	2	2		0	0	0	0	0	2	1	1	1	1	1	2	2	2	2	dppA1; D-amino peptidase [EC:3.4.11.-]
K09933	0	0	0	0	0	0		0	0	0	0	1	1	0	0	0	0	0		0	0	0	0	0	1	0	0	0	0	0	0		0	0	0	0	0	0	0	0	0	0	0	0	0	0	0	mtfA; MtfA peptidase
K01266	4	3	4	8	5	7		2	3	3	1	1	1	0	0	0	0	0		1	0	2	1	1	0	2	1	1	1	1	1		2	2	2	1	2	2	0	1	2	2	2	2	2	2	2	dmpA, dap; D-aminopeptidase [EC:3.4.11.19]
K08651	0	0	0	0	0	0		1	0	0	0	0	0	0	0	0	0	0		0	0	0	0	0	0	0	0	0	0	0	0		0	0	0	0	0	0	0	0	0	0	0	1	0	1	0	E3.4.21.66; thermitase [EC:3.4.21.66]
K01280	0	0	0	0	0	0		0	0	0	1	1	1	0	0	1	1	1		1	1	0	0	0	0	1	0	0	0	0	0		0	0	0	0	0	0	0	0	0	0	0	0	0	0	0	TPP2; tripeptidyl-peptidase II [EC:3.4.14.10]
K17734	0	2	0	0	1	0		0	0	0	1	0	0	0	0	0	1	1		0	0	0	0	0	0	0	0	0	0	0	0		0	0	0	0	0	0	0	0	0	0	0	0	0	0	0	aprX; serine protease AprX [EC:3.4.21.-]
K01303	1	2	2	2	3	3		4	3	5	3	3	2	1	0	1	0	1		1	1	3	1	1	1	2	0	1	1	1	1		3	3	3	1	2	6	4	0	4	7	3	5	2	2	2	APEH; acylaminoacyl-peptidase [EC:3.4.19.1]
K01076	0	0	0	0	0	0		0	0	0	0	0	0	0	0	0	0	0		0	0	0	0	0	0	1	0	0	0	0	0		0	0	0	0	0	0	0	0	0	0	0	0	0	0	0	ABHD17; abhydrolase domain-containing protein 17 [EC:3.1.2.22]
K17382	0	1	1	1	1	1		1	1	1	0	0	0	0	0	0	0	0		0	0	0	0	0	0	0	0	0	0	0	0		4	4	4	0	0	1	1	1	2	1	1	1	0	0	0	LACTB; serine beta-lactamase-like protein LACTB, mitochondrial
K04770	1	1	1	1	1	0		0	0	0	0	0	0	0	0	0	0	0		0	1	1	0	0	1	1	0	0	1	0	0		1	1	1	0	0	0	0	0	0	0	0	0	0	0	0	lonH; Lon-like ATP-dependent protease [EC:3.4.21.-]
K01356	1	1	2	0	1	1		1	0	0	1	1	1	0	0	0	0	0		0	0	1	1	2	2	2	2	2	1	2	2		1	1	1	1	0	1	1	0	1	1	1	1	0	0	1	lexA; repressor LexA [EC:3.4.21.88]
K03503	0	0	0	0	0	0		0	0	0	0	0	0	0	0	0	0	0		0	0	0	0	0	0	0	0	0	0	0	0		0	0	0	0	0	0	0	0	0	0	0	0	0	0	0	umuD; DNA polymerase V [EC:3.4.21.-]
K13703	0	0	0	0	0	0		0	0	1	0	0	0	0	0	0	0	0		0	0	0	0	0	0	0	0	0	0	0	0		0	0	0	0	0	0	0	0	0	0	0	0	0	0	0	ABHD11; abhydrolase domain-containing protein 11
K03797	3	3	4	4	4	4		3	3	3	3	4	5	1	3	3	3	3		3	3	2	4	3	2	3	4	2	2	3	3		3	3	3	1	3	3	3	2	4	5	3	4	4	4	3	E3.4.21.102, prc, ctpA; carboxyl-terminal processing protease [EC:3.4.21.102]
K08676	3	2	2	2	2	2		1	5	1	4	3	4	1	1	1	1	1		1	6	1	1	0	2	1	2	0	0	2	2		1	1	1	0	0	0	2	0	3	2	4	1	0	0	0	tri; tricorn protease [EC:3.4.21.-]
K04773	2	3	3	2	3	3		1	2	1	2	2	2	0	0	1	1	1		1	1	2	2	1	1	1	1	1	1	1	1		1	1	1	2	1	1	1	0	2	2	1	1	1	2	0	sppA; protease IV [EC:3.4.21.-]
K04774	1	0	0	0	0	0		0	0	0	0	0	0	0	0	0	0	0		0	0	0	0	0	0	0	0	0	0	0	0		0	0	0	0	0	0	0	0	0	0	0	0	0	0	0	sohB; serine protease SohB [EC:3.4.21.-]
K05995	0	0	0	0	0	0		0	0	0	0	0	0	0	0	0	0	0		0	0	0	0	0	0	0	0	0	0	0	0		0	0	0	0	0	0	0	0	0	0	0	0	0	0	0	pepE; dipeptidase E [EC:3.4.13.21]
K13282	0	2	0	0	0	0		0	2	2	0	0	0	0	0	0	0	0		2	1	1	0	2	0	2	1	0	0	1	0		0	0	0	0	0	0	0	0	0	1	1	1	1	0	0	cphB; cyanophycinase [EC:3.4.15.6]
K09650	0	0	0	0	0	0		0	0	0	0	0	0	0	0	0	0	0		0	0	1	0	1	0	1	0	0	0	0	1		1	1	1	0	1	0	0	0	0	0	0	0	0	0	0	PARL, PSARL, PCP1; rhomboid-like protein [EC:3.4.21.105]
K19225	1	1	0	1	1	1		0	0	0	0	0	0	0	0	0	0	0		1	1	1	2	1	1	1	2	1	0	1	1		0	0	0	0	1	1	1	1	1	0	1	1	0	0	1	gluP; rhomboid protease GluP [EC:3.4.21.105]
K01297	1	1	1	1	1	2		1	1	1	2	2	2	0	1	1	0	1		1	0	2	1	2	2	2	1	1	1	2	2		1	1	1	1	0	2	1	1	1	1	1	1	1	1	1	ldcA; muramoyltetrapeptide carboxypeptidase [EC:3.4.17.13]
K01419	1	1	1	1	1	1		1	1	1	1	1	1	1	1	1	1	1		1	0	1	1	1	1	1	1	1	1	1	1		1	1	1	0	1	1	2	0	1	2	1	1	1	0	1	hslV, clpQ; ATP-dependent HslUV protease, peptidase subunit HslV [EC:3.4.25.2]
K03592	0	0	0	0	0	0		0	0	0	0	0	0	0	1	1	0	1		0	2	0	2	2	1	2	2	1	0	1	1		0	0	0	0	0	0	0	0	0	0	0	0	0	0	0	pmbA; PmbA protein
K03568	1	0	0	1	1	1		0	1	1	0	0	0	0	0	1	0	1		0	3	2	2	2	1	2	2	1	0	1	1		0	0	0	0	1	0	0	2	0	0	0	0	0	0	0	tldD; TldD protein
K06894	1	1	1	1	1	1		0	1	1	1	0	0	0	0	0	0	0		0	2	1	2	1	1	1	0	2	1	1	1		0	0	0	0	0	0	0	1	0	0	0	0	1	0	0	yfhM; alpha-2-macroglobulin
K06910	1	1	1	1	1	1		0	0	0	1	1	1	0	0	0	0	0		0	0	2	0	0	2	0	0	1	1	0	0		2	2	2	0	1	0	0	0	0	0	0	0	0	0	0	PEBP1, TFS1; phosphatidylethanolamine-binding protein
K04087	1	1	0	1	1	0		1	1	1	1	1	1	0	1	2	1	1		1	0	1	1	0	1	1	1	1	1	0	0		1	1	1	1	1	1	0	1	1	1	1	1	0	0	0	hflC; modulator of FtsH protease HflC
K04088	1	1	1	1	1	1		1	1	1	1	1	1	0	0	1	1	1		1	0	1	1	0	1	1	1	1	1	0	0		1	1	1	1	1	1	0	1	1	1	1	1	0	0	0	hflK; modulator of FtsH protease HflK
K23424	0	0	0	0	0	0		0	1	0	1	0	0	0	0	0	1	0		0	0	0	0	4	1	1	0	0	0	0	0		1	1	1	0	0	0	1	1	1	1	0	0	2	1	1	TMTC; protein O-mannosyl-transferase [EC:2.4.1.-]
K20151	0	0	0	0	0	0		0	0	0	0	0	0	0	0	0	0	0		0	0	0	0	0	0	1	0	0	0	0	0		0	0	0	0	0	0	0	0	0	0	0	0	0	0	0	fucT; alpha(1,3/1,4) fucosyltransferase [EC:2.4.1.65 2.4.1.152]
K12984	1	2	2	2	2	2		0	1	1	2	2	2	0	0	1	1	0		0	0	0	1	2	2	2	2	1	2	2	2		0	0	0	0	0	0	0	0	0	0	0	0	0	0	0	waaE, kdtX; (heptosyl)LPS beta-1,4-glucosyltransferase [EC:2.4.1.-]
K12993	0	0	0	0	0	0		0	0	0	0	0	0	0	0	0	0	0		0	0	0	0	0	0	0	0	0	0	0	0		0	0	0	0	0	0	0	0	0	0	0	0	0	0	0	wbdA, wbpX, mtfA; alpha-1,2-mannosyltransferase/rhamnosyltransferase [EC:2.4.1.-]
K12994	0	1	0	0	0	0		0	0	0	0	0	0	0	1	0	1	0		0	0	0	1	0	1	1	1	1	0	0	0		1	1	1	0	0	0	0	0	0	0	0	0	0	0	1	wbdB, wbpY, mtfB; mannosyl-N-acetyl-alpha-D-glucosaminyl-diphospho-ditrans,octacis-undecaprenol 3-alpha-mannosyltransferase / alpha-1,3-rhamnosyltransferase [EC:2.4.1.349 2.4.1.-]
K12995	0	0	0	0	0	0		0	0	0	0	0	0	0	0	0	0	0		0	0	0	0	0	0	0	0	0	0	0	0		1	1	1	0	0	0	0	0	0	0	0	0	0	0	0	wbdC, wbpZ, mtfC; N-acetyl-alpha-D-glucosaminyl-diphospho-ditrans,octacis-undecaprenol 3-alpha-mannosyltransferase / rhamnosyltransferase [EC:2.4.1.348 2.4.1.-]
K13688	1	1	0	1	1	1		1	0	0	0	1	1	0	0	0	0	0		0	0	0	0	1	0	0	0	0	1	0	0		0	0	0	0	0	0	0	0	0	0	0	0	0	0	0	chvB, cgs, ndvB; cyclic beta-1,2-glucan synthetase [EC:2.4.1.-]
K13658	0	0	0	0	0	0		0	0	0	0	0	0	0	0	0	0	0		0	0	0	0	0	0	0	0	0	0	0	0		0	0	0	0	0	0	0	0	0	0	0	0	0	0	0	gumI; beta-1,4-mannosyltransferase [EC:2.4.1.251]
K22908	0	0	0	0	0	0		1	2	2	0	0	0	0	0	0	0	0		1	1	0	0	0	0	0	0	0	0	0	0		0	0	0	2	2	0	0	0	0	0	0	0	0	0	0	mggS; mannosylglucosylglycerate synthase [EC:2.4.1.-]
K13693	0	0	0	0	0	0		1	0	0	0	0	0	0	0	0	0	0		0	0	0	0	0	0	0	0	0	0	0	0		1	1	1	0	0	0	0	0	0	0	0	0	0	0	0	gpgS; glucosyl-3-phosphoglycerate synthase [EC:2.4.1.266]
K16703	0	3	1	1	1	0		0	0	0	1	0	0	0	0	0	0	0		1	0	0	1	2	2	2	1	1	2	1	1		1	1	1	0	0	0	0	0	0	0	1	0	0	0	0	wcaL, amsK; colanic acid/amylovoran biosynthesis glycosyltransferase [EC:2.4.-.-]
K12978	0	0	0	0	0	0		0	0	0	0	0	0	0	0	0	0	0		0	0	0	0	0	0	0	0	0	0	0	0		0	0	0	0	0	0	0	0	0	0	0	0	0	0	0	lpxF; lipid A 4'-phosphatase [EC:3.1.3.-]
K20444	3	5	4	4	4	3		3	2	1	3	2	2	1	2	2	1	2		0	0	0	2	0	1	1	2	1	0	2	2		3	3	3	0	0	2	2	5	3	2	2	3	2	3	2	rfbC; O-antigen biosynthesis protein [EC:2.4.1.-]
K20534	0	1	1	1	1	1		0	1	1	0	0	0	0	0	0	0	0		0	0	0	0	0	0	2	0	0	0	0	0		0	0	0	0	0	0	0	0	0	0	0	0	0	0	0	gtrB, csbB; polyisoprenyl-phosphate glycosyltransferase [EC:2.4.-.-]
K19714	0	0	0	0	0	0		0	0	0	0	0	0	0	0	0	0	0		0	0	0	1	0	0	0	0	0	0	0	0		0	0	0	0	0	0	0	0	0	0	0	0	0	0	0	kdnB; 3-deoxy-alpha-D-manno-octulosonate 8-oxidase [EC:1.1.3.48]
K19715	0	0	0	0	0	0		0	0	0	0	0	0	0	0	0	0	0		0	0	0	1	0	0	1	1	1	0	0	0		0	0	0	0	0	0	0	0	0	0	0	0	0	0	0	kdnA; 8-amino-3,8-dideoxy-alpha-D-manno-octulosonate transaminase [EC:2.6.1.109]
K13013	0	0	1	1	1	1		0	0	0	0	0	0	0	0	0	0	0		0	0	0	0	0	0	0	0	0	0	0	0		0	0	0	0	0	0	0	0	0	0	0	0	0	0	0	wbqV; O-antigen biosynthesis protein WbqV
K03980	1	1	1	1	1	1		0	0	0	1	1	1	0	0	0	0	0		0	1	1	0	2	0	0	0	0	0	1	1		0	0	0	0	0	0	0	0	0	0	0	0	0	1	0	murJ, mviN; putative peptidoglycan lipid II flippase
K08309	0	0	0	0	0	0		2	1	1	1	1	1	1	1	0	1	1		0	0	0	0	0	0	0	0	0	1	0	0		0	0	0	1	1	3	2	2	3	4	2	3	2	2	2	slt; soluble lytic murein transglycosylase [EC:4.2.2.-]
K08305	0	0	0	0	0	0		0	0	0	0	0	0	0	0	0	0	0		0	0	0	0	1	0	0	0	0	0	0	0		0	0	0	0	0	0	0	0	0	0	0	0	0	1	0	mltB; membrane-bound lytic murein transglycosylase B [EC:4.2.2.-]
K08307	3	2	2	2	2	2		1	1	1	1	1	1	1	1	1	1	1		1	1	2	2	2	1	1	1	1	0	1	1		2	2	2	2	0	3	1	1	1	2	0	2	2	2	2	mltD, dniR; membrane-bound lytic murein transglycosylase D [EC:4.2.2.-]
K18691	0	0	0	0	0	0		1	1	1	0	1	1	0	0	0	0	0		0	0	0	0	0	0	1	0	0	0	0	0		0	0	0	0	0	0	0	0	0	0	0	0	0	0	0	mltF; membrane-bound lytic murein transglycosylase F [EC:4.2.2.-]
K00666	0	0	0	0	0	0		0	0	0	2	2	2	1	0	0	1	1		0	0	0	0	0	0	1	0	0	0	2	1		1	1	1	0	0	1	1	1	2	0	0	1	0	1	0	K00666; fatty-acyl-CoA synthase [EC:6.2.1.-]
K16167	0	1	1	1	1	0		0	0	0	0	0	0	0	0	0	0	0		0	0	0	0	0	0	0	0	0	0	0	0		0	0	0	0	1	0	0	0	0	0	0	0	0	0	0	bpsA, srsA, pks11, pks10; alkylresorcinol/alkylpyrone synthase
K16168	0	1	1	1	1	0		0	0	0	0	0	0	0	0	0	0	0		0	0	0	0	0	0	0	0	0	0	0	0		0	0	0	0	1	0	0	0	0	0	0	0	0	0	0	bpsB, srsB; methyltransferase
K14261	1	1	1	1	1	1		0	0	0	0	0	0	1	1	1	1	1		0	0	0	0	0	0	0	0	0	0	0	0		0	0	0	0	0	0	0	0	0	0	0	0	0	0	0	alaC; alanine-synthesizing transaminase [EC:2.6.1.-]
K03918	0	0	0	0	0	0		1	1	1	1	1	1	1	1	1	1	1		0	1	0	0	0	0	0	0	0	0	0	0		2	2	2	0	1	1	1	1	1	1	1	1	1	1	1	lat; L-lysine 6-transaminase [EC:2.6.1.36]
K02805	0	1	0	1	0	0		0	0	0	0	0	0	0	0	0	0	0		0	0	0	0	0	0	0	1	0	0	0	0		0	0	0	0	0	0	0	1	0	0	0	0	0	0	0	wecE, rffA; dTDP-4-amino-4,6-dideoxygalactose transaminase [EC:2.6.1.59]
K23139	1	0	0	0	0	0		0	0	0	0	0	0	0	0	0	0	0		0	0	0	0	0	0	0	0	0	0	0	0		0	0	0	0	0	0	0	0	0	0	0	0	0	0	0	CYP110; cytochrome P450 family 110 [EC:1.14.-.-]
K02116	0	0	0	0	0	0		0	0	0	0	0	0	0	0	0	0	0		0	0	0	0	0	1	0	1	0	0	0	0		0	0	0	0	0	0	0	0	0	0	0	1	1	0	0	atpI; ATP synthase protein I
K13992	0	0	0	0	0	0		0	1	1	0	0	0	0	0	0	0	0		0	0	0	0	0	0	0	0	0	0	0	0		1	1	1	0	0	1	0	1	1	0	1	1	1	1	1	pufC; photosynthetic reaction center cytochrome c subunit
K03490	0	1	1	1	0	0		0	0	0	0	0	0	0	0	0	0	0		0	0	0	0	0	0	0	0	0	0	0	0		0	0	0	0	0	0	0	0	0	0	0	0	0	0	0	chbR, celD; AraC family transcriptional regulator, dual regulator of chb operon
K18991	0	0	1	1	1	1		0	0	0	0	0	0	0	0	0	0	0		0	0	0	0	0	0	0	0	0	0	0	0		0	0	0	0	0	1	0	0	0	1	0	0	0	0	0	mtrA; AraC family transcriptional regulator, activator of mtrCDE
K23237	0	0	0	0	0	0		0	0	0	0	0	0	0	0	0	0	0		0	0	0	1	0	0	0	0	0	0	0	0		0	0	0	0	0	0	0	0	0	0	0	0	0	0	0	melR; AraC family transcriptional regulator, melibiose operon regulatory protein
K13652	0	0	0	0	0	0		0	1	1	0	0	0	0	0	0	0	0		0	0	0	1	0	0	1	2	0	0	0	0		0	0	0	0	0	0	0	0	0	0	0	0	0	0	0	K13652; AraC family transcriptional regulator
K13653	0	0	0	0	0	0		0	0	0	0	0	0	0	0	0	0	0		0	0	0	0	0	1	0	0	0	0	0	0		0	0	0	0	0	0	0	0	0	0	0	0	0	0	0	K13653; AraC family transcriptional regulator
K07506	0	0	0	0	0	0		0	0	0	0	0	0	0	0	0	0	0		0	0	0	0	0	0	0	0	0	0	0	0		1	1	1	0	0	0	0	0	0	0	0	0	0	0	0	K07506; AraC family transcriptional regulator
K10778	1	1	1	1	1	1		0	1	1	0	0	0	0	0	0	0	0		0	1	0	0	1	0	0	0	0	0	0	0		1	1	1	1	0	1	1	1	0	1	1	1	1	1	0	ada; AraC family transcriptional regulator, regulatory protein of adaptative response / methylated-DNA-[protein]-cysteine methyltransferase [EC:2.1.1.63]
K03576	0	0	0	0	0	0		0	0	0	0	0	0	0	0	0	0	0		0	0	0	0	0	0	0	0	0	0	0	0		1	1	1	0	0	0	0	1	0	0	1	0	0	0	0	metR; LysR family transcriptional regulator, regulator for metE and metH
K02081	0	1	1	0	1	1		0	0	0	0	0	0	0	0	1	0	0		0	0	0	0	0	0	0	0	0	0	0	0		0	0	0	0	0	0	0	0	0	0	0	0	0	0	0	agaR; DeoR family transcriptional regulator, aga operon transcriptional repressor
K03436	0	0	0	0	0	0		0	0	0	0	0	0	0	1	1	0	1		0	0	0	0	0	0	0	0	0	0	0	0		0	0	0	0	0	0	0	0	0	0	0	0	0	0	0	fruR2, fruR; DeoR family transcriptional regulator, fructose operon transcriptional repressor
K02529	4	6	6	6	6	4		1	0	0	4	3	4	1	1	1	1	1		1	1	5	3	6	4	6	2	3	3	5	6		0	0	0	0	1	0	0	0	1	1	0	0	0	0	0	lacI, galR; LacI family transcriptional regulator
K02103	0	0	0	0	0	0		0	0	0	0	0	0	0	1	1	1	0		1	0	2	0	1	0	0	0	0	0	3	2		0	0	0	0	1	0	0	0	0	1	0	0	0	1	0	araR; GntR family transcriptional regulator, arabinose operon transcriptional repressor
K03710	0	0	0	0	0	0		0	0	0	0	0	0	0	0	0	0	0		0	0	0	0	1	0	0	0	0	0	1	1		0	0	0	0	0	0	0	0	0	0	0	0	0	0	0	K03710; GntR family transcriptional regulator
K05799	0	0	0	0	0	0		0	0	0	0	0	0	0	0	0	0	0		0	0	3	0	1	2	2	0	0	0	0	0		0	0	0	0	0	0	0	0	0	0	0	0	0	0	0	pdhR; GntR family transcriptional regulator, transcriptional repressor for pyruvate dehydrogenase complex
K00375	0	1	0	0	0	0		0	0	0	0	0	0	0	0	0	0	0		0	0	0	0	0	0	0	0	0	0	0	0		0	0	0	0	0	0	0	0	0	0	0	0	0	0	0	K00375; GntR family transcriptional regulator / MocR family aminotransferase
K07979	0	0	0	0	0	0		0	0	0	1	0	0	0	0	0	0	0		0	0	0	0	1	0	1	1	0	0	0	0		0	0	0	0	0	0	1	0	1	1	0	0	1	0	0	ytrA; GntR family transcriptional regulator
K22293	0	0	0	0	0	0		0	0	0	0	0	0	0	0	0	0	0		0	0	0	0	0	0	0	0	0	0	0	0		0	0	0	0	1	0	0	0	0	0	0	0	0	0	0	rspR; GntR family transcriptional regulator, rspAB operon transcriptional repressor
K13770	1	0	1	1	1	1		0	0	0	3	1	1	0	1	1	0	2		1	1	2	1	1	1	2	1	1	0	2	1		2	2	2	1	0	1	1	0	1	1	0	1	1	1	2	ysiA, fadR; TetR/AcrR family transcriptional regulator, fatty acid metabolism regulator protein
K16137	0	0	0	0	1	0		0	0	0	0	0	0	0	0	0	0	0		0	0	0	0	0	0	0	0	0	0	0	0		0	0	0	0	0	0	0	0	0	0	0	1	0	0	0	nemR; TetR/AcrR family transcriptional regulator, transcriptional repressor for nem operon
K16138	0	0	0	0	0	0		0	0	0	0	0	0	0	0	0	0	0		0	0	0	0	0	0	0	0	0	0	0	0		0	0	0	0	0	0	0	0	0	0	0	0	0	0	0	uidR; TetR/AcrR family transcriptional regulator, repressor for uid operon
K03719	1	2	1	1	1	1		0	1	1	0	0	0	0	0	0	0	0		0	0	0	0	0	1	1	0	0	1	0	0		0	1	1	0	0	2	2	0	2	2	1	1	2	1	2	lrp; Lrp/AsnC family transcriptional regulator, leucine-responsive regulatory protein
K03556	4	0	2	4	0	0		0	1	0	0	0	0	0	0	0	0	0		0	0	1	0	0	0	1	0	1	0	2	0		0	0	0	0	0	0	0	0	0	0	0	0	0	0	0	malT; LuxR family transcriptional regulator, maltose regulon positive regulatory protein
K16247	3	1	1	3	1	0		0	0	0	0	0	0	0	0	0	0	0		0	0	0	0	0	0	0	0	0	0	0	0		0	0	0	0	0	0	0	0	0	0	0	0	0	0	0	gutR; LuxR family transcriptional regulator, glucitol operon activator
K03712	0	0	0	0	0	0		0	0	0	0	0	0	0	0	0	0	0		0	0	0	0	0	0	0	0	0	0	0	0		0	0	0	0	1	0	0	0	0	0	0	0	0	0	0	marR; MarR family transcriptional regulator, multiple antibiotic resistance protein MarR
K15973	1	1	1	1	1	1		0	0	0	0	0	0	0	0	0	0	0		0	0	0	0	0	0	0	0	0	0	0	0		0	0	0	0	0	0	0	0	0	0	0	0	0	0	0	mhqR; MarR family transcriptional regulator, 2-MHQ and catechol-resistance regulon repressor
K08365	0	0	0	0	0	1		0	1	0	0	1	1	0	0	0	0	0		0	0	0	0	0	0	0	0	0	0	0	0		1	1	1	0	1	0	0	0	0	1	0	0	0	0	0	merR; MerR family transcriptional regulator, mercuric resistance operon regulatory protein
K19591	0	0	0	0	0	0		0	1	0	0	0	0	0	0	0	0	0		0	0	0	0	0	0	0	0	0	0	0	0		1	1	1	0	0	0	0	0	0	0	0	0	0	0	0	cueR; MerR family transcriptional regulator, copper efflux regulator
K13640	0	0	0	0	0	0		0	0	0	0	0	0	0	1	1	1	1		0	0	0	0	0	0	0	0	0	0	0	0		0	0	0	0	0	0	0	0	0	0	0	0	0	0	0	hspR; MerR family transcriptional regulator, heat shock protein HspR
K22491	0	1	1	2	1	1		0	0	0	0	0	0	0	0	0	0	0		0	0	0	1	0	0	0	0	0	0	0	0		1	1	1	0	0	0	0	0	0	0	0	0	0	0	0	litR; MerR family transcriptional regulator, light-induced transcriptional regulator
K03711	0	0	0	0	0	0		1	0	0	1	0	0	0	1	1	1	1		0	0	0	0	0	1	0	0	0	0	0	0		0	0	0	0	0	0	0	0	0	0	0	0	0	0	0	fur, zur, furB; Fur family transcriptional regulator, ferric uptake regulator
K09825	0	0	0	0	0	0		0	0	0	1	1	1	0	0	0	1	1		0	0	0	1	0	1	1	1	1	0	1	1		1	1	1	0	0	2	1	0	1	1	1	2	2	1	0	perR; Fur family transcriptional regulator, peroxide stress response regulator
K09826	0	0	0	0	0	0		0	0	0	0	0	0	0	0	0	0	0		0	0	0	0	0	0	0	0	0	0	0	0		0	0	0	0	0	0	0	0	0	0	1	0	0	0	0	irr; Fur family transcriptional regulator, iron response regulator
K21563	0	1	0	1	1	1		0	0	0	0	0	0	0	0	0	0	0		0	0	0	0	0	0	0	0	0	0	0	0		0	0	0	0	0	0	0	0	0	0	0	0	0	0	0	dnr; CRP/FNR family transcriptional regulator, dissimilatory nitrate respiration regulator
K13643	0	0	0	0	0	0		0	0	0	0	0	0	0	1	1	1	1		0	0	0	0	0	0	0	0	0	0	0	0		0	0	0	0	0	0	0	0	0	0	0	0	0	0	0	iscR; Rrf2 family transcriptional regulator, iron-sulfur cluster assembly transcription factor
K17472	0	0	0	0	0	0		0	0	0	0	0	0	0	1	1	1	1		0	0	0	0	0	0	0	0	0	0	0	0		0	0	0	0	0	0	0	0	0	0	0	0	0	0	0	cymR; Rrf2 family transcriptional regulator, cysteine metabolism repressor
K03892	2	3	4	2	3	3		1	0	0	0	1	0	0	1	0	1	0		3	0	2	1	1	1	1	2	0	1	1	1		1	1	1	0	0	1	0	1	1	1	0	0	2	1	1	arsR; ArsR family transcriptional regulator, arsenate/arsenite/antimonite-responsive transcriptional repressor
K21903	0	1	1	0	1	1		1	1	1	0	1	1	0	0	0	0	0		1	0	0	0	0	0	0	1	0	0	0	0		1	1	1	1	0	1	0	1	1	1	1	0	1	1	1	cadC, smtB; ArsR family transcriptional regulator, lead/cadmium/zinc/bismuth-responsive transcriptional repressor
K03709	2	1	2	2	2	2		0	2	2	0	1	1	0	0	0	0	0		1	1	2	0	1	0	2	0	0	1	0	0		3	3	3	2	2	2	1	4	0	1	1	2	1	1	0	troR; DtxR family transcriptional regulator, Mn-dependent transcriptional regulator
K10947	0	0	1	1	0	0		0	0	0	0	0	0	0	0	0	0	0		0	0	1	0	0	1	1	1	2	1	1	2		0	0	0	0	0	0	0	0	0	0	0	0	0	0	0	padR; PadR family transcriptional regulator, regulatory protein PadR
K03720	0	0	0	0	0	0		0	0	0	0	0	0	0	0	0	0	0		0	0	0	0	0	0	0	0	0	0	0	0		0	0	0	0	0	0	0	0	0	0	0	0	0	0	0	trpR; TrpR family transcriptional regulator, trp operon repressor
K22299	0	0	0	0	0	0		0	0	0	0	0	0	0	0	0	0	0		0	0	1	0	0	0	0	0	0	0	0	0		0	0	0	0	0	0	0	0	0	1	0	0	0	0	0	rghR; HTH-type transcriptional regulator, competence development regulator
K22300	0	0	0	0	0	0		0	0	0	0	0	0	0	0	0	0	0		0	0	1	0	0	0	0	0	0	0	0	0		0	0	0	0	0	0	0	0	0	0	0	0	0	0	0	dicA; HTH-type transcriptional regulator, cell division transcriptional repressor
K18831	1	0	0	2	0	0		0	2	2	0	1	1	0	0	0	0	0		1	0	0	0	0	0	2	0	0	0	1	0		2	2	2	0	0	0	0	0	0	0	1	0	0	1	0	higA; HTH-type transcriptional regulator / antitoxin HigA
K23356	0	0	0	0	0	0		1	0	0	1	1	1	1	0	1	1	1		0	0	0	0	0	0	0	1	1	0	0	0		0	0	0	0	0	0	0	0	0	0	1	0	0	0	0	trmB; HTH-type transcriptional regulator, sugar sensing transcriptional regulator
K21405	0	0	0	0	0	0		0	0	0	0	0	0	0	1	1	1	1		0	0	0	0	0	0	0	0	0	0	0	0		0	0	0	0	0	0	0	0	0	0	0	0	0	0	0	acoR; sigma-54 dependent transcriptional regulator, acetoin dehydrogenase operon transcriptional activator AcoR
K06714	0	0	0	0	0	0		0	0	0	1	0	0	0	1	1	1	1		0	0	0	0	0	0	0	0	0	0	0	0		0	0	0	0	0	0	0	0	0	0	0	0	0	0	0	rocR; arginine utilization regulatory protein
K02019	0	0	0	0	0	0		0	0	0	0	0	0	0	0	0	0	0		0	0	0	0	0	0	0	0	0	0	0	0		0	0	0	0	0	0	0	0	0	0	0	0	0	0	0	modE; molybdate transport system regulatory protein
K01926	0	0	0	0	0	0		0	0	0	0	0	0	0	1	2	1	1		0	1	1	2	0	0	1	1	1	0	0	0		0	0	0	0	0	0	0	0	0	0	0	0	0	0	0	rex; redox-sensing transcriptional repressor
K07726	2	0	0	3	3	4		0	3	5	0	0	0	0	0	0	0	0		0	0	0	0	0	0	0	0	0	0	0	1		0	0	0	0	1	0	0	0	0	0	0	0	0	0	0	K07726; putative transcriptional regulator
K07727	0	0	0	1	0	0		0	0	0	0	0	0	0	0	0	0	0		0	2	0	0	0	0	0	0	0	0	0	0		0	0	0	0	0	0	0	0	0	0	0	0	0	0	0	K07727; putative transcriptional regulator
K07729	0	0	1	1	1	1		1	0	0	1	0	0	0	0	0	0	0		0	0	1	0	0	2	0	0	0	0	1	1		0	0	0	0	0	1	0	0	0	0	0	0	0	0	0	K07729; putative transcriptional regulator
K07722	0	0	0	0	0	0		0	0	0	0	0	0	0	0	0	0	0		0	0	1	1	1	1	1	1	1	1	1	1		0	0	0	0	0	0	0	0	0	0	0	0	0	0	0	nikR; CopG family transcriptional regulator, nickel-responsive regulator
K07723	0	1	0	0	0	0		0	0	1	0	0	0	0	0	0	0	0		0	0	1	0	0	0	1	0	0	0	0	0		0	0	0	0	0	0	0	0	0	0	0	0	0	0	0	ndoAI; CopG family transcriptional regulator / antitoxin EndoAI
K18918	0	0	0	0	0	0		0	0	0	0	0	0	0	0	0	0	0		0	0	0	0	0	0	1	0	0	0	0	0		0	0	0	0	0	0	0	0	0	0	0	0	0	0	0	relB; RHH-type transcriptional regulator, rel operon repressor / antitoxin RelB
K19339	1	0	0	0	0	0		0	0	0	0	0	0	0	0	0	0	0		0	0	0	0	0	0	0	0	0	0	0	0		0	0	0	0	0	0	0	0	0	0	0	0	0	0	0	nosR; NosR/NirI family transcriptional regulator, nitrous oxide reductase regulator
K21600	0	0	0	0	0	0		0	0	0	0	0	0	0	0	0	0	0		0	0	0	0	0	0	0	0	0	0	0	0		0	0	0	0	0	0	0	0	0	0	0	0	0	0	0	csoR, ricR; CsoR family transcriptional regulator, copper-sensing transcriptional repressor
K03497	1	1	1	2	2	4		1	2	1	2	2	2	0	1	1	1	0		3	0	1	3	2	2	2	3	2	2	2	2		2	3	3	1	0	1	1	1	1	4	1	2	2	2	1	parB, spo0J; ParB family transcriptional regulator, chromosome partitioning protein
K07736	0	0	0	0	0	0		0	0	0	0	0	0	0	0	0	0	0		0	0	0	0	0	0	0	0	0	0	0	0		0	1	1	0	0	0	0	0	0	0	0	0	0	0	0	carD; CarD family transcriptional regulator
K05785	0	0	0	0	0	0		0	1	1	0	1	0	0	1	1	0	1		0	0	0	0	0	0	0	0	0	0	0	0		1	1	1	1	0	2	1	1	2	3	1	1	2	2	2	rfaH; transcriptional antiterminator RfaH
K03402	1	1	1	1	1	1		0	0	0	0	0	0	0	1	1	1	1		0	0	0	0	0	0	0	0	0	0	0	0		0	0	0	0	0	0	0	0	0	0	0	0	0	0	0	argR, ahrC; transcriptional regulator of arginine metabolism
K03705	1	1	1	1	1	1		1	1	1	1	1	1	2	1	0	1	1		1	1	1	1	1	1	1	1	1	1	1	1		1	1	1	1	0	1	1	1	1	1	1	1	0	1	1	hrcA; heat-inducible transcriptional repressor
K03708	0	0	0	0	0	0		0	0	0	0	0	0	0	0	0	0	0		0	0	0	0	0	0	0	0	0	0	0	0		0	0	0	0	0	0	0	0	0	0	0	0	0	0	0	ctsR; transcriptional regulator of stress and heat shock response
K03721	0	0	0	0	0	0		0	0	0	1	0	0	0	1	1	1	1		0	0	0	0	0	0	0	0	0	0	0	0		0	0	0	0	0	0	0	0	0	0	0	0	0	0	0	tyrR; transcriptional regulator of aroF, aroG, tyrA and aromatic amino acid transport
K03973	1	1	1	1	1	1		1	1	1	1	1	1	1	2	1	1	1		1	0	1	1	0	1	1	1	1	1	2	2		1	1	1	1	0	1	1	1	1	1	2	1	1	1	0	pspC; phage shock protein C
K05346	0	0	0	0	0	0		0	1	0	0	1	1	0	0	0	0	0		0	0	0	0	0	0	0	0	0	0	0	0		0	0	0	0	0	0	0	0	0	0	0	0	0	0	0	deoR; deoxyribonucleoside regulator
K06140	0	1	1	1	1	1		0	0	0	0	0	0	0	0	0	0	0		0	0	0	0	0	0	0	0	1	0	0	0		0	0	0	0	0	0	0	0	0	0	0	0	0	0	0	rnk; regulator of nucleoside diphosphate kinase
K07733	0	0	0	1	0	0		0	0	0	0	0	0	0	0	0	0	1		0	0	0	0	0	0	0	0	0	0	1	0		1	1	1	0	0	0	0	0	0	0	1	0	0	0	0	alpA; prophage regulatory protein
K07734	0	1	1	1	1	1		0	1	1	0	0	0	0	0	0	0	0		0	0	0	0	0	0	0	0	0	0	0	0		1	1	1	0	0	0	0	0	0	0	0	0	0	0	0	paiB; transcriptional regulator
K07738	1	1	0	2	1	1		1	1	1	1	1	1	1	0	1	1	0		1	0	1	1	1	1	1	1	1	1	1	1		1	1	1	1	1	1	1	1	1	1	1	2	1	1	1	nrdR; transcriptional repressor NrdR
K03086	0	0	0	0	0	0		0	0	0	0	0	0	0	0	0	0	0		0	0	0	0	0	0	0	0	0	0	0	0		0	0	0	0	0	0	0	0	0	0	0	0	0	0	0	rpoD; RNA polymerase primary sigma factor
K03088	22	21	28	27	25	24		12	21	21	8	5	5	3	3	3	4	3		7	9	12	12	10	15	22	13	14	14	15	13		24	25	25	8	12	18	17	13	18	17	22	20	23	18	16	rpoE; RNA polymerase sigma-70 factor, ECF subfamily
K03580	0	0	3	0	2	1		0	1	1	0	1	0	0	0	0	0	0		0	1	1	2	2	1	3	2	1	0	4	3		0	0	0	0	0	0	0	0	0	0	0	0	0	0	0	hepA; ATP-dependent helicase HepA [EC:3.6.4.-]
[truncated: 1,183 more rows]
