# Supplementary material for: Phylogeny, distribution and potential metabolism of candidate bacterial phylum KSB1
Source: PeerJ. 2022 Apr 12;10:e13241. doi: 10.7717/peerj.13241 (PMC9012183; doi:10.7717/peerj.13241)
Supplement: Supplemental Information 8 [file peerj-10-13241-s008.xls]

## Sheet: all output_protein_type G-
nosZ ID	signal peptide predicted
GCA_003576975_1_40_2	LIPO(Sec/SPII)
GCA_008363195_1_85_18	LIPO(Sec/SPII)
GCA_011774205_1_326_8	LIPO(Sec/SPII)
GCA_011775825_1_310_8	LIPO(Sec/SPII)
GCA_011777055_1_326_8	LIPO(Sec/SPII)
GCA_013359385_1_721_2	LIPO(Sec/SPII)
GCA_013359425_1_144_18	LIPO(Sec/SPII)
GCA_014338045_1_265_11	OTHER
GCA_014338045_1_314_11	LIPO(Sec/SPII)
1000176917	TAT(Tat/SPI)
1000241548	LIPO(Sec/SPII)
1000272320	OTHER
1000281805	LIPO(Sec/SPII)
1000283326	LIPO(Sec/SPII)
1000287030	LIPO(Sec/SPII)
1000290910	SP(Sec/SPI)
1002743864	TAT(Tat/SPI)
1003118543	TAT(Tat/SPI)
1012143996	LIPO(Sec/SPII)
1016002427	TAT(Tat/SPI)
1020190190	TAT(Tat/SPI)
1024520184	TAT(Tat/SPI)
1026844558	TAT(Tat/SPI)
1028380893	SP(Sec/SPI)
1028604491	TAT(Tat/SPI)
1032101036	TAT(Tat/SPI)
1041165984	LIPO(Sec/SPII)
1048621878	TAT(Tat/SPI)
1049818671	SP(Sec/SPI)
1049857305	SP(Sec/SPI)
1066937022	LIPO(Sec/SPII)
1071989610	SP(Sec/SPI)
1073967613	OTHER
1085640052	SP(Sec/SPI)
1095152852	SP(Sec/SPI)
1102954474	LIPO(Sec/SPII)
1105518695	OTHER
1108539114	TAT(Tat/SPI)
1109647912	LIPO(Sec/SPII)
111919067	OTHER
111919188	OTHER
1120595644	OTHER
1132410440	TAT(Tat/SPI)
1134496732	TAT(Tat/SPI)
114226627	TAT(Tat/SPI)
1142909490	OTHER
1142910175	OTHER
1147506220	SP(Sec/SPI)
1150420881	OTHER
115383225	OTHER
1167576917	LIPO(Sec/SPII)
1172629728	LIPO(Sec/SPII)
1175435787	LIPO(Sec/SPII)
1179075144	TAT(Tat/SPI)
1181752436	OTHER
1186306329	OTHER
1190186655	TAT(Tat/SPI)
1190236020	OTHER
1194897364	OTHER
1194999898	LIPO(Sec/SPII)
1198028921	OTHER
1199120451	OTHER
1199167347	SP(Sec/SPI)
1199301612	OTHER
1199782430	LIPO(Sec/SPII)
1199784497	LIPO(Sec/SPII)
1212588274	TAT(Tat/SPI)
1213417736	TAT(Tat/SPI)
1214576626	TAT(Tat/SPI)
1215219254	LIPO(Sec/SPII)
1220365374	SP(Sec/SPI)
122890422	OTHER
122890430	OTHER
1229075815	LIPO(Sec/SPII)
1229100437	SP(Sec/SPI)
1229118105	SP(Sec/SPI)
1231150914	OTHER
1231152430	OTHER
1231747530	LIPO(Sec/SPII)
1233024850	TAT(Tat/SPI)
1247080076	OTHER
1259403981	OTHER
126250253	SP(Sec/SPI)
1273831356	TAT(Tat/SPI)
1274764885	TAT(Tat/SPI)
1285290877	SP(Sec/SPI)
1315061376	OTHER
1320618953	TAT(Tat/SPI)
1321019147	TAT(Tat/SPI)
1321372821	TAT(Tat/SPI)
1335786033	TAT(Tat/SPI)
1340274213	TAT(Tat/SPI)
1345641418	OTHER
1345645924	OTHER
1345646629	OTHER
1345646639	OTHER
1345671626	OTHER
1345671632	OTHER
134802381	OTHER
1384247515	OTHER
1388697732	TAT(Tat/SPI)
1388697782	LIPO(Sec/SPII)
1388697860	LIPO(Sec/SPII)
1388697934	LIPO(Sec/SPII)
1388698001	SP(Sec/SPI)
1388698034	LIPO(Sec/SPII)
1388698076	LIPO(Sec/SPII)
1389166369	LIPO(Sec/SPII)
1403635452	OTHER
1418382858	TAT(Tat/SPI)
1431855910	SP(Sec/SPI)
1438650550	OTHER
1438937531	LIPO(Sec/SPII)
1442873863	TAT(Tat/SPI)
1447700262	OTHER
1465384952	LIPO(Sec/SPII)
1465405350	TAT(Tat/SPI)
1474365276	LIPO(Sec/SPII)
1474787501	SP(Sec/SPI)
1474797608	SP(Sec/SPI)
1475518043	TAT(Tat/SPI)
1480122851	OTHER
1481141845	LIPO(Sec/SPII)
1481175833	TAT(Tat/SPI)
1482336731	SP(Sec/SPI)
1496231194	OTHER
1509749784	SP(Sec/SPI)
1509750170	LIPO(Sec/SPII)
1509750665	OTHER
1509750667	LIPO(Sec/SPII)
1509753592	LIPO(Sec/SPII)
1514762823	LIPO(Sec/SPII)
1514765117	LIPO(Sec/SPII)
1519569291	LIPO(Sec/SPII)
1526252642	OTHER
1527207440	OTHER
1537762079	LIPO(Sec/SPII)
1537764588	OTHER
1540036681	TAT(Tat/SPI)
1542843771	LIPO(Sec/SPII)
1548954651	OTHER
1548956178	LIPO(Sec/SPII)
156254589	OTHER
156254593	OTHER
156446869	OTHER
156446875	OTHER
1593420592	TAT(Tat/SPI)
1597472845	OTHER
1597473068	SP(Sec/SPI)
159877788	LIPO(Sec/SPII)
159881137	SP(Sec/SPI)
1600714463	LIPO(Sec/SPII)
1607202618	OTHER
160917817	OTHER
160917831	OTHER
1633245485	OTHER
164508576	OTHER
164508654	OTHER
164508660	OTHER
1654107676	LIPO(Sec/SPII)
1654117432	OTHER
1663144216	OTHER
1679651553	LIPO(Sec/SPII)
1691160535	TAT(Tat/SPI)
1702207232	TAT(Tat/SPI)
1705333864	OTHER
1705337314	LIPO(Sec/SPII)
1705337565	OTHER
1707062549	OTHER
1707799343	OTHER
1708320607	OTHER
1712641851	SP(Sec/SPI)
1714000548	TAT(Tat/SPI)
1717398266	OTHER
1721157988	OTHER
1721642957	LIPO(Sec/SPII)
1721663164	LIPO(Sec/SPII)
1721663173	OTHER
1724548838	SP(Sec/SPI)
1729900566	LIPO(Sec/SPII)
1735050474	TAT(Tat/SPI)
1751368192	SP(Sec/SPI)
1755143188	OTHER
1755686283	TAT(Tat/SPI)
1756490869	SP(Sec/SPI)
1756829774	TAT(Tat/SPI)
1761812711	SP(Sec/SPI)
195541830	TAT(Tat/SPI)
196171719	LIPO(Sec/SPII)
213013099	OTHER
213013104	OTHER
213013106	OTHER
213013114	OTHER
219997038	TAT(Tat/SPI)
221157686	TAT(Tat/SPI)
224803708	LIPO(Sec/SPII)
225001281	OTHER
225001284	OTHER
225637811	OTHER
225637821	OTHER
225645437	SP(Sec/SPI)
226089982	TAT(Tat/SPI)
226346940	OTHER
226347110	OTHER
226347116	OTHER
226347198	OTHER
228275140	LIPO(Sec/SPII)
237788153	OTHER
237865625	TAT(Tat/SPI)
240015462	OTHER
240015506	OTHER
240015518	OTHER
258690650	OTHER
258690656	OTHER
262335096	LIPO(Sec/SPII)
269786029	TAT(Tat/SPI)
285878243	OTHER
288786883	LIPO(Sec/SPII)
288892779	TAT(Tat/SPI)
29125960	OTHER
301799098	TAT(Tat/SPI)
3057081	OTHER
309261791	OTHER
312294149	OTHER
312943496	LIPO(Sec/SPII)
319418655	SP(Sec/SPI)
319423319	LIPO(Sec/SPII)
322410212	OTHER
324975192	LIPO(Sec/SPII)
334887988	TAT(Tat/SPI)
336303467	LIPO(Sec/SPII)
343801528	SP(Sec/SPI)
344226201	SP(Sec/SPI)
345125582	OTHER
348611810	TAT(Tat/SPI)
349781194	TAT(Tat/SPI)
353194438	OTHER
356641515	TAT(Tat/SPI)
359349993	LIPO(Sec/SPII)
364578998	TAT(Tat/SPI)
372007310	LIPO(Sec/SPII)
372470662	SP(Sec/SPI)
374855675	OTHER
376372740	OTHER
376372748	OTHER
376372798	OTHER
376372800	OTHER
381381938	LIPO(Sec/SPII)
388429536	TAT(Tat/SPI)
388446965	TAT(Tat/SPI)
390190066	TAT(Tat/SPI)
390418914	LIPO(Sec/SPII)
395811594	LIPO(Sec/SPII)
406897654	LIPO(Sec/SPII)
407200473	TAT(Tat/SPI)
408467359	LIPO(Sec/SPII)
417353475	OTHER
417353479	OTHER
417353489	OTHER
417353517	OTHER
425877641	TAT(Tat/SPI)
441437412	LIPO(Sec/SPII)
445672417	OTHER
452965895	OTHER
4633571	OTHER
4633583	OTHER
4633586	OTHER
478733306	OTHER
507722983	LIPO(Sec/SPII)
508729008	TAT(Tat/SPI)
515413689	TAT(Tat/SPI)
524660899	SP(Sec/SPI)
528096198	TAT(Tat/SPI)
528864002	TAT(Tat/SPI)
563344335	TAT(Tat/SPI)
568635338	OTHER
575461516	LIPO(Sec/SPII)
576866815	OTHER
584380914	TAT(Tat/SPI)
589595821	OTHER
590102084	TAT(Tat/SPI)
612502014	TAT(Tat/SPI)
646261193	TAT(Tat/SPI)
660634355	LIPO(Sec/SPII)
686206048	SP(Sec/SPI)
731479951	LIPO(Sec/SPII)
76057407	OTHER
76057417	OTHER
76057489	OTHER
76057545	OTHER
76058146	OTHER
76058199	OTHER
816199774	TAT(Tat/SPI)
82947026	SP(Sec/SPI)
907657673	TAT(Tat/SPI)
909841380	TAT(Tat/SPI)
913016410	TAT(Tat/SPI)
913354940	OTHER
922791888	TAT(Tat/SPI)
922814415	SP(Sec/SPI)
931390206	OTHER
931419820	OTHER
931428877	OTHER
931472640	OTHER
934117174	OTHER
936514835	LIPO(Sec/SPII)
939542509	TAT(Tat/SPI)
945845730	TAT(Tat/SPI)
951276956	LIPO(Sec/SPII)
952340330	OTHER
980007961	OTHER
980263067	OTHER
983032461	TAT(Tat/SPI)
987433201	LIPO(Sec/SPII)

## Sheet: all output_protein_type_G+
nosZ ID	signal peptide predicted
GCA_003576975_1_40_2	LIPO(Sec/SPII)
GCA_008363195_1_85_18	LIPO(Sec/SPII)
GCA_011774205_1_326_8	LIPO(Sec/SPII)
GCA_011775825_1_310_8	LIPO(Sec/SPII)
GCA_011777055_1_326_8	LIPO(Sec/SPII)
GCA_013359385_1_721_2	LIPO(Sec/SPII)
GCA_013359425_1_144_18	LIPO(Sec/SPII)
GCA_014338045_1_265_11	OTHER
GCA_014338045_1_314_11	LIPO(Sec/SPII)
1000176917	TAT(Tat/SPI)
1000241548	LIPO(Sec/SPII)
1000272320	OTHER
1000281805	LIPO(Sec/SPII)
1000283326	LIPO(Sec/SPII)
1000287030	LIPO(Sec/SPII)
1000290910	SP(Sec/SPI)
1002743864	TAT(Tat/SPI)
1003118543	TAT(Tat/SPI)
1012143996	LIPO(Sec/SPII)
1016002427	TAT(Tat/SPI)
1020190190	TAT(Tat/SPI)
1024520184	TAT(Tat/SPI)
1026844558	TAT(Tat/SPI)
1028380893	SP(Sec/SPI)
1028604491	TAT(Tat/SPI)
1032101036	TAT(Tat/SPI)
1041165984	LIPO(Sec/SPII)
1048621878	TAT(Tat/SPI)
1049818671	SP(Sec/SPI)
1049857305	SP(Sec/SPI)
1066937022	LIPO(Sec/SPII)
1071989610	SP(Sec/SPI)
1073967613	SP(Sec/SPI)
1085640052	SP(Sec/SPI)
1095152852	SP(Sec/SPI)
1102954474	LIPO(Sec/SPII)
1105518695	OTHER
1108539114	TAT(Tat/SPI)
1109647912	LIPO(Sec/SPII)
111919067	OTHER
111919188	OTHER
1120595644	OTHER
1132410440	TAT(Tat/SPI)
1134496732	TAT(Tat/SPI)
114226627	TAT(Tat/SPI)
1142909490	OTHER
1142910175	OTHER
1147506220	SP(Sec/SPI)
1150420881	OTHER
115383225	OTHER
1167576917	LIPO(Sec/SPII)
1172629728	LIPO(Sec/SPII)
1175435787	LIPO(Sec/SPII)
1179075144	TAT(Tat/SPI)
1181752436	SP(Sec/SPI)
1186306329	OTHER
1190186655	TAT(Tat/SPI)
1190236020	OTHER
1194897364	OTHER
1194999898	LIPO(Sec/SPII)
1198028921	SP(Sec/SPI)
1199120451	SP(Sec/SPI)
1199167347	SP(Sec/SPI)
1199301612	OTHER
1199782430	LIPO(Sec/SPII)
1199784497	LIPO(Sec/SPII)
1212588274	TAT(Tat/SPI)
1213417736	TAT(Tat/SPI)
1214576626	TAT(Tat/SPI)
1215219254	LIPO(Sec/SPII)
1220365374	SP(Sec/SPI)
122890422	OTHER
122890430	OTHER
1229075815	LIPO(Sec/SPII)
1229100437	SP(Sec/SPI)
1229118105	SP(Sec/SPI)
1231150914	SP(Sec/SPI)
1231152430	SP(Sec/SPI)
1231747530	LIPO(Sec/SPII)
1233024850	TAT(Tat/SPI)
1247080076	SP(Sec/SPI)
1259403981	OTHER
126250253	SP(Sec/SPI)
1273831356	TAT(Tat/SPI)
1274764885	TAT(Tat/SPI)
1285290877	SP(Sec/SPI)
1315061376	SP(Sec/SPI)
1320618953	TAT(Tat/SPI)
1321019147	TAT(Tat/SPI)
1321372821	TAT(Tat/SPI)
1335786033	TAT(Tat/SPI)
1340274213	TAT(Tat/SPI)
1345641418	OTHER
1345645924	OTHER
1345646629	OTHER
1345646639	OTHER
1345671626	OTHER
1345671632	OTHER
134802381	OTHER
1384247515	SP(Sec/SPI)
1388697732	TAT(Tat/SPI)
1388697782	LIPO(Sec/SPII)
1388697860	LIPO(Sec/SPII)
1388697934	LIPO(Sec/SPII)
1388698001	SP(Sec/SPI)
1388698034	LIPO(Sec/SPII)
1388698076	LIPO(Sec/SPII)
1389166369	LIPO(Sec/SPII)
1403635452	SP(Sec/SPI)
1418382858	TAT(Tat/SPI)
1431855910	SP(Sec/SPI)
1438650550	OTHER
1438937531	LIPO(Sec/SPII)
1442873863	TAT(Tat/SPI)
1447700262	SP(Sec/SPI)
1465384952	LIPO(Sec/SPII)
1465405350	TAT(Tat/SPI)
1474365276	LIPO(Sec/SPII)
1474787501	SP(Sec/SPI)
1474797608	SP(Sec/SPI)
1475518043	TAT(Tat/SPI)
1480122851	SP(Sec/SPI)
1481141845	LIPO(Sec/SPII)
1481175833	TAT(Tat/SPI)
1482336731	SP(Sec/SPI)
1496231194	OTHER
1509749784	SP(Sec/SPI)
1509750170	LIPO(Sec/SPII)
1509750665	SP(Sec/SPI)
1509750667	LIPO(Sec/SPII)
1509753592	LIPO(Sec/SPII)
1514762823	LIPO(Sec/SPII)
1514765117	LIPO(Sec/SPII)
1519569291	LIPO(Sec/SPII)
1526252642	OTHER
1527207440	OTHER
1537762079	LIPO(Sec/SPII)
1537764588	SP(Sec/SPI)
1540036681	TAT(Tat/SPI)
1542843771	LIPO(Sec/SPII)
1548954651	SP(Sec/SPI)
1548956178	LIPO(Sec/SPII)
156254589	OTHER
156254593	OTHER
156446869	OTHER
156446875	OTHER
1593420592	TAT(Tat/SPI)
1597472845	OTHER
1597473068	SP(Sec/SPI)
159877788	LIPO(Sec/SPII)
159881137	SP(Sec/SPI)
1600714463	LIPO(Sec/SPII)
1607202618	OTHER
160917817	OTHER
160917831	OTHER
1633245485	OTHER
164508576	OTHER
164508654	OTHER
164508660	OTHER
1654107676	LIPO(Sec/SPII)
1654117432	SP(Sec/SPI)
1663144216	SP(Sec/SPI)
1679651553	LIPO(Sec/SPII)
1691160535	TAT(Tat/SPI)
1702207232	TAT(Tat/SPI)
1705333864	SP(Sec/SPI)
1705337314	LIPO(Sec/SPII)
1705337565	OTHER
1707062549	OTHER
1707799343	SP(Sec/SPI)
1708320607	OTHER
1712641851	SP(Sec/SPI)
1714000548	TAT(Tat/SPI)
1717398266	SP(Sec/SPI)
1721157988	OTHER
1721642957	LIPO(Sec/SPII)
1721663164	LIPO(Sec/SPII)
1721663173	SP(Sec/SPI)
1724548838	SP(Sec/SPI)
1729900566	LIPO(Sec/SPII)
1735050474	TAT(Tat/SPI)
1751368192	SP(Sec/SPI)
1755143188	OTHER
1755686283	TAT(Tat/SPI)
1756490869	SP(Sec/SPI)
1756829774	TAT(Tat/SPI)
1761812711	SP(Sec/SPI)
195541830	TAT(Tat/SPI)
196171719	LIPO(Sec/SPII)
213013099	OTHER
213013104	OTHER
213013106	OTHER
213013114	OTHER
219997038	TAT(Tat/SPI)
221157686	TAT(Tat/SPI)
224803708	LIPO(Sec/SPII)
225001281	OTHER
225001284	OTHER
225637811	OTHER
225637821	OTHER
225645437	SP(Sec/SPI)
226089982	LIPO(Sec/SPII)
226346940	OTHER
226347110	OTHER
226347116	OTHER
226347198	OTHER
228275140	LIPO(Sec/SPII)
237788153	OTHER
237865625	TAT(Tat/SPI)
240015462	OTHER
240015506	OTHER
240015518	OTHER
258690650	OTHER
258690656	OTHER
262335096	LIPO(Sec/SPII)
269786029	TAT(Tat/SPI)
285878243	OTHER
288786883	LIPO(Sec/SPII)
288892779	TAT(Tat/SPI)
29125960	OTHER
301799098	TAT(Tat/SPI)
3057081	OTHER
309261791	OTHER
312294149	OTHER
312943496	LIPO(Sec/SPII)
319418655	SP(Sec/SPI)
319423319	LIPO(Sec/SPII)
322410212	OTHER
324975192	LIPO(Sec/SPII)
334887988	TAT(Tat/SPI)
336303467	LIPO(Sec/SPII)
343801528	SP(Sec/SPI)
344226201	SP(Sec/SPI)
345125582	OTHER
348611810	TAT(Tat/SPI)
349781194	TAT(Tat/SPI)
353194438	OTHER
356641515	TAT(Tat/SPI)
359349993	LIPO(Sec/SPII)
364578998	TAT(Tat/SPI)
372007310	LIPO(Sec/SPII)
372470662	SP(Sec/SPI)
374855675	OTHER
376372740	OTHER
376372748	OTHER
376372798	OTHER
376372800	OTHER
381381938	LIPO(Sec/SPII)
388429536	TAT(Tat/SPI)
388446965	TAT(Tat/SPI)
390190066	TAT(Tat/SPI)
390418914	LIPO(Sec/SPII)
395811594	LIPO(Sec/SPII)
406897654	LIPO(Sec/SPII)
407200473	TAT(Tat/SPI)
408467359	LIPO(Sec/SPII)
417353475	OTHER
417353479	OTHER
417353489	OTHER
417353517	OTHER
425877641	TAT(Tat/SPI)
441437412	LIPO(Sec/SPII)
445672417	OTHER
452965895	OTHER
4633571	OTHER
4633583	OTHER
4633586	OTHER
478733306	OTHER
507722983	LIPO(Sec/SPII)
508729008	TAT(Tat/SPI)
515413689	TAT(Tat/SPI)
524660899	SP(Sec/SPI)
528096198	TAT(Tat/SPI)
528864002	TAT(Tat/SPI)
563344335	TAT(Tat/SPI)
568635338	OTHER
575461516	LIPO(Sec/SPII)
576866815	OTHER
584380914	TAT(Tat/SPI)
589595821	OTHER
590102084	TAT(Tat/SPI)
612502014	TAT(Tat/SPI)
646261193	TAT(Tat/SPI)
660634355	LIPO(Sec/SPII)
686206048	SP(Sec/SPI)
731479951	LIPO(Sec/SPII)
76057407	OTHER
76057417	OTHER
76057489	OTHER
76057545	OTHER
76058146	OTHER
76058199	OTHER
816199774	TAT(Tat/SPI)
82947026	SP(Sec/SPI)
907657673	TAT(Tat/SPI)
909841380	TAT(Tat/SPI)
913016410	TAT(Tat/SPI)
913354940	OTHER
922791888	TAT(Tat/SPI)
922814415	SP(Sec/SPI)
931390206	OTHER
931419820	OTHER
931428877	OTHER
931472640	OTHER
934117174	OTHER
936514835	LIPO(Sec/SPII)
939542509	TAT(Tat/SPI)
945845730	TAT(Tat/SPI)
951276956	LIPO(Sec/SPII)
952340330	SP(Sec/SPI)
980007961	OTHER
980263067	SP(Sec/SPI)
983032461	TAT(Tat/SPI)
987433201	LIPO(Sec/SPII)
